# Supplementary material
Source: PubMed Central journal article supplement (PMC9340662)

# C–H Amination Mediated by Cobalt Organoazide Adducts and the Corresponding Cobalt Nitrenoid Intermediates

Yunjung Baek,<sup>†</sup> Anuvab Das,<sup>‡</sup> Shao-Liang Zheng,<sup>†</sup> Joseph H. Reibenspies,<sup>‡</sup> David C. Powers,<sup>‡</sup>  
and Theodore A. Betley<sup>†\*</sup>

<sup>†</sup>*Department of Chemistry and Chemical Biology  
Harvard University  
12 Oxford Street, Cambridge, Massachusetts 02138*

<sup>‡</sup>*Department of Chemistry  
3255 TAMU, Texas A&M University  
College Station, Texas 77843*

|                                                                                                                                                                       | <b>Page</b> |
|-----------------------------------------------------------------------------------------------------------------------------------------------------------------------|-------------|
| <b>General Considerations</b> .....                                                                                                                                   | 5           |
| <b>Characterization and Physical Measurements</b> .....                                                                                                               | 6           |
| <b>Metal Complexes Syntheses</b> .....                                                                                                                                | 7           |
| <b>Non-Covalent Interaction Analysis</b> .....                                                                                                                        | 15          |
| <b>Figure S-1.</b> Non-covalent interaction plot for <b>3</b> .....                                                                                                   | 15          |
| <b>Stoichiometric Reactions</b> .....                                                                                                                                 | 16          |
| <b>Reaction with cyclohexene.</b> .....                                                                                                                               | 16          |
| <b>Reaction with styrene</b> .....                                                                                                                                    | 17          |
| <b>Spectroscopic Characterization</b> .....                                                                                                                           | 18          |
| <b>Figure S-2.</b> Solution IR spectra of 1-azido-4-methylpentane and <b>8</b> .....                                                                                  | 18          |
| <b>Figure S-3.</b> Solution IR spectra of (4-azidobutyl)benzene and <b>15</b> .....                                                                                   | 18          |
| <b>Figure S-4.</b> Solution IR spectra of 1-azido-4-methylpentane and <b>17</b> in benzene in the presence of a slight excess amount of 1-azido-4-methylpentane. .... | 19          |
| <b>Figure S-5.</b> Solution IR spectra of 1-azidobutane and <b>19</b> .....                                                                                           | 19          |
| <b>Figure S-6.</b> Frozen toluene EPR spectrum of <b>8</b> at 4 K. ....                                                                                               | 20          |
| <b>Reactivity Studies on 8</b> .....                                                                                                                                  | 21          |
| <b>Figure S-7.</b> Reaction progression for the conversion of <b>8</b> to the corresponding imine complex .                                                           | 21          |
| <b>Binding equilibrium between 11 and alkyl azides</b> .....                                                                                                          | 22          |

|                                                                                                                                                                                                           |    |
|-----------------------------------------------------------------------------------------------------------------------------------------------------------------------------------------------------------|----|
| <b>Figure S-8.</b> 600 MHz $^1\text{H}$ NMR spectra of <b>17</b> at varying concentrations of 1-azido-4-methylpentane in benzene- $d_6$ at 25 °C.....                                                     | 22 |
| <b>Job plot analysis.</b> .....                                                                                                                                                                           | 23 |
| <b>Figure S-9.</b> Job plot obtained at 25 °C in benzene- $d_6$ with $[\text{Co}] + [\text{RN}_3] = 8.85$ mM. ....                                                                                        | 23 |
| <b>Table S-1.</b> Chemical shifts (ppm) of <b>11</b> as a function of $[\text{RN}_3]$ at 25 °C in benzene- $d_6$ .....                                                                                    | 23 |
| <b><math>^1\text{H}</math> NMR titration.</b> .....                                                                                                                                                       | 24 |
| <b>Figure S-10.</b> 600 MHz $^1\text{H}$ NMR titration curves of <b>11</b> with organoazides. ....                                                                                                        | 24 |
| <b>Reactivity studies on <b>19</b> with cyclohexene.</b> .....                                                                                                                                            | 25 |
| <b>Figure S-11.</b> Reaction progression for the conversion of <b>19</b> to <b>21</b> in benzene- $d_6$ at 40 °C.....                                                                                     | 25 |
| <b><math>^1\text{H}</math> NMR Spectra of Metal Compounds</b> .....                                                                                                                                       | 26 |
| <b>Figure S-12.</b> 500 MHz $^1\text{H}$ NMR spectrum of $(^{\text{Ar}}\text{L})\text{CoBr}$ ( <b>2</b> ) in benzene- $d_6$ . ....                                                                        | 26 |
| <b>Figure S-13.</b> 500 MHz $^1\text{H}$ NMR spectrum of $(^{\text{Ar}}\text{L})\text{CoBr}(\text{N}_3(\text{C}_6\text{H}_4\text{-}p\text{-}^t\text{Bu}))$ ( <b>3</b> ) in benzene- $d_6$ .....           | 26 |
| <b>Figure S-14.</b> 500 MHz $^1\text{H}$ NMR spectrum of $(^{\text{Ar}}\text{L})\text{CoBr}([3+2]\text{annulation})$ ( <b>4</b> ) in benzene- $d_6$ . ...                                                 | 27 |
| <b>Figure S-15.</b> 500 MHz $^1\text{H}$ NMR spectrum of $(^{\text{Ar}}\text{L})\text{CoBr}(\text{NH}_2(\text{C}_6\text{H}_4\text{-}p\text{-}^t\text{Bu}))$ ( <b>5</b> ) in benzene- $d_6$ . ..           | 27 |
| <b>Figure S-16.</b> 500 MHz $^1\text{H}$ NMR spectra of $(^{\text{Ar}}\text{L})\text{CoBr}(\text{N}_3\text{CH}_2\text{R})$ ( <b>6</b> , <b>7</b> , and <b>8</b> ) in benzene- $d_6$ .....                 | 28 |
| <b>Figure S-17.</b> 500 MHz $^1\text{H}$ NMR spectrum of $(^{\text{Ar}}\text{L})\text{CoBr}(\text{NHCHC}_6\text{H}_5)$ ( <b>9</b> ) in benzene- $d_6$ .....                                               | 29 |
| <b>Figure S-18.</b> 500 MHz $^1\text{H}$ NMR spectra of (a) $[(^{\text{tBu}}\text{L})\text{CoCl}]_2$ ( <b>10</b> ) and (b) $[(^{\text{tBu}}\text{L})\text{CoBr}]_2$ ( <b>11</b> ) in benzene- $d_6$ ..... | 29 |
| <b>Figure S-19.</b> 500 MHz $^1\text{H}$ NMR spectrum of $(^{\text{tBu}}\text{L})\text{CoBr}(\text{thf})$ ( <b>12</b> ) in benzene- $d_6$ .....                                                           | 30 |
| <b>Figure S-20.</b> 500 MHz $^1\text{H}$ NMR spectrum of $(^{\text{tBu}}\text{L})\text{CoCl}(1,2,3\text{-dihydrotriazole})$ ( <b>14</b> ) in benzene- $d_6$ .....                                         | 30 |
| <b>Figure S-21.</b> 500 MHz $^1\text{H}$ NMR spectra of $(^{\text{tBu}}\text{L})\text{CoCl}(\text{N}_3\text{R})$ ( <b>15</b> , <b>17</b> , and <b>19</b> ) in benzene- $d_6$ .....                        | 31 |
| <b>Figure S-22.</b> 500 MHz $^1\text{H}$ NMR spectrum of $(^{\text{tBu}}\text{L})\text{CoCl}(2\text{-phenylpyrrolidine})$ ( <b>16</b> ) in benzene- $d_6$ .....                                           | 32 |
| <b>Figure S-23.</b> 500 MHz $^1\text{H}$ NMR spectrum of $(^{\text{tBu}}\text{L})\text{CoCl}(2,2\text{-dimethylpyrrolidine})$ ( <b>18</b> ) in benzene- $d_6$ .....                                       | 32 |
| <b>Figure S-24.</b> 500 MHz $^1\text{H}$ NMR spectrum of $(^{\text{tBu}}\text{L})\text{CoCl}(\text{butan-1-imine})$ ( <b>20</b> ) in benzene- $d_6$ ....                                                  | 33 |
| <b>Figure S-25.</b> 500 MHz $^1\text{H}$ NMR spectrum of $(^{\text{tBu}}\text{L})\text{CoCl}(n\text{-BuNH}_2)$ ( <b>21</b> ) in benzene- $d_6$ .....                                                      | 33 |
| <b>X-Ray Diffraction Techniques</b> .....                                                                                                                                                                 | 34 |
| <b>Table S-2.</b> Changes in occupancy of nitrogen atoms for <b>8</b> .....                                                                                                                               | 37 |
| <b>Figure S-26.</b> Difference density map obtained for complex <b>8</b> at 100 K following four iterations of heating at 345 K.....                                                                      | 38 |
| <b>Figure S-27.</b> Solid-state molecular structure for <b>8-N<sub>2</sub></b> .....                                                                                                                      | 39 |
| <b>Figure S-28.</b> Changes in occupancy of the organoazide N-atoms in <b>7</b> during synchrotron irradiation ( $\lambda = 0.41328$ Å).....                                                              | 40 |

|                                                                                                                                                                                        |    |
|----------------------------------------------------------------------------------------------------------------------------------------------------------------------------------------|----|
| <b>Figure S-29.</b> Changes in occupancy of the organoazide N-atoms in <b>8</b> during synchrotron irradiation ( $\lambda = 0.41328 \text{ \AA}$ ).....                                | 40 |
| <b>Figure S-30.</b> Electron density map for <b>7-N<sub>2</sub></b> .....                                                                                                              | 41 |
| <b>Figure S-31.</b> Electron density map for <b>8-N<sub>2</sub></b> .....                                                                                                              | 42 |
| <b>Figure S-32.</b> Solid-state molecular structure for <b>7-N<sub>2</sub></b> .....                                                                                                   | 43 |
| <b>Figure S-33.</b> Solid-state molecular structure for <b>8-N<sub>2</sub></b> .....                                                                                                   | 44 |
| <b>Table S-3. X-ray diffraction experimental details</b> .....                                                                                                                         | 45 |
| <b>Figure S-34.</b> Solid-state molecular structure for ( <sup>Ar</sup> L)CoBr(N <sub>3</sub> (C <sub>6</sub> H <sub>4</sub> - <i>p</i> - <sup>t</sup> Bu)) ( <b>3</b> ).....          | 49 |
| <b>Figure S-35.</b> Solid-state molecular structure for ( <sup>Ar</sup> L)CoBr([3+2]annulation) ( <b>4</b> ) .....                                                                     | 50 |
| <b>Figure S-36.</b> Solid-state molecular structure for ( <sup>Ar</sup> L)CoBr(NH <sub>2</sub> (C <sub>6</sub> H <sub>4</sub> - <i>p</i> - <sup>t</sup> Bu)) ( <b>5</b> ).....         | 51 |
| <b>Figure S-37.</b> Solid-state molecular structure for ( <sup>Ar</sup> L)CoBr(N <sub>3</sub> R) ( <b>7</b> ) .....                                                                    | 52 |
| <b>Figure S-38.</b> Solid-state molecular structure for ( <sup>Ar</sup> L)CoBr(N <sub>3</sub> R) ( <b>8</b> ) .....                                                                    | 53 |
| <b>Figure S-39.</b> Solid-state molecular structure for ( <sup>Ar</sup> L)CoBr(NHCHC <sub>6</sub> H <sub>5</sub> ) ( <b>9</b> ).....                                                   | 54 |
| <b>Figure S-40.</b> Solid-state molecular structure for [( <sup>t</sup> BuL)CoBr] <sub>2</sub> ( <b>11</b> ).....                                                                      | 55 |
| <b>Figure S-41.</b> Solid-state molecular structure for ( <sup>t</sup> BuL)CoBr(thf) ( <b>12</b> ).....                                                                                | 56 |
| <b>Figure S-42.</b> Solid-state molecular structure for ( <sup>t</sup> BuL)CoBr(1,2,3-dihydrotriazole) ( <b>14-Br</b> ).....                                                           | 57 |
| <b>Figure S-43.</b> Solid-state molecular structure for ( <sup>t</sup> BuL)CoBr(2-phenylpyrrolidine) ( <b>16-Br</b> ).....                                                             | 58 |
| <b>Figure S-44.</b> Solid-state molecular structure for ( <sup>t</sup> BuL)CoCl(2,2-dimethylpyrrolidine) ( <b>18</b> ) .....                                                           | 59 |
| <b>Figure S-45.</b> Solid-state molecular structure for ( <sup>t</sup> BuL)CoCl(NHCH(CH <sub>2</sub> )CH <sub>3</sub> ) ( <b>20</b> ) .....                                            | 60 |
| <b>Figure S-46.</b> Solid-state molecular structure for ( <sup>t</sup> BuL)CoCl( <i>n</i> -BuNH <sub>2</sub> ) ( <b>21</b> ).....                                                      | 61 |
| <b>Computational Methods</b> .....                                                                                                                                                     | 62 |
| <b>Table S-4.</b> Summary of the geometry optimized results of <b>8-N<sub>2</sub></b> as Co(IV) imido at the $S = 1/2$ , $3/2$ , and $5/2$ spin states .....                           | 64 |
| <b>Table S-5.</b> Summary of the broken-symmetry geometry optimized results of <b>8-N<sub>2</sub></b> as Co(III) iminyl at the $S = 1$ and $S = 2$ spin states.....                    | 64 |
| <b>Figure S-47.</b> Geometry optimized molecular structure and Mulliken spin density plot ( $\alpha$ - $\beta$ ) of <b>8-N<sub>2</sub></b> at an $S = 1/2$ spin state of Co(IV). ..... | 65 |
| <b>Figure S-48.</b> Geometry optimized molecular structure and Mulliken spin density plot ( $\alpha$ - $\beta$ ) of <b>8-N<sub>2</sub></b> at an $S = 3/2$ spin state of Co(IV). ..... | 65 |
| <b>Figure S-49.</b> Geometry optimized molecular structure and Mulliken spin density plot ( $\alpha$ - $\beta$ ) of <b>8-N<sub>2</sub></b> at an $S = 5/2$ spin state of Co(IV). ..... | 66 |
| <b>Figure S-50.</b> Geometry optimized molecular structure and Mulliken spin density plot ( $\alpha$ - $\beta$ ) of <b>8-N<sub>2</sub></b> at an $S = 1$ spin state of Co(III).....    | 66 |
| <b>Figure S-51.</b> Geometry optimized molecular structure and Mulliken spin density plot ( $\alpha$ - $\beta$ ) of <b>8-N<sub>2</sub></b> at an $S = 2$ spin state of Co(III).....    | 67 |
| <b>Table S-6.</b> Coordinates of optimized molecular structure for the truncated Co-nitrenoid ( <b>8-N<sub>2</sub></b> ) at low-spin Co(IV) state.....                                 | 67 |

|                                                                                                                                                                   |    |
|-------------------------------------------------------------------------------------------------------------------------------------------------------------------|----|
| <b>Table S-7.</b> Coordinates of optimized molecular structure for the truncated Co-nitrenoid ( <b>8-N<sub>2</sub></b> ) at intermediate-spin Co(IV) state .....  | 70 |
| <b>Table S-8.</b> Coordinates of optimized molecular structure for the truncated Co-nitrenoid ( <b>8-N<sub>2</sub></b> ) at high-spin Co(IV) state.....           | 73 |
| <b>Table S-9.</b> Coordinates of optimized molecular structure for the truncated Co-nitrenoid ( <b>8-N<sub>2</sub></b> ) at intermediate-spin Co(III) state.....  | 75 |
| <b>Table S-10.</b> Coordinates of optimized molecular structure for the truncated Co-nitrenoid ( <b>8-N<sub>2</sub></b> ) at intermediate-spin Co(III) state..... | 78 |
| <b>References</b> .....                                                                                                                                           | 82 |
| <b>CheckCIF reports for crystallographic data</b> .....                                                                                                           | 81 |

## General Considerations.

All manipulations of metal complexes were carried out in the absence of water and dioxygen using standard Schlenk techniques, or in an MBraun inert atmosphere drybox under a dinitrogen atmosphere. Ligand and ligand precursors were synthesized as previously reported.<sup>1</sup> (<sup>Ar</sup>L)CoCl(py) (**1**)<sup>2</sup> and (<sup>Ar</sup>L)CoBr (**2**)<sup>3</sup> were prepared as previously reported. All glassware was oven dried for a minimum of 1 hour and cooled in an evacuated antechamber prior to use in the drybox. Benzene, diethyl ether, *n*-hexane, toluene, pentane, dichloromethane, and tetrahydrofuran were dried over 4 Å molecular sieves (Strem) prior to use. Chloroform-*d* was purchased from Cambridge Isotope Labs and used as received. Benzene-*d*<sub>6</sub> was purchased from Cambridge Isotope Labs, degassed, and stored over 4 Å molecular sieves prior to use. 4-(*tert*-butyl)aniline, 2,4,6-trifluoroaniline, 2,3,4,5,6-pentafluoroaniline, sodium azide, sodium nitrite, *tert*-butyl nitrite, 1,4-cyclohexadiene, styrene, and trifluoroacetic acid were purchased from Aldrich. All C–H substrates were dried over calcium hydride and distilled under nitrogen or vacuum. 1-Azido-4-(*tert*-butyl)benzene was synthesized following published literature procedures.<sup>4</sup> 1-Azido-2,3,4,5,6-pentafluorobenzene and 2-azido-1,3,5-trifluorobenzene were synthesized following published literature procedure.<sup>5</sup> (Azidomethyl)benzene was purchased from Alfa Aesar and used as received. 1-Azidobutane, 1-azido-4-methylpentane, (4-azidobutyl)benzene, and 6-azidohex-1-ene were prepared as previously reported.<sup>6</sup> Anhydrous cobalt(II) bromide was purchased from Aldrich and used as received. Celite® 545 (J. T. Baker) was dried in a Schlenk flask for 24 h under dynamic vacuum while heating to at least 150 °C prior to use in a drybox. Silica gel 32-63 μ (AIC, Framingham, MA) was used as received.

### **Characterization and Physical Measurements.**

<sup>1</sup>H NMR spectra were recorded on Varian Unity/Inova 500 MHz- or Agilent DD2 600 MHz spectrometers. <sup>1</sup>H NMR chemical shifts are reported relative to SiMe<sub>4</sub> using the chemical shift of residual solvent peaks as reference. Gas chromatography/mass spectrometry (GC/MS) was performed on an Agilent GC/MS 5975 Turbo system. EPR spectra were obtained on a Bruker EleXsys E-500 CW-EPR spectrometer. Spectra were measured as frozen toluene glasses at liquid He temperatures at a microwave power of 0.6325–2 mW. Spectral simulations incorporating spin state, rhombicity, and zero field splitting were performed using EasySpin.<sup>7</sup> UV/Visible spectra were recorded on a Varian Cary 50 UV/Visible spectrometer using a 0.1 cm quartz cuvette and a scan rate of 600 nm/ min. Elemental analyses were carried out on a Perkin Elmer 2400 Series II CHNS/O analyzer. IR spectra were obtained on a Varian Scimitar 1000 FT-IR spectrometer using a KBr liquid IR-cell with a path length of 0.1 mm.

## Metal Complexes Syntheses.

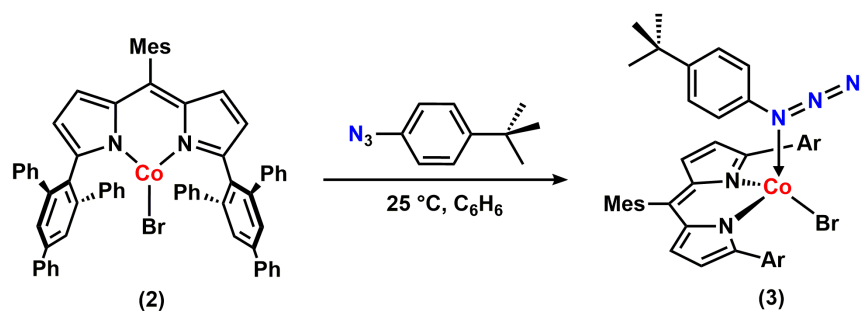

(<sup>Ar</sup>L)CoBr(N<sub>3</sub>(C<sub>6</sub>H<sub>4</sub>-*p*-<sup>t</sup>Bu)), (**3**): In an oven-dried 20 mL vial, a solution of (<sup>Ar</sup>L)CoBr (**2**) (50 mg, 0.05 mmol, 1.0 equiv) in benzene was added to a benzene solution of 1-azido-4-(*tert*-butyl)benzene (1.0 equiv) to observe an immediate color change from purple to reddish purple. The solution was lyophilized to afford **3** as a purple powder (53 mg, 90%). <sup>1</sup>H NMR (600 MHz, C<sub>6</sub>D<sub>6</sub>): δ/ppm 77.54 (s), 24.12 (s), 21.05 (s), 14.62 (s), 11.81 (s), 11.20 (s), 10.78 (s), -0.71 (s), -16.64 (s), -28.07 (s). Anal. Calc. for C<sub>76</sub>H<sub>62</sub>BrCoN<sub>5</sub>: C 77.08, H 5.28, N 5.91; Found: C 77.10, H 5.39, N 5.87. Crystals suitable for X-ray diffraction were grown from a *n*-pentane:toluene solution at -35 °C.

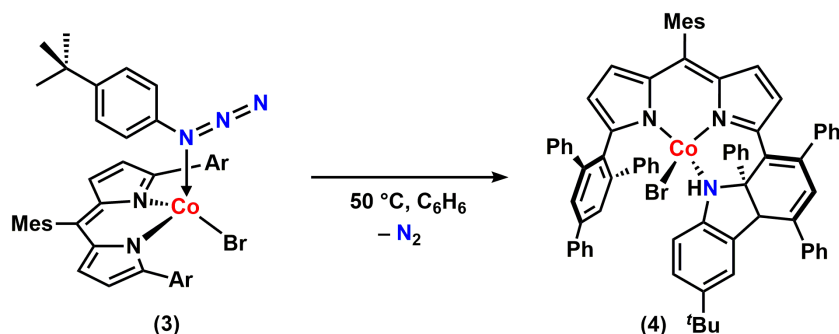

(<sup>Ar</sup>L)CoBr([3+2]annulation) (**4**): A benzene solution of **3** (50 mg, 0.042 mmol) was heated to 50 °C in a J. Young NMR tube for 20 hours to yield a blue-purple solution. Alternatively, a solution of **3** in benzene was stirred at room temperature for 3 days to afford **4** quantitatively. The solution was lyophilized to afford **4** as a purple powder (45 mg, 93%). <sup>1</sup>H NMR (600 MHz, C<sub>6</sub>D<sub>6</sub>): δ/ppm 68.00 (s), 55.54 (s), 29.68 (s), 26.35 (s), 20.67 (s), 14.11 (s), 13.12 (s), 10.89 (s), 10.18 (s), 9.32 (s), 8.56 (s), 5.76 (s), 5.00 (s), 4.28 (s), -5.40 (s), -5.92 (s), -9.28 (s), -10.88 (s). Anal. Calc. for C<sub>76</sub>H<sub>62</sub>BrCoN<sub>3</sub>: C 78.95, H 5.41, N 3.63; Found: C 79.05, H 5.35, N 3.70. Crystals suitable for X-ray diffraction were grown from a *n*-hexane:benzene solution at -35 °C.

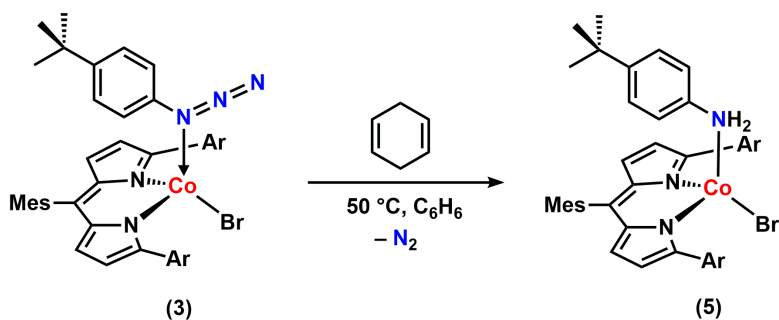

**(<sup>Ar</sup>L)CoBr(NH<sub>2</sub>(C<sub>6</sub>H<sub>4</sub>-*p*-<sup>t</sup>Bu)), (5):** In an oven-dried 20 mL vial, a benzene solution of **3** (50 mg, 0.042 mmol, 1.0 equiv) was added to an excess amount of 1,4-cyclohexadiene (5.0 equiv) and the mixture was transferred to a J. Young NMR tube and heated to 50 °C for 12 hours. The solution was lyophilized to yield **5** as a reddish-purple powder (43 mg, 87%). <sup>1</sup>H NMR (600 MHz, C<sub>6</sub>D<sub>6</sub>): δ/ppm 56.99 (s), 40.57 (s), 20.61 (s), 13.86 (s), 10.92 (s), 9.64 (s), -1.37 (s), -6.50 (s), -34.39 (s). Anal. Calc. for C<sub>76</sub>H<sub>64</sub>BrCoN<sub>3</sub>: C 78.81, H 5.57, N 3.63; Found: C 78.52, H 5.99, N 3.69. Crystals suitable for X-ray diffraction were grown from a *n*-hexane:benzene solution at room temperature.

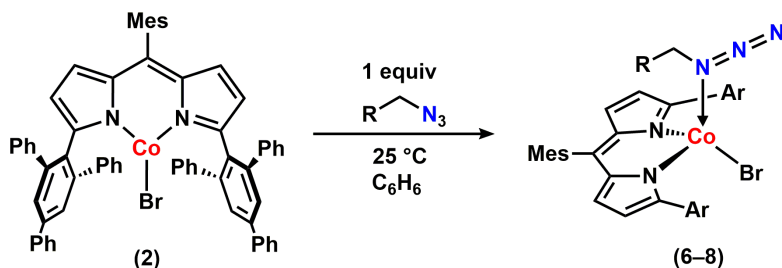

**General procedure:** In an oven-dried 20 mL vial, a diluted solution of alkyl azide (1.0 equiv) in benzene was added to a stirring solution of (<sup>Ar</sup>L)CoBr (**2**) (50 mg, 0.05 mmol 1.0 equiv) to observe an immediate color change from purple to reddish purple. The solution was lyophilized to afford the corresponding azide adduct as a purple powder.

**(<sup>Ar</sup>L)CoBr(N<sub>3</sub>CH<sub>2</sub>R), R = Ph (6):** 51 mg, 91%. <sup>1</sup>H NMR (600 MHz, C<sub>6</sub>D<sub>6</sub>): δ/ppm 66.33 (s), 64.75 (s), 16.19 (s), 8.69 (s), -0.38 (s), -2.04 (s). Anal. Calc. for C<sub>73</sub>H<sub>56</sub>BrCoN<sub>5</sub>: C 76.77, H 4.94, N 6.13; Found: C 76.25, H 5.10, N 6.45.

**(<sup>Ar</sup>L)CoBr(N<sub>3</sub>CH<sub>2</sub>R), R = (CH<sub>2</sub>)<sub>3</sub>(C<sub>6</sub>H<sub>5</sub>) (7):** 53 mg, 90%. <sup>1</sup>H NMR (500 MHz, C<sub>6</sub>D<sub>6</sub>): δ/ppm 65.48 (s), 29.40 (s), 17.48 (s), 9.27 (s), 8.79 (s), 6.30 (s), 4.95 (s), -2.00 (s), -24.71 (s). Anal.



Calc. for  $C_{76}H_{62}BrCoN_5$ : C 77.08, H 5.28, N 5.91; Found: C 77.00, H 5.35, N 5.60. Crystals suitable for X-ray diffraction were grown from a *n*-hexane:benzene solution at room temperature.

$(^{Ar}L)CoBr(N_3CH_2R)$ ,  $R = (CH_2)_2CH(CH_3)_2$  (**8**): 53 mg, 95 %.  $^1H$  NMR (600 MHz,  $C_6D_6$ ):  $\delta$ /ppm 65.01 (s), 62.36 (s), 30.92 (s), 16.85 (s), 8.62 (s), 8.29 (s), 2.24 (s), -1.85 (s), -22.72 (s). Anal. Calc. for  $C_{72}H_{62}BrCoN_5$ : C 76.12, H 5.50, N 6.16; Found: C 75.80, H 5.19, N 5.46. Crystals suitable for X-ray diffraction were grown from a *n*-hexane:benzene solution at room temperature.

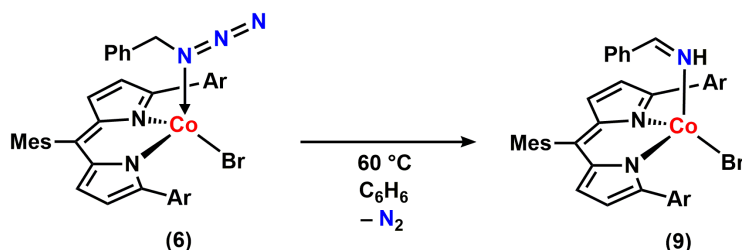

$(^{Ar}L)CoBr(NHCHC_6H_5)$  (**9**): A benzene solution of **6** (50 mg, 0.044 mmol) was heated to 60 °C for 24 hours in a J. Young NMR tube. The solution was lyophilized to afford **9** as a purple powder (42 mg, 87%).  $^1H$  NMR (600 MHz,  $C_6D_6$ ):  $\delta$ /ppm 55.98 (s), 33.15 (s), 11.19 (s), 10.55 (s), 4.72 (s), 4.53 (s), 0.65 (s), -2.94 (s). Anal. Calc. for  $C_{73}H_{56}BrCoN_3$ : C 78.70, H 5.07, N 3.77; Found: C 79.05, H 4.89, N 4.02. Crystals suitable for X-ray diffraction were grown from a *n*-pentane:toluene solution at room temperature.

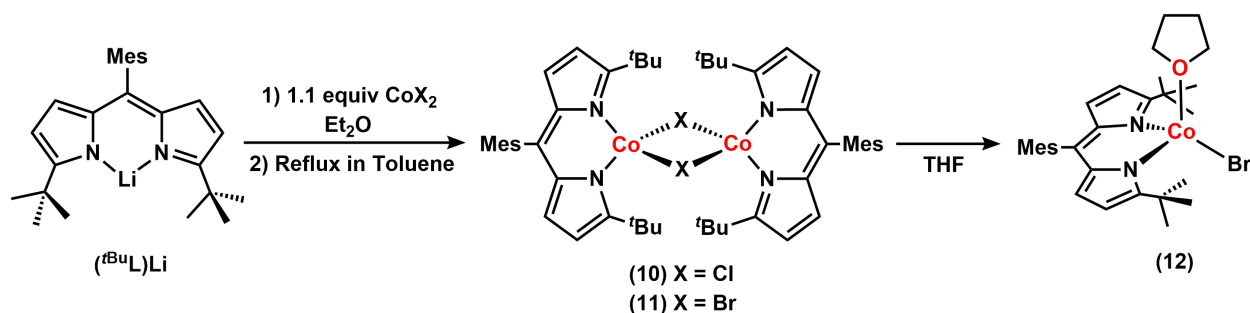

**General procedure:** In an oven-dried 20 mL vial, anhydrous  $\text{CoX}_2$  (X = Cl or Br, 1.1 equiv) was dissolved in 3 mL of diethyl ether. The vial was placed in a liquid nitrogen-cooled cold well until frozen. In a separate vial,  $(t\text{BuL})\text{Li}$  (0.2 g, 0.53 mmol, 1.0 equiv) was dissolved in 6 mL of diethyl ether and added to the thawing slurry of  $\text{CoX}_2$ . The reaction mixture was stirred for 4 hours at room temperature. The dark brown mixture was filtered through a coarse glass frit with Celite to remove lithium salts and excess cobalt halide, followed by washing with diethyl ether. The filtrate was concentrated *in vacuo*, redissolved in benzene, and filtered through a medium porosity glass frit with Celite. The Celite was washed with an additional 20 mL benzene and the filtrate was lyophilized. The dried powder was refluxed in toluene for 30 min to yield a bright red solution. The solvent was then removed *in vacuo* while heating. The dried material was dissolved in benzene and the solution was lyophilized to yield the corresponding dimeric species as a red powder.

**$[(t\text{BuL})\text{CoCl}]_2$  (10):** 210 mg, 85%.  $^1\text{H NMR}$  (600 MHz,  $\text{C}_6\text{D}_6$ ):  $\delta$ /ppm 80.63 (s), 35.77 (s), 1.25 (s), -15.60 (s). Anal. Calc. for  $\text{C}_{52}\text{H}_{66}\text{Cl}_2\text{Co}_2\text{N}_4$ : C 66.74, H 7.11, N 5.99; Found: C 66.95, H 6.75, N 5.85.

**$[(t\text{BuL})\text{CoBr}]_2$ , (11):** 245 mg, 91%.  $^1\text{H NMR}$  (600 MHz,  $\text{C}_6\text{D}_6$ ):  $\delta$ /ppm 79.85 (s), 33.09 (s), -13.93. Anal. Calc. for  $\text{C}_{52}\text{H}_{66}\text{Br}_2\text{Co}_2\text{N}_4$ : C 60.95, H 6.49, N 5.47; Found: C 70.10, H 6.90, N 5.60. Crystals suitable for X-ray diffraction were grown from a *n*-hexane/benzene mixture at room temperature.

**$(t\text{BuL})\text{CoBr}(\text{thf})$ , (12):** In an oven-dried 20 mL vial, **11** (20 mg, 0.02 mmol) was dissolved in 3 mL of THF to afford a dark brown solution. The THF was removed *in vacuo* and the dried material was redissolved in benzene and lyophilized to yield **12** as a green powder (22 mg, 97%).  $^1\text{H NMR}$  (600 MHz,  $\text{C}_6\text{D}_6$ ):  $\delta$ /ppm 64.17 (s), 41.27 (s), 11.08 (s), 9.40 (s), 4.93 (s), 3.52 (s), 2.19 (s), 1.35 (s). Anal. Calc. for  $\text{C}_{30}\text{H}_{41}\text{BrCoN}_2\text{O}$ : C 61.65, H 7.07, N 4.79; Found: C 61.30, H 6.95, N 4.55.

Crystals suitable for X-ray diffraction were grown from a *n*-hexane/THF mixture at room temperature.

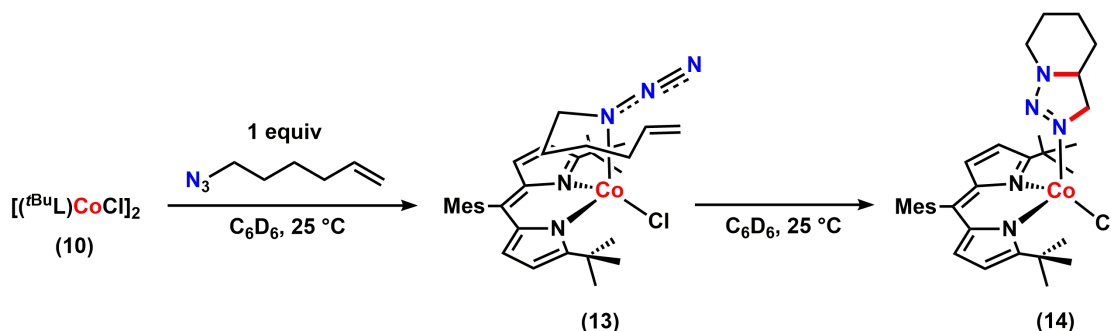

**(<sup>t</sup>BuL)CoX(N<sub>3</sub>R), R = (CH<sub>2</sub>)<sub>4</sub>(C<sub>2</sub>H<sub>3</sub>):** In an oven-dried 20 mL vial, a benzene solution of 6-azido-1-hexene (1.0 equiv per Co center) was added to a stirring solution of **10** or **11** (0.02 mmol) in benzene at room temperature to observe an immediate color change from red to brown. Owing to the rapid conversion to the corresponding triazole bound species, the azide bound complex **13** could not be isolated. **X = Br:** <sup>1</sup>H NMR (600 MHz, C<sub>6</sub>D<sub>6</sub>): δ/ppm 70.40 (s), 41.74 (s), 18.86 (s), 10.78 (s), 4.34 (s), 1.37 (s), -0.17 (s), -3.07 (s), -5.14 (s), -30.57 (s).

**(<sup>t</sup>BuL)CoCl(1,2,3-dihydrotriazole) (14):** A benzene solution of **13** (prepared *in situ* following the procedure described above using **10** (20 mg)) was stirred at room temperature for 1 hour. The solution was lyophilized to afford **14** as a brown powder (17 mg, 87%). <sup>1</sup>H NMR (600 MHz, C<sub>6</sub>D<sub>6</sub>): δ/ppm 61.44 (s), 32.52 (s), 27.04 (s), 19.98 (s), 9.30 (s), 3.79 (s), 1.34 (s), -2.83 (s). Anal. Calc. for C<sub>32</sub>H<sub>44</sub>ClCoN<sub>5</sub>: C 64.80, H 7.48, N 11.81; Found: C 65.05, H 7.75, N 12.02.

**(<sup>t</sup>BuL)CoBr(1,2,3-dihydrotriazole):** 24 mg, 95%. <sup>1</sup>H NMR (600 MHz, C<sub>6</sub>D<sub>6</sub>): δ/ppm 62.91 (s), 60.45 (s), 60.28 (s), 31.00 (s), 28.95 (s), 24.86 (s), 9.73 (s), 9.00 (s), 5.92 (s), 3.84 (s), 1.34 (s), -3.69 (s). Anal. Calc. for C<sub>32</sub>H<sub>44</sub>BrCoN<sub>5</sub>: C 60.28, H 6.96, N 10.98; Found: C 60.45, H 7.05, N 11.10. Crystals suitable for X-ray diffraction were grown from a *n*-hexane:benzene solution at room temperature.

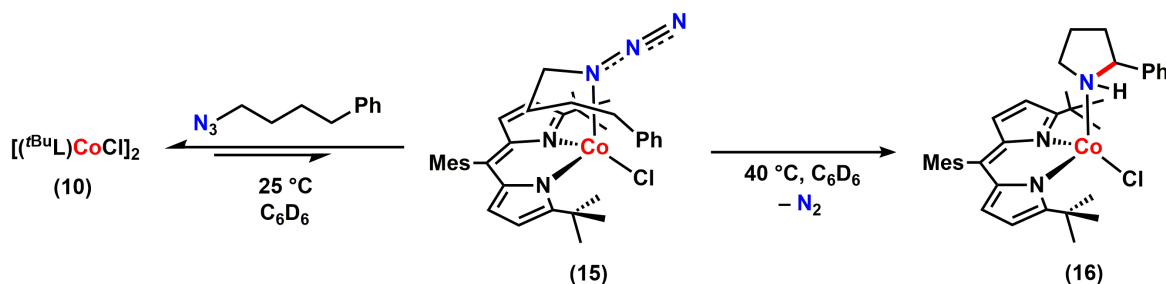

**(<sup>t</sup>BuL)CoX(N<sub>3</sub>R)**, **R = (CH<sub>2</sub>)<sub>4</sub>(C<sub>6</sub>H<sub>5</sub>)**: In an oven-dried 20 mL vial, a benzene solution of (4-azidobutyl)benzene (1.0 equiv per Co center) was added to a stirring solution of **10** or **11** (0.02 mmol) in benzene at room temperature to observe an immediate color change from red to brown. Owing to a greater driving force to regenerate the dimeric species (**10** or **11**) during crystallization, the azide adduct complex was not isolable in the solid state. **X = Cl (15)**: <sup>1</sup>H NMR (600 MHz, C<sub>6</sub>D<sub>6</sub>): δ/ppm 66.39 (s), 47.19 (s), 8.92 (s), 8.30 (s), 6.95 (s), 6.50 (s), 4.48 (s), 2.14 (s), 1.40 (s), 1.31 (s), -0.88 (s), -0.54 (s), -1.70 (s), -15.98 (s), -32.26 (s). **X = Br**: <sup>1</sup>H NMR (600 MHz, C<sub>6</sub>D<sub>6</sub>): δ/ppm 76.33 (s), 35.62 (s), 5.188 (s), 3.86 (s), 1.74 (s), 1.35 (s), 0.88 (s), -1.78 (s), -2.83 (s).

**(<sup>t</sup>BuL)CoCl(2-phenylpyrrolidine) (16)**: A benzene solution of **15** (prepared following the procedure described above using **10** (20 mg)) was heated to 40 °C for 24 hours in a J. Young NMR tube. The solution was lyophilized to afford **16** as a brown powder (23 mg, 89%). <sup>1</sup>H NMR (600 MHz, C<sub>6</sub>D<sub>6</sub>): δ/ppm 62.91 (s), 60.45 (s), 60.28 (s), 31.00 (s), 28.95 (s), 24.86 (s), 9.73 (s), 9.00 (s), 5.92 (s), 3.84 (s), 1.34 (s), -3.69 (s).

**(<sup>t</sup>BuL)CoBr(2-phenylpyrrolidine)**: 21 mg, 84%. <sup>1</sup>H NMR (600 MHz, C<sub>6</sub>D<sub>6</sub>): δ/ppm 62.91 (s), 60.45 (s), 60.28 (s), 31.00 (s), 28.95 (s), 24.86 (s), 9.73 (s), 9.00 (s), 5.92 (s), 3.84 (s), 1.34 (s), -3.69 (s). Anal. Calc. for C<sub>36</sub>H<sub>46</sub>BrCoN<sub>3</sub>: C 65.55, H 7.03, N 6.37; Found: C 65.27, H 7.22, N 5.98. Crystals suitable for X-ray diffraction were grown from a *n*-hexane:benzene solution at room temperature.

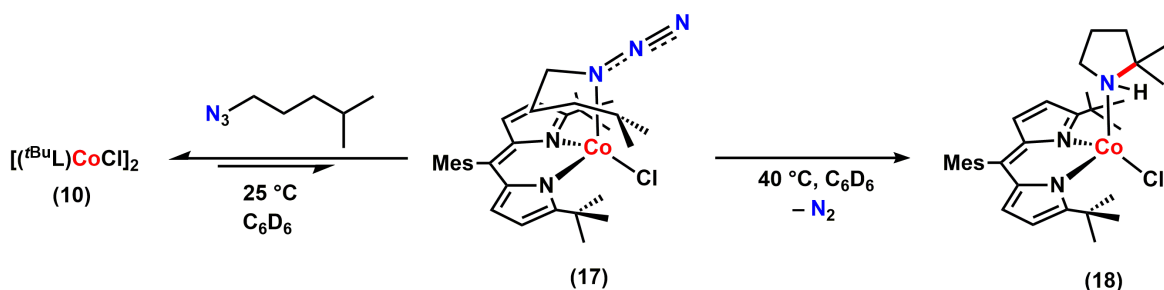

**(<sup>t</sup>BuL)CoX(N<sub>3</sub>R), R = (CH<sub>2</sub>)<sub>3</sub>CH(CH<sub>3</sub>)<sub>2</sub> (17):** In an oven-dried 20 mL vial, a benzene solution of 1-azido-4-methylpentane (1.0 equiv per Co center) was added to a stirring solution of **10** or **11** (0.02 mmol) in benzene at room temperature to observe an immediate color change from red to brown. Owing to a greater driving force to regenerate the dimeric species (**10** or **11**) during crystallization, the azide-bound complex was not isolable in the solid state. **X = Cl (17):** <sup>1</sup>H NMR (600 MHz, C<sub>6</sub>D<sub>6</sub>): δ/ppm 67.00 (s), 46.95 (s), 9.68 (s), 8.28 (s), 4.68 (s), 2.14 (s), 1.31 (s), -0.11 (s), -1.21 (s), -1.91 (s), -32.15 (s). **X = Br:** <sup>1</sup>H NMR (600 MHz, C<sub>6</sub>D<sub>6</sub>): δ/ppm 75.68 (s), 36.26 (s), 9.96 (s), 3.86 (s), 1.74 (s), 1.35 (s), 0.89 (s), -0.45 (s), -2.66 (s), -4.11 (s), -11.14 (s).

**(<sup>A</sup>rL)CoCl(2,2-dimethylpyrrolidine) (18):** A benzene solution of **17** (prepared following the procedure described above using **10** (20 mg)) was heated to 40 °C for 24 hours in a J. Young NMR tube. The solution was lyophilized to afford **18** as a brown powder (21 mg, 86%). <sup>1</sup>H NMR (600 MHz, C<sub>6</sub>D<sub>6</sub>): δ/ppm 62.91 (s), 60.45 (s), 60.28 (s), 31.00 (s), 28.95 (s), 24.86 (s), 9.73 (s), 9.00 (s), 5.92 (s), 3.84 (s), 1.34 (s), -3.69 (s). Anal. Calc. for C<sub>34</sub>H<sub>46</sub>ClCoN<sub>3</sub>: C 67.77, H 8.18, N 7.41; Found: C 67.53, H 8.35, N 7.78. Crystals suitable for X-ray diffraction were grown from a *n*-hexane:benzene solution at room temperature.

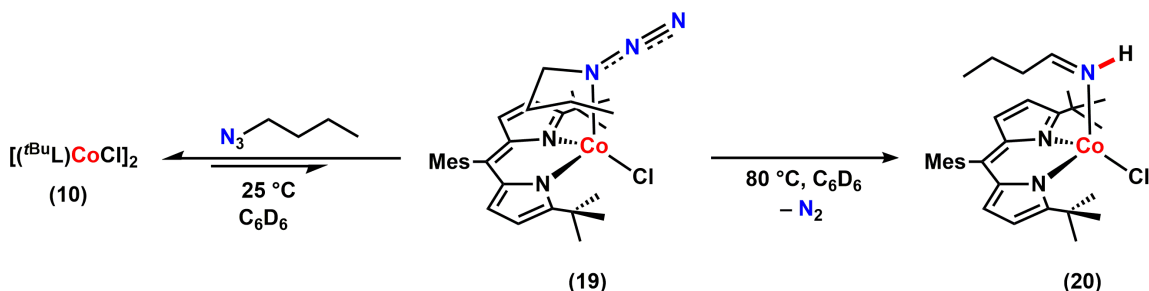

**(<sup>t</sup>BuL)CoX(N<sub>3</sub>R), R = (CH<sub>2</sub>)<sub>3</sub>CH<sub>3</sub> (19):** In an oven-dried 20 mL vial, a benzene solution of 1-azidobutane (1.0 equiv per Co center) was added to a stirring solution of **10** or **11** (0.02 mmol) in benzene at room temperature to observe an immediate color change from red to brown. Owing to

a greater driving force to regenerate the dimeric species (**10** or **11**) during crystallization, the azide-bound complex was not isolable in the solid state. **X = Cl (19)**:  $^1\text{H NMR}$  (600 MHz,  $\text{C}_6\text{D}_6$ ):  $\delta/\text{ppm}$  66.87 (s), 46.77 (s), 10.93 (s), 8.94 (s), 4.60 (s), 2.14 (s), 1.31 (s), -0.19 (s), -0.76 (s), -1.66 (s), -31.94 (s). **X = Br**:  $^1\text{H NMR}$  (600 MHz,  $\text{C}_6\text{D}_6$ ):  $\delta/\text{ppm}$  76.10 (s), 35.62 (s), 9.58 (s), 7.86 (s), 5.18 (s), 3.77 (s), 1.71 (s), -0.74 (s), -2.04 (s), -3.71 (s), -11.13 (s).

( $^{\text{tBu}}\text{L}$ )CoCl(NHR), **R = (CH)(CH<sub>2</sub>)<sub>2</sub>CH<sub>3</sub> (20)**: A benzene solution of **19** (prepared following the procedure described above using **10** (20 mg)) was heated to 80 °C for 24 hours in a J. Young NMR tube. The solution was lyophilized to afford **20** as a brown powder (21 mg, 91%).  $^1\text{H NMR}$  (600 MHz,  $\text{C}_6\text{D}_6$ ):  $\delta/\text{ppm}$  190.00 (s), 152.71 (s), 61.69 (s), 60.60 (s), 31.52 (s), 30.13 (s), 27.05 (s), 16.66 (s), 3.88 (s), 1.37 (s), -2.38 (s), -9.58 (s). Anal. Calc. for  $\text{C}_{30}\text{H}_{42}\text{ClCoN}_3$ : C 66.84, H 7.85, N 7.80; Found: C 66.50, H 9.01, N 8.15.

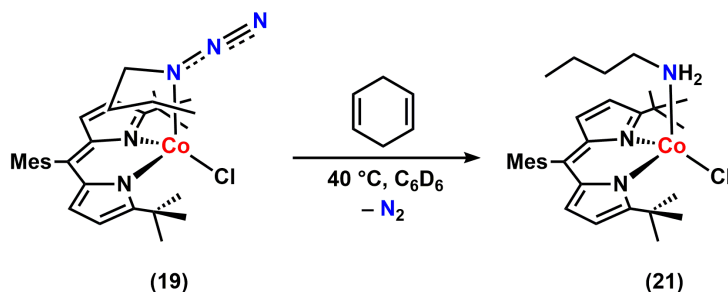

( $^{\text{tBu}}\text{L}$ )CoCl(NH<sub>2</sub>R), **R = (CH<sub>2</sub>)<sub>3</sub>CH<sub>3</sub> (21)**: In an oven-dried 20 mL vial, a benzene solution of 1-azidobutane (1.0 equiv per Co center) was added to a stirring solution of **10** (20 mg). To the stirring mixture, excess amount of 1,4-cyclohexadiene (10 equiv) was added. The mixture was transferred to a J. Young NMR tube and heated to 40 °C for 24 hours to observe a new paramagnetic species (**21**) by  $^1\text{H NMR}$  spectroscopy. The authentic **21** can be prepared from **10** and a stoichiometric amount of butan-1-amine in benzene at room temperature. The dark brown mixture was lyophilized to afford **21** as a brown powder in quantitative yield (Figure S-9).  $^1\text{H NMR}$  (600 MHz,  $\text{C}_6\text{D}_6$ ):  $\delta/\text{ppm}$  61.83 (s), 31.67 (s), 29.77 (s), 8.96 (s), 5.65 (s), 3.59 (s), 0.39 (s), -0.30 (s). Anal. Calc. for  $\text{C}_{30}\text{H}_{44}\text{ClCoN}_3$ : C 66.59, H 8.20, N 7.77; Found: C 66.90, H 7.92, N 7.45. Crystals suitable for X-ray diffraction were grown from a *n*-hexane:benzene solution at room temperature.

Non-Covalent Interaction Analysis.<sup>8-9</sup>

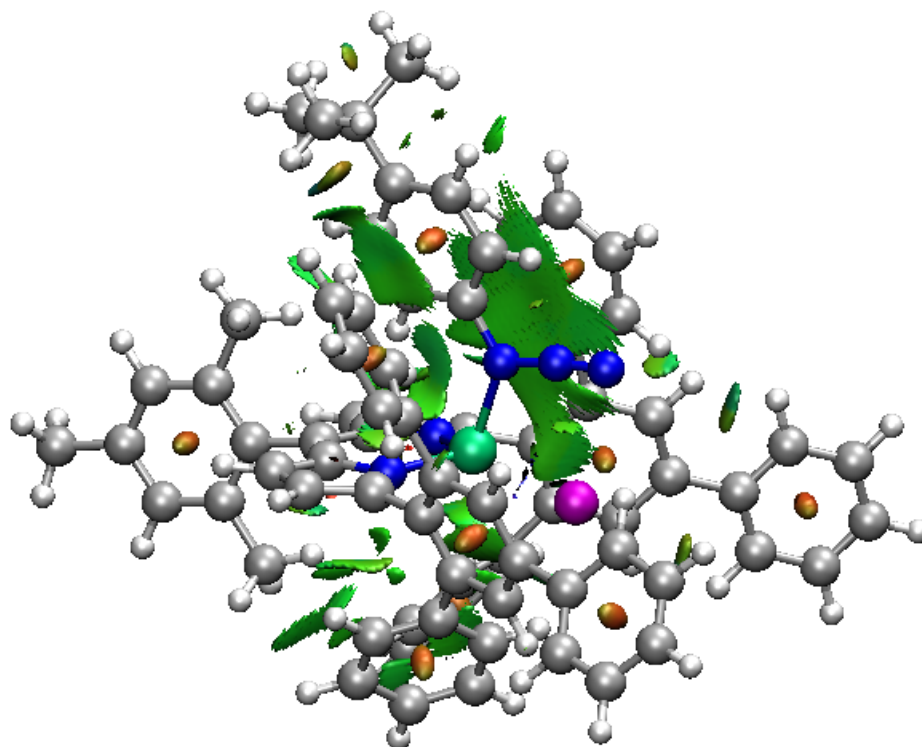

Figure S-1. Non-covalent interaction plot for 3.

## Stoichiometric Reactions.

### Reaction with cyclohexene.

To a stirring solution of **2** (20 mg, 0.02 mmol) in 0.7 mL of cyclohexene, a solution of 1-azido-4-(*tert*-butyl)benzene (1.0 equiv, 0.02 mmol) diluted in 0.3 mL of cyclohexene was added and allowed to stir at room temperature for 24 hours under an inert N<sub>2</sub> atmosphere. The reaction was removed from the glove box, concentrated *in vacuo*, and ran through a neutral alumina gel eluting with a 10:1 mixture of dichloromethane and methanol to remove paramagnetic materials. <sup>1</sup>H NMR and GC-MS revealed formation of 4-(*tert*-butyl)-*N*-(cyclohex-2-en-1-yl)aniline.<sup>10</sup> The yield was determined via <sup>1</sup>H NMR integration using 1,3,5-trimethoxybenzene as an internal standard.

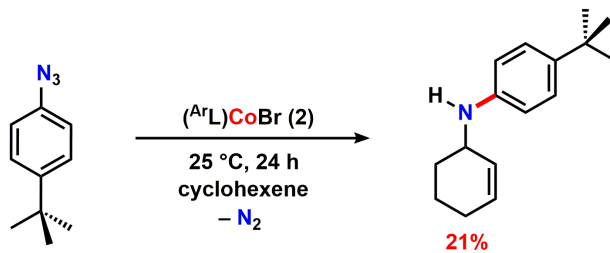



### Reaction with styrene.

To a stirring solution of **2** (20 mg, 0.02 mmol) in benzene, a solution of 1-azido-4-(*tert*-butyl)benzene (1.0 equiv, 0.02 mmol) diluted in benzene was added followed by styrene (200 equiv, 4 mmol). The reaction mixture was allowed to stir at room temperature for 24 hour. The reaction was removed from the glove box, concentrated *in vacuo*, and ran through a neutral alumina gel eluting with a 10:1 mixture of dichloromethane and methanol to remove paramagnetic materials. <sup>1</sup>H NMR and GC-MS revealed formation of 1-(4-(*tert*-butyl)phenyl)-2-phenylaziridine.<sup>11</sup> The yield was determined via <sup>1</sup>H NMR integration using 1,3,5-trimethoxybenzene as an internal standard.

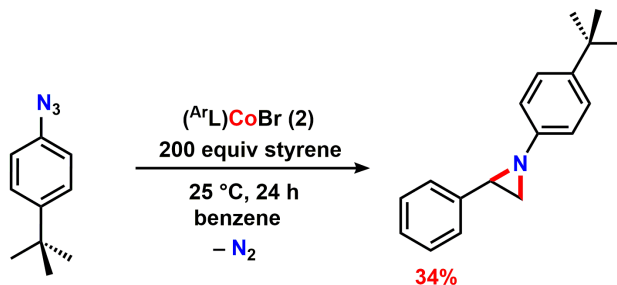

### Spectroscopic Characterization.

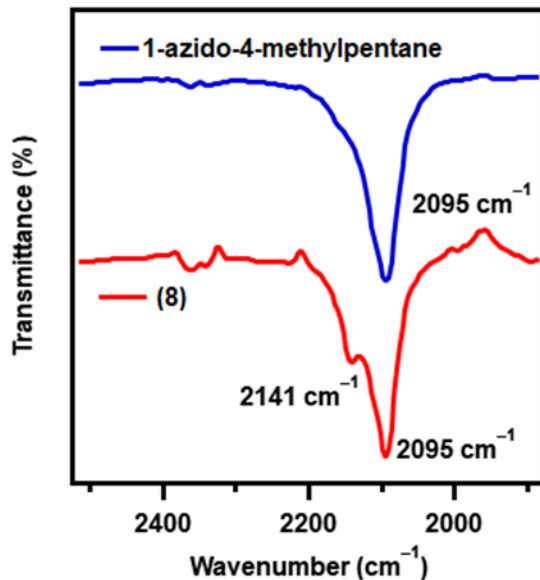

**Figure S-2.** Solution IR spectra of 1-azido-4-methylpentane and **8** in benzene in the presence of a slight excess amount of 1-azido-4-methylpentane.

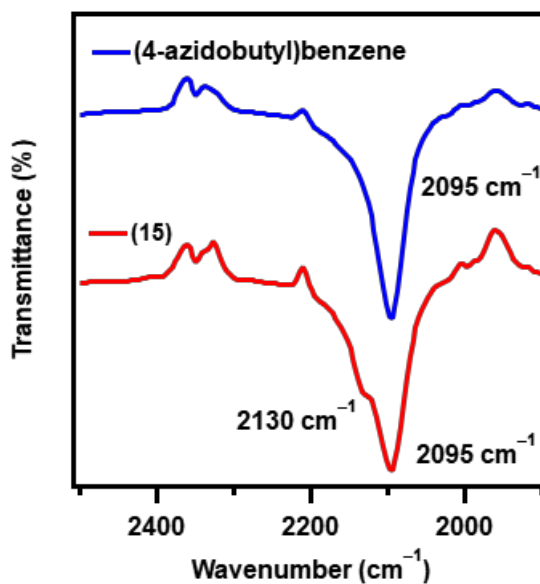

**Figure S-3.** Solution IR spectra of (4-azidobutyl)benzene and **15** in benzene in the presence of a slight excess amount of (4-azidobutyl)benzene.

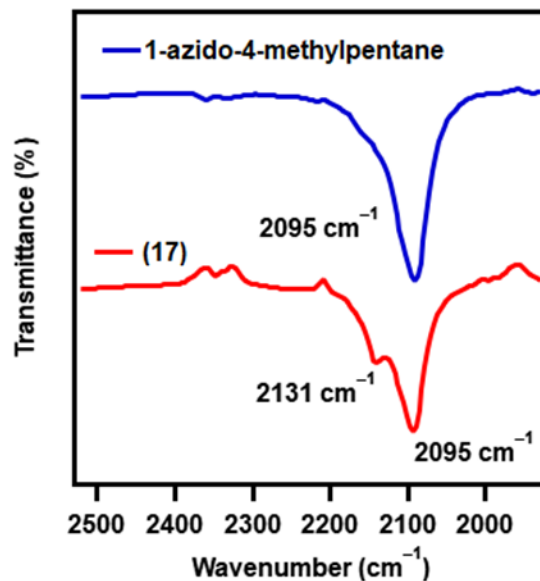

**Figure S-4.** Solution IR spectra of 1-azido-4-methylpentane and **17** in benzene in the presence of a slight excess amount of 1-azido-4-methylpentane.

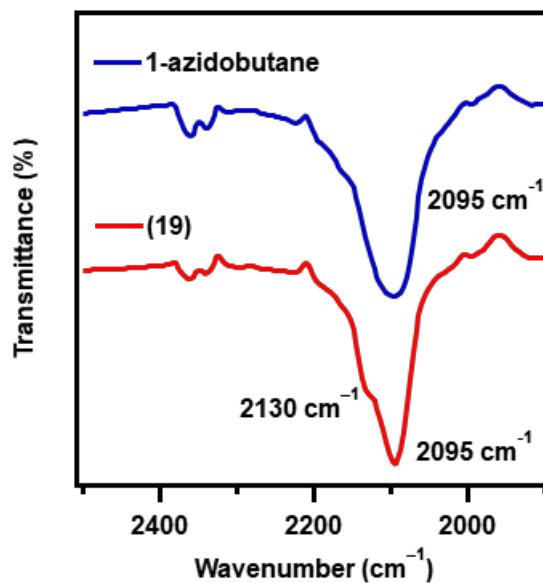

**Figure S-5.** Solution IR spectra of 1-azidobutane and **19** in benzene in the presence of a slight excess amount of 1-azidobutane.

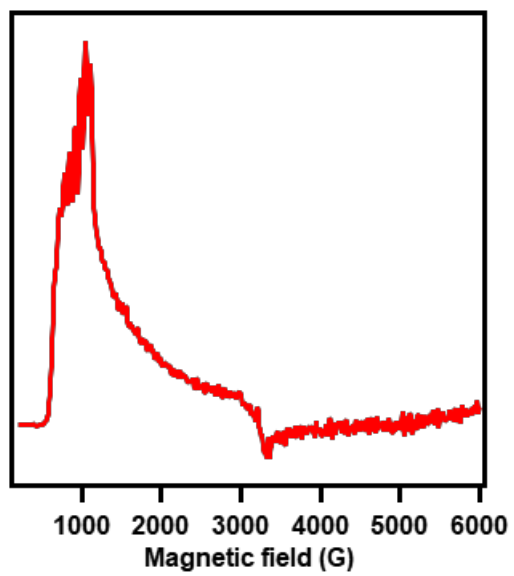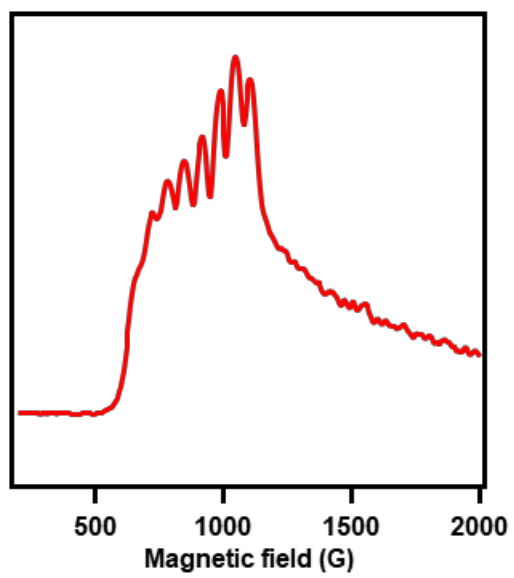

**Figure S-6.** Frozen toluene EPR spectrum of **8** at 4 K.

## Reactivity Studies on 8.

(<sup>Δ</sup>L)CoBr(N<sub>3</sub>R) (**8**) (15 mg, 0.013 mmol) was dissolved in 0.7 mL of benzene-*d*<sub>6</sub> and the solution was transferred to a J. Young NMR tube. The reaction mixture was heated to 60 °C and its progression was monitored by <sup>1</sup>H NMR spectroscopy. <sup>1</sup>H NMR chemical shifts corresponding to the proposed nitrene intermediate are colored in red and the ones for the final imine adduct are colored in blue. The final imine adduct can be crystallized at room temperature from *n*-hexane/benzene mixture, however, the obtained X-ray structure cannot be modeled owing to the intrinsic disorder of the whole molecule. Instead, upon quenching the crude reaction mixture, the bound imine readily hydrolyzes to the corresponding 4-methylpentanal as confirmed by <sup>1</sup>H NMR spectroscopy supporting the identity of the bound imine moiety.<sup>12</sup>

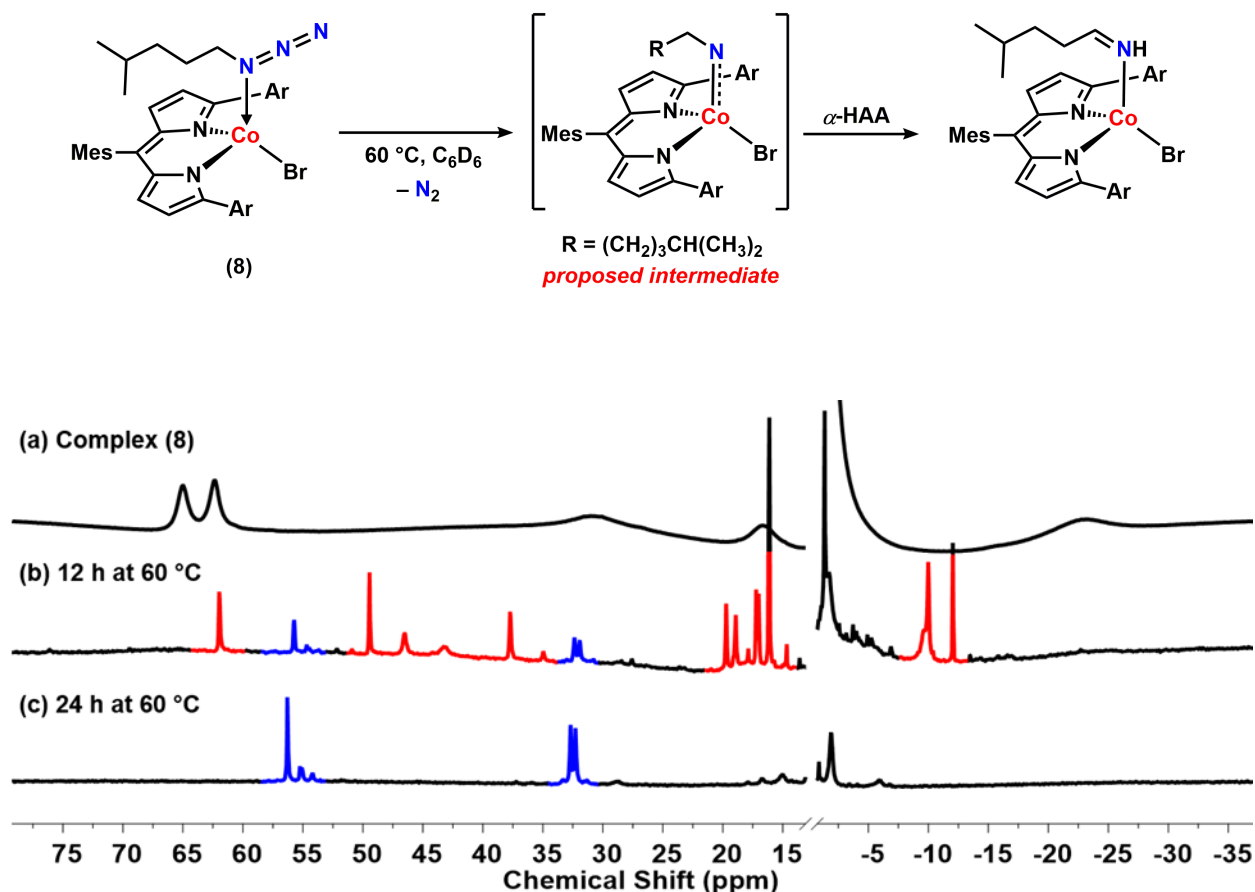

Figure S-7. Reaction progression for the conversion of **8** to the corresponding imine complex.

### Binding equilibrium between **11** and alkyl azides.

Since **11** is more soluble than **10** in benzene, we used **11** to study binding dynamics between dimeric complexes and the monomeric organoazide bound species. A solution of **11** (5 mg, 4.8  $\mu\text{mol}$  as a dimeric form) in benzene- $d_6$  was added to a solution of 1-azido-4-(*tert*-butyl)benzene (1.0 – 20 equiv) in benzene- $d_6$ . Each reaction mixture was transferred to a J. Young NMR tube and the chemical shifts were tracked by  $^1\text{H}$  NMR spectroscopy.

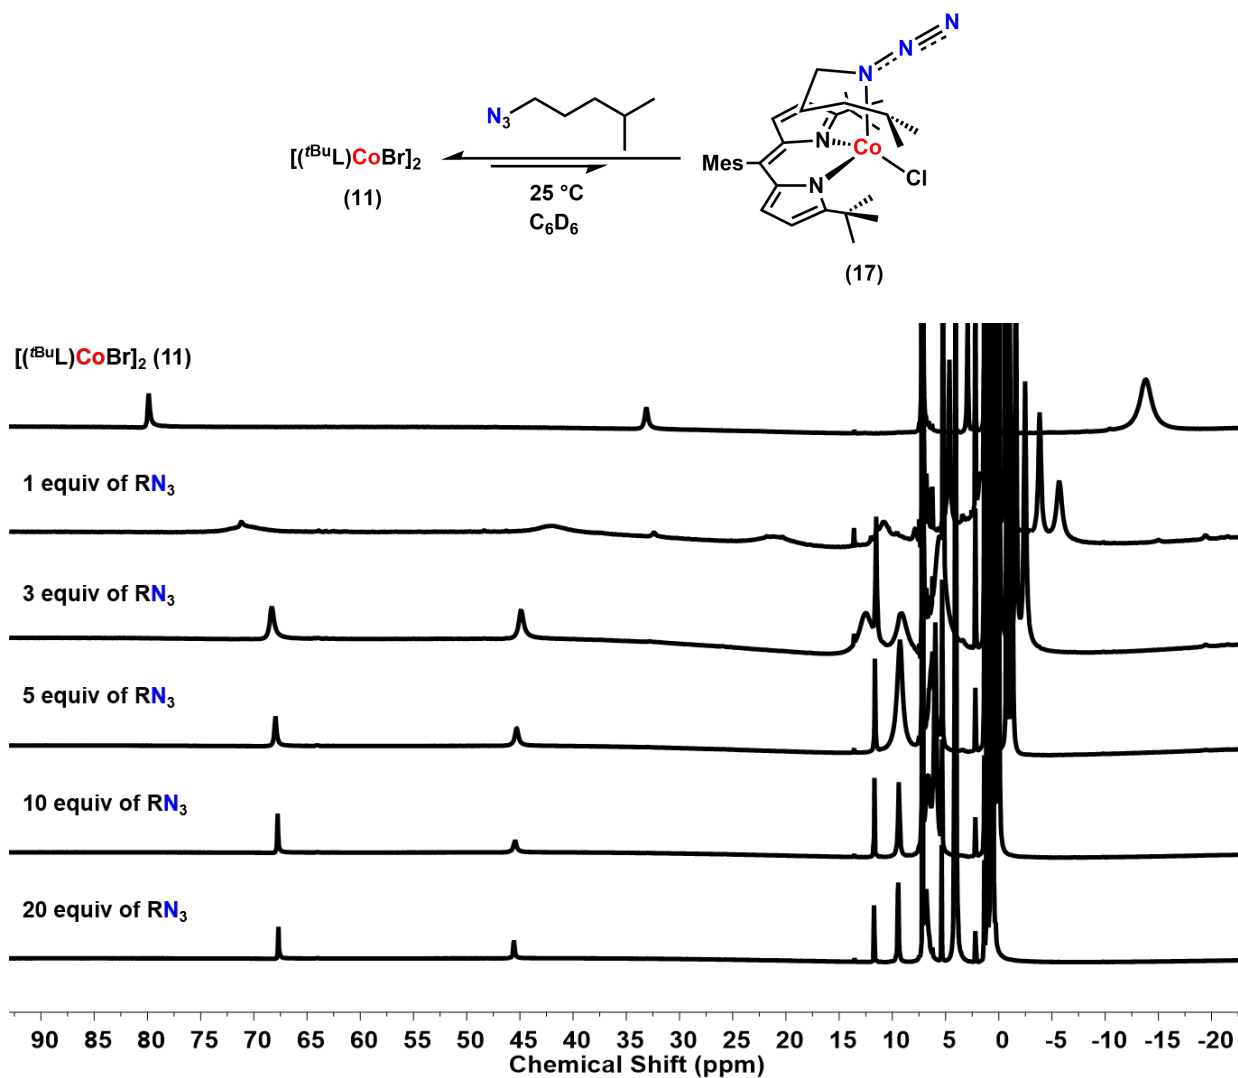

**Figure S-8.** 600 MHz  $^1\text{H}$  NMR spectra of **17** at varying concentrations of 1-azido-4-methylpentane in benzene- $d_6$  at 25 °C.

### Job plot analysis.<sup>13</sup>

Solutions of **11** and 1-azido-4-methylpentane (RN<sub>3</sub>) were prepared in benzene-*d*<sub>6</sub> and the total concentration of the mixture was maintained constant throughout the analysis. The chemical shifts corresponding to **11** as a function of the concentration of alkyl azides were measured at 25 °C.

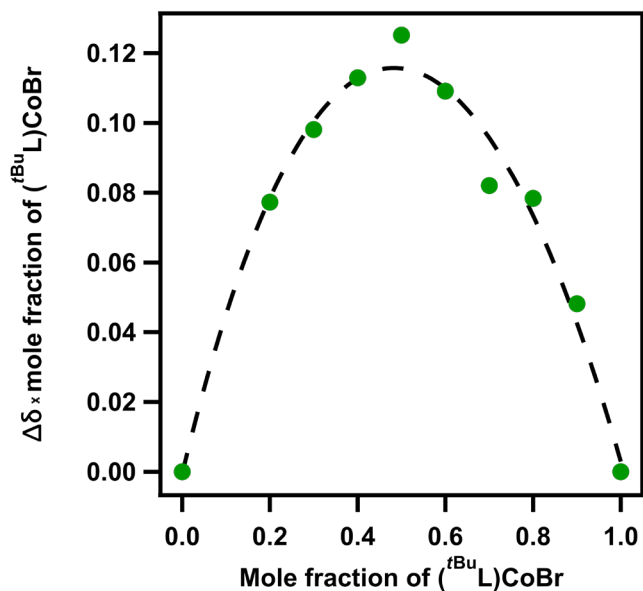

**Figure S-9.** Job plot obtained at 25 °C in benzene-*d*<sub>6</sub> with  $[\text{Co}] + [\text{RN}_3] = 8.85 \text{ mM}$ .

**Table S-1.** Chemical shifts (ppm) of **11** as a function of  $[\text{RN}_3]$  at 25 °C in benzene-*d*<sub>6</sub>.

| Entry | 2[ <b>11</b> ] (mM) | $[\text{RN}_3]$ (mM) | Chemical shift (ppm) |
|-------|---------------------|----------------------|----------------------|
| 1     | 8.85                | 0                    | 80.69                |
| 2     | 7.97                | 0.88                 | 80.63                |
| 3     | 7.08                | 1.77                 | 80.59                |
| 4     | 6.20                | 2.66                 | 80.57                |
| 5     | 5.31                | 3.54                 | 80.50                |
| 6     | 4.43                | 4.43                 | 80.44                |
| 7     | 3.54                | 5.31                 | 80.40                |
| 8     | 2.66                | 6.20                 | 80.36                |
| 9     | 1.77                | 7.08                 | 80.30                |
| 10    | 0.88                | 7.97                 | 73.71                |

### $^1\text{H}$ NMR titration.<sup>14</sup>

A solution of **11** was prepared in benzene- $d_6$  and its concentration (1.1 mM) was maintained constant throughout the titration with various alkyl azides. The chemical shifts corresponding to **11** as a function of the concentration of alkyl azide were measured at 25 °C to reveal almost identical binding affinities towards the cobalt center among three different alkyl azide substrates.

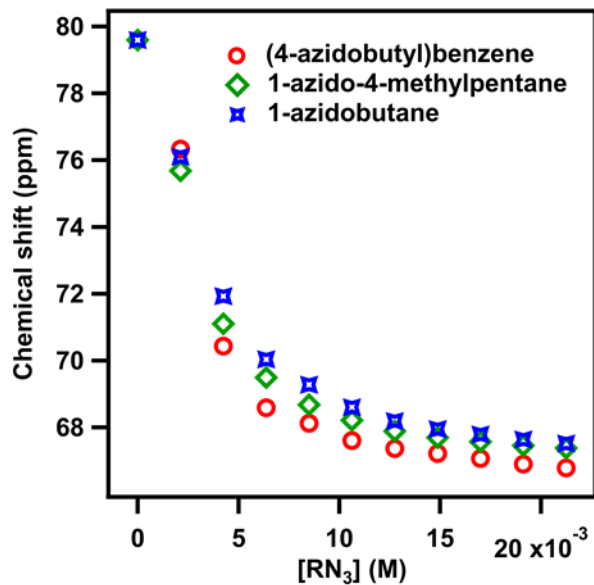

**Figure S-10.** 600 MHz  $^1\text{H}$  NMR titration curves of **11** with organoazides. Chemical shifts (ppm) for **11** as a function of concentration of each azide at 25 °C in benzene- $d_6$ .



### Reactivity studies on **19** with cyclohexene.

A solution of **19** was prepared by adding 1.0 equivalent of 1-azidobutane to **10** in benzene- $d_6$ . To the stirring solution, 10 equivalents of 1,4-cyclohexadiene was added. The reaction mixture was transferred to a J. Young NMR tube and heated to 40 °C for 24 h to observe formation of **21**.

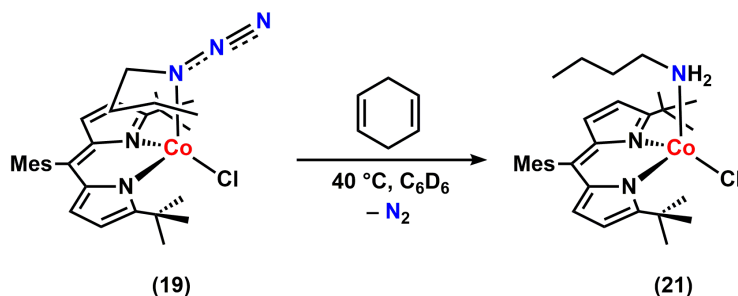

(a) Complex (**19**)

(b) Complex (**19**) + 1,4-CHD at 40 °C, 24h

(c) Complex (**21**)

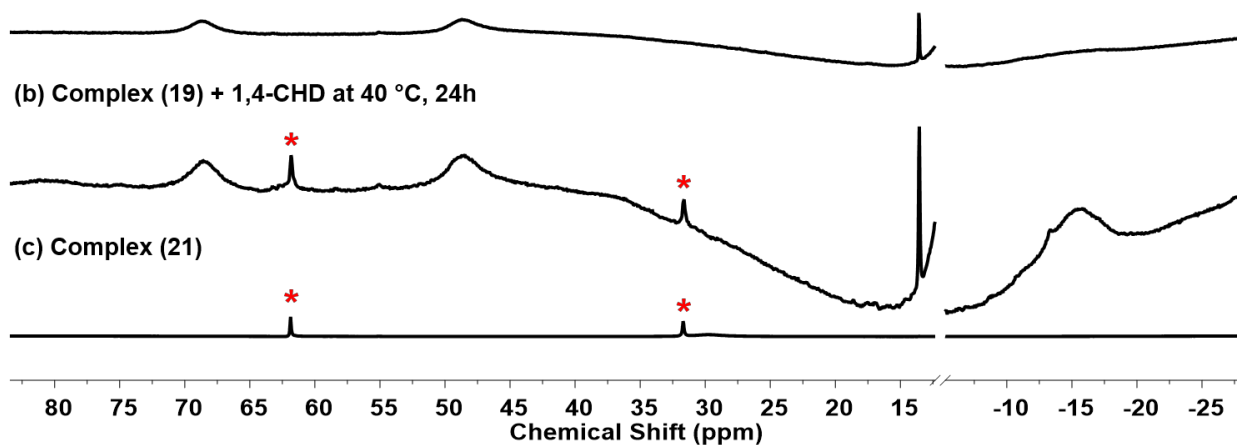

**Figure S-11.** Reaction progression for the conversion of **19** to **21** in benzene- $d_6$  at 40 °C.

## $^1\text{H}$ NMR Spectra of Metal Compounds.

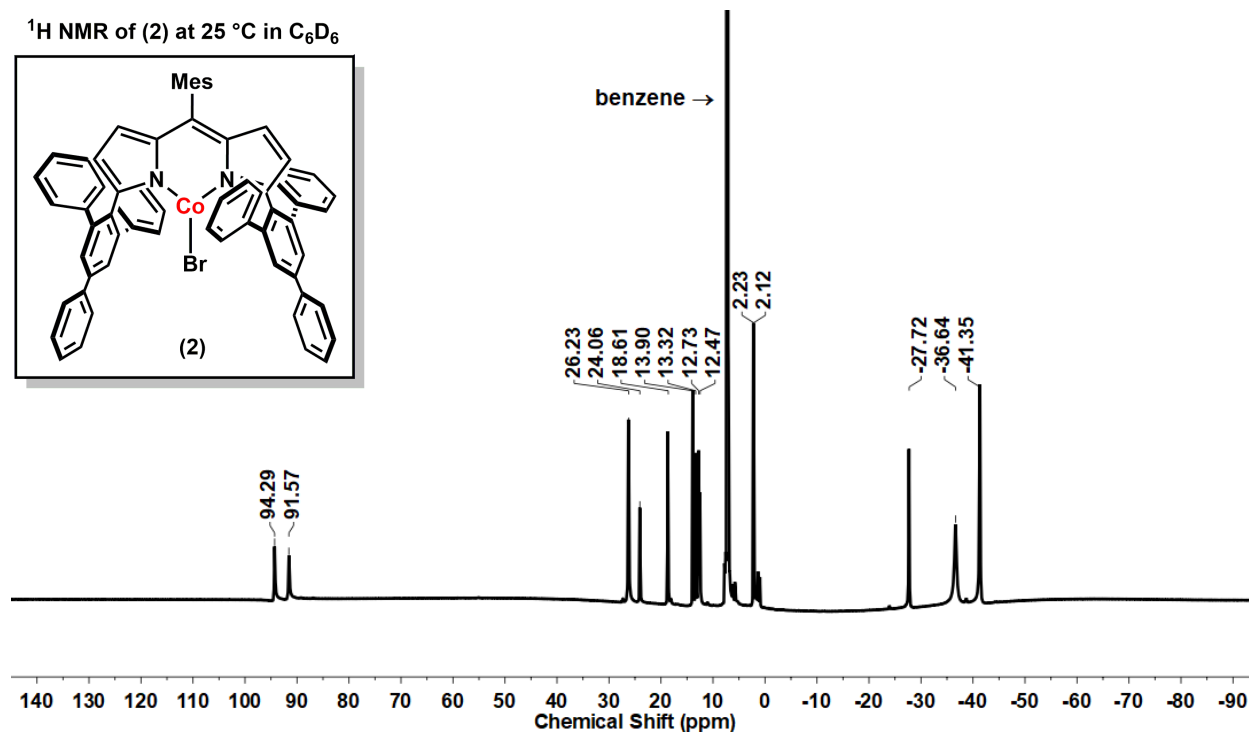

Figure S-12. 500 MHz  $^1\text{H}$  NMR spectrum of ( $^{\text{Ar}}\text{L}$ )CoBr (2) in benzene- $d_6$ .

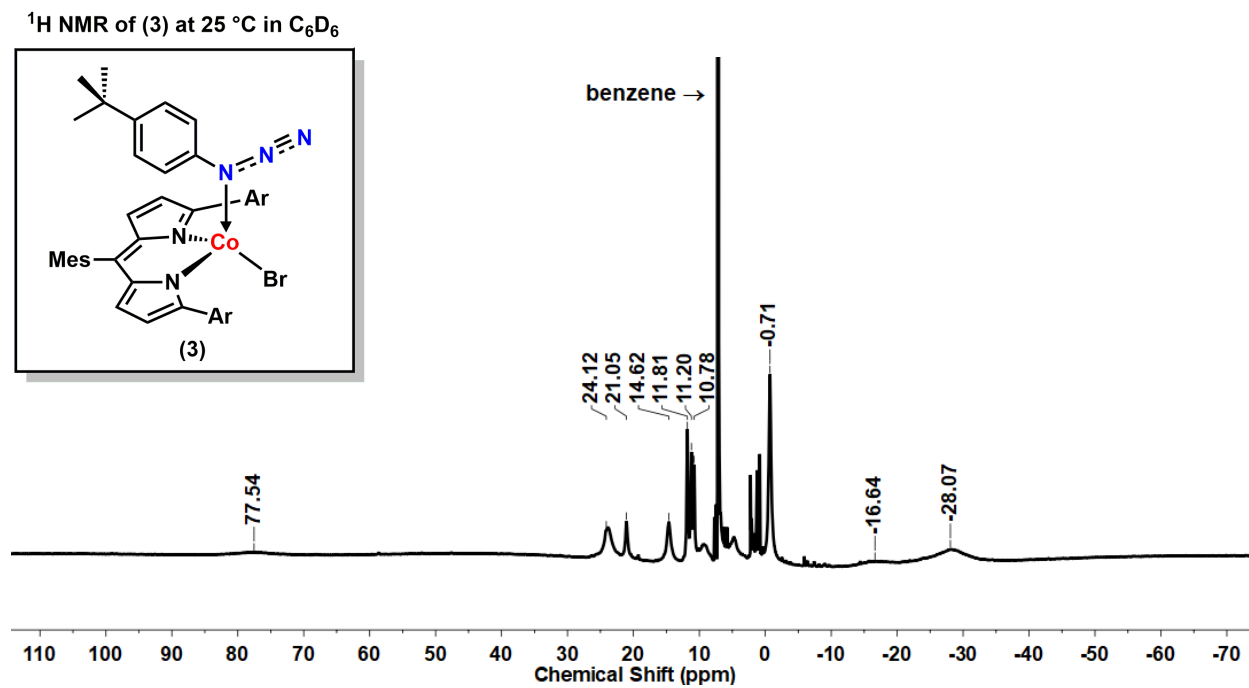

Figure S-13. 500 MHz  $^1\text{H}$  NMR spectrum of ( $^{\text{Ar}}\text{L}$ )CoBr( $\text{N}_3(\text{C}_6\text{H}_4\text{-}p\text{-}^t\text{Bu})$ ) (3) in benzene- $d_6$ .

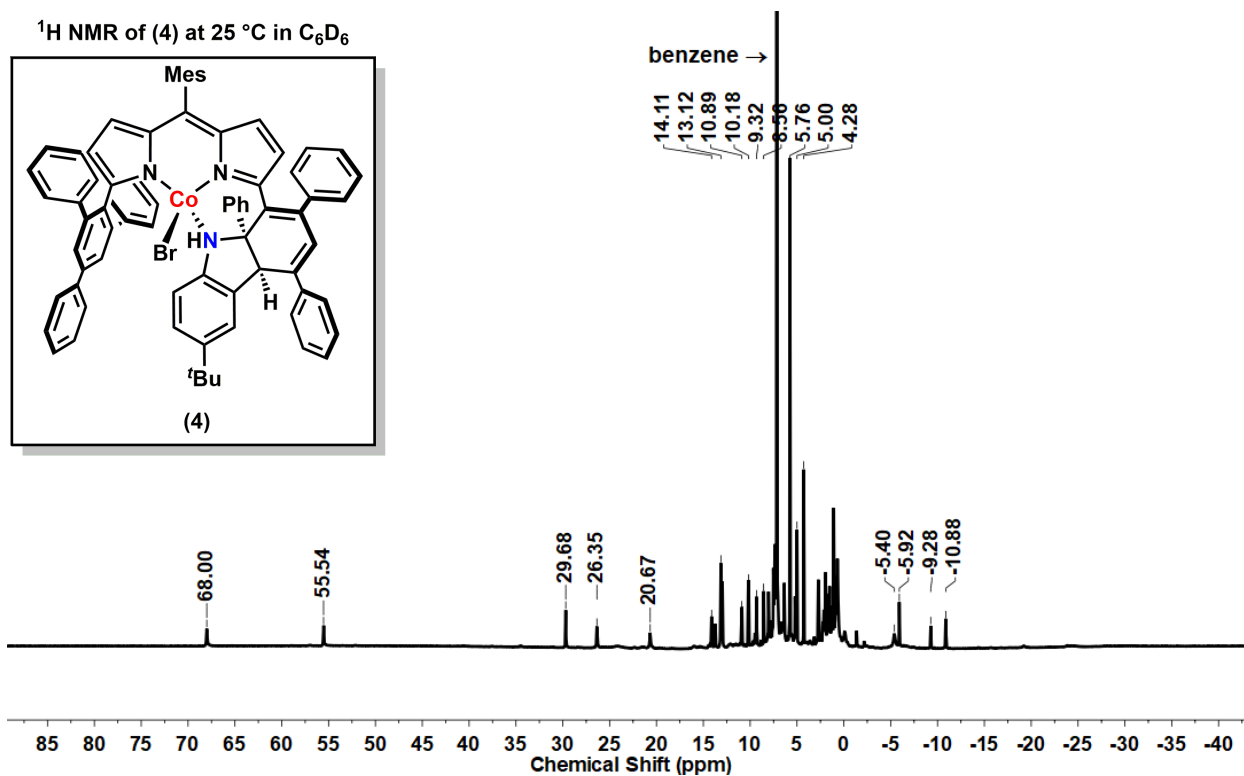

Figure S-14. 500 MHz <sup>1</sup>H NMR spectrum of (<sup>Ar</sup>L)CoBr([3+2]annulation) (4) in benzene-*d*<sub>6</sub>.

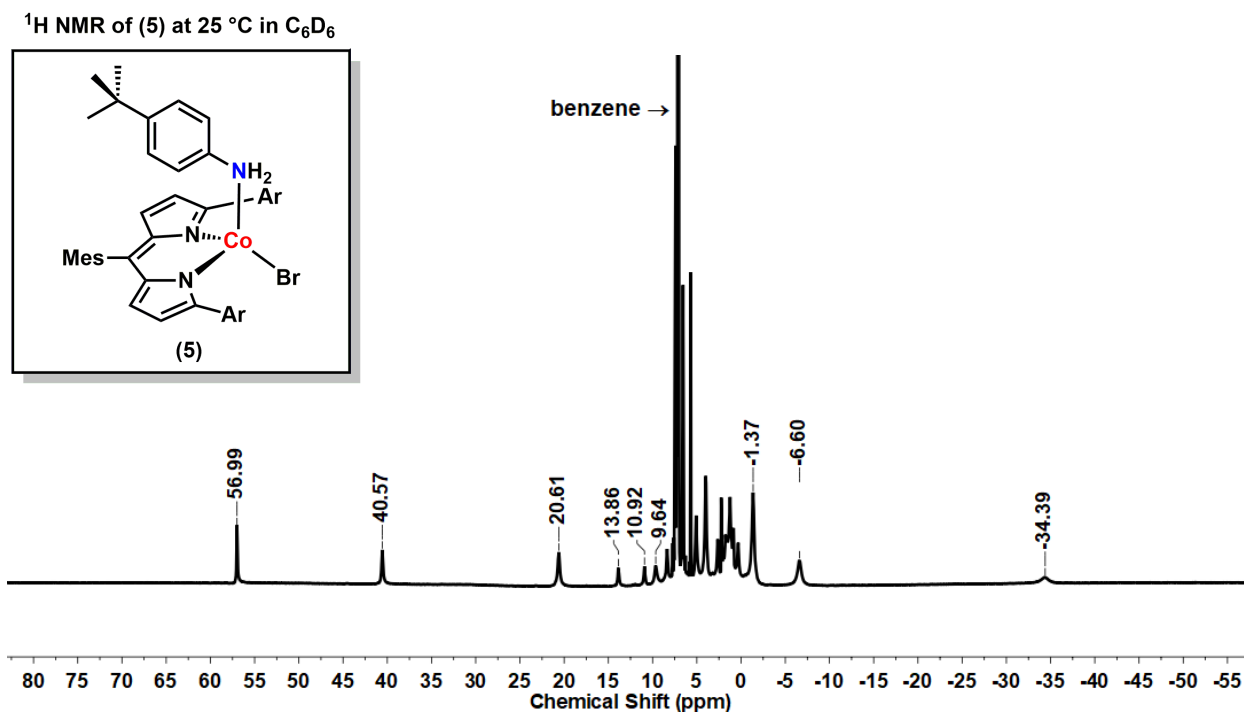

Figure S-15. 500 MHz <sup>1</sup>H NMR spectrum of (<sup>Ar</sup>L)CoBr(NH<sub>2</sub>(C<sub>6</sub>H<sub>4</sub>-*p*-<sup>t</sup>Bu)) (5) in benzene-*d*<sub>6</sub>.

$^1\text{H}$  NMR of (6), (7), and (8) at 25 °C in  $\text{C}_6\text{D}_6$

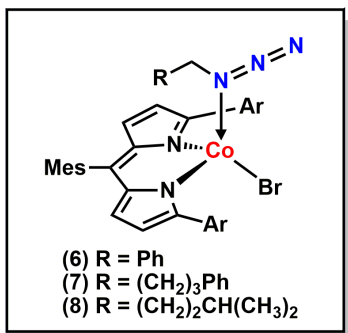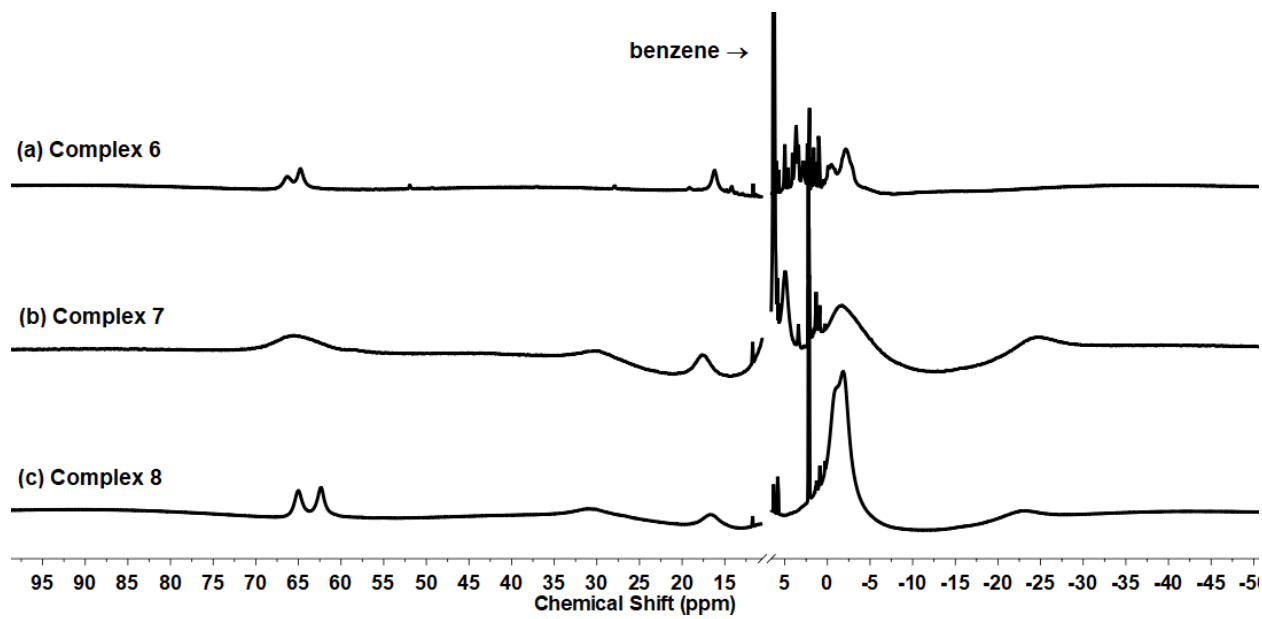

**Figure S-16.** 500 MHz  $^1\text{H}$  NMR spectra of  $(^A\text{L})\text{CoBr}(\text{N}_3\text{CH}_2\text{R})$  (**6**, **7**, and **8**) in benzene- $d_6$ .

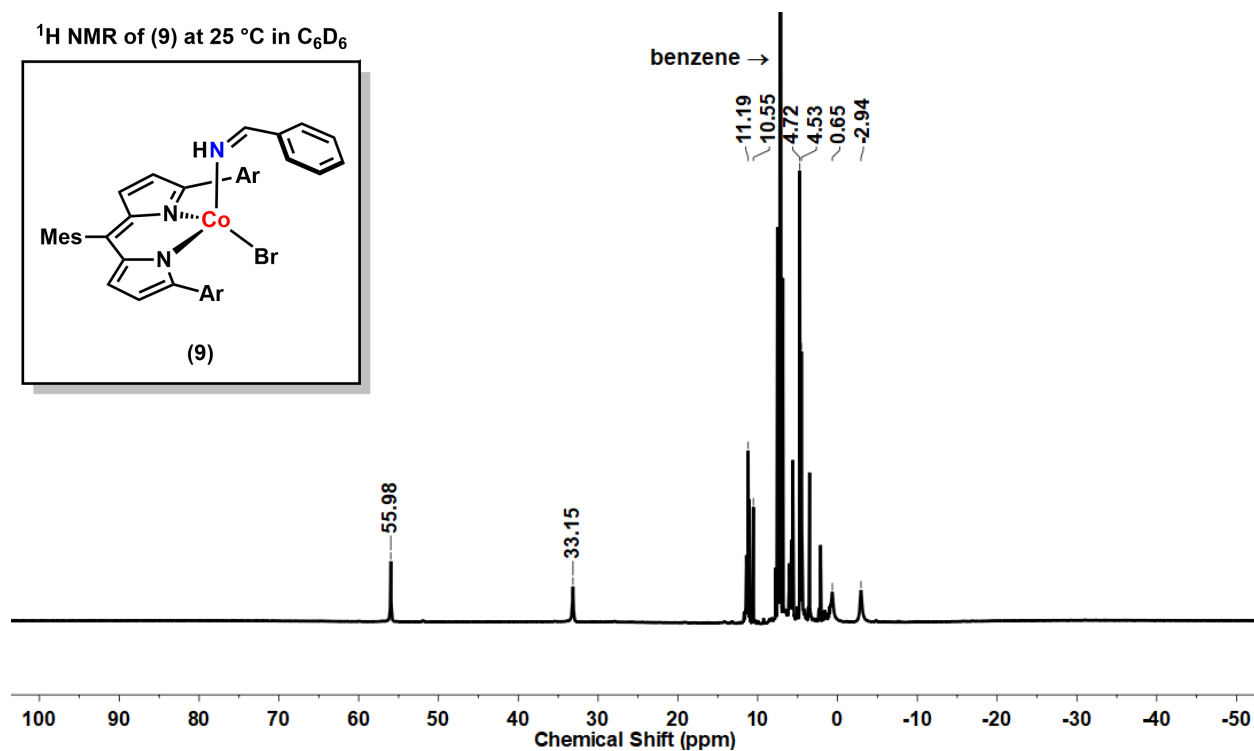

Figure S-17. 500 MHz <sup>1</sup>H NMR spectrum of (<sup>Ar</sup>L)CoBr(NHCHC<sub>6</sub>H<sub>5</sub>) (9) in benzene-*d*<sub>6</sub>.

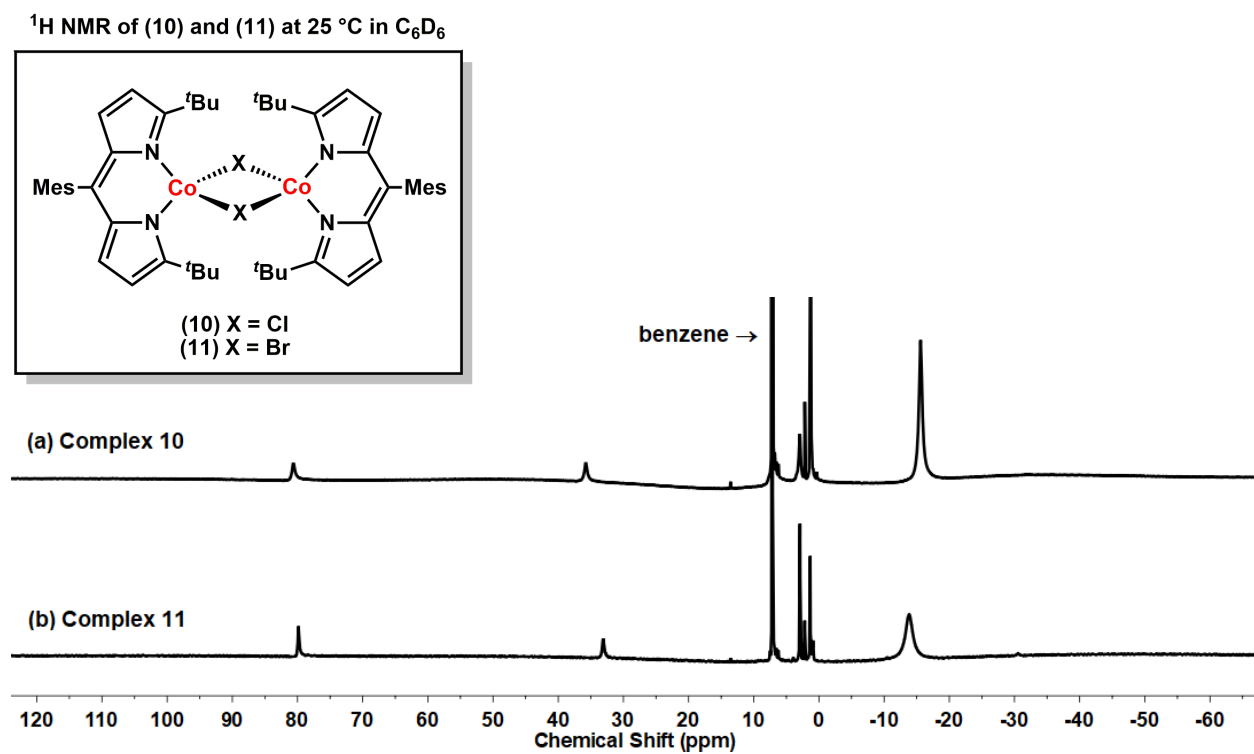

Figure S-18. 500 MHz <sup>1</sup>H NMR spectra of (a) [(<sup>t</sup>BuL)CoCl]<sub>2</sub> (10) and (b) [(<sup>t</sup>BuL)CoBr]<sub>2</sub> (11) in benzene-*d*<sub>6</sub>.

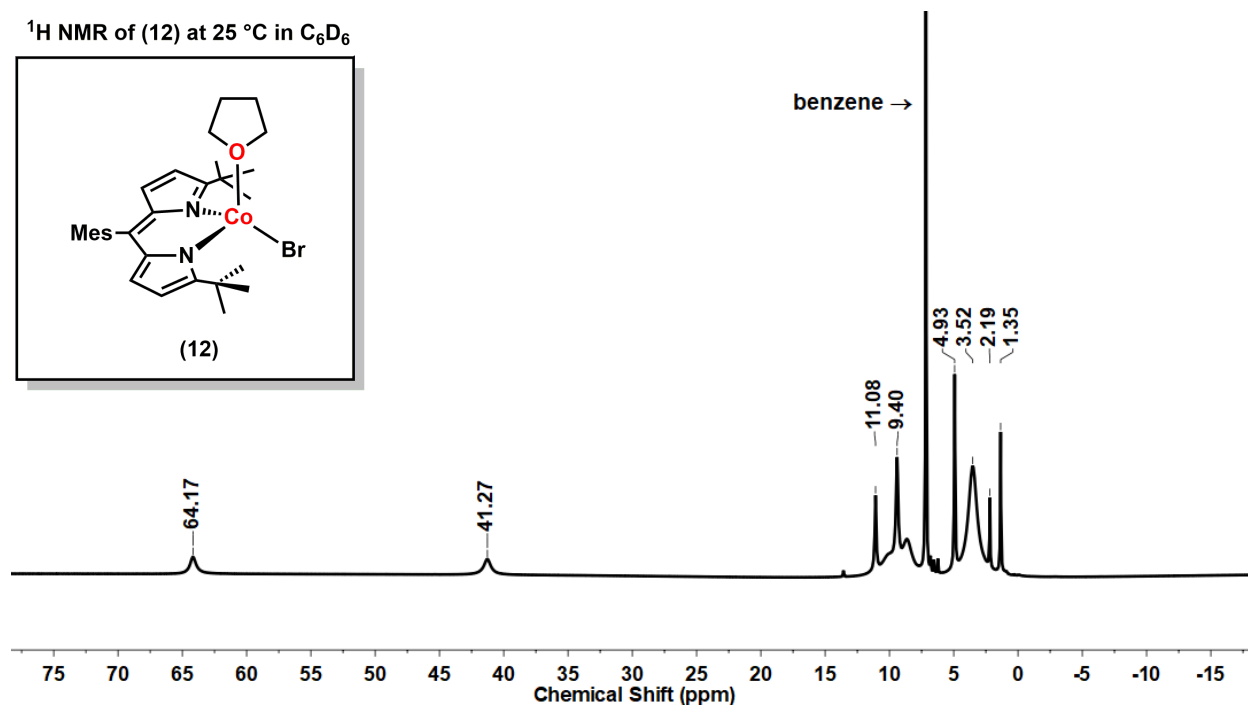

Figure S-19. 500 MHz <sup>1</sup>H NMR spectrum of (<sup>t</sup>BuL)CoBr(thf) (12) in benzene-*d*<sub>6</sub>.

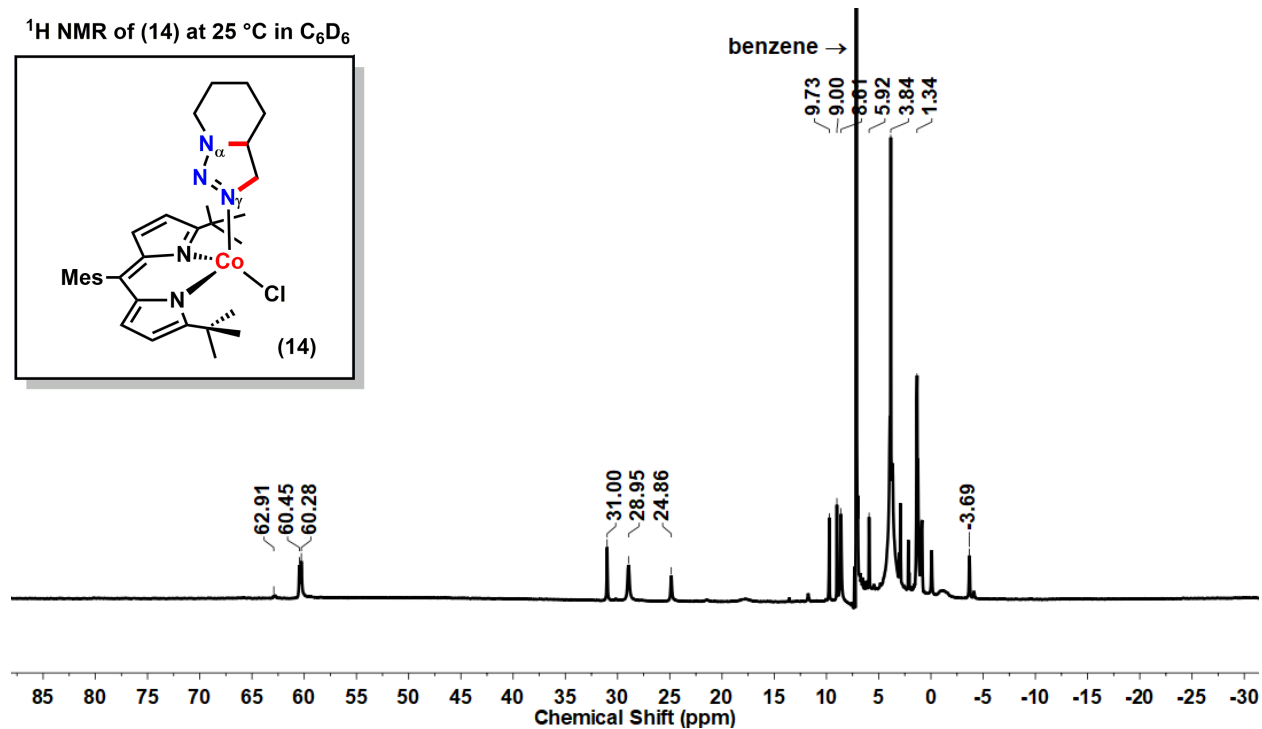

Figure S-20. 500 MHz <sup>1</sup>H NMR spectrum of (<sup>t</sup>BuL)CoCl(1,2,3-dihydrotriazole) (14) in benzene-*d*<sub>6</sub>.

$^1\text{H}$  NMR of (15), (17), and (19) at 25 °C in  $\text{C}_6\text{D}_6$

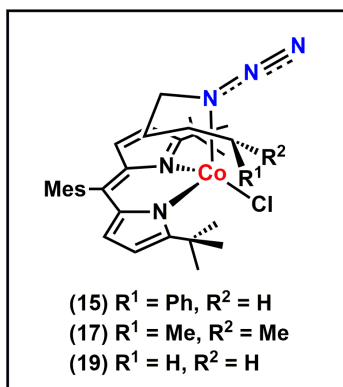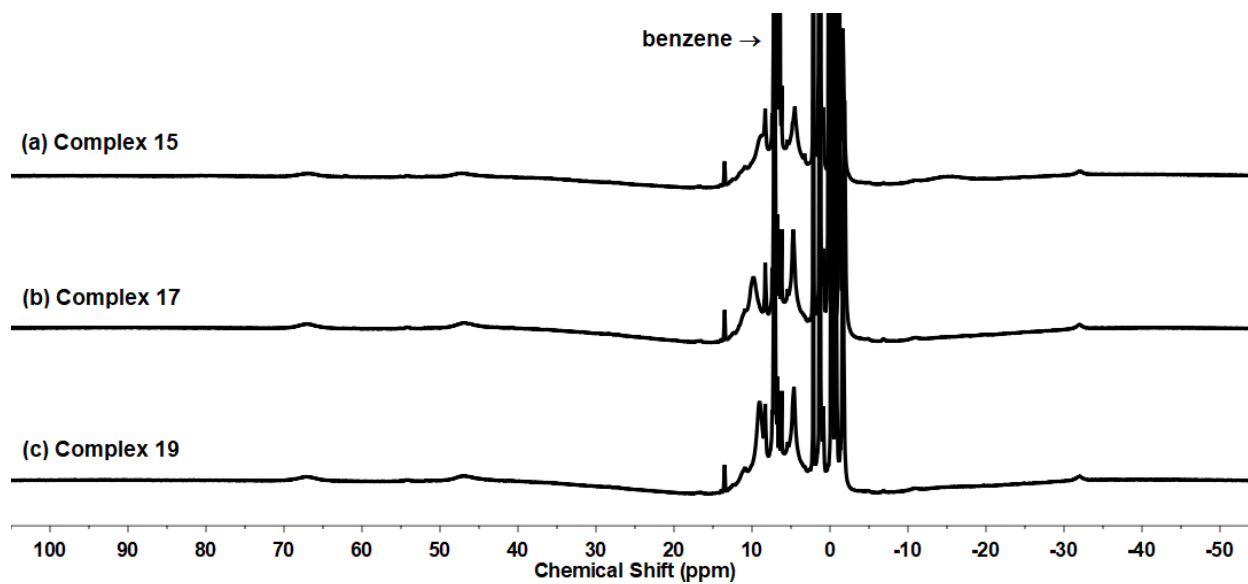

**Figure S-21.** 500 MHz  $^1\text{H}$  NMR spectra of  $(^{\text{tBu}}\text{L})\text{CoCl}(\text{N}_3\text{R})$  (15, 17, and 19) in benzene- $d_6$ .

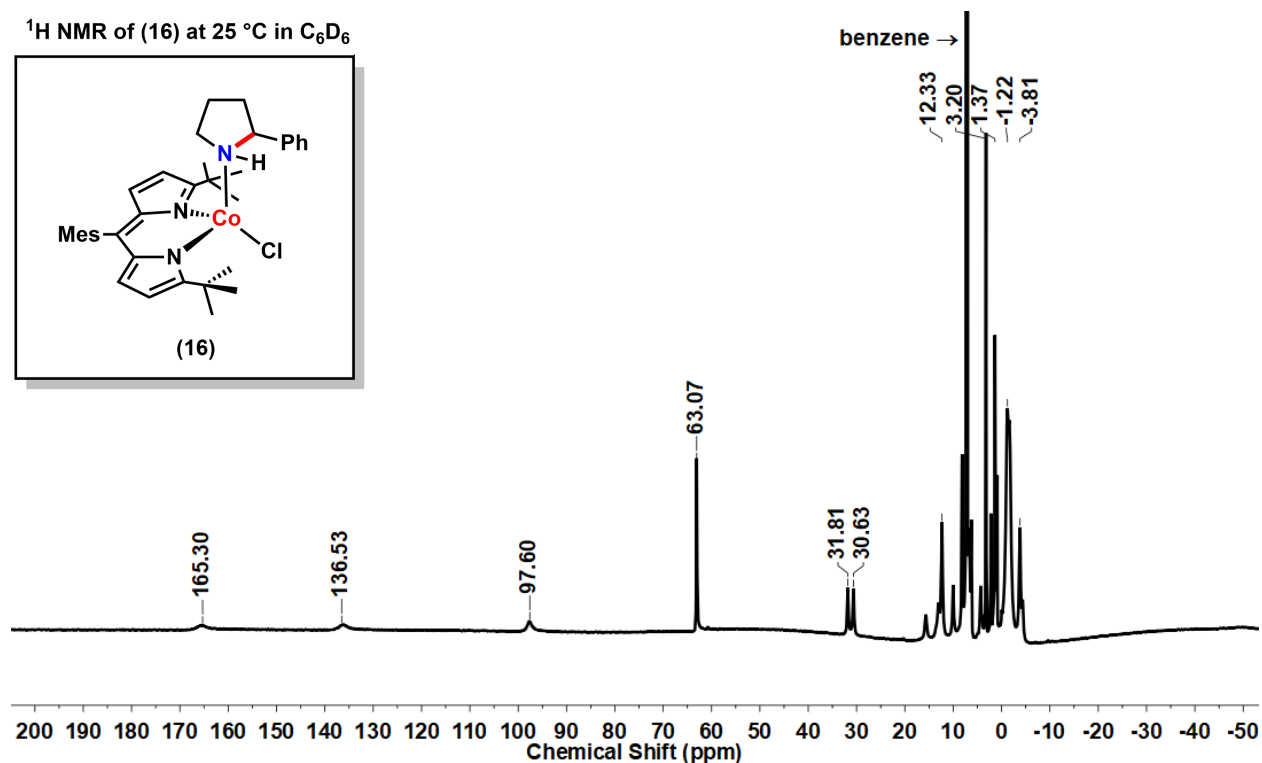

**Figure S-22.** 500 MHz <sup>1</sup>H NMR spectrum of (<sup>t</sup>BuL)CoCl(2-phenylpyrrolidine) (16) in benzene-*d*<sub>6</sub>.

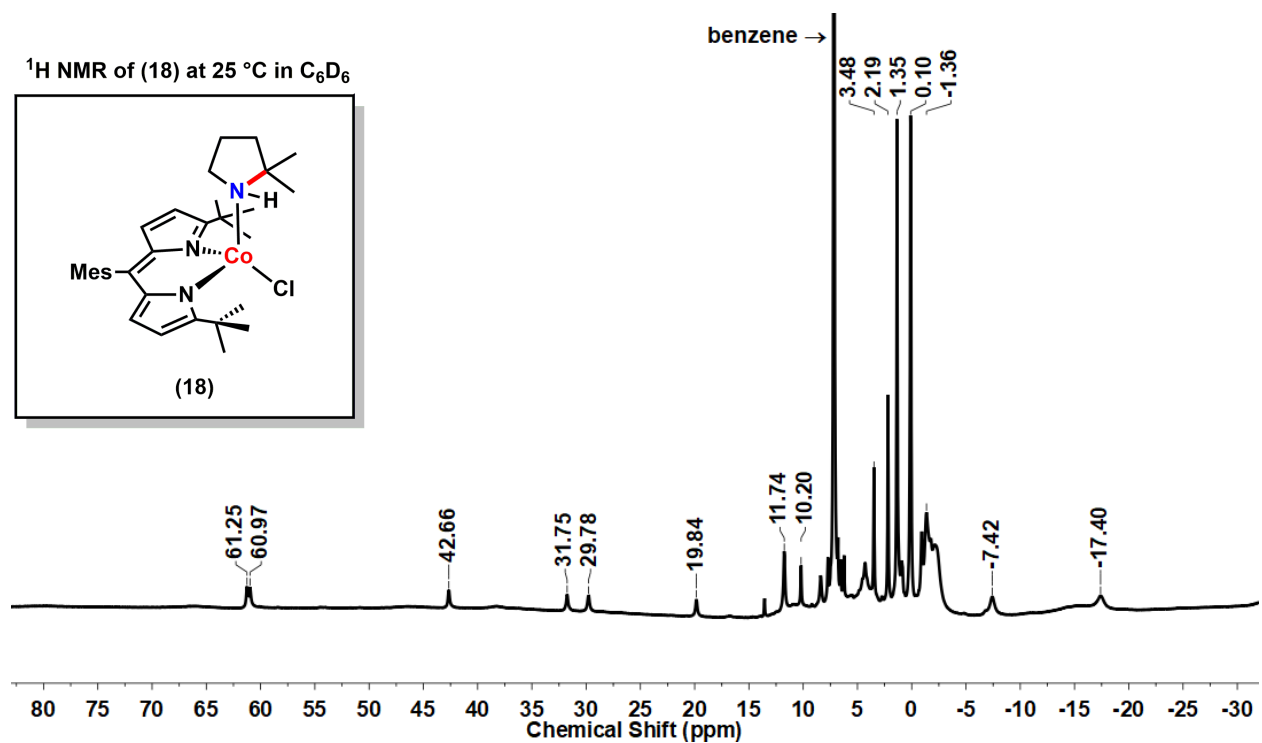

**Figure S-23.** 500 MHz <sup>1</sup>H NMR spectrum of (<sup>t</sup>BuL)CoCl(2,2-dimethylpyrrolidine) (18) in benzene-*d*<sub>6</sub>.



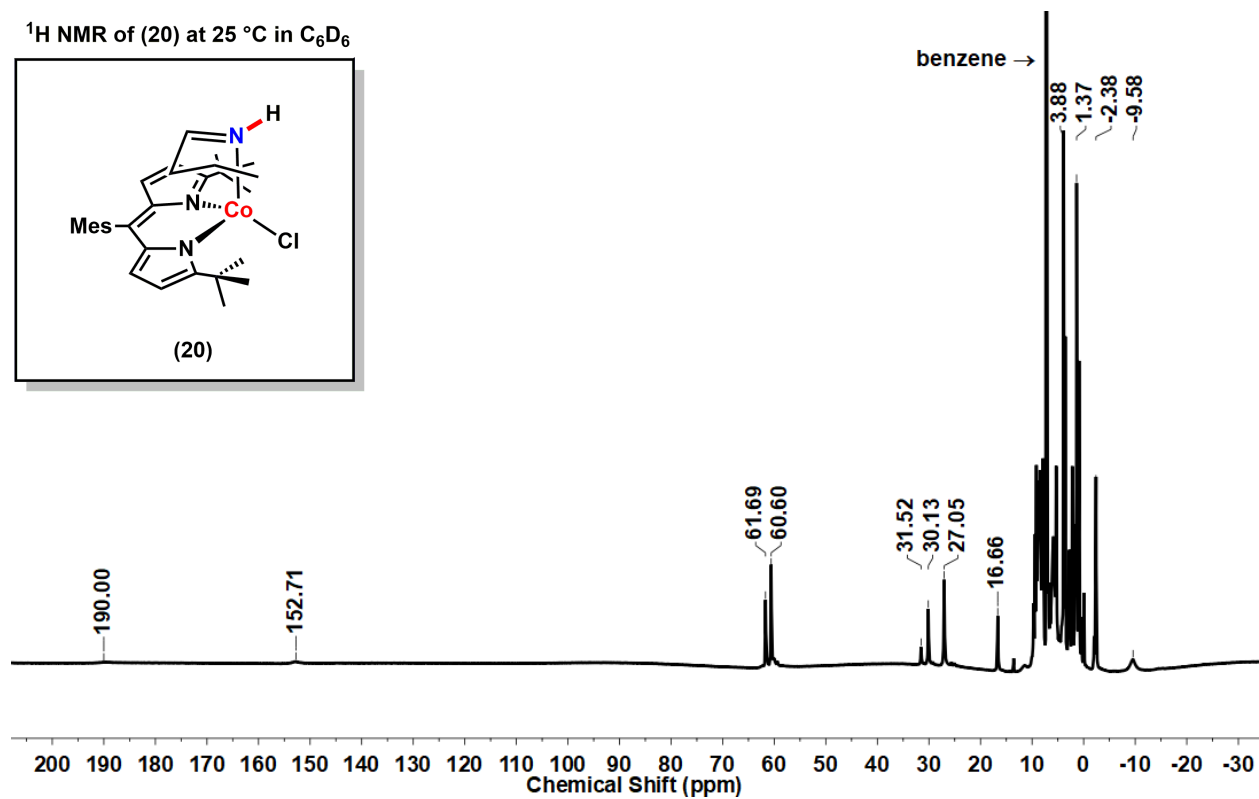

Figure S-24. 500 MHz <sup>1</sup>H NMR spectrum of (<sup>t</sup>BuL)CoCl(butan-1-imine) (20) in benzene-*d*<sub>6</sub>.

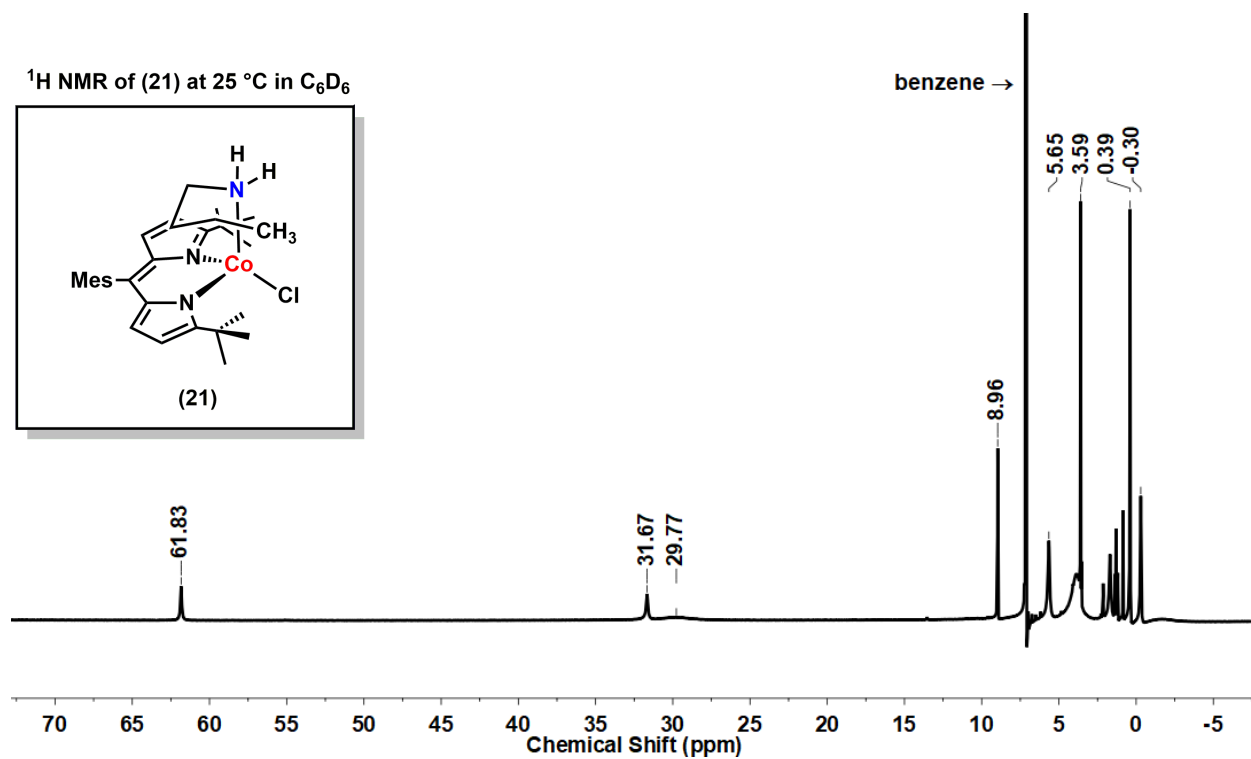

Figure S-25. 500 MHz <sup>1</sup>H NMR spectrum of (<sup>t</sup>BuL)CoCl(*n*-BuNH<sub>2</sub>) (21) in benzene-*d*<sub>6</sub>.

## X-Ray Diffraction Techniques.

**General.** All structures were collected on a Bruker three-circle platform goniometer equipped with an Apex II CCD and an Oxford cryostream cooling device. Radiation was from a graphite fine focus sealed tube Mo K $\alpha$  (0.71073 Å) source. Crystals were mounted on a cryoloop or glass fiber pin using Paratone N oil. Structures were collected at 100 K. Data was collected as a series of  $\varphi$  and/or  $\omega$  scans. Data was integrated using SAINT<sup>15</sup> and scaled with either a numerical or multi-scan absorption correction using SADABS.<sup>15</sup> The structures were solved by intrinsic methods or Patterson maps using SHELXL-2018<sup>16</sup> and refined against  $F^2$  on all data by full matrix least squares with SHELXL-2018.<sup>16</sup> All non-hydrogen atoms were refined anisotropically. Hydrogen atoms were placed at idealized positions and refined using a riding model. The isotropic displacement parameters of all hydrogen atoms were fixed to 1.2 times the atoms they are linked to (1.5 times for methyl groups). Further details on particular structures are noted below. Please refer to cif files for detail of disorder refinement.

**For section 2.5.1.** Initial 100 K structure was solved and refined as described above. For data sets obtained following heating at 345 K, non-H atoms of the product were located in difference Fourier maps, calculated with coefficients  $F_0(\text{heated}) - F_0(\text{initial\_100 K})$ , and then refined with constraints on the product molecule's atomic displacement parameters to the corresponding values of the reactant molecule (EADP instructions of SHELXL-2018, for the azide adduct and iminyl units).<sup>16</sup> The percentage of the reactant in the crystal was treated as a variable in the refinements.

More specifically, for the reactive fragment, all non-H atoms of the product were located in the reaction- difference maps, calculated with coefficients  $F_0(\text{heat}) - F_0(\text{initial})$ , and then refined with restraints on the reacted fragment's bond lengths and constraints of the atomic displacement parameters to the corresponding values of the un-reacted fragment (SADI and EADP instructions of SHELXL2018). The restraints of the atomic displacement parameters (SIMU/RIGU instructions of SHELXL-2018) if necessary, have been applied for such disorder refinement. For the non-reactive fragment, the restraints on bond lengths (SADI/SAME instructions of SHELXL-2018), as well as the restraints of the atomic displacement parameters, if necessary, have been applied for the disorder refinement. In order to get a reasonable bond length for the severely

disordered hexane and avoid a non-positive definite of atomic displacement parameters, the restraints of DFIX and ISOR were applied.

**For section 2.5.2.** The X-ray crystal structures of **7**-N<sub>2</sub> and **8**-N<sub>2</sub> were obtained from **7** and **8** respectively, using synchrotron radiation (0.41328 Å) at ChemMatCARS located at the Advanced Photon Source housed at Argonne National Lab. The data was collected at 100 K (Cryojet N<sub>2</sub> cold stream) using a vertically mounted Bruker D8 three-circle platform goniometer equipped with a PILATUS3 X CdTe 1M detector. Data was collected as a series of  $\varphi$  and/or  $\omega$  scans. Data were integrated using SAINT and scaled with a multi-scan absorption correction using SADABS.<sup>15</sup> Structures were solved by intrinsic phasing using SHELXT (Apex2 program suite v2014.1) and refined against  $F^2$  on all data by full matrix least squares with SHELXL-2014. All non-hydrogen atoms were refined anisotropically. H atoms were placed at idealized positions and refined using a riding model. For the refinement of **8**-N<sub>2</sub> specifically, a disordered hexanes molecule (1/2 occupied) was identified in the final stages of refinement. The disorder of the solvent was dealt with by application of the program Squeeze (Spek, A. L. *Acta Cryst.* **2015**, *C71*, 9-18) as implemented in Platon (Spek, A. L. *Acta Cryst.* **2009**, *D65*, 148-155) which allows for the mathematical compensation of the electron contribution of disordered solvent contained in the voids to the calculated diffraction intensities.

### **Interpretation of single-crystal transformation results.**

(1) Both **7** and **8** are stable at room temperature as supported by clean <sup>1</sup>H NMR spectra (Figure S-16), proving that there is no loss of N<sub>2</sub> and subsequent decomposition to amide, imine, or other unknown species at room temperature. If **7** or **8** co-crystallized with either Co<sup>III</sup> amide or Co<sup>II</sup> imine at room temperature, we should see a second set of distinct chemical shifts by <sup>1</sup>H NMR spectroscopy. However, those features have not been detected in the <sup>1</sup>H NMR of the crystalline material (Figure S-16). Specifically, the corresponding imine complex of **8** can be generated only upon heating (above 60 °C, 24 h) and displays distinct <sup>1</sup>H NMR chemical shifts with respect to the azide adduct precursor **8** (Figure S-7).

(2) The chemical composition and purity of **7** and **8** have also been supported by CHN elemental analysis (SI 8-9).

(3) Formation of the authentic  $\text{Co}^{\text{III}}$  alkyl amide complex ( $^{\text{ArL}}\text{CoBr}(\text{NHR})$ ) via decomposition of **7** or **8** has proven unsuccessful. Specifically, treatment of **7** or **8** with excess amount of external H-atom donors (e.g., 1,4-cyclohexadiene) shows no reactivity at room temperature. This lack of intermolecular H-atom abstraction (HAA) reactivity has been clearly stated in section 2.4 and the conclusion section to highlight the differences in reactivity between the alkyl azide adducts (**7** and **8**) and the analogous aryl azide adduct **3**. We note that independent synthesis of the authentic amide complexes from ( $^{\text{ArL}}\text{CoBr}$ ) (**2**) via salt-metathesis or stepwise deprotonation/oxidation has not been successful either, suggesting that formation of a  $\text{Co}^{\text{III}}$  amide complex is highly unlikely.

(4) In addition to the absence of intermolecular HAA reactivity, intramolecular HAA pathways to generate a  $\text{Co}^{\text{III}}$  amide complex directly from the azide adduct precursor (e.g., **7** or **8**) can be ruled out by considering the mechanism of an intramolecular 1,2-hydrogen shift observed for **8** (for literature supporting that an  $\alpha$ -H atom participates in formation of imine products from metal-nitrene precursors: *J. Am. Chem. Soc.*, **2019**, *141* (19), 7797-7806). Given that the imine adduct is the exclusive product upon thermal decomposition of **8** via the intramolecular 1,2-hydrogen shift (Figure S-7), the corresponding  $\text{Co}^{\text{III}}$  amide complex cannot even exist as an intermediate, unless the H-atom shift is stepwise, which accompanies formation of a highly unstable secondary carboradical on the C1 (or  $\text{C}\alpha$ ) position. To the best of our knowledge, there is no literature precedent supporting the presence of such an unstable intermediate. Therefore, it is impractical that such a synthetically inaccessible molecule can be naturally generated and even co-crystallized with **7** or **8** within the same crystalline lattice at room temperature.

**Table S-2.** Changes in occupancy of nitrogen atoms for **8**. The initial occupancy values for  $N_\beta$  and  $N_\gamma$  atoms of **8** (dark structure, before heating) were set to 1 for the purpose of comparing the relative changes in the occupancies before and after heating. As such, the noted occupancy values indicate relative conversions.

|                         | $N_\alpha$         | $N_\beta$ | $N_\gamma$ |
|-------------------------|--------------------|-----------|------------|
| Initial_100 K           | 1.000              | 1.000     | 1.000      |
| 1 <sup>st</sup> heating | 0.839(4), 0.161(4) | 0.839(4)  | 0.839(4)   |
| 2 <sup>nd</sup> heating | 0.829(4), 0.171(4) | 0.829(4)  | 0.829(4)   |
| 3 <sup>rd</sup> heating | 0.810(4), 0.190(4) | 0.810(4)  | 0.810(4)   |
| 4 <sup>th</sup> heating | 0.797(4), 0.203(4) | 0.797(4)  | 0.797(4)   |

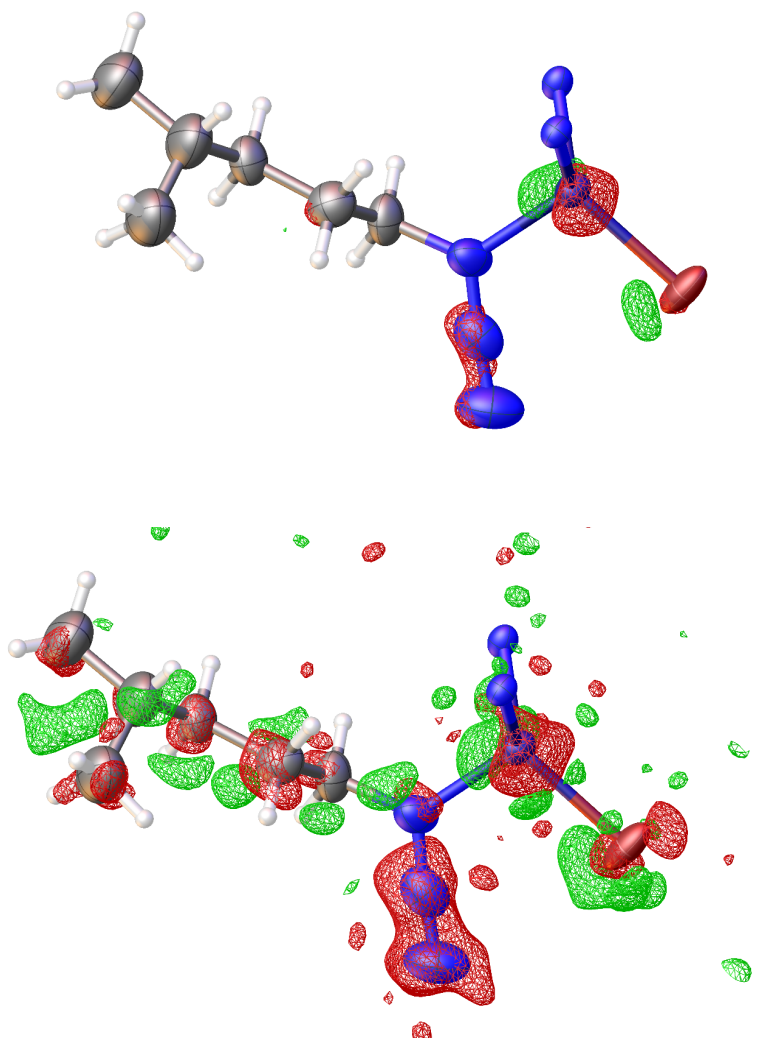

**Figure S-26.** Reaction-difference map obtained for complex **8** at 100 K following four iterations of heating to 345 K (8-heat4) (top: at 1.2 electron density level, bottom: at 0.6 electron density level). Green and red colors represent positive- and negative electron densities, respectively.

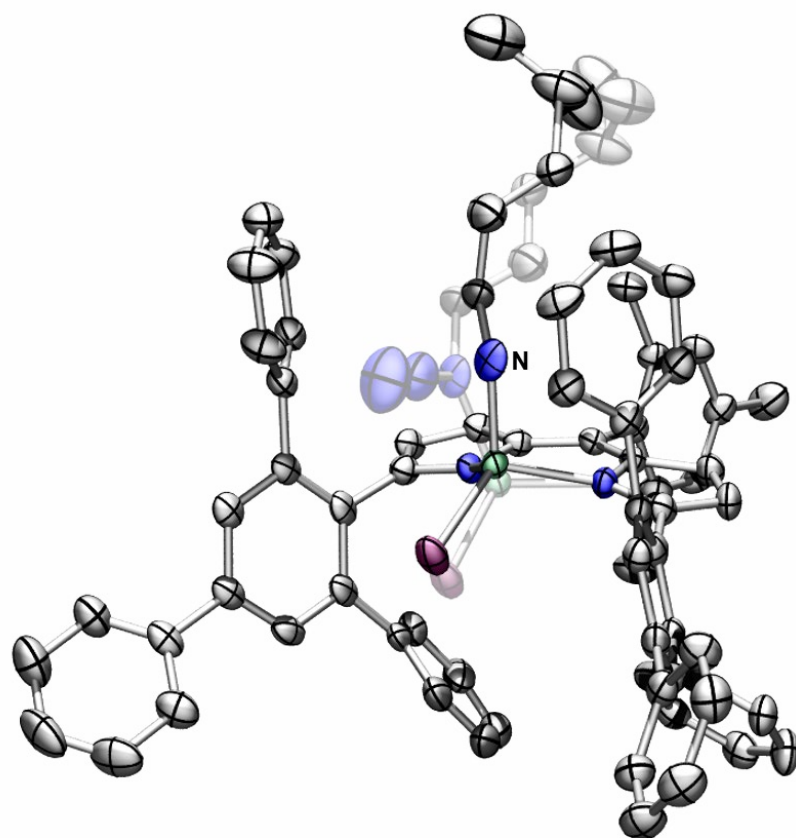

**Figure S-27.** Solid-state molecular structure for **8-N<sub>2</sub> (8-heat4)**. Thermal ellipsoid plot showing the dark structure (faded) and the heated structure (bold) generated from complex **8**.

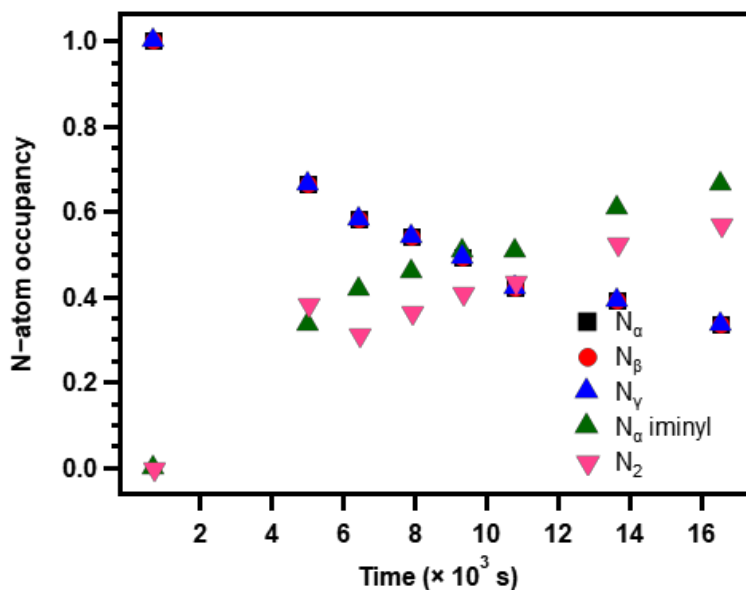

**Figure S-28.** Changes in occupancy of the organoazide N-atoms in **7** during synchrotron irradiation ( $\lambda = 0.41328 \text{ \AA}$ ).

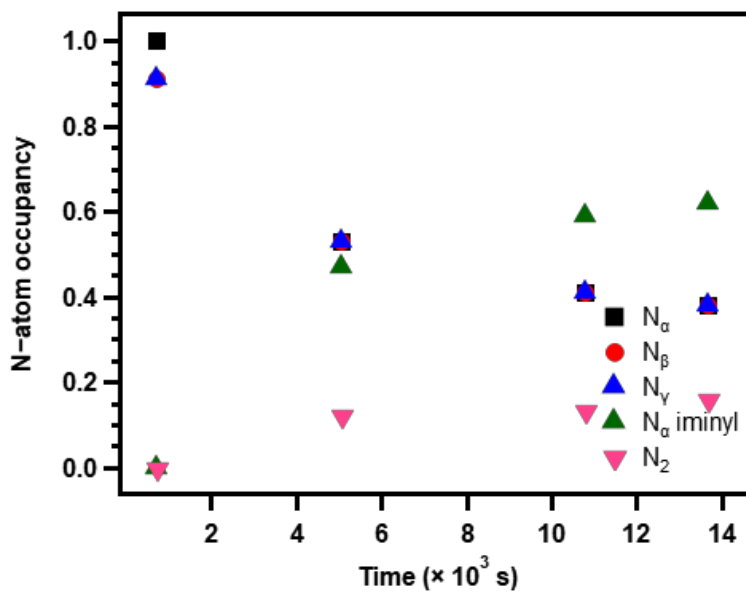

**Figure S-29.** Changes in occupancy of the organoazide N-atoms in **8** during synchrotron irradiation ( $\lambda = 0.41328 \text{ \AA}$ ).



Plane center: 0.282\*a, 0.472\*b, 0.726\*c

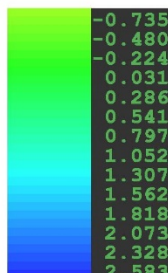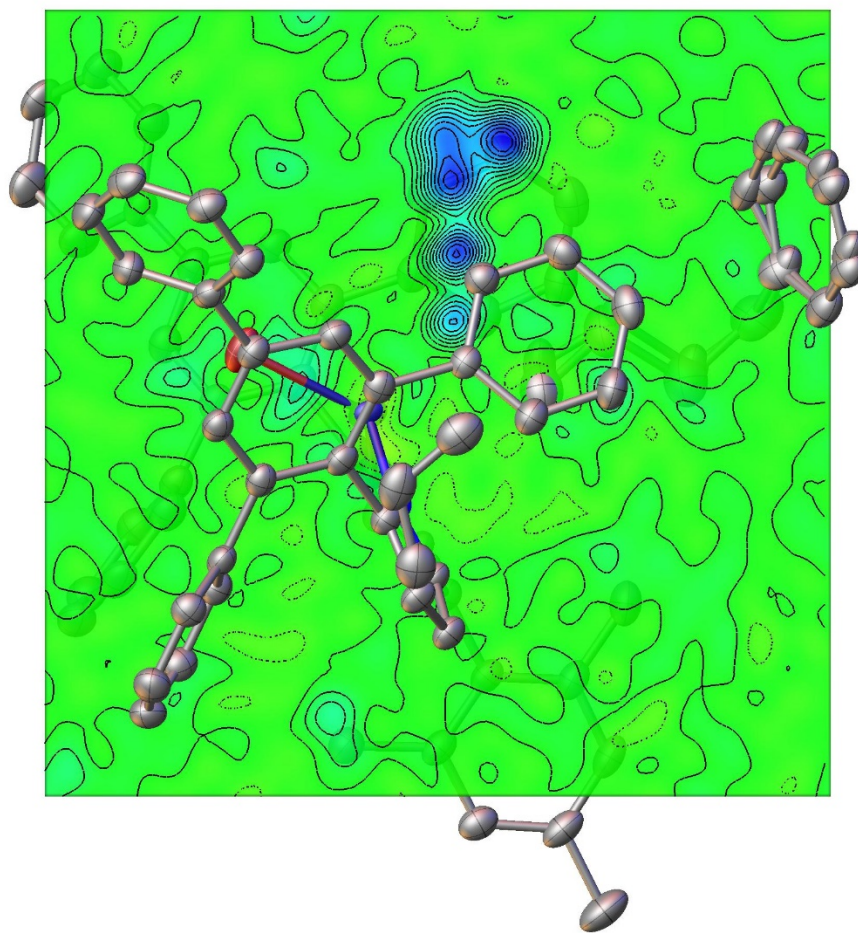

**Figure S-30.** Electron density map for 7-N<sub>2</sub>, which illustrates that the electron density of the residual azide (7) is co-localized with the electron density of the N<sub>2</sub> fragment. Due to this effective compositional disorder, we restrained the metrics of the residual 7 and the N<sub>2</sub> molecule in order to obtain chemically meaningful metrics for 7-N<sub>2</sub>.

Plane center: 0.632\*a, 0.349\*b, 0.334\*c

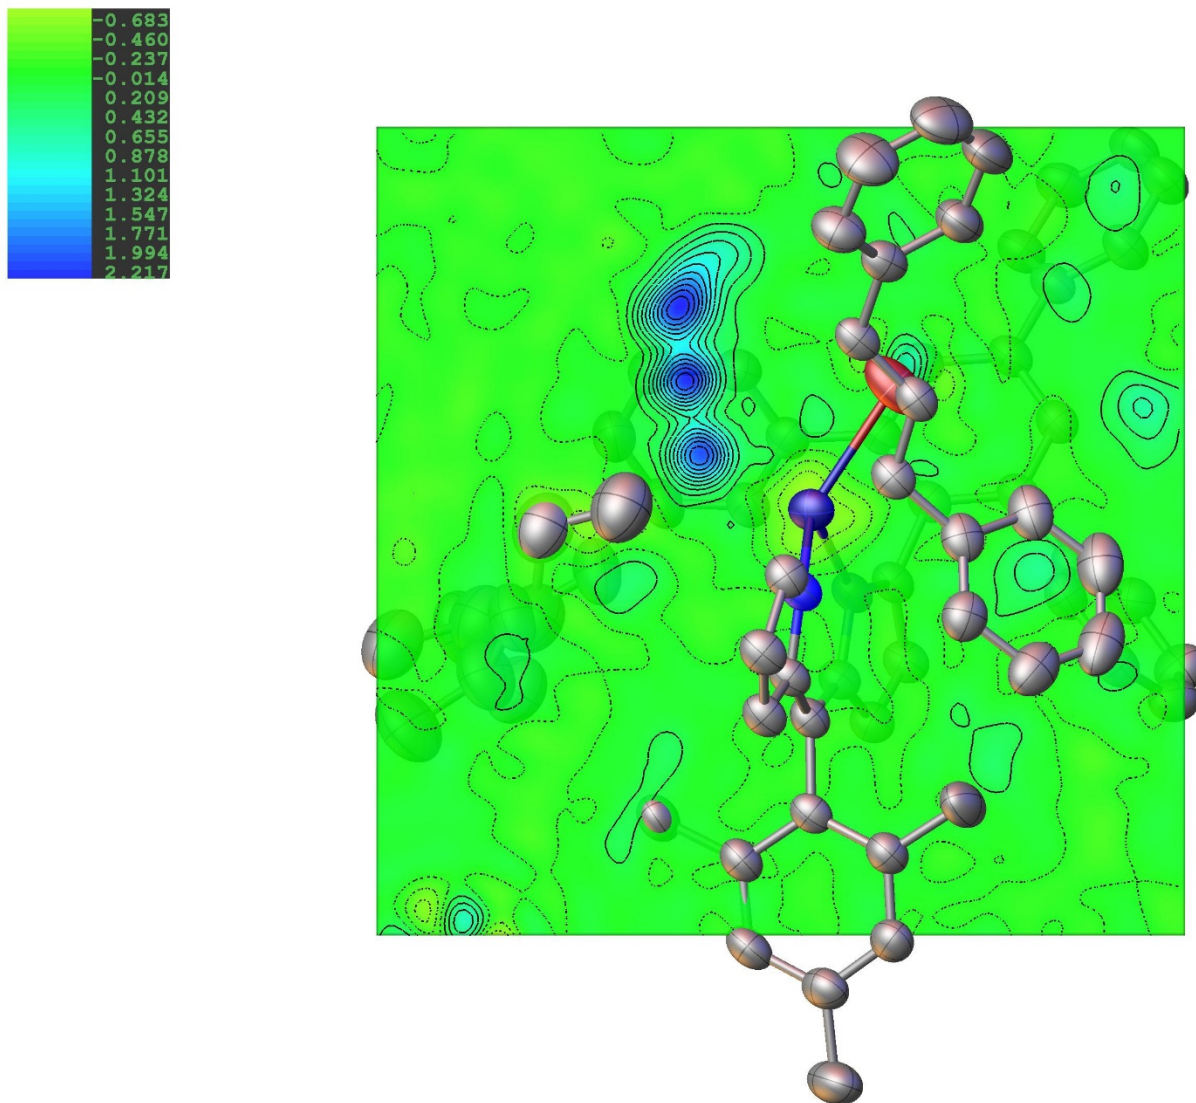

**Figure S-31.** Electron density map for  $8-N_2$ , which illustrates that the electron density of the residual azide (**8**) is co-localized with the electron density of the  $N_2$  fragment. Due to this effective compositional disorder, we restrained the metrics of the residual **8** and the  $N_2$  molecule in order to obtain chemically meaningful metrics for  $8-N_2$ .

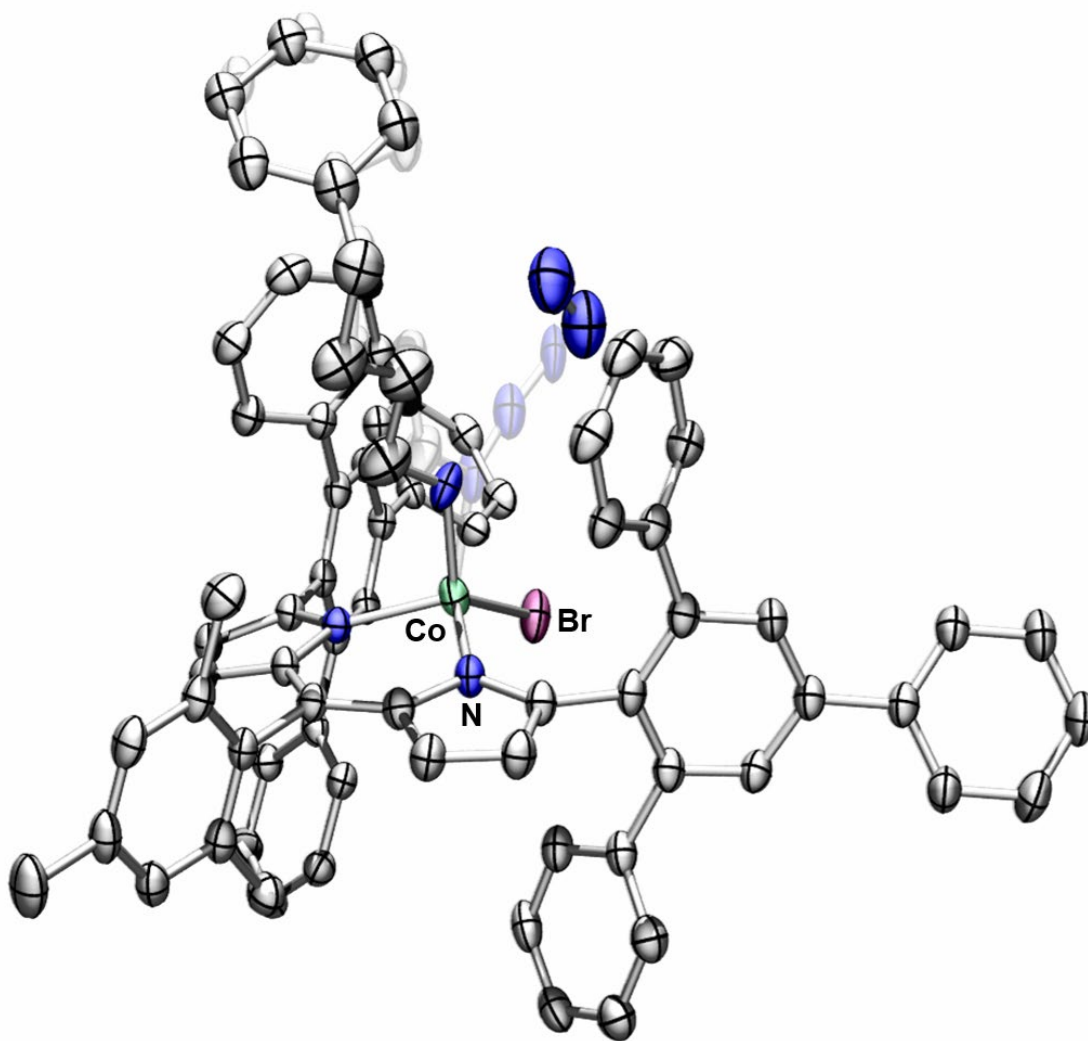

**Figure S-32.** Solid-state molecular structure for **7-N<sub>2</sub>**. Thermal ellipsoid plot showing the dark structure (faded) and the irradiated structure (bold) generated from complex **7**.

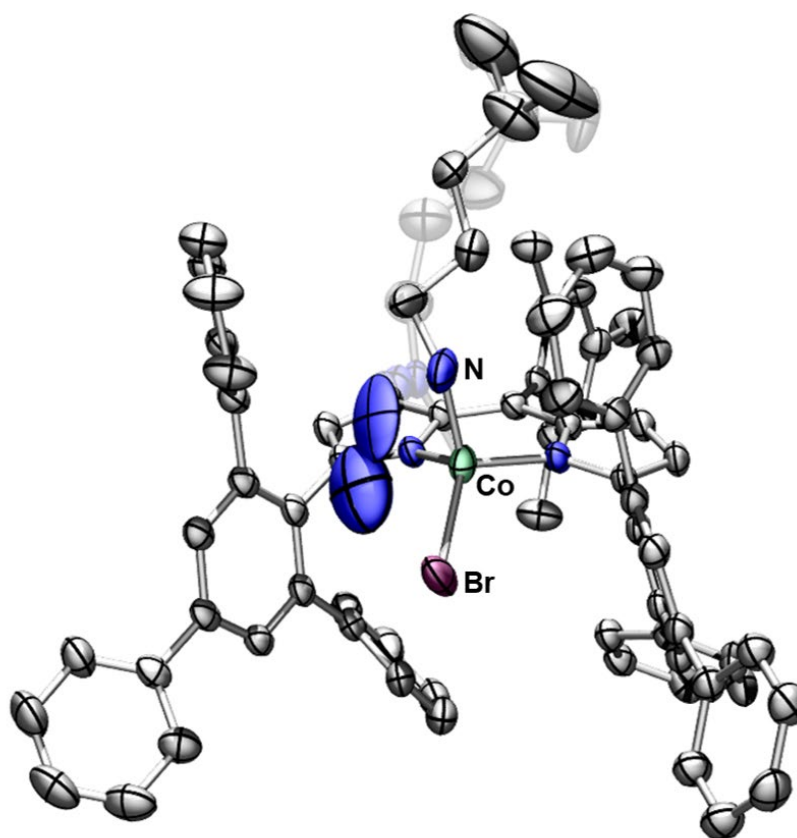

**Figure S-33.** Solid-state molecular structure for **8-N<sub>2</sub>**. Thermal ellipsoid plot showing the dark structure (faded) and the irradiated structure (bold) generated from complex **8**.

**Table S-3.** X-ray diffraction experimental details<sup>a,b</sup>

|                                                           | ( <sup>Ar</sup> L)CoBr(N <sub>3</sub> (C <sub>6</sub> H <sub>4</sub> - <i>p</i> - <sup>t</sup> Bu))<br>(3) | ( <sup>Ar</sup> L)CoBr([3+2]annulation)<br>(4)                                          | ( <sup>Ar</sup> L)CoBr(NH <sub>2</sub> (C <sub>6</sub> H <sub>4</sub> - <i>p</i> - <sup>t</sup> Bu))<br>(5) |
|-----------------------------------------------------------|------------------------------------------------------------------------------------------------------------|-----------------------------------------------------------------------------------------|-------------------------------------------------------------------------------------------------------------|
| <b>Moiety Formula</b>                                     | C <sub>76</sub> H <sub>62</sub> BrCoN <sub>5</sub> ·2(C <sub>7</sub> H <sub>8</sub> )                      | C <sub>76</sub> H <sub>62</sub> BrCoN <sub>3</sub> ·3.5(C <sub>6</sub> H <sub>6</sub> ) | C <sub>76</sub> H <sub>64</sub> BrCoN <sub>3</sub> ·2(C <sub>6</sub> H <sub>6</sub> )                       |
| <b>FW</b>                                                 | 1368.41                                                                                                    | 1429.50                                                                                 | 1314.35                                                                                                     |
| <b>Crystal System</b>                                     | Monoclinic                                                                                                 | Triclinic                                                                               | Monoclinic                                                                                                  |
| <b>Space Group (Z)</b>                                    | <i>P</i> 2 <sub>1</sub> /n (4)                                                                             | <i>P</i> $\bar{1}$ (2)                                                                  | <i>P</i> 2 <sub>1</sub> /c(4)                                                                               |
| <b>a (Å)</b>                                              | 11.5371(4)                                                                                                 | 12.5766(4)                                                                              | 17.7144(19)                                                                                                 |
| <b>b (Å)</b>                                              | 22.8606(10)                                                                                                | 13.7287(5)                                                                              | 21.629(2)                                                                                                   |
| <b>c (Å)</b>                                              | 27.3251(12)                                                                                                | 22.5774(8)                                                                              | 18.715(2)                                                                                                   |
| <b><math>\alpha</math> (°)</b>                            | 90                                                                                                         | 100.712(1)                                                                              | 90                                                                                                          |
| <b><math>\beta</math> (°)</b>                             | 94.279(4)                                                                                                  | 94.999(1)                                                                               | 108.264(2)                                                                                                  |
| <b><math>\gamma</math> (°)</b>                            | 90                                                                                                         | 93.362(1)                                                                               | 90                                                                                                          |
| <b>Volume (Å<sup>3</sup>)</b>                             | 7186.8(5)                                                                                                  | 3804.6(2)                                                                               | 6809.3(13)                                                                                                  |
| <b>Calc. <math>\rho</math> (mg/m<sup>3</sup>)</b>         | 1.265                                                                                                      | 1.248                                                                                   | 1.282                                                                                                       |
| <b><math>\mu</math> (mm<sup>-1</sup>)</b>                 | 0.846                                                                                                      | 0.801                                                                                   | 0.889                                                                                                       |
| <b>Crystal Size (mm)</b>                                  | 0.20×0.10×0.06                                                                                             | 0.35×0.20×0.08                                                                          | 0.40×0.20×0.15                                                                                              |
| <b>Reflections</b>                                        | 12706                                                                                                      | 13508                                                                                   | 12048                                                                                                       |
| <b>Completeness (to 2<math>\theta</math>)</b>             | 100%<br>25.027°                                                                                            | 99.6%<br>25.085°                                                                        | 99.9%<br>25.043°                                                                                            |
| <b>GOF on F<sup>2</sup></b>                               | 1.083                                                                                                      | 1.014                                                                                   | 1.029                                                                                                       |
| <b>R1, wR2<sup>c</sup> [I&gt;2<math>\sigma</math>(I)]</b> | 0.0872, 0.1685                                                                                             | 0.0552, 0.1230                                                                          | 0.0451, 0.1163                                                                                              |

<sup>a</sup>  $\lambda = 0.71073$  Å; <sup>b</sup> T = 100(2) K; <sup>c</sup> R1 =  $\Sigma||F_o| - |F_c|| / \Sigma|F_o|$ , wR2 =  $\{\Sigma[w(F_o^2 - F_c^2)^2] / \Sigma[w(F_o^2)]\}^{1/2}$

|                                         | <sup>(ArL)</sup> CoBr(N <sub>3</sub> R)<br>R = (CH <sub>2</sub> ) <sub>4</sub> Ph<br>(7) | <sup>(ArL)</sup> CoBr(N <sub>3</sub> R)<br>R = (CH <sub>2</sub> ) <sub>3</sub> C(CH <sub>3</sub> )<br>(8) | <sup>(ArL)</sup> CoBr(NHCHC <sub>6</sub> H <sub>5</sub> )<br>(9)                         |
|-----------------------------------------|------------------------------------------------------------------------------------------|-----------------------------------------------------------------------------------------------------------|------------------------------------------------------------------------------------------|
| <b>Moiety Formula</b>                   | C <sub>76</sub> H <sub>62</sub> BrCoN <sub>5</sub>                                       | C <sub>72</sub> H <sub>62</sub> BrCoN <sub>5</sub> ·0.5(C <sub>6</sub> H <sub>14</sub> )                  | 2(C <sub>73</sub> H <sub>56</sub> BrCoN <sub>3</sub> )·3(C <sub>7</sub> H <sub>8</sub> ) |
| <b>FW</b>                               | 1184.14                                                                                  | 1179.19                                                                                                   | 1252.25                                                                                  |
| <b>Crystal System</b>                   | Triclinic                                                                                | Monoclinic                                                                                                | Triclinic                                                                                |
| <b>Space Group</b>                      | <i>P</i> $\bar{1}$ (2)                                                                   | <i>P</i> 2 <sub>1</sub> / <i>c</i> (4)                                                                    | <i>P</i> $\bar{1}$ (2)                                                                   |
| <b>(Z)</b>                              |                                                                                          |                                                                                                           |                                                                                          |
| <b>a (Å)</b>                            | 11.8481(4)                                                                               | 11.5036(5)                                                                                                | 11.7393(6)                                                                               |
| <b>b (Å)</b>                            | 12.2353 (3)                                                                              | 21.4756(11)                                                                                               | 14.6478(7)                                                                               |
| <b>c (Å)</b>                            | 22.6467 (7)                                                                              | 25.3211(13)                                                                                               | 19.8506(10)                                                                              |
| <b>α (°)</b>                            | 95.171(2)                                                                                | 90                                                                                                        | 81.004(1)                                                                                |
| <b>β (°)</b>                            | 101.347(3)                                                                               | 99.4205(16)                                                                                               | 80.061(1)                                                                                |
| <b>γ (°)</b>                            | 107.834(3)                                                                               | 90                                                                                                        | 75.351(1)                                                                                |
| <b>Volume (Å<sup>3</sup>)</b>           | 3027.11(17)                                                                              | 6171.1(5)                                                                                                 | 3230.1(3)                                                                                |
| <b>Calc. ρ (mg/m<sup>3</sup>)</b>       | 1.300                                                                                    | 1.269                                                                                                     | 1.288                                                                                    |
| <b>μ (mm<sup>-1</sup>)</b>              | 0.993                                                                                    | 0.973                                                                                                     | 0.933                                                                                    |
| <b>Crystal Size (mm)</b>                | 0.25×0.20×0.05                                                                           | 0.39×0.25×0.16                                                                                            | 0.18×0.10×0.06                                                                           |
| <b>Reflections</b>                      | 10711                                                                                    | 10995                                                                                                     | 11459                                                                                    |
| <b>Completeness (to 2θ)</b>             | 99.8%<br>25.058°                                                                         | 99.4%<br>25.096°                                                                                          | 99.9%<br>25.061°                                                                         |
| <b>GOF on F<sup>2</sup></b>             | 1.011                                                                                    | 1.016                                                                                                     | 1.006                                                                                    |
| <b>R1, wR2<sup>c</sup> [I&gt;2σ(I)]</b> | 0.0495, 0.1045                                                                           | 0.0605, 0.1713                                                                                            | 0.0395, 0.0835                                                                           |

|                                                           | $[(^i\text{BuL})\text{CoBr}]_2$<br>(11)    | $(^i\text{BuL})\text{CoBr}(\text{thf})$<br>(12) | $(^i\text{BuL})\text{CoBr}(1,2,3\text{-dihydrotriazole})$<br>(14-Br) | $(^i\text{BuL})\text{CoBr}(2\text{-phenylpyrrolidine})$<br>(16-Br) |
|-----------------------------------------------------------|--------------------------------------------|-------------------------------------------------|----------------------------------------------------------------------|--------------------------------------------------------------------|
| <b>Moiety Formula</b>                                     | $\text{C}_{26}\text{H}_{33}\text{BrCoN}_2$ | $\text{C}_{30}\text{H}_{41}\text{BrCoN}_2$<br>O | $\text{C}_{32}\text{H}_{44}\text{BrCoN}_5$                           | $\text{C}_{36}\text{H}_{46}\text{BrCoN}_3$                         |
| <b>FW</b>                                                 | 512.38                                     | 1168.97                                         | 637.56                                                               | 659.60                                                             |
| <b>Crystal System</b>                                     | Triclinic                                  | Triclinic                                       | Monoclinic                                                           | Triclinic                                                          |
| <b>Space Group (Z)</b>                                    | $P\bar{1}$ (2)                             | $P\bar{1}$ (2)                                  | $P2_1/c$ (4)                                                         | $P\bar{1}$ (2)                                                     |
| <b>a (Å)</b>                                              | 9.8826(5)                                  | 14.3907(10)                                     | 10.5174(9)                                                           | 9.3829(7)                                                          |
| <b>b (Å)</b>                                              | 10.8049(4)                                 | 14.9859(10)                                     | 18.4889(16)                                                          | 13.2694(10)                                                        |
| <b>c (Å)</b>                                              | 13.3280(6)                                 | 15.2440(11)                                     | 17.0030(15)                                                          | 14.2996(11)                                                        |
| <b><math>\alpha</math> (°)</b>                            | 108.738(1)                                 | 92.015(1)                                       | 90                                                                   | 67.174(2)                                                          |
| <b><math>\beta</math> (°)</b>                             | 92.612(1)                                  | 98.561(1)                                       | 105.908(2)                                                           | 84.707(2)                                                          |
| <b><math>\gamma</math> (°)</b>                            | 112.333(1)                                 | 115.785(1)                                      | 90                                                                   | 82.391(2)                                                          |
| <b>Volume (Å<sup>3</sup>)</b>                             | 1223.60(10)                                | 2908.7(4)                                       | 3179.7(5)                                                            | 1624.9(2)                                                          |
| <b>Calc. <math>\rho</math> (mg/m<sup>3</sup>)</b>         | 1.391                                      | 1.335                                           | 1.332                                                                | 1.348                                                              |
| <b><math>\mu</math> (mm<sup>-1</sup>)</b>                 | 2.349                                      | 1.987                                           | 1.825                                                                | 1.786                                                              |
| <b>Crystal Size (mm)</b>                                  | 0.25×0.20×0.15                             | 0.40×0.20×0.18                                  | 0.30×0.19×0.07                                                       | 0.20×0.18×0.06                                                     |
| <b>Reflections</b>                                        | 4306                                       | 10281                                           | 5637                                                                 | 5746                                                               |
| <b>Completeness (to 2<math>\theta</math>)</b>             | 99.2%<br>25.072°                           | 98.9%<br>25.048°                                | 100%<br>25.045°                                                      | 99.6%<br>25.077°                                                   |
| <b>GOF on F<sup>2</sup></b>                               | 1.028                                      | 1.062                                           | 1.058                                                                | 1.015                                                              |
| <b>R1, wR2<sup>c</sup> [I&gt;2<math>\sigma</math>(I)]</b> | 0.0351, 0.0725                             | 0.0269, 0.0607                                  | 0.0352, 0.0852                                                       | 0.0546, 0.1212                                                     |

|                                         | <sup>(tBuL)</sup> CoCl(2,2-dimethylpyrrolidine)<br>(18)                                  | <sup>(tBuL)</sup> CoCl(NHCH(CH <sub>2</sub> ) <sub>2</sub> CH <sub>3</sub> )<br>(20) | <sup>(ArL)</sup> CoCl(NH <sub>2</sub> (CH <sub>2</sub> ) <sub>3</sub> CH <sub>3</sub> )<br>(21) |
|-----------------------------------------|------------------------------------------------------------------------------------------|--------------------------------------------------------------------------------------|-------------------------------------------------------------------------------------------------|
| <b>Moiety Formula</b>                   | 2(C <sub>16</sub> H <sub>23</sub> Cl <sub>0.5</sub> Co <sub>0.5</sub> N <sub>1.5</sub> ) | C <sub>30</sub> H <sub>42</sub> ClCoN <sub>3</sub>                                   | C <sub>30</sub> H <sub>44</sub> ClCoN <sub>3</sub>                                              |
| <b>FW</b>                               | 567.10                                                                                   | 539.04                                                                               | 541.06                                                                                          |
| <b>Crystal System</b>                   | Orthorhombic                                                                             | Monoclinic                                                                           | Monoclinic                                                                                      |
| <b>Space Group</b>                      | <i>Pnma</i> (4)                                                                          | <i>P2<sub>1</sub>/n</i> (4)                                                          | <i>P2<sub>1</sub>/n</i> (4)                                                                     |
| <b>(Z)</b>                              |                                                                                          |                                                                                      |                                                                                                 |
| <b>a (Å)</b>                            | 19.6732(14)                                                                              | 13.892(2)                                                                            | 13.8661(8)                                                                                      |
| <b>b (Å)</b>                            | 8.7859(8)                                                                                | 13.8768(18)                                                                          | 13.8215(9)                                                                                      |
| <b>c (Å)</b>                            | 17.5128(12)                                                                              | 16.289(2)                                                                            | 16.3606(10)                                                                                     |
| <b>α (°)</b>                            | 90                                                                                       | 90                                                                                   | 90                                                                                              |
| <b>β (°)</b>                            | 90                                                                                       | 111.131(2)                                                                           | 111.490(2)                                                                                      |
| <b>γ (°)</b>                            | 90                                                                                       | 90                                                                                   | 90                                                                                              |
| <b>Volume (Å<sup>3</sup>)</b>           | 3027.0(4)                                                                                | 2928.9(7)                                                                            | 2917.5(3)                                                                                       |
| <b>Calc. ρ (mg/m<sup>3</sup>)</b>       | 1.244                                                                                    | 1.222                                                                                | 1.232                                                                                           |
| <b>μ (mm<sup>-1</sup>)</b>              | 0.680                                                                                    | 0.699                                                                                | 0.703                                                                                           |
| <b>Crystal Size (mm)</b>                | 0.20×0.15×0.13                                                                           | 0.40×0.18×0.09                                                                       | 0.50×0.30×0.10                                                                                  |
| <b>Reflections</b>                      | 2879                                                                                     | 5133                                                                                 | 5194                                                                                            |
| <b>Completeness (to 2θ)</b>             | 99.7%<br>25.085°                                                                         | 98.8%<br>25.052°                                                                     | 99.7%<br>25.100°                                                                                |
| <b>GOF on F<sup>2</sup></b>             | 1.181                                                                                    | 1.001                                                                                | 1.084                                                                                           |
| <b>R1, wR2<sup>c</sup> [I&gt;2σ(I)]</b> | 0.0685, 0.1450                                                                           | 0.0581, 0.1289                                                                       | 0.0445, 0.0813                                                                                  |



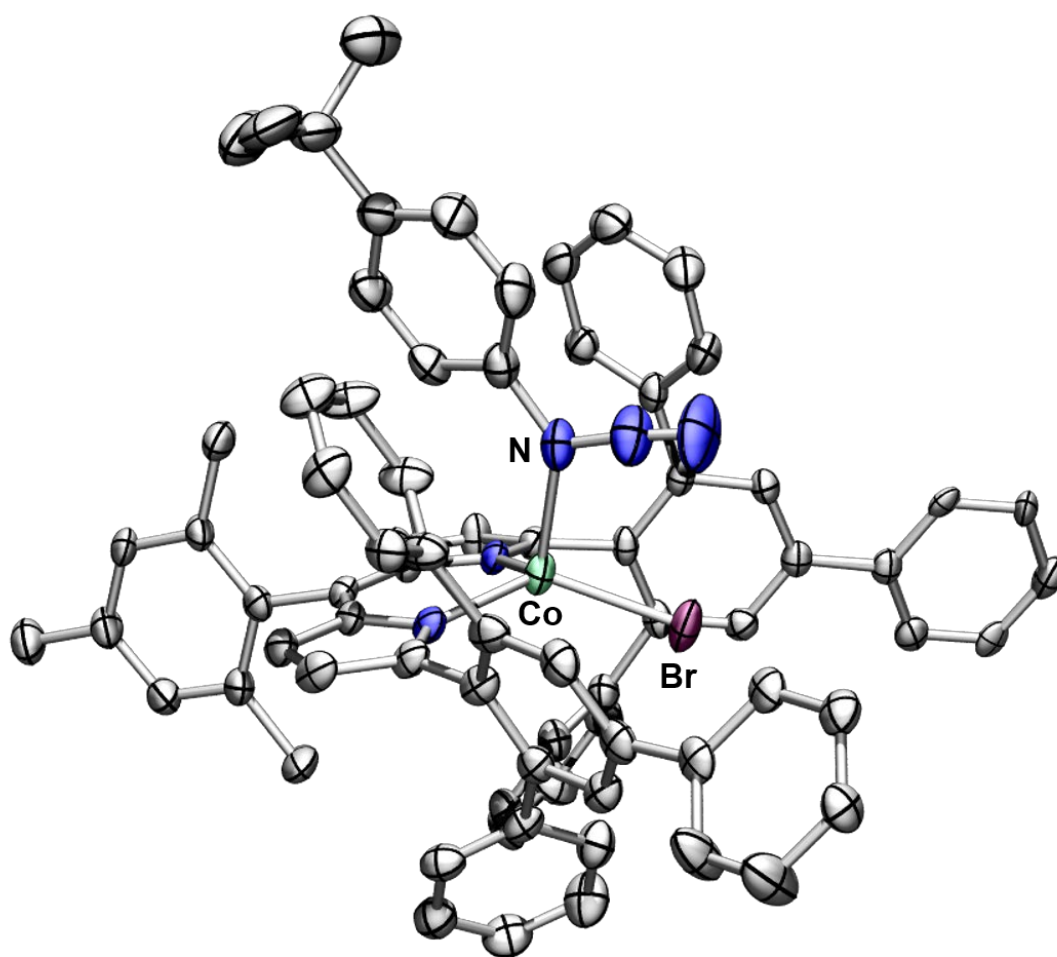

**Figure S-34.** Solid-state molecular structure for  $(A^rL)CoBr(N_3(C_6H_4-p-tBu))$  (**3**) with thermal ellipsoids at 50% probability level. Hydrogens omitted for clarity.

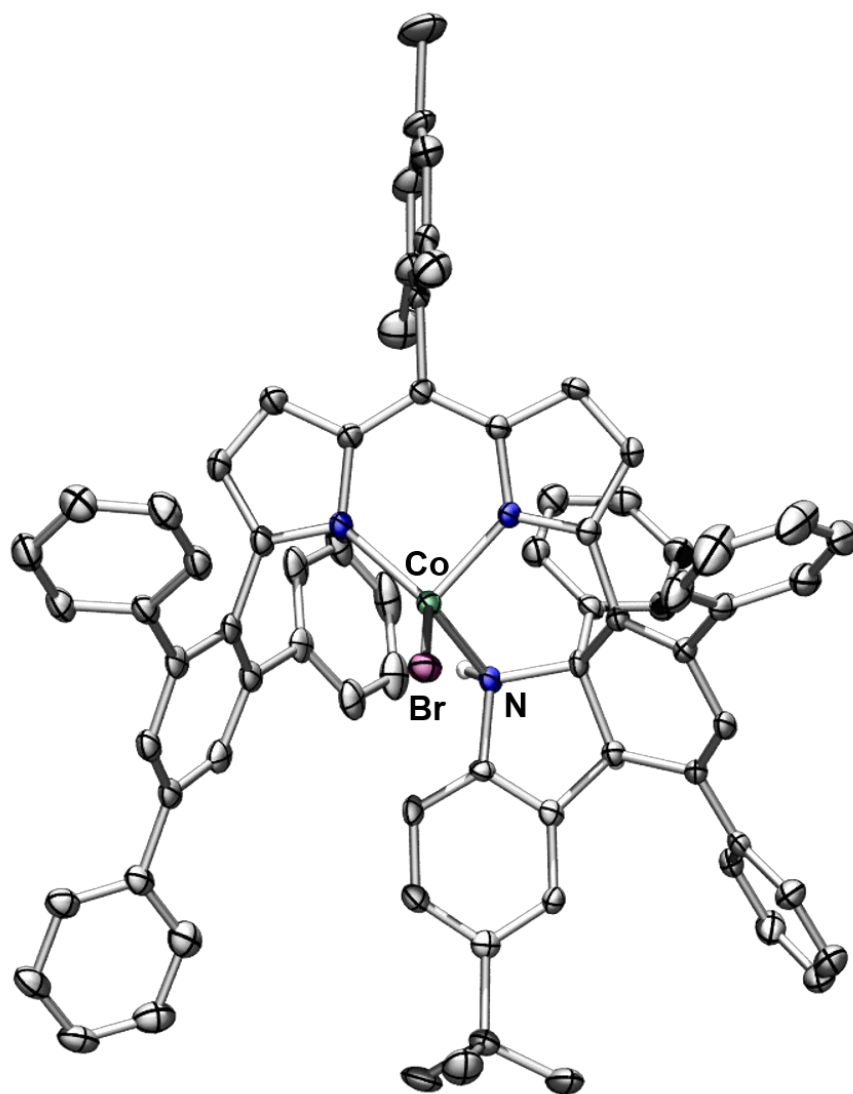

**Figure S-35.** Solid-state molecular structure for (<sup>Ar</sup>L)CoBr([3+2]annulation) (**4**) with thermal ellipsoids at 50% probability level. Hydrogens omitted for clarity.

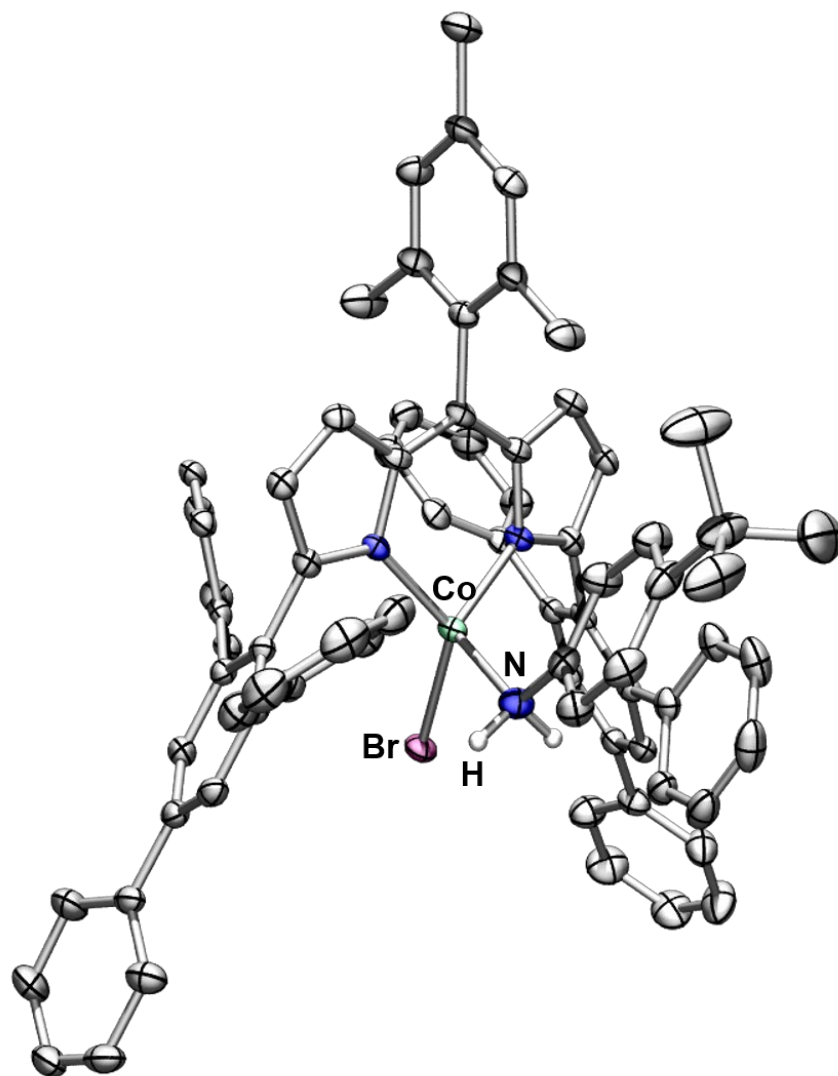

**Figure S-36.** Solid-state molecular structure for  $(A^rL)CoBr(NH_2(C_6H_4-p-Bu))$  (**5**) with thermal ellipsoids at 50% probability level. Hydrogens omitted for clarity, except of aniline  $NH_2$ .

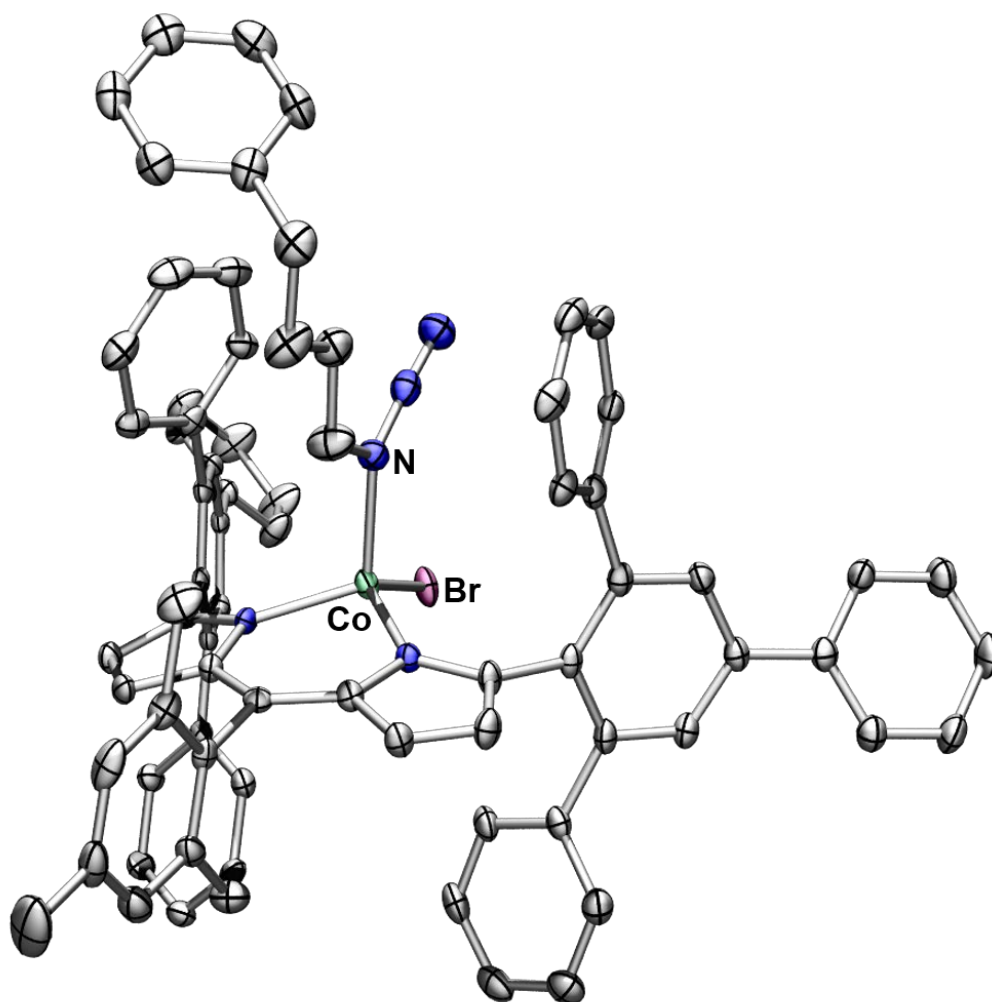

**Figure S-37.** Solid-state molecular structure for  $(A^L)CoBr(N_3R)$  (7) with thermal ellipsoids at 50% probability level. Hydrogens omitted for clarity.

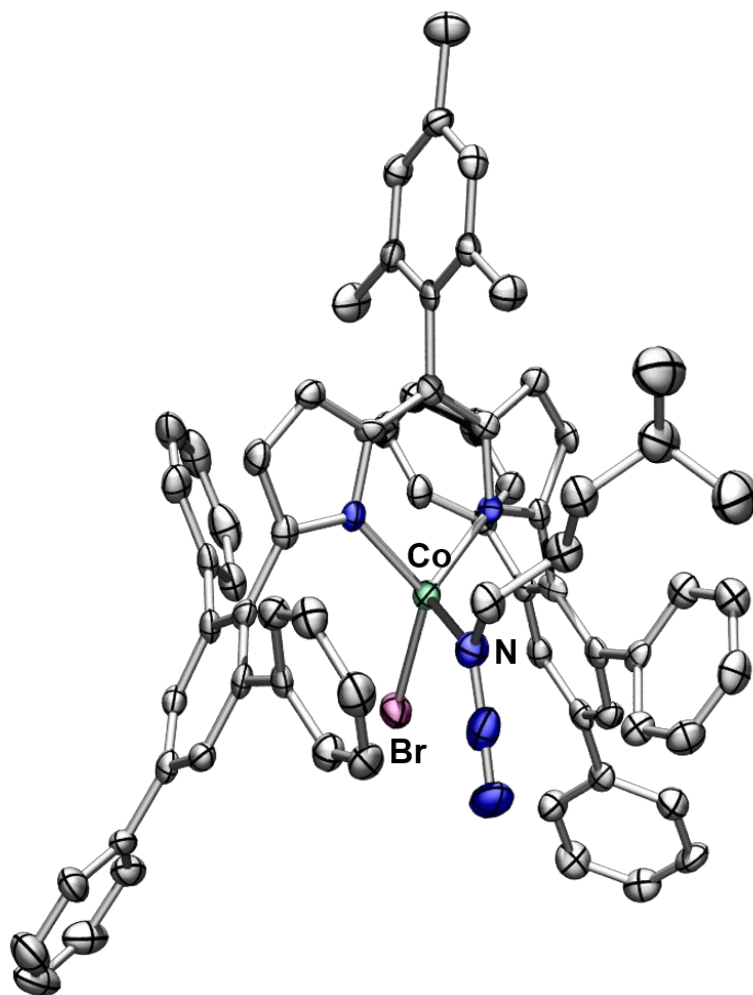

**Figure S-38.** Solid-state molecular structure for  $(^A rL)CoBr(N_3R)$  (**8**) with thermal ellipsoids at 50% probability level. Hydrogens omitted for clarity.

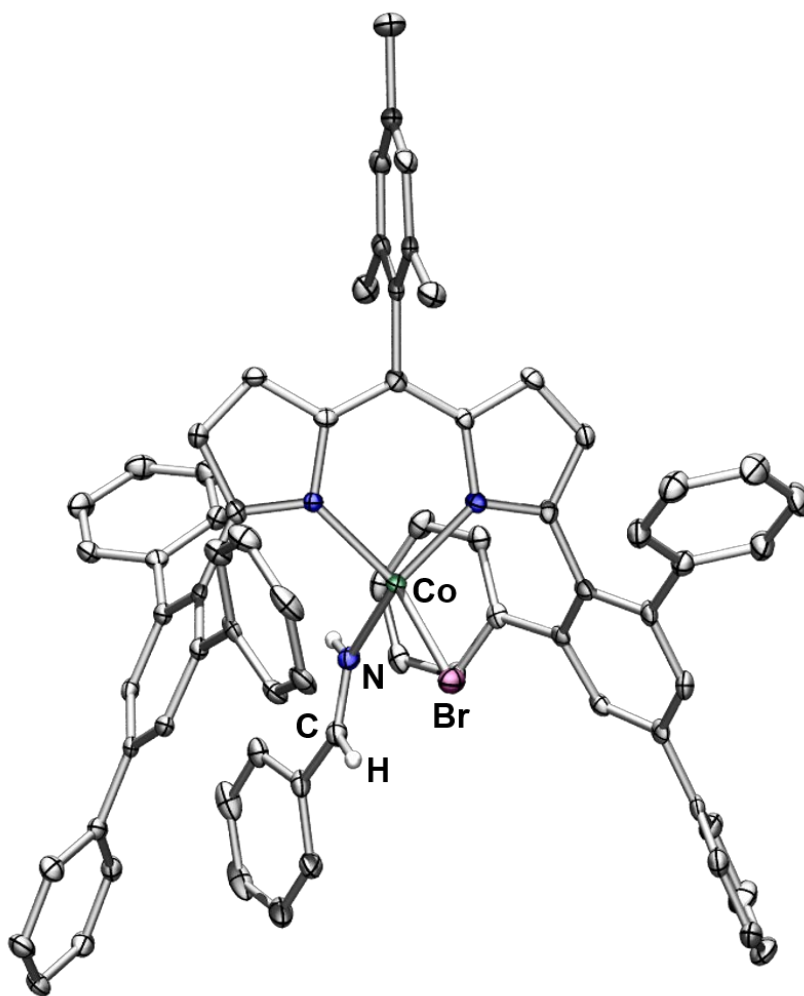

**Figure S-39.** Solid-state molecular structure for ( $^{Ar}L$ )CoBr(NHCHC<sub>6</sub>H<sub>5</sub>) (**9**) with thermal ellipsoids at 50% probability level. Hydrogens omitted for clarity, except for the imine  $HN=CHPh$ .

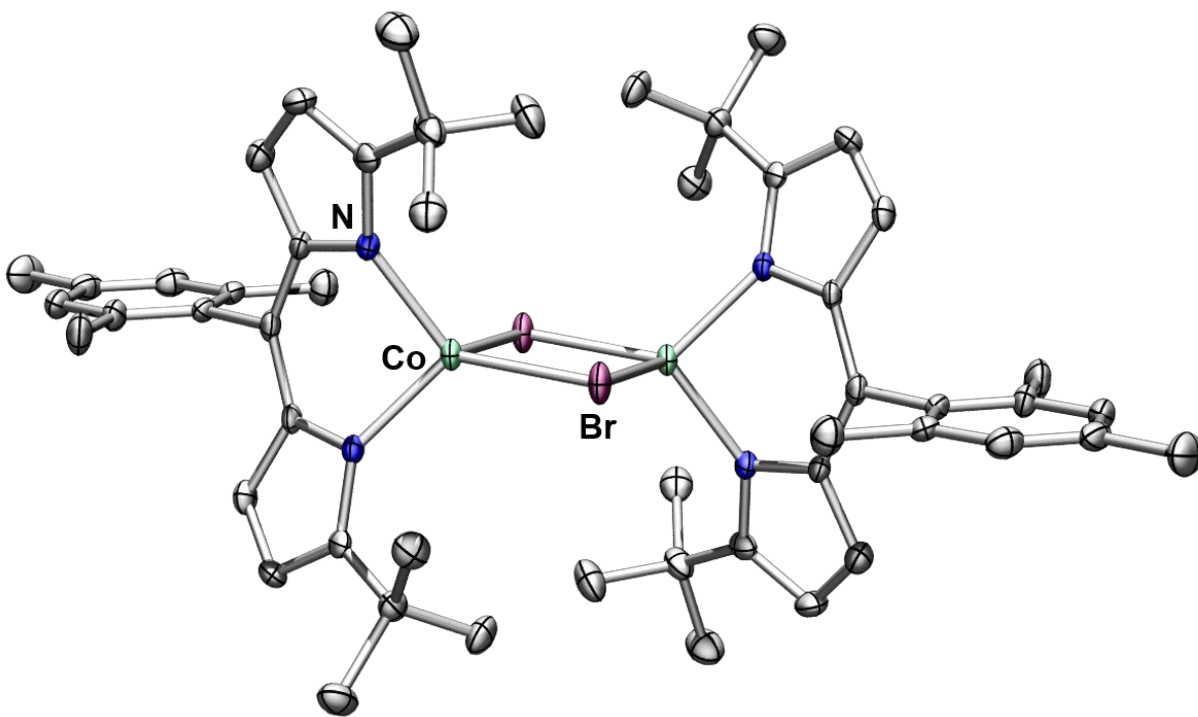

**Figure S-40.** Solid-state molecular structure for  $[(t\text{BuL})\text{CoBr}]_2$  (**11**) with thermal ellipsoids at 50% probability level. Hydrogens omitted for clarity.

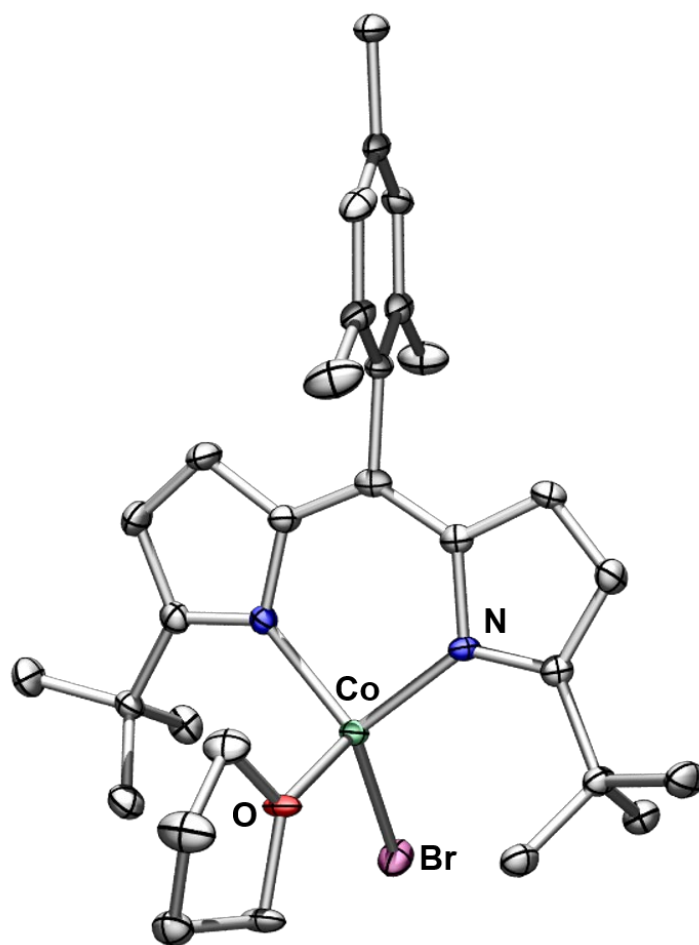

**Figure S-41.** Solid-state molecular structure for (<sup>tBu</sup>L)CoBr(thf) (**12**) with thermal ellipsoids at 50% probability level. Hydrogens omitted for clarity.



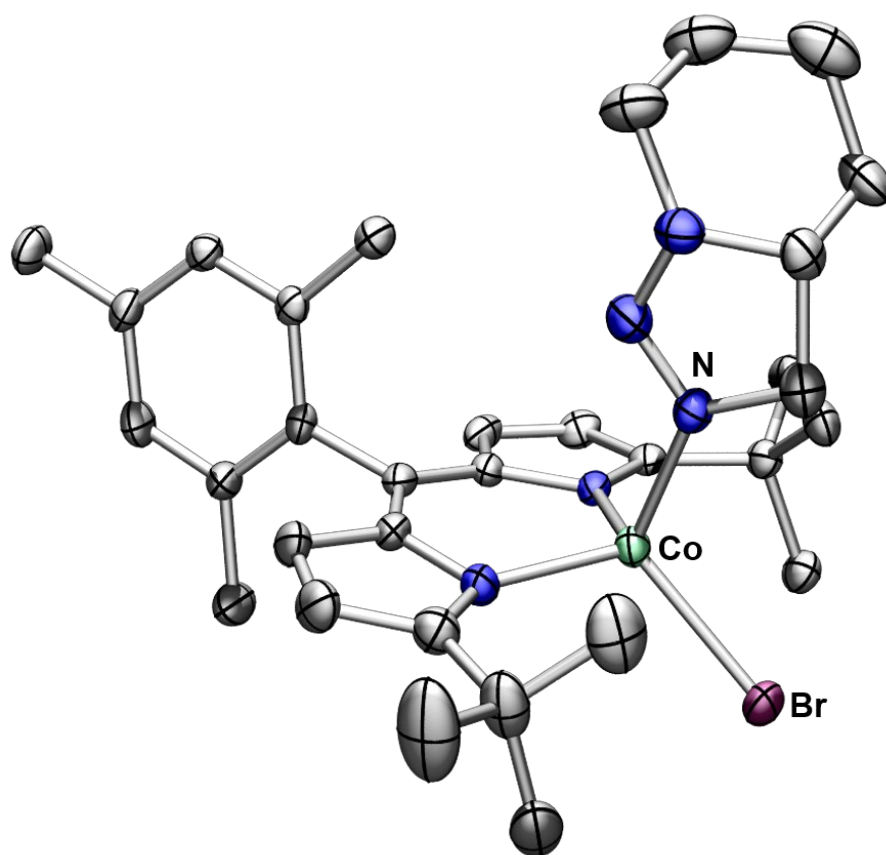

**Figure S-42.** Solid-state molecular structure for ( $t\text{BuL}$ )CoBr(1,2,3-dihydrotriazole) (**14-Br**) with thermal ellipsoids at 50% probability level. Hydrogens omitted for clarity.

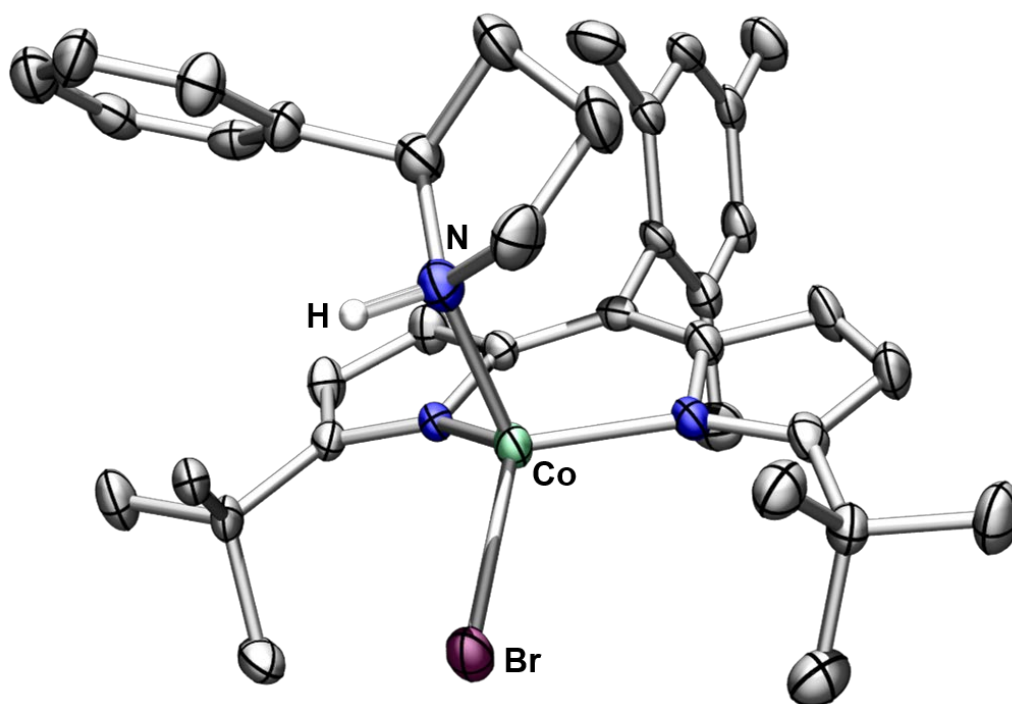

**Figure S-43.** Solid-state molecular structure for (*t*BuL)CoBr(2-phenylpyrrolidine) (**16-Br**) with thermal ellipsoids at 50% probability level. Hydrogens omitted for clarity, except for the pyrrolidine *NH*.

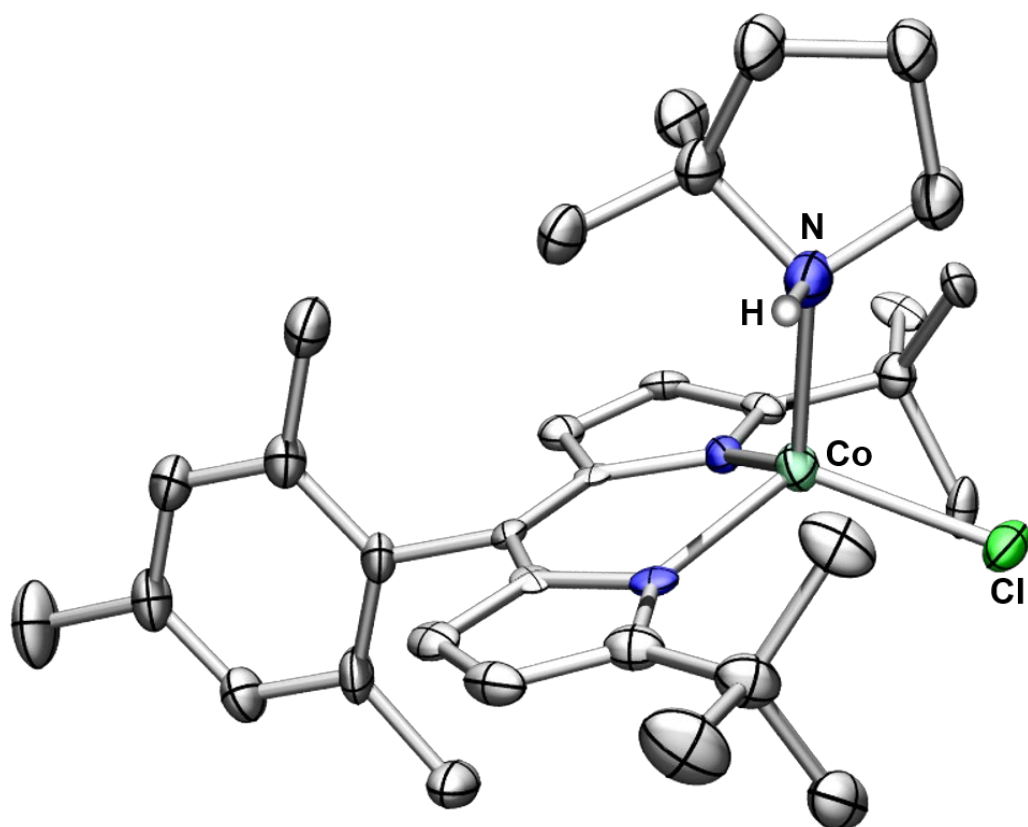

**Figure S-44.** Solid-state molecular structure for (*t*BuL)CoCl(2,2-dimethylpyrrolidine) (**18**) with thermal ellipsoids at 50% probability level. Hydrogens omitted for clarity, except for the pyrrolidine *NH*

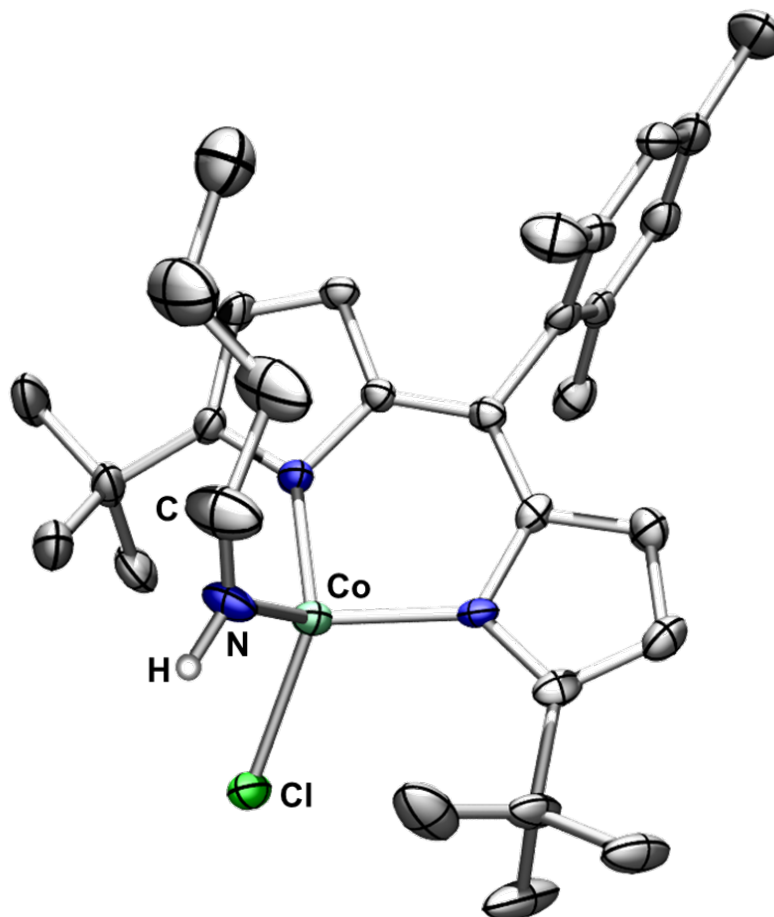

**Figure S-45.** Solid-state molecular structure for (*t*BuL)CoCl(NHCH(CH<sub>2</sub>)CH<sub>3</sub>) (**20**) with thermal ellipsoids at 50% probability level. Hydrogens omitted for clarity, except for the imine *HN=CHR*.

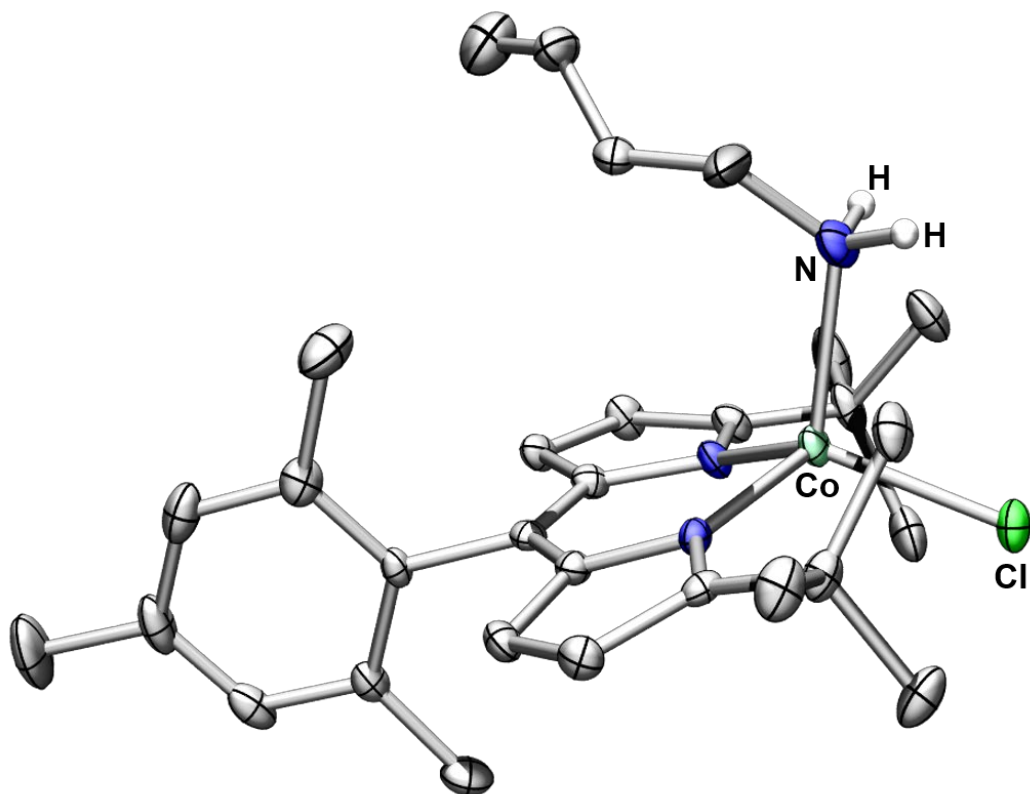

**Figure S-46.** Solid-state molecular structure for  $({}^t\text{BuL})\text{CoCl}(n\text{-BuNH}_2)$  (**21**) with thermal ellipsoids at 50% probability level. Hydrogens omitted for clarity, except for the amine  $\text{NH}_2$ .

**Computational Methods.** Single point calculations and property calculations for complex **3** were carried out utilizing the ORCA 3.0.3<sup>17</sup> and package. All geometries were taken from the X-ray structure of compound **3** and the B3LYP<sup>18-19</sup> functional was used with the def2-TZVP (Co, N, Br) and def2-SV(P) (C, H) basis sets.<sup>20-22</sup> Additionally, the def2-TZVP/J (Co, N, Br) and def2-SVP/J (C, H) auxiliary basis sets were employed to utilize the RIJCOSX approximation for accelerating the calculation.<sup>23</sup> Geometry optimizations for complex **8-N<sub>2</sub>** considering all possible electronic configuration scenarios were carried out using ORCA 4.0.1.2 program.<sup>24</sup> To minimize computational effort and facilitate convergence while retaining the overall structural environment of the molecule, the *para*-substituted phenyl groups of the 2,4,6-triphenylphenyl substituents were truncated to methyl units, and Br ancillary ligand was replaced with a Cl. The B3LYP<sup>18-19</sup> functional was used with the def2-TZVP (Co, N, Cl) and def2-SV(P) (C, H) basis sets.<sup>20-22</sup> Additionally, the def2-TZVP/J (Co, N, Cl) and def2-SVP/J (C, H) auxiliary basis sets were employed to utilize the RIJCOSX approximation for accelerating the calculation.<sup>23</sup>

**Summary of results.** We have performed theoretical studies on the proposed Co-nitrene complex with **8-N<sub>2</sub>** as a model complex using ORCA (B3LYP functional, def2-TZVP for Co, N, Cl and def2-SVP/J for C, H). To minimize computational effort and facilitate convergence while retaining the overall structural environment of the molecule, the *para*-substituted phenyl groups of the 2,4,6-triphenylphenyl substituents were truncated to methyl units, and Br ancillary ligand was replaced with a Cl. As there is no direct spectroscopic evidence to assess either the formal oxidation state of the metal center (Co<sup>3+</sup> vs. Co<sup>4+</sup>) or the electronic configuration of the compound (the spin-state of Co and the nature of the nitrene (NR) unit (e.g., imido (NR<sup>2-</sup>), iminyl (<sup>2</sup>NR<sup>1-</sup>), nitrene adduct (<sup>3</sup>NR)), we have performed geometry optimizations for **8-N<sub>2</sub>** considering all possible electronic configuration scenarios. First, in the case of Co(IV) imido (which is equivalent with the bound nitrene unit being a dianionic imido (NR<sup>2-</sup>)), we have considered the  $S = 1/2$ ,  $3/2$ , and  $5/2$  spin states (Co<sup>4+</sup> = d<sup>5</sup>). Among these, the  $S = 1/2$  spin state is about 6.214 and 3.579 kcal/mol more stable with respect to the  $S = 3/2$  and  $S = 5/2$  states, respectively, suggesting that **8-N<sub>2</sub>** might be best described as a doublet. However, we found that there is significant spin density localized on the N<sub>α</sub>. Specifically, Mulliken spin population analysis suggests + 2.45 (α) spin density on the Co and - 1.55 (β) spin density on the N<sub>α</sub>, indicating that the nitrene (NR) moiety is more likely an open-shell iminyl (<sup>2</sup>NR<sup>1-</sup>) as opposed to a closed-shell imido (NR<sup>2-</sup>), and consequently, the

oxidation state of the Co would be 3+ rather than 4+. To this end, we have conducted a broken-symmetry calculation on **8**-N<sub>2</sub> at  $S = 1$  and  $S = 2$  spin states for a d<sup>6</sup> Co(III) center along with an  $S = 1/2$  nitrene moiety (We note that a low-spin  $S = 0$  state Co(III) along with an  $S = 1/2$  NR is equivalent to the previous  $S = 1/2$  Co(IV) case as a computational input). As a result, in both cases, the calculation converged to the broken symmetry solution, suggesting anti-ferromagnetic coupling state between the Co and NR fragment to result in a net doublet ( $S_{\text{Co}}(1) - S_{\text{NR}}(1/2)$ ) and quartet state ( $S_{\text{Co}}(2) - S_{\text{NR}}(1/2)$ ), respectively. Furthermore, the anti-ferromagnetically coupled doublet state was found to be more stable than the overall quartet spin state by 5.513 kcal/mol. Therefore, we believe these computational results are in accord with our proposal suggesting that **8**-N<sub>2</sub> is more likely a Co(III) iminyl as opposed to a Co(IV) imido. However, to better understand the exact spin configuration of the compound (e.g., low-spin Co(III) vs. intermediate-spin Co(III) vs. high-spin Co(III)), in-depth spectroscopic analysis using X-ray absorption or EPR spectroscopies are necessary and we are currently pursuing such spectroscopic characterization of this species.

**Table S-4.** Summary of the geometry optimized results of **8**-N<sub>2</sub> as Co(IV) imido at the  $S = 1/2$ ,  $3/2$ , and  $5/2$  spin states.

|                                | $S = 1/2$ model | $S = 3/2$ model | $S = 5/2$ model |
|--------------------------------|-----------------|-----------------|-----------------|
| Co-N <sub>α</sub> (Å)          | 1.877           | 1.764           | 1.95            |
| Spin density on Co             | + 2.453         | + 2.659         | + 2.742         |
| Spin density on N <sub>α</sub> | - 1.545         | - 0.035         | + 1.744         |
| Relative energy (kcal/mol)     | 0               | + 6.214         | + 3.579         |

**Table S-5.** Summary of the broken-symmetry<sup>25</sup> geometry optimized results of **8**-N<sub>2</sub> as Co(III) iminyl at the  $S = 1$  and  $S = 2$  spin states.

|                                | $S = 1$ Co and $S = 1/2$ NR<br>model | $S = 2$ Co and $S = 1/2$ NR<br>model |
|--------------------------------|--------------------------------------|--------------------------------------|
| Co-N <sub>α</sub> (Å)          | 1.883                                | 1.764                                |
| Spin density on Co             | + 2.465                              | + 2.659                              |
| Spin density on N <sub>α</sub> | - 1.552                              | - 0.037                              |
| Relative energy (kcal/mol)     | 0                                    | + 5.513                              |



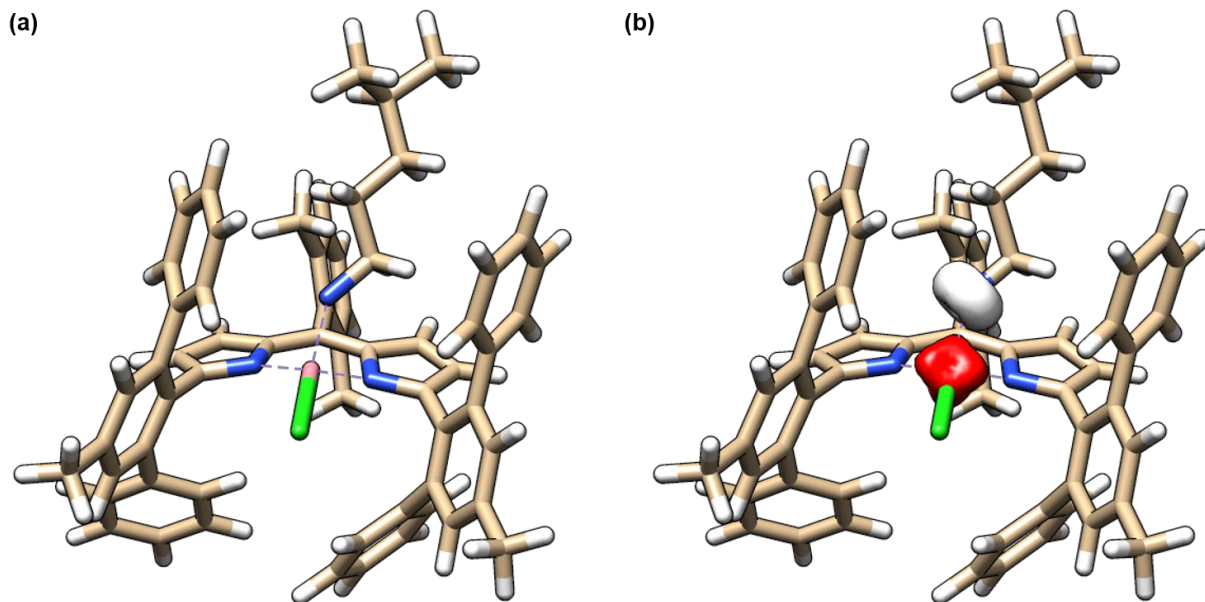

**Figure S-47.** Geometry optimized molecular structure and Mulliken spin density plot ( $\alpha-\beta$ ) of **8-N<sub>2</sub>** at an  $S = 1/2$  spin state of Co(IV).

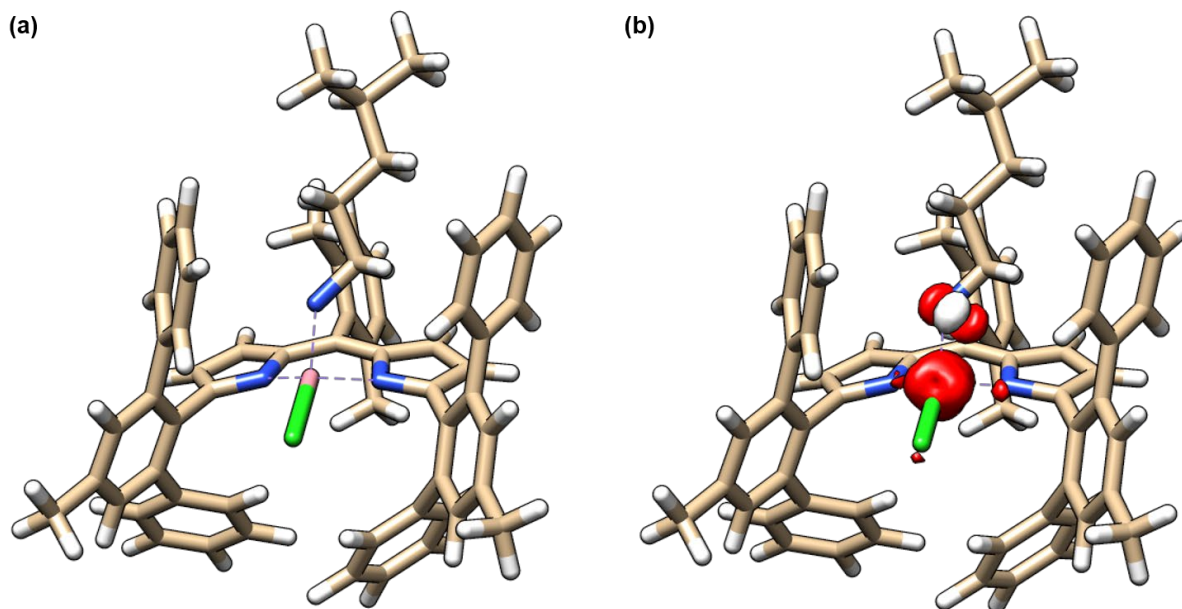

**Figure S-48.** Geometry optimized molecular structure and Mulliken spin density plot ( $\alpha-\beta$ ) of **8-N<sub>2</sub>** at an  $S = 3/2$  spin state of Co(IV).

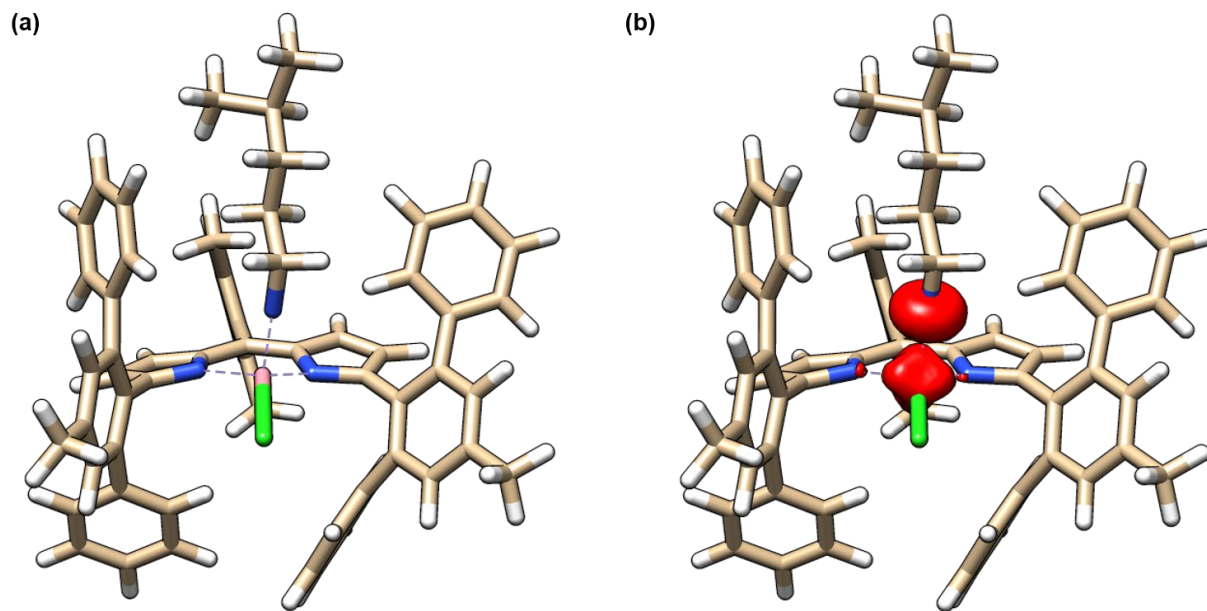

**Figure S-49.** Geometry optimized molecular structure and Mulliken spin density plot ( $\alpha-\beta$ ) of  $8\text{-N}_2$  at an  $S = 5/2$  spin state of Co(IV).

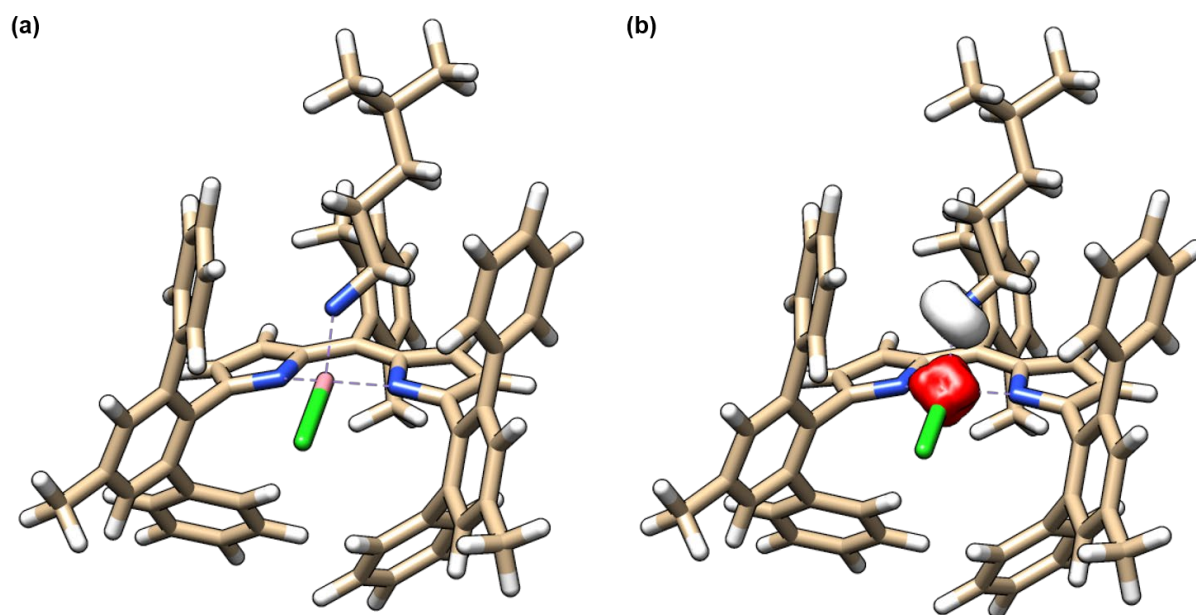

**Figure S-50.** Geometry optimized molecular structure and Mulliken spin density plot ( $\alpha-\beta$ ) of  $8\text{-N}_2$  at an  $S = 1$  spin state of Co(III).

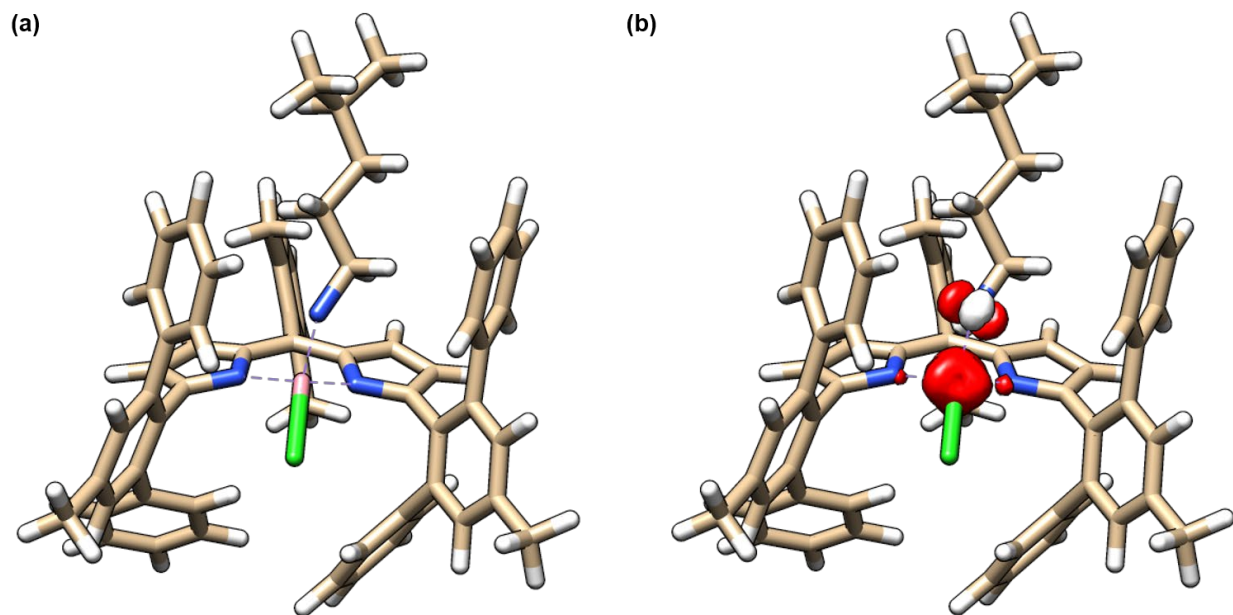

**Figure S-51.** Geometry optimized molecular structure and Mulliken spin density plot ( $\alpha-\beta$ ) of **8-N<sub>2</sub>** at an  $S = 2$  spin state of Co(III)

**Table S-6.** Coordinates of optimized molecular structure for the truncated Co-nitrenoid (**8-N<sub>2</sub>**) at low-spin Co(IV) state.

Doublet ( $S = 1/2$ )

|    |          |           |           |
|----|----------|-----------|-----------|
| Co | 6.181532 | 18.346355 | 7.941508  |
| N  | 5.186259 | 19.891963 | 7.181055  |
| N  | 5.703836 | 17.072267 | 6.467815  |
| C  | 6.248266 | 15.927470 | 6.035387  |
| N  | 4.981662 | 18.001664 | 9.343581  |
| C  | 3.979178 | 19.612167 | 6.532219  |
| C  | 8.648817 | 15.362445 | 5.620667  |
| C  | 7.548478 | 15.389504 | 6.518886  |
| C  | 4.507094 | 17.264032 | 5.766980  |
| C  | 5.161939 | 21.184095 | 7.569959  |
| C  | 5.406742 | 21.932379 | 10.584083 |
| C  | 8.123159 | 17.151707 | 3.900301  |
| C  | 3.180580 | 20.793001 | 6.551705  |
| C  | 7.438383 | 22.196799 | 7.313491  |
| C  | 7.470363 | 21.913653 | 5.844642  |
| C  | 4.323632 | 16.153110 | 4.878732  |
| C  | 2.335512 | 18.312329 | 5.178468  |
| C  | 6.346910 | 21.876874 | 8.163983  |

|   |           |           |           |
|---|-----------|-----------|-----------|
| C | 3.674581  | 18.393660 | 5.868136  |
| C | 4.088006  | 22.417274 | 10.520435 |
| C | 9.888129  | 14.872586 | 6.055942  |
| C | 7.718298  | 14.887167 | 7.832739  |
| C | 8.986848  | 14.423613 | 8.226142  |
| C | 7.593818  | 22.870228 | 10.013195 |
| C | 6.438275  | 22.224426 | 9.538772  |
| C | 2.121354  | 18.962187 | 3.939077  |
| C | 0.847098  | 18.895336 | 3.353490  |
| C | 5.422096  | 15.332693 | 5.029356  |
| C | 10.085502 | 14.413134 | 7.364072  |
| C | 8.535199  | 15.842474 | 4.209149  |
| C | 6.608993  | 14.768029 | 8.826081  |
| C | 8.571113  | 22.840959 | 7.838146  |
| C | 8.672137  | 23.192185 | 9.185903  |
| C | 1.288553  | 17.583751 | 5.796877  |
| C | 8.031667  | 17.577360 | 2.571759  |
| C | 0.028492  | 17.549970 | 5.180970  |
| C | 5.852103  | 14.917589 | 11.145208 |
| C | 3.925313  | 21.775886 | 7.188902  |
| C | 6.831574  | 15.123789 | 10.171127 |
| C | 5.802740  | 21.254201 | 11.757060 |
| C | 4.375306  | 14.012605 | 9.461048  |
| C | 5.358480  | 14.215386 | 8.488226  |
| C | 6.545452  | 22.493356 | 4.958163  |
| C | 4.619876  | 14.354528 | 10.795813 |
| C | 8.871199  | 14.981560 | 3.148111  |
| C | 8.530164  | 21.158742 | 5.306513  |
| C | 6.688491  | 22.342183 | 3.574907  |
| C | 3.860419  | 18.627071 | 9.919328  |
| C | 1.712330  | 18.337033 | 11.261129 |
| C | 4.922920  | 21.083317 | 12.829511 |
| C | 2.965599  | 17.640805 | 10.710468 |
| C | 1.502865  | 16.833094 | 7.092502  |
| C | 8.349017  | 16.704736 | 1.525495  |
| C | 3.203882  | 22.242542 | 11.590696 |
| C | 7.761202  | 21.610381 | 3.052068  |
| C | 3.618757  | 21.586340 | 12.754595 |
| C | 8.676397  | 21.010182 | 3.923834  |
| C | 3.236717  | 19.691338 | 3.222238  |
| C | 8.773500  | 15.405091 | 1.818896  |
| C | 0.663793  | 17.404342 | 11.904155 |
| C | 1.239998  | 16.561770 | 13.052011 |
| C | -0.548668 | 18.219880 | 12.381515 |
| H | 0.676277  | 19.398309 | 2.396350  |
| H | -0.785122 | 16.996661 | 5.661823  |

|   |           |           |           |
|---|-----------|-----------|-----------|
| H | 1.977484  | 17.468882 | 7.859206  |
| H | 0.545951  | 16.460963 | 7.497332  |
| H | 2.171308  | 15.965303 | 6.949453  |
| H | 4.042538  | 18.994834 | 2.927153  |
| H | 2.859597  | 20.180859 | 2.308620  |
| H | 3.704408  | 20.462644 | 3.856240  |
| H | 3.479942  | 16.018766 | 4.202372  |
| H | 5.647971  | 14.410150 | 4.495947  |
| H | 9.199795  | 13.961618 | 3.371841  |
| H | 9.031664  | 14.714321 | 1.009983  |
| H | 8.268319  | 17.040749 | 0.485862  |
| H | 7.707916  | 18.600656 | 2.358659  |
| H | 7.884670  | 17.849517 | 4.707395  |
| H | 10.729146 | 14.879196 | 5.354365  |
| H | 9.105786  | 14.026070 | 9.237572  |
| H | 5.160798  | 13.908095 | 7.458586  |
| H | 3.419559  | 13.562699 | 9.172252  |
| H | 3.855113  | 14.179014 | 11.559534 |
| H | 6.055328  | 15.207097 | 12.182075 |
| H | 7.780306  | 15.588254 | 10.452078 |
| H | 3.754499  | 22.968144 | 9.639590  |
| H | 2.188624  | 22.645463 | 11.519156 |
| H | 2.931497  | 21.472636 | 13.599115 |
| H | 5.263939  | 20.557179 | 13.727293 |
| H | 6.818548  | 20.854510 | 11.823844 |
| H | 5.720733  | 23.091746 | 5.355079  |
| H | 5.966281  | 22.815975 | 2.902239  |
| H | 7.888174  | 21.512180 | 1.968312  |
| H | 9.509826  | 20.422493 | 3.525485  |
| H | 9.241752  | 20.680032 | 5.985548  |
| H | 9.386644  | 23.096756 | 7.154458  |
| H | 7.633372  | 23.148847 | 11.070562 |
| H | 3.650741  | 22.821817 | 7.322656  |
| H | 2.193725  | 20.900466 | 6.103540  |
| H | 4.215756  | 19.440889 | 10.587803 |
| H | 3.268407  | 19.120589 | 9.115493  |
| H | 3.566869  | 17.206806 | 11.526530 |
| H | 2.688465  | 16.802879 | 10.046504 |
| H | 2.021670  | 19.098876 | 12.003220 |
| H | 1.222977  | 18.896361 | 10.439069 |
| H | 0.313465  | 16.704106 | 11.119290 |
| H | 2.023515  | 15.866062 | 12.701660 |
| H | 1.686741  | 17.206811 | 13.833182 |
| H | 0.451072  | 15.954112 | 13.533207 |
| H | -1.001772 | 18.795860 | 11.553306 |
| H | -1.331892 | 17.565404 | 12.806110 |

|    |           |           |           |
|----|-----------|-----------|-----------|
| H  | -0.253742 | 18.940689 | 13.167879 |
| Cl | 8.312717  | 18.574888 | 8.494342  |
| C  | 9.898695  | 23.881182 | 9.738153  |
| H  | 9.629381  | 24.629327 | 10.504603 |
| H  | 10.579433 | 23.151686 | 10.219326 |
| H  | 10.469793 | 24.392952 | 8.944052  |
| C  | 11.436251 | 13.906494 | 7.816053  |
| H  | 11.703399 | 12.958910 | 7.310895  |
| H  | 12.235044 | 14.633618 | 7.582294  |
| H  | 11.455096 | 13.721125 | 8.903712  |
| C  | -0.196935 | 18.206436 | 3.970807  |
| H  | -1.186441 | 18.175448 | 3.502709  |

**Table S-7.** Coordinates of optimized molecular structure for the truncated Co-nitrenoid (**8-N<sub>2</sub>**) at intermediate-spin Co(IV) state.

Quartet ( $S = 3/2$ )

|    |          |           |           |
|----|----------|-----------|-----------|
| Co | 6.220597 | 18.384996 | 8.068425  |
| N  | 5.214858 | 19.916191 | 7.189722  |
| N  | 5.651378 | 17.038960 | 6.667357  |
| C  | 6.159123 | 15.849809 | 6.305175  |
| N  | 5.077328 | 18.211280 | 9.400098  |
| C  | 4.022097 | 19.633699 | 6.515872  |
| C  | 8.471748 | 15.210993 | 5.650748  |
| C  | 7.496950 | 15.311575 | 6.680238  |
| C  | 4.445043 | 17.206753 | 5.977825  |
| C  | 5.226517 | 21.238065 | 7.462379  |
| C  | 5.274778 | 22.069339 | 10.448494 |
| C  | 7.950503 | 17.080172 | 4.026886  |
| C  | 3.277573 | 20.842834 | 6.391399  |
| C  | 7.500851 | 22.282981 | 7.302251  |
| C  | 7.617879 | 21.955676 | 5.846066  |
| C  | 4.203528 | 16.033282 | 5.193311  |
| C  | 2.383037 | 18.330332 | 5.173916  |
| C  | 6.373486 | 21.954436 | 8.099137  |
| C  | 3.674740 | 18.381496 | 5.950790  |
| C  | 3.943985 | 22.477676 | 10.245303 |
| C  | 9.717915 | 14.633382 | 5.926415  |
| C  | 7.813688 | 14.829608 | 7.972799  |
| C  | 9.091755 | 14.287093 | 8.208958  |
| C  | 7.481752 | 23.033172 | 9.985877  |
| C  | 6.371261 | 22.344295 | 9.466592  |
| C  | 2.315803 | 18.915660 | 3.885949  |
| C  | 1.091227 | 18.896673 | 3.199871  |
| C  | 5.279815 | 15.194697 | 5.386977  |

|   |           |           |           |
|---|-----------|-----------|-----------|
| C | 10.054737 | 14.170211 | 7.203381  |
| C | 8.239370  | 15.724664 | 4.265312  |
| C | 6.846391  | 14.805105 | 9.110595  |
| C | 8.586416  | 22.969366 | 7.870777  |
| C | 8.599013  | 23.357985 | 9.212494  |
| C | 1.243798  | 17.708456 | 5.740363  |
| C | 7.792115  | 17.557251 | 2.721994  |
| C | 0.038792  | 17.715469 | 5.020986  |
| C | 6.408459  | 15.128404 | 11.492428 |
| C | 4.038566  | 21.846573 | 6.968144  |
| C | 7.248619  | 15.254456 | 10.383215 |
| C | 5.599699  | 21.485282 | 11.691356 |
| C | 4.722137  | 14.113433 | 10.089665 |
| C | 5.561839  | 14.245063 | 8.979994  |
| C | 6.771722  | 22.535538 | 4.884703  |
| C | 5.144140  | 14.545770 | 11.352167 |
| C | 8.373276  | 14.865583 | 3.159604  |
| C | 8.678394  | 21.144273 | 5.402927  |
| C | 6.987879  | 22.318625 | 3.519461  |
| C | 3.889354  | 18.660693 | 9.992271  |
| C | 1.677806  | 18.223764 | 11.161200 |
| C | 4.638778  | 21.329792 | 12.694277 |
| C | 2.957325  | 17.586794 | 10.596417 |
| C | 1.293642  | 17.044918 | 7.098544  |
| C | 7.911521  | 16.689393 | 1.631306  |
| C | 2.979297  | 22.321026 | 11.245908 |
| C | 8.051738  | 21.516066 | 3.091571  |
| C | 3.322094  | 21.753957 | 12.477844 |
| C | 8.892117  | 20.922459 | 4.039341  |
| C | 3.530847  | 19.542394 | 3.234075  |
| C | 8.203683  | 15.340358 | 1.854872  |
| C | 0.635791  | 17.250425 | 11.751920 |
| C | 1.198475  | 16.407941 | 12.906909 |
| C | -0.615694 | 18.023780 | 12.201537 |
| H | 1.033525  | 19.355589 | 2.207949  |
| H | -0.845780 | 17.243897 | 5.461611  |
| H | 1.671615  | 17.736508 | 7.871647  |
| H | 0.290737  | 16.703772 | 7.407867  |
| H | 1.963754  | 16.167555 | 7.102881  |
| H | 4.366851  | 18.824053 | 3.160161  |
| H | 3.289936  | 19.893232 | 2.216422  |
| H | 3.909084  | 20.405369 | 3.807638  |
| H | 3.343174  | 15.873395 | 4.545013  |
| H | 5.467468  | 14.227373 | 4.922733  |
| H | 8.603766  | 13.808382 | 3.328590  |
| H | 8.304756  | 14.651841 | 1.009624  |

|    |           |           |           |
|----|-----------|-----------|-----------|
| H  | 7.780499  | 17.067198 | 0.611517  |
| H  | 7.577683  | 18.618910 | 2.562741  |
| H  | 7.866691  | 17.769588 | 4.871318  |
| H  | 10.453664 | 14.565992 | 5.117798  |
| H  | 9.316619  | 13.903034 | 9.208320  |
| H  | 5.227383  | 13.877028 | 8.006653  |
| H  | 3.736895  | 13.651151 | 9.967648  |
| H  | 4.492134  | 14.421733 | 12.223242 |
| H  | 6.748586  | 15.488485 | 12.469315 |
| H  | 8.231788  | 15.718268 | 10.499112 |
| H  | 3.663326  | 22.956560 | 9.307341  |
| H  | 1.956413  | 22.666777 | 11.063796 |
| H  | 2.570109  | 21.648414 | 13.266243 |
| H  | 4.924348  | 20.872518 | 13.647521 |
| H  | 6.623684  | 21.143788 | 11.869703 |
| H  | 5.952579  | 23.184098 | 5.207849  |
| H  | 6.327903  | 22.792958 | 2.786187  |
| H  | 8.230436  | 21.356187 | 2.022666  |
| H  | 9.718255  | 20.280925 | 3.716489  |
| H  | 9.331185  | 20.673198 | 6.142186  |
| H  | 9.433034  | 23.227811 | 7.226803  |
| H  | 7.451432  | 23.350588 | 11.032448 |
| H  | 3.803990  | 22.910540 | 7.006508  |
| H  | 2.312284  | 20.946471 | 5.898159  |
| H  | 4.166375  | 19.399654 | 10.776676 |
| H  | 3.342904  | 19.259593 | 9.225993  |
| H  | 3.513218  | 17.046874 | 11.381290 |
| H  | 2.709518  | 16.841933 | 9.820314  |
| H  | 1.955368  | 18.960780 | 11.940355 |
| H  | 1.189215  | 18.808934 | 10.356335 |
| H  | 0.330602  | 16.553783 | 10.945930 |
| H  | 2.015392  | 15.742191 | 12.575522 |
| H  | 1.596752  | 17.055448 | 13.712078 |
| H  | 0.412852  | 15.769244 | 13.352086 |
| H  | -1.062055 | 18.594389 | 11.365977 |
| H  | -1.390838 | 17.341957 | 12.597130 |
| H  | -0.366679 | 18.745461 | 13.002772 |
| Cl | 8.412375  | 18.539655 | 8.113882  |
| C  | 9.773489  | 24.093023 | 9.814679  |
| H  | 9.443941  | 24.828583 | 10.569961 |
| H  | 10.463065 | 23.390082 | 10.322258 |
| H  | 10.356653 | 24.628829 | 9.045441  |
| C  | 11.420207 | 13.575936 | 7.464437  |
| H  | 11.682741 | 12.821065 | 6.701414  |
| H  | 12.204664 | 14.355944 | 7.428152  |
| H  | 11.473907 | 13.090055 | 8.454156  |



|   |           |           |          |
|---|-----------|-----------|----------|
| C | -0.044029 | 18.313286 | 3.763511 |
| H | -0.993785 | 18.320722 | 3.218564 |

**Table S-8.** Coordinates of optimized molecular structure for the truncated Co-nitrenoid (**8-N<sub>2</sub>**) at high-spin Co(IV) state.

Sextet ( $S = 5/2$ )

|    |           |           |           |
|----|-----------|-----------|-----------|
| Co | 6.307190  | 18.595013 | 7.652618  |
| N  | 5.162149  | 20.127499 | 6.956880  |
| N  | 5.544725  | 17.155286 | 6.449617  |
| C  | 5.994059  | 15.934279 | 6.103137  |
| N  | 5.726175  | 18.278778 | 9.487293  |
| C  | 3.940191  | 19.807870 | 6.345918  |
| C  | 8.410153  | 15.287632 | 6.018844  |
| C  | 7.180295  | 15.274251 | 6.722915  |
| C  | 4.403489  | 17.409427 | 5.681178  |
| C  | 5.113975  | 21.436198 | 7.277701  |
| C  | 4.769041  | 22.843769 | 9.897497  |
| C  | 8.527025  | 17.198296 | 4.340438  |
| C  | 3.118881  | 20.978312 | 6.337256  |
| C  | 7.464833  | 22.383988 | 7.190882  |
| C  | 7.702676  | 21.981657 | 5.770158  |
| C  | 4.172018  | 16.289024 | 4.824460  |
| C  | 2.282633  | 18.506252 | 5.033246  |
| C  | 6.236050  | 22.200913 | 7.883221  |
| C  | 3.616500  | 18.578331 | 5.732076  |
| C  | 4.212920  | 24.066401 | 10.321172 |
| C  | 9.553895  | 14.721725 | 6.598066  |
| C  | 7.105264  | 14.588302 | 7.963973  |
| C  | 8.283826  | 14.048659 | 8.511574  |
| C  | 7.116448  | 23.574968 | 9.701197  |
| C  | 6.054545  | 22.851909 | 9.133802  |
| C  | 2.113494  | 19.094787 | 3.757740  |
| C  | 0.853023  | 19.022574 | 3.144246  |
| C  | 5.183233  | 15.380350 | 5.070710  |
| C  | 9.519634  | 14.123959 | 7.863555  |
| C  | 8.507657  | 15.822591 | 4.622229  |
| C  | 5.832052  | 14.290256 | 8.691902  |
| C  | 8.497744  | 23.110916 | 7.807245  |
| C  | 8.355987  | 23.698508 | 9.067387  |
| C  | 1.204758  | 17.847338 | 5.674461  |
| C  | 8.610375  | 17.649087 | 3.018271  |
| C  | -0.040605 | 17.806272 | 5.028894  |
| C  | 4.648955  | 13.934017 | 10.805052 |
| C  | 3.851668  | 21.993646 | 6.917097  |

|   |           |           |           |
|---|-----------|-----------|-----------|
| C | 5.777634  | 14.360395 | 10.099413 |
| C | 4.114512  | 21.656310 | 10.268053 |
| C | 3.567907  | 13.360291 | 8.726512  |
| C | 4.701236  | 13.780627 | 8.023575  |
| C | 6.799283  | 22.338692 | 4.751668  |
| C | 3.536944  | 13.427889 | 10.123032 |
| C | 8.594882  | 14.914356 | 3.551619  |
| C | 8.922125  | 21.385468 | 5.396365  |
| C | 7.115403  | 22.129301 | 3.405944  |
| C | 5.344549  | 18.024122 | 10.806683 |
| C | 3.476966  | 17.423062 | 12.424587 |
| C | 2.956243  | 21.689899 | 11.050419 |
| C | 3.845736  | 17.650125 | 10.952267 |
| C | 1.369006  | 17.193263 | 7.030659  |
| C | 8.675432  | 16.738260 | 1.959864  |
| C | 3.049409  | 24.102419 | 11.095890 |
| C | 8.342232  | 21.559791 | 3.048647  |
| C | 2.419029  | 22.911779 | 11.469873 |
| C | 9.240890  | 21.181174 | 4.051740  |
| C | 3.262119  | 19.780866 | 3.049646  |
| C | 8.672272  | 15.366091 | 2.230377  |
| C | 1.996522  | 17.093644 | 12.706581 |
| C | 1.542603  | 15.760226 | 12.093125 |
| C | 1.742338  | 17.093216 | 14.221223 |
| H | 0.715304  | 19.477779 | 2.158144  |
| H | -0.880797 | 17.305827 | 5.521785  |
| H | 1.810443  | 17.888674 | 7.766917  |
| H | 0.395868  | 16.849865 | 7.422014  |
| H | 2.041733  | 16.318478 | 6.981022  |
| H | 4.123064  | 19.100786 | 2.921858  |
| H | 2.952597  | 20.136000 | 2.052327  |
| H | 3.630433  | 20.651109 | 3.619822  |
| H | 3.356122  | 16.200070 | 4.107881  |
| H | 5.351366  | 14.418548 | 4.587212  |
| H | 8.588129  | 13.839195 | 3.761541  |
| H | 8.728561  | 14.642366 | 1.410614  |
| H | 8.733516  | 17.099703 | 0.927320  |
| H | 8.621216  | 18.724988 | 2.821945  |
| H | 8.487409  | 17.918461 | 5.162967  |
| H | 10.495189 | 14.757239 | 6.039680  |
| H | 8.220561  | 13.507404 | 9.459553  |
| H | 4.718540  | 13.678260 | 6.937534  |
| H | 2.711750  | 12.956301 | 8.175661  |
| H | 2.657904  | 13.083078 | 10.675809 |
| H | 4.642111  | 13.991414 | 11.899418 |
| H | 6.642152  | 14.743819 | 10.650294 |

|    |           |           |           |
|----|-----------|-----------|-----------|
| H  | 4.695534  | 25.002017 | 10.021443 |
| H  | 2.631042  | 25.064655 | 11.409544 |
| H  | 1.508481  | 22.936459 | 12.077021 |
| H  | 2.465325  | 20.754899 | 11.340424 |
| H  | 4.530682  | 20.699125 | 9.943312  |
| H  | 5.854460  | 22.821631 | 5.014060  |
| H  | 6.406219  | 22.436813 | 2.631197  |
| H  | 8.600275  | 21.412618 | 1.994221  |
| H  | 10.198133 | 20.720954 | 3.786216  |
| H  | 9.624278  | 21.073947 | 6.172914  |
| H  | 9.428934  | 23.261721 | 7.253141  |
| H  | 6.962475  | 24.050509 | 10.674330 |
| H  | 3.553032  | 23.031305 | 7.061747  |
| H  | 2.114732  | 21.041724 | 5.921068  |
| H  | 5.973317  | 17.196007 | 11.202894 |
| H  | 5.574938  | 18.922043 | 11.424710 |
| H  | 3.655837  | 16.746964 | 10.349063 |
| H  | 3.232988  | 18.464128 | 10.521398 |
| H  | 4.105912  | 16.608857 | 12.836693 |
| H  | 3.744306  | 18.332598 | 12.997808 |
| H  | 1.381901  | 17.898521 | 12.256237 |
| H  | 1.654593  | 15.737785 | 10.995066 |
| H  | 2.130714  | 14.919609 | 12.506339 |
| H  | 0.478407  | 15.568026 | 12.324435 |
| H  | 1.986750  | 18.070350 | 14.677440 |
| H  | 0.685691  | 16.864050 | 14.452552 |
| H  | 2.363607  | 16.327517 | 14.723195 |
| Cl | 8.522782  | 18.692611 | 7.834301  |
| C  | 9.498409  | 24.445004 | 9.714335  |
| H  | 9.135665  | 25.201801 | 10.431739 |
| H  | 10.158790 | 23.752106 | 10.271935 |
| H  | 10.124422 | 24.957482 | 8.962260  |
| C  | 10.768857 | 13.567633 | 8.507594  |
| H  | 11.435732 | 13.093675 | 7.765424  |
| H  | 11.348382 | 14.371677 | 9.002437  |
| H  | 10.524304 | 12.817450 | 9.279216  |
| C  | -0.219898 | 18.390902 | 3.774379  |
| H  | -1.198382 | 18.352158 | 3.283925  |

**Table S-9.** Coordinates of optimized molecular structure for the truncated Co-nitrenoid (**8-N<sub>2</sub>**) at intermediate-spin Co(III) state. Broken-Symmetry calculation.

Quartet ( $S = 3/2$ )

(2, 1)

|    |          |           |          |
|----|----------|-----------|----------|
| Co | 6.180778 | 18.317814 | 8.003082 |
|----|----------|-----------|----------|

|   |           |           |           |
|---|-----------|-----------|-----------|
| N | 5.176850  | 19.873019 | 7.259372  |
| N | 5.728468  | 17.040019 | 6.511690  |
| C | 6.253184  | 15.887288 | 6.071689  |
| N | 4.971833  | 17.940741 | 9.396691  |
| C | 4.000923  | 19.596583 | 6.553570  |
| C | 8.568187  | 15.275365 | 5.382053  |
| C | 7.600058  | 15.357002 | 6.419473  |
| C | 4.497539  | 17.214071 | 5.862226  |
| C | 5.165905  | 21.183332 | 7.583649  |
| C | 5.108429  | 22.074873 | 10.559990 |
| C | 7.946156  | 17.114090 | 3.753948  |
| C | 3.237855  | 20.797866 | 6.467558  |
| C | 7.470665  | 22.168919 | 7.508107  |
| C | 7.646528  | 21.805695 | 6.066767  |
| C | 4.265121  | 16.077300 | 5.020454  |
| C | 2.367597  | 18.298921 | 5.197926  |
| C | 6.297888  | 21.889026 | 8.256926  |
| C | 3.688123  | 18.362423 | 5.926319  |
| C | 3.800955  | 22.537245 | 10.325316 |
| C | 9.825885  | 14.717674 | 5.648574  |
| C | 7.929680  | 14.867840 | 7.706927  |
| C | 9.217133  | 14.344714 | 7.932495  |
| C | 7.347529  | 22.985351 | 10.167852 |
| C | 6.244818  | 22.311176 | 9.613557  |
| C | 2.224894  | 18.907711 | 3.927760  |
| C | 0.971100  | 18.868027 | 3.297581  |
| C | 5.368550  | 15.260850 | 5.136962  |
| C | 10.177261 | 14.253266 | 6.921150  |
| C | 8.312234  | 15.777981 | 3.997299  |
| C | 6.960401  | 14.813260 | 8.842191  |
| C | 8.545670  | 22.842853 | 8.109187  |
| C | 8.506903  | 23.264420 | 9.440373  |
| C | 1.271406  | 17.637304 | 5.803595  |
| C | 7.754479  | 17.575450 | 2.448150  |
| C | 0.034695  | 17.625090 | 5.140872  |
| C | 6.501134  | 15.108367 | 11.222809 |
| C | 3.975619  | 21.790366 | 7.092773  |
| C | 7.352455  | 15.245282 | 10.123756 |
| C | 5.377618  | 21.474292 | 11.808443 |
| C | 4.825906  | 14.112498 | 9.793220  |
| C | 5.678136  | 14.252126 | 8.694059  |
| C | 6.881494  | 22.409397 | 5.053773  |
| C | 5.235139  | 14.534192 | 11.063617 |
| C | 8.489504  | 14.923820 | 2.893520  |
| C | 8.687858  | 20.935917 | 5.695316  |
| C | 7.162898  | 22.163069 | 3.705432  |

|   |           |           |           |
|---|-----------|-----------|-----------|
| C | 3.900130  | 18.594161 | 10.031329 |
| C | 1.696546  | 18.350994 | 11.289311 |
| C | 4.385802  | 21.353486 | 12.785731 |
| C | 2.919026  | 17.614539 | 10.722872 |
| C | 1.408038  | 16.941209 | 7.139555  |
| C | 7.918992  | 16.712077 | 1.359935  |
| C | 2.804463  | 22.413013 | 11.299042 |
| C | 8.208044  | 21.303219 | 3.348218  |
| C | 3.092354  | 21.827825 | 12.536656 |
| C | 8.964090  | 20.682691 | 4.348427  |
| C | 3.393233  | 19.572473 | 3.231682  |
| C | 8.288534  | 15.382909 | 1.587780  |
| C | 0.603803  | 17.453071 | 11.906583 |
| C | 1.128938  | 16.582792 | 13.058142 |
| C | -0.583179 | 18.312040 | 12.371834 |
| H | 0.855140  | 19.343917 | 2.318756  |
| H | -0.816553 | 17.121901 | 5.611379  |
| H | 1.840153  | 17.612258 | 7.901965  |
| H | 0.427599  | 16.591033 | 7.505570  |
| H | 2.077337  | 16.065170 | 7.074093  |
| H | 4.191715  | 18.842183 | 3.007396  |
| H | 3.073134  | 20.030331 | 2.280721  |
| H | 3.852545  | 20.360085 | 3.851656  |
| H | 3.388872  | 15.925983 | 4.391587  |
| H | 5.566742  | 14.324428 | 4.617068  |
| H | 8.778650  | 13.881819 | 3.065127  |
| H | 8.425862  | 14.697848 | 0.744905  |
| H | 7.760834  | 17.077384 | 0.339499  |
| H | 7.475635  | 18.621164 | 2.285465  |
| H | 7.822202  | 17.802915 | 4.594169  |
| H | 10.558569 | 14.665857 | 4.836025  |
| H | 9.453822  | 13.956325 | 8.927338  |
| H | 5.353015  | 13.891840 | 7.714676  |
| H | 3.842128  | 13.650985 | 9.656061  |
| H | 4.572612  | 14.406529 | 11.926310 |
| H | 6.832668  | 15.458411 | 12.206265 |
| H | 8.330770  | 15.714097 | 10.252235 |
| H | 3.565908  | 23.035640 | 9.385236  |
| H | 1.800951  | 22.799050 | 11.092032 |
| H | 2.315650  | 21.747333 | 13.303852 |
| H | 4.628965  | 20.883584 | 13.744733 |
| H | 6.383819  | 21.095198 | 12.011331 |
| H | 6.076526  | 23.098795 | 5.324829  |
| H | 6.568910  | 22.657608 | 2.930247  |
| H | 8.438999  | 21.119172 | 2.293354  |
| H | 9.774330  | 19.997669 | 4.078772  |

|    |           |           |           |
|----|-----------|-----------|-----------|
| H  | 9.274954  | 20.446790 | 6.477094  |
| H  | 9.427811  | 23.062189 | 7.499280  |
| H  | 7.278706  | 23.323520 | 11.206068 |
| H  | 3.726830  | 22.849221 | 7.159781  |
| H  | 2.280227  | 20.907102 | 5.960996  |
| H  | 4.313981  | 19.308583 | 10.777480 |
| H  | 3.359948  | 19.214822 | 9.281587  |
| H  | 3.464827  | 17.077356 | 11.516514 |
| H  | 2.602658  | 16.851441 | 9.990189  |
| H  | 2.033498  | 19.080878 | 12.050902 |
| H  | 1.237556  | 18.952150 | 10.479357 |
| H  | 0.237802  | 16.772903 | 11.111174 |
| H  | 1.896459  | 15.864506 | 12.718706 |
| H  | 1.579007  | 17.208710 | 13.853037 |
| H  | 0.310646  | 15.998237 | 13.517888 |
| H  | -1.007683 | 18.902780 | 11.539005 |
| H  | -1.393667 | 17.686823 | 12.789409 |
| H  | -0.271183 | 19.022844 | 13.160910 |
| Cl | 8.304894  | 18.541477 | 8.601375  |
| C  | 9.673621  | 23.980911 | 10.078493 |
| H  | 9.335075  | 24.712637 | 10.833367 |
| H  | 10.343370 | 23.264643 | 10.594035 |
| H  | 10.281217 | 24.517461 | 9.328761  |
| C  | 11.555253 | 13.684571 | 7.173212  |
| H  | 11.838352 | 12.953733 | 6.394264  |
| H  | 12.321233 | 14.483548 | 7.158807  |
| H  | 11.616925 | 13.178433 | 8.152215  |
| C  | -0.121052 | 18.242745 | 3.899808  |
| H  | -1.094026 | 18.233088 | 3.397480  |

**Table S-10.** Coordinates of optimized molecular structure for the truncated Co-nitrenoid (**8-N<sub>2</sub>**) at intermediate-spin Co(III) state. Broken-Symmetry calculation.

Sextet ( $S = 5/2$ )

(4, 1)

|    |          |           |          |
|----|----------|-----------|----------|
| Co | 6.220640 | 18.389496 | 8.064970 |
| N  | 5.204872 | 19.908176 | 7.176731 |
| N  | 5.659763 | 17.032271 | 6.673826 |
| C  | 6.178826 | 15.846276 | 6.317957 |
| N  | 5.081510 | 18.218291 | 9.400339 |
| C  | 4.010775 | 19.612547 | 6.510943 |
| C  | 8.502946 | 15.222392 | 5.690076 |
| C  | 7.516362 | 15.318997 | 6.708480 |
| C  | 4.455502 | 17.188725 | 5.978503 |
| C  | 5.207013 | 21.231162 | 7.443885 |

|   |           |           |           |
|---|-----------|-----------|-----------|
| C | 5.276098  | 22.079513 | 10.424436 |
| C | 7.979534  | 17.074966 | 4.047757  |
| C | 3.254638  | 20.814488 | 6.387117  |
| C | 7.473879  | 22.289045 | 7.258186  |
| C | 7.581402  | 21.955787 | 5.802795  |
| C | 4.228091  | 16.011921 | 5.194639  |
| C | 2.380117  | 18.288409 | 5.177299  |
| C | 6.354960  | 21.958570 | 8.066470  |
| C | 3.673687  | 18.355816 | 5.949703  |
| C | 3.942763  | 22.484696 | 10.231795 |
| C | 9.751798  | 14.658990 | 5.982426  |
| C | 7.823073  | 14.845440 | 8.006857  |
| C | 9.103877  | 14.317299 | 8.259804  |
| C | 7.475079  | 23.049912 | 9.939209  |
| C | 6.363075  | 22.354351 | 9.432096  |
| C | 2.301751  | 18.867755 | 3.887314  |
| C | 1.075117  | 18.831752 | 3.205490  |
| C | 5.310292  | 15.182582 | 5.395663  |
| C | 10.079411 | 14.206581 | 7.265632  |
| C | 8.277941  | 15.723856 | 4.299027  |
| C | 6.841932  | 14.815389 | 9.132745  |
| C | 8.560737  | 22.983363 | 7.814604  |
| C | 8.583815  | 23.376835 | 9.154722  |
| C | 1.249919  | 17.655969 | 5.750349  |
| C | 7.824545  | 17.539786 | 2.738092  |
| C | 0.042443  | 17.646144 | 5.035203  |
| C | 6.371309  | 15.134978 | 11.508901 |
| C | 4.010277  | 21.827200 | 6.955628  |
| C | 7.225633  | 15.264944 | 10.411057 |
| C | 5.613466  | 21.500496 | 11.666281 |
| C | 4.706985  | 14.115630 | 10.083294 |
| C | 5.561191  | 14.250501 | 8.985166  |
| C | 6.712573  | 22.510939 | 4.846926  |
| C | 5.110680  | 14.548737 | 11.351513 |
| C | 8.425233  | 14.856464 | 3.201607  |
| C | 8.655693  | 21.166372 | 5.352483  |
| C | 6.920472  | 22.293111 | 3.480600  |
| C | 3.894827  | 18.672693 | 9.991704  |
| C | 1.683389  | 18.246658 | 11.164830 |
| C | 4.662154  | 21.347021 | 12.678640 |
| C | 2.962002  | 17.604250 | 10.604050 |
| C | 1.312479  | 17.000065 | 7.111740  |
| C | 7.956487  | 16.663560 | 1.655578  |
| C | 2.987742  | 22.330397 | 11.242002 |
| C | 7.999817  | 21.515364 | 3.045622  |
| C | 3.342947  | 21.768613 | 12.472879 |

|   |           |           |           |
|---|-----------|-----------|-----------|
| C | 8.862500  | 20.945227 | 3.987806  |
| C | 3.508116  | 19.504155 | 3.228792  |
| C | 8.258501  | 15.318920 | 1.892090  |
| C | 0.639032  | 17.278330 | 11.759566 |
| C | 1.198894  | 16.441119 | 12.919810 |
| C | -0.611792 | 18.056144 | 12.203450 |
| H | 1.008621  | 19.285857 | 2.211865  |
| H | -0.835316 | 17.166367 | 5.480623  |
| H | 1.673485  | 17.704477 | 7.881465  |
| H | 0.316816  | 16.638603 | 7.421571  |
| H | 2.001726  | 16.137819 | 7.121925  |
| H | 4.349396  | 18.792351 | 3.150949  |
| H | 3.259254  | 19.852677 | 2.212272  |
| H | 3.882612  | 20.370161 | 3.800261  |
| H | 3.372562  | 15.843512 | 4.542074  |
| H | 5.508420  | 14.215906 | 4.934417  |
| H | 8.663725  | 13.802777 | 3.380973  |
| H | 8.369718  | 14.624173 | 1.053229  |
| H | 7.827528  | 17.031489 | 0.631898  |
| H | 7.602257  | 18.598210 | 2.568998  |
| H | 7.885213  | 17.770767 | 4.885840  |
| H | 10.496807 | 14.594023 | 5.182118  |
| H | 9.321512  | 13.939398 | 9.263131  |
| H | 5.241117  | 13.881307 | 8.007536  |
| H | 3.724986  | 13.650135 | 9.947700  |
| H | 4.447276  | 14.422728 | 12.213649 |
| H | 6.697429  | 15.495295 | 12.490475 |
| H | 8.205469  | 15.732366 | 10.540420 |
| H | 3.652532  | 22.959862 | 9.294736  |
| H | 1.962736  | 22.674167 | 11.068298 |
| H | 2.598543  | 21.665387 | 13.268732 |
| H | 4.957379  | 20.893889 | 13.630922 |
| H | 6.639719  | 21.161639 | 11.836356 |
| H | 5.882419  | 23.142596 | 5.174991  |
| H | 6.242366  | 22.748682 | 2.752018  |
| H | 8.172870  | 21.356258 | 1.975685  |
| H | 9.701011  | 20.322750 | 3.659541  |
| H | 9.325856  | 20.713000 | 6.087314  |
| H | 9.400153  | 23.243966 | 7.162188  |
| H | 7.452583  | 23.370960 | 10.984841 |
| H | 3.766651  | 22.889222 | 6.991112  |
| H | 2.285720  | 20.907714 | 5.898898  |
| H | 4.175193  | 19.414947 | 10.771791 |
| H | 3.347809  | 19.269022 | 9.223922  |
| H | 3.517507  | 17.069393 | 11.392628 |
| H | 2.713008  | 16.853955 | 9.833655  |



|    |           |           |           |
|----|-----------|-----------|-----------|
| H  | 1.961946  | 18.986999 | 11.940481 |
| H  | 1.196608  | 18.828877 | 10.356716 |
| H  | 0.333782  | 16.577887 | 10.956917 |
| H  | 2.016288  | 15.773605 | 12.593227 |
| H  | 1.595752  | 17.092330 | 13.722677 |
| H  | 0.412022  | 15.804897 | 13.366292 |
| H  | -1.056515 | 18.622607 | 11.364203 |
| H  | -1.388405 | 17.377855 | 12.602266 |
| H  | -0.362507 | 18.782013 | 13.000785 |
| Cl | 8.410579  | 18.562751 | 8.099914  |
| C  | 9.760860  | 24.118595 | 9.743527  |
| H  | 9.435719  | 24.853397 | 10.501391 |
| H  | 10.459263 | 23.419618 | 10.244465 |
| H  | 10.333185 | 24.656281 | 8.967489  |
| C  | 11.448805 | 13.630472 | 7.545986  |
| H  | 11.739526 | 12.891520 | 6.777661  |
| H  | 12.220657 | 14.423825 | 7.538196  |
| H  | 11.490324 | 13.131358 | 8.529711  |
| C  | -0.051427 | 18.237631 | 3.775434  |
| H  | -1.002919 | 18.231235 | 3.233493  |

## References.

- (1) King, E. R.; Hennessy, E. T.; Betley, T. A., Catalytic C–H bond amination from high-spin iron imido complexes. *J. Am. Chem. Soc.* **2011**, *133* (13), 4917-4923.
- (2) King, E. R.; Sazama, G. T.; Betley, T. A., Co(III) imidos exhibiting spin crossover and C–H bond activation. *J. Am. Chem. Soc.* **2012**, *134* (43), 17858-17861.
- (3) Baek, Y.; Betley, T. A., Catalytic C–H amination mediated by dipyrin cobalt imidos. *J. Am. Chem. Soc.* **2019**, *141* (19), 7797-7806.
- (4) Smith, P. A. S.; Hall, J. H., Kinetic evidence for the formation of azene (electron-deficient nitrogen) intermediates from aryl azides. *J. Am. Chem. Soc.* **1962**, *84* (3), 480-485.
- (5) Jin, L.-M.; Lu, H.; Cui, Y.; Lizardi, C. L.; Arzua, T. N.; Wojtas, L.; Cui, X.; Zhang, X. P., Selective radical amination of aldehydic C(sp<sup>2</sup>)–H bonds with fluoroaryl azides via Co(II)-based metalloradical catalysis: synthesis of *N*-fluoroaryl amides from aldehydes under neutral and nonoxidative conditions. *Chem. Sci.* **2014**, *5* (6), 2422-2427.
- (6) Hennessy, E. T.; Betley, T. A., Complex *N*-heterocycle synthesis via iron-catalyzed, direct C–H bond amination. *Science* **2013**, *340* (6132), 591-595.
- (7) Stoll, S.; Schweiger, A., EasySpin, a comprehensive software package for spectral simulation and analysis in EPR. *J. Magn. Reson.* **2006**, *178* (1), 42-55.
- (8) Johnson, E. R.; Keinan, S.; Mori-Sánchez, P.; Contreras-García, J.; Cohen, A. J.; Yang, W., Revealing noncovalent interactions. *J. Am. Chem. Soc.* **2010**, *132* (18), 6498-6506.
- (9) Contreras-García, J.; Johnson, E. R.; Keinan, S.; Chaudret, R.; Piquemal, J.-P.; Beratan, D. N.; Yang, W., NCIPLOT: A program for plotting noncovalent interaction regions. *J. Chem. Theory Comput.* **2011**, *7* (3), 625-632.
- (10) Intrieri, D.; Caselli, A.; Ragaini, F.; Macchi, P.; Casati, N.; Gallo, E., Insights into the mechanism of the ruthenium–porphyrin-catalysed allylic amination of olefins by aryl azides. *Eur. J. Inorg. Chem.* **2012**, 569-580.

- (11) Fantauzzi, S.; Gallo, E.; Caselli, A.; Piangiolo, C.; Ragaini, F.; Cenini, S., The (porphyrin)ruthenium-catalyzed aziridination of olefins using aryl azides as nitrogen sources. *Eur. J. Org. Chem.* **2007**, 6053-6059.
- (12) Yoshimoto, F. K.; Jung, I. J.; Goyal, S.; Gonzalez, E.; Guengerich, F. P., Isotope-labeling studies support the electrophilic compound I iron active species,  $\text{FeO}^{3+}$ , for the carbon-carbon bond cleavage reaction of the cholesterol side-chain cleavage enzyme, Cytochrome P450 11A1. *J. Am. Chem. Soc.* **2016**, *138* (37), 12124-12141.
- (13) Renny, J. S.; Tomasevich, L. L.; Tallmadge, E. H.; Collum, D. B., Method of continuous variations: applications of Job plots to the study of molecular associations in organometallic chemistry. *Angew. Chem. Int. Ed.* **2013**, *52* (46), 11998-12013.
- (14) Fielding, L., Determination of association constants ( $K_a$ ) from solution NMR data. *Tetrahedron* **2000**, *56* (34), 6151-6170.
- (15) APEX2 Software Suite; Bruker AXS: Madison, WI, 2014.
- (16) (a) Sheldrick, G. M., SHELXT - Integrated space-group and crystal-structure determination. *Acta Crystallogr., Sect. A* **2015**, *71* (1), 3-8. (b) Sheldrick, G. M., Crystal structure refinement with SHELXL. *Acta Crystallogr.*, **2015**, C71, 3-8.
- (17) Neese, F. ORCA - An ab initio, Density functional and semi-empirical electronic structure package; Version 3.0.3 ed. Universitat Bonn, Bonn, Germany, 2009.
- (18) Lee, C.; Yang, W.; Parr, R. G., Development of the Colle-Salvetti correlation-energy formula into a functional of the electron density. *Phys. Rev. B* **1988**, *37* (2), 785-789.
- (19) Becke, A. D., Density-functional thermochemistry. III. The role of exact exchange. *J. Chem. Phys.* **1993**, *98* (7), 5648-5652.
- (20) Weigend, F.; Ahlrichs, R., Balanced basis sets of split valence, triple zeta valence and quadruple zeta valence quality for H to Rn: Design and assessment of accuracy. *Phys. Chem. Chem. Phys.* **2005**, *7* (18), 3297-3305.
- (21) Schäfer, A.; Huber, C.; Ahlrichs, R., Fully optimized contracted Gaussian basis sets of triple zeta valence quality for atoms Li to Kr. *J. Chem. Phys.* **1994**, *100* (8), 5829-5835.

- (22) Schäfer, A.; Horn, H.; Ahlrichs, R., Fully optimized contracted Gaussian basis sets for atoms Li to Kr. *J. Chem. Phys.* **1992**, *97* (4), 2571-2577.
- (23) Weigend, F., Accurate coulomb-fitting basis sets for H to Rn. *Phys. Chem. Chem. Phys.* **2006**, *8* (9), 1057-1065.
- (24) Neese, F. ORCA - The ORCA program system, *Wiley Interdiscip. Rev.: Comput. Mol. Sci.*, **2012**, *2*, 73.
- (25) Kirchner, B.; Wennmohs, F.; Ye, S.; Neese, F., Theoretical bioinorganic chemistry: the electronic structure makes a difference. *Curr. Opin. Chem. Biol.* **2007**, *11* (2), 134-141.

# checkCIF/PLATON report

Structure factors have been supplied for datablock(s) 3\_ArLCoBrN3Ar

THIS REPORT IS FOR GUIDANCE ONLY. IF USED AS PART OF A REVIEW PROCEDURE FOR PUBLICATION, IT SHOULD NOT REPLACE THE EXPERTISE OF AN EXPERIENCED CRYSTALLOGRAPHIC REFEREE.

No syntax errors found.      CIF dictionary      Interpreting this report

## Datablock: 3\_ArLCoBrN3Ar

---

Bond precision:    C-C = 0.0081 A                      Wavelength=0.71073

Cell:                      a=11.5371(4)              b=22.8606(10)              c=27.3251(12)  
                            alpha=90                      beta=94.279(4)              gamma=90  
Temperature:              100 K

|                | Calculated                 | Reported           |
|----------------|----------------------------|--------------------|
| Volume         | 7186.8(5)                  | 7186.8(5)          |
| Space group    | P 21/n                     | P 21/n             |
| Hall group     | -P 2yn                     | -P 2yn             |
| Moiety formula | C76 H62 Br Co N5, 2(C7 H8) | C76H62BrCo,2(C7H8) |
| Sum formula    | C90 H78 Br Co N5           | C90 H78 Br Co N5   |
| Mr             | 1368.41                    | 1368.41            |
| Dx,g cm-3      | 1.265                      | 1.265              |
| Z              | 4                          | 4                  |
| Mu (mm-1)      | 0.846                      | 0.846              |
| F000           | 2860.0                     | 2860.0             |
| F000'          | 2861.10                    |                    |
| h,k,lmax       | 13,27,32                   | 13,27,32           |
| Nref           | 12707                      | 12706              |
| Tmin,Tmax      | 0.903,0.951                | 0.661,0.745        |
| Tmin'          | 0.844                      |                    |

Correction method= # Reported T Limits: Tmin=0.661 Tmax=0.745  
AbsCorr = MULTI-SCAN

Data completeness= 1.000                      Theta(max)= 25.027

R(reflections)= 0.0860( 7291)              wR2(reflections)= 0.1631( 12706)

S = 1.091                                      Npar= 1086

---

The following ALERTS were generated. Each ALERT has the format

**test-name\_ALERT\_alert-type\_alert-level.**

Click on the hyperlinks for more details of the test.

---

**Alert level B**

PLAT250\_ALERT\_2\_B Large U3/U1 Ratio for Average U(i,j) Tensor .... 4.3 Note

**Author Response: We cannot avoid this alert by using SIMU only to model the disorder in the structure. We have applied a stricter restraint by lowering down the parameter from SIMU 0.04 (default) to SIMU 0.02 or even to SIMU 0.01. As SIMU 0.01 assumes the default 1.4 distance criterion, it has been applied as a last-resort solution. We note that such Alert at B level can be avoided by applying EADP for the pair of disordered atoms and/or RIGU on the bonded atoms in disorder fragment.**

---

**Alert level C**

RINTA01\_ALERT\_3\_C The value of Rint is greater than 0.12

Rint given 0.166

PLAT020\_ALERT\_3\_C The Value of Rint is Greater Than 0.12 ..... 0.166 Report

PLAT220\_ALERT\_2\_C Non-Solvent Resd 1 C Ueq(max)/Ueq(min) Range 3.2 Ratio

PLAT250\_ALERT\_2\_C Large U3/U1 Ratio for Average U(i,j) Tensor .... 3.3 Note

**Author Response: We cannot avoid this alert by using SIMU only to model the disorder in the structure. We have applied a stricter restraint by lowering down the parameter from SIMU 0.04 (default) to SIMU 0.02 or even to SIMU 0.01. As SIMU 0.01 assumes the default 1.4 distance criterion, it has been applied as a last-resort solution. We note that such Alert at B level can be avoided by applying EADP for the pair of disordered atoms and/or RIGU on the bonded atoms in disorder fragment.**

PLAT250\_ALERT\_2\_C Large U3/U1 Ratio for Average U(i,j) Tensor .... 2.7 Note

**Author Response: We cannot avoid this alert by using SIMU only to model the disorder in the structure. We have applied a stricter restraint by lowering down the parameter from SIMU 0.04 (default) to SIMU 0.02 or even to SIMU 0.01. As SIMU 0.01 assumes the default 1.4 distance criterion, it has been applied as a last-resort solution. We note that such Alert at B level can be avoided by applying EADP for the pair of disordered atoms and/or RIGU on the bonded atoms in disorder fragment.**

PLAT250\_ALERT\_2\_C Large U3/U1 Ratio for Average U(i,j) Tensor .... 3.3 Note

**Author Response: We cannot avoid this alert by using SIMU only to model the disorder in the structure. We have applied a stricter restraint by lowering down the parameter from SIMU 0.04 (default) to SIMU 0.02 or even to SIMU 0.01. As SIMU 0.01 assumes the default 1.4 distance criterion, it has been applied as a last-resort solution. We note that such Alert at B level can be avoided by applying EADP for the pair of disordered atoms and/or RIGU on the bonded atoms in disorder fragment.**

|                   |                                                 |              |
|-------------------|-------------------------------------------------|--------------|
| PLAT341_ALERT_3_C | Low Bond Precision on C-C Bonds .....           | 0.0081 Ang.  |
| PLAT906_ALERT_3_C | Large K Value in the Analysis of Variance ..... | 15.633 Check |
| PLAT906_ALERT_3_C | Large K Value in the Analysis of Variance ..... | 3.595 Check  |

### ● Alert level G

|                   |                                                                                                                                                                                                                                                                                                               |              |
|-------------------|---------------------------------------------------------------------------------------------------------------------------------------------------------------------------------------------------------------------------------------------------------------------------------------------------------------|--------------|
| FORMU01_ALERT_1_G | There is a discrepancy between the atom counts in the<br>_chemical_formula_sum and _chemical_formula_moiety. This is<br>usually due to the moiety formula being in the wrong format.<br>Atom count from _chemical_formula_sum: C90 H78 Br1 Co1 N5<br>Atom count from _chemical_formula_moiety:C90 H78 Br1 Co1 |              |
| PLAT002_ALERT_2_G | Number of Distance or Angle Restraints on AtSite                                                                                                                                                                                                                                                              | 23 Note      |
| PLAT003_ALERT_2_G | Number of Uiso or Uij Restrained non-H Atoms ...                                                                                                                                                                                                                                                              | 71 Report    |
| PLAT042_ALERT_1_G | Calc. and Reported MoietyFormula Strings Differ                                                                                                                                                                                                                                                               | Please Check |
| PLAT083_ALERT_2_G | SHELXL Second Parameter in WGHT Unusually Large                                                                                                                                                                                                                                                               | 18.70 Why ?  |
| PLAT171_ALERT_4_G | The CIF-Embedded .res File Contains EADP Records                                                                                                                                                                                                                                                              | 1 Report     |
| PLAT175_ALERT_4_G | The CIF-Embedded .res File Contains SAME Records                                                                                                                                                                                                                                                              | 1 Report     |
| PLAT176_ALERT_4_G | The CIF-Embedded .res File Contains SADI Records                                                                                                                                                                                                                                                              | 4 Report     |
| PLAT178_ALERT_4_G | The CIF-Embedded .res File Contains SIMU Records                                                                                                                                                                                                                                                              | 6 Report     |
| PLAT300_ALERT_4_G | Atom Site Occupancy of C11S Constrained at                                                                                                                                                                                                                                                                    | 0.5 Check    |
| PLAT300_ALERT_4_G | Atom Site Occupancy of C12S Constrained at                                                                                                                                                                                                                                                                    | 0.5 Check    |
| PLAT300_ALERT_4_G | Atom Site Occupancy of C13S Constrained at                                                                                                                                                                                                                                                                    | 0.5 Check    |
| PLAT300_ALERT_4_G | Atom Site Occupancy of C14S Constrained at                                                                                                                                                                                                                                                                    | 0.5 Check    |
| PLAT300_ALERT_4_G | Atom Site Occupancy of C15S Constrained at                                                                                                                                                                                                                                                                    | 0.5 Check    |
| PLAT300_ALERT_4_G | Atom Site Occupancy of C16S Constrained at                                                                                                                                                                                                                                                                    | 0.5 Check    |
| PLAT300_ALERT_4_G | Atom Site Occupancy of C17S Constrained at                                                                                                                                                                                                                                                                    | 0.5 Check    |
| PLAT300_ALERT_4_G | Atom Site Occupancy of H11S Constrained at                                                                                                                                                                                                                                                                    | 0.5 Check    |
| PLAT300_ALERT_4_G | Atom Site Occupancy of H12S Constrained at                                                                                                                                                                                                                                                                    | 0.5 Check    |
| PLAT300_ALERT_4_G | Atom Site Occupancy of H13S Constrained at                                                                                                                                                                                                                                                                    | 0.5 Check    |
| PLAT300_ALERT_4_G | Atom Site Occupancy of H14S Constrained at                                                                                                                                                                                                                                                                    | 0.5 Check    |
| PLAT300_ALERT_4_G | Atom Site Occupancy of H15S Constrained at                                                                                                                                                                                                                                                                    | 0.5 Check    |
| PLAT300_ALERT_4_G | Atom Site Occupancy of H17A Constrained at                                                                                                                                                                                                                                                                    | 0.5 Check    |
| PLAT300_ALERT_4_G | Atom Site Occupancy of H17B Constrained at                                                                                                                                                                                                                                                                    | 0.5 Check    |
| PLAT300_ALERT_4_G | Atom Site Occupancy of H17C Constrained at                                                                                                                                                                                                                                                                    | 0.5 Check    |
| PLAT300_ALERT_4_G | Atom Site Occupancy of C21S Constrained at                                                                                                                                                                                                                                                                    | 0.5 Check    |
| PLAT300_ALERT_4_G | Atom Site Occupancy of C22S Constrained at                                                                                                                                                                                                                                                                    | 0.5 Check    |
| PLAT300_ALERT_4_G | Atom Site Occupancy of C23S Constrained at                                                                                                                                                                                                                                                                    | 0.5 Check    |
| PLAT300_ALERT_4_G | Atom Site Occupancy of C24S Constrained at                                                                                                                                                                                                                                                                    | 0.5 Check    |
| PLAT300_ALERT_4_G | Atom Site Occupancy of C25S Constrained at                                                                                                                                                                                                                                                                    | 0.5 Check    |
| PLAT300_ALERT_4_G | Atom Site Occupancy of C26S Constrained at                                                                                                                                                                                                                                                                    | 0.5 Check    |
| PLAT300_ALERT_4_G | Atom Site Occupancy of C27S Constrained at                                                                                                                                                                                                                                                                    | 0.5 Check    |
| PLAT300_ALERT_4_G | Atom Site Occupancy of H21S Constrained at                                                                                                                                                                                                                                                                    | 0.5 Check    |
| PLAT300_ALERT_4_G | Atom Site Occupancy of H22S Constrained at                                                                                                                                                                                                                                                                    | 0.5 Check    |
| PLAT300_ALERT_4_G | Atom Site Occupancy of H23S Constrained at                                                                                                                                                                                                                                                                    | 0.5 Check    |
| PLAT300_ALERT_4_G | Atom Site Occupancy of H24S Constrained at                                                                                                                                                                                                                                                                    | 0.5 Check    |
| PLAT300_ALERT_4_G | Atom Site Occupancy of H25S Constrained at                                                                                                                                                                                                                                                                    | 0.5 Check    |
| PLAT300_ALERT_4_G | Atom Site Occupancy of H27A Constrained at                                                                                                                                                                                                                                                                    | 0.5 Check    |
| PLAT300_ALERT_4_G | Atom Site Occupancy of H27B Constrained at                                                                                                                                                                                                                                                                    | 0.5 Check    |
| PLAT300_ALERT_4_G | Atom Site Occupancy of H27C Constrained at                                                                                                                                                                                                                                                                    | 0.5 Check    |
| PLAT301_ALERT_3_G | Main Residue Disorder .....(Resd 1 )                                                                                                                                                                                                                                                                          | 27% Note     |
| PLAT302_ALERT_4_G | Anion/Solvent/Minor-Residue Disorder (Resd 2 )                                                                                                                                                                                                                                                                | 100% Note    |

|                   |                                                  |         |       |           |
|-------------------|--------------------------------------------------|---------|-------|-----------|
| PLAT302_ALERT_4_G | Anion/Solvent/Minor-Residue Disorder (Resd 3 )   |         | 100%  | Note      |
| PLAT302_ALERT_4_G | Anion/Solvent/Minor-Residue Disorder (Resd 4 )   |         | 100%  | Note      |
| PLAT302_ALERT_4_G | Anion/Solvent/Minor-Residue Disorder (Resd 5 )   |         | 100%  | Note      |
| PLAT304_ALERT_4_G | Non-Integer Number of Atoms in .....             | Resd 2  | 11.62 | Check     |
| PLAT304_ALERT_4_G | Non-Integer Number of Atoms in .....             | Resd 3  | 7.50  | Check     |
| PLAT304_ALERT_4_G | Non-Integer Number of Atoms in .....             | Resd 4  | 7.50  | Check     |
| PLAT304_ALERT_4_G | Non-Integer Number of Atoms in .....             | Resd 5  | 3.37  | Check     |
| PLAT410_ALERT_2_G | Short Intra H...H Contact H17                    | ..H38A  | .     | 2.04 Ang. |
|                   |                                                  | x,y,z = | 1_555 | Check     |
| PLAT410_ALERT_2_G | Short Intra H...H Contact H17                    | ..H38   | .     | 1.98 Ang. |
|                   |                                                  | x,y,z = | 1_555 | Check     |
| PLAT410_ALERT_2_G | Short Intra H...H Contact H19                    | ..H34A  | .     | 2.09 Ang. |
|                   |                                                  | x,y,z = | 1_555 | Check     |
| PLAT410_ALERT_2_G | Short Intra H...H Contact H19                    | ..H34   | .     | 2.02 Ang. |
|                   |                                                  | x,y,z = | 1_555 | Check     |
| PLAT412_ALERT_2_G | Short Intra XH3 .. XHn H69                       | ..H74F  | .     | 1.92 Ang. |
|                   |                                                  | x,y,z = | 1_555 | Check     |
| PLAT720_ALERT_4_G | Number of Unusual/Non-Standard Labels .....      |         |       | 6 Note    |
| PLAT789_ALERT_4_G | Atoms with Negative _atom_site_disorder_group #  |         |       | 30 Check  |
| PLAT811_ALERT_5_G | No ADDSYM Analysis: Too Many Excluded Atoms .... |         |       | ! Info    |
| PLAT860_ALERT_3_G | Number of Least-Squares Restraints .....         |         |       | 933 Note  |
| PLAT910_ALERT_3_G | Missing # of FCF Reflection(s) Below Theta(Min). |         |       | 2 Note    |
| PLAT978_ALERT_2_G | Number C-C Bonds with Positive Residual Density. |         |       | 3 Info    |

---

0 **ALERT level A** = Most likely a serious problem - resolve or explain  
1 **ALERT level B** = A potentially serious problem, consider carefully  
9 **ALERT level C** = Check. Ensure it is not caused by an omission or oversight  
59 **ALERT level G** = General information/check it is not something unexpected

2 **ALERT type 1** CIF construction/syntax error, inconsistent or missing data  
14 **ALERT type 2** Indicator that the structure model may be wrong or deficient  
8 **ALERT type 3** Indicator that the structure quality may be low  
44 **ALERT type 4** Improvement, methodology, query or suggestion  
1 **ALERT type 5** Informative message, check

---



It is advisable to attempt to resolve as many as possible of the alerts in all categories. Often the minor alerts point to easily fixed oversights, errors and omissions in your CIF or refinement strategy, so attention to these fine details can be worthwhile. In order to resolve some of the more serious problems it may be necessary to carry out additional measurements or structure refinements. However, the purpose of your study may justify the reported deviations and the more serious of these should normally be commented upon in the discussion or experimental section of a paper or in the "special\_details" fields of the CIF. checkCIF was carefully designed to identify outliers and unusual parameters, but every test has its limitations and alerts that are not important in a particular case may appear. Conversely, the absence of alerts does not guarantee there are no aspects of the results needing attention. It is up to the individual to critically assess their own results and, if necessary, seek expert advice.

### **Publication of your CIF in IUCr journals**

A basic structural check has been run on your CIF. These basic checks will be run on all CIFs submitted for publication in IUCr journals (*Acta Crystallographica*, *Journal of Applied Crystallography*, *Journal of Synchrotron Radiation*); however, if you intend to submit to *Acta Crystallographica Section C* or *E* or *IUCrData*, you should make sure that full publication checks are run on the final version of your CIF prior to submission.

### **Publication of your CIF in other journals**

Please refer to the *Notes for Authors* of the relevant journal for any special instructions relating to CIF submission.

---

**PLATON version of 07/08/2019; check.def file version of 30/07/2019**

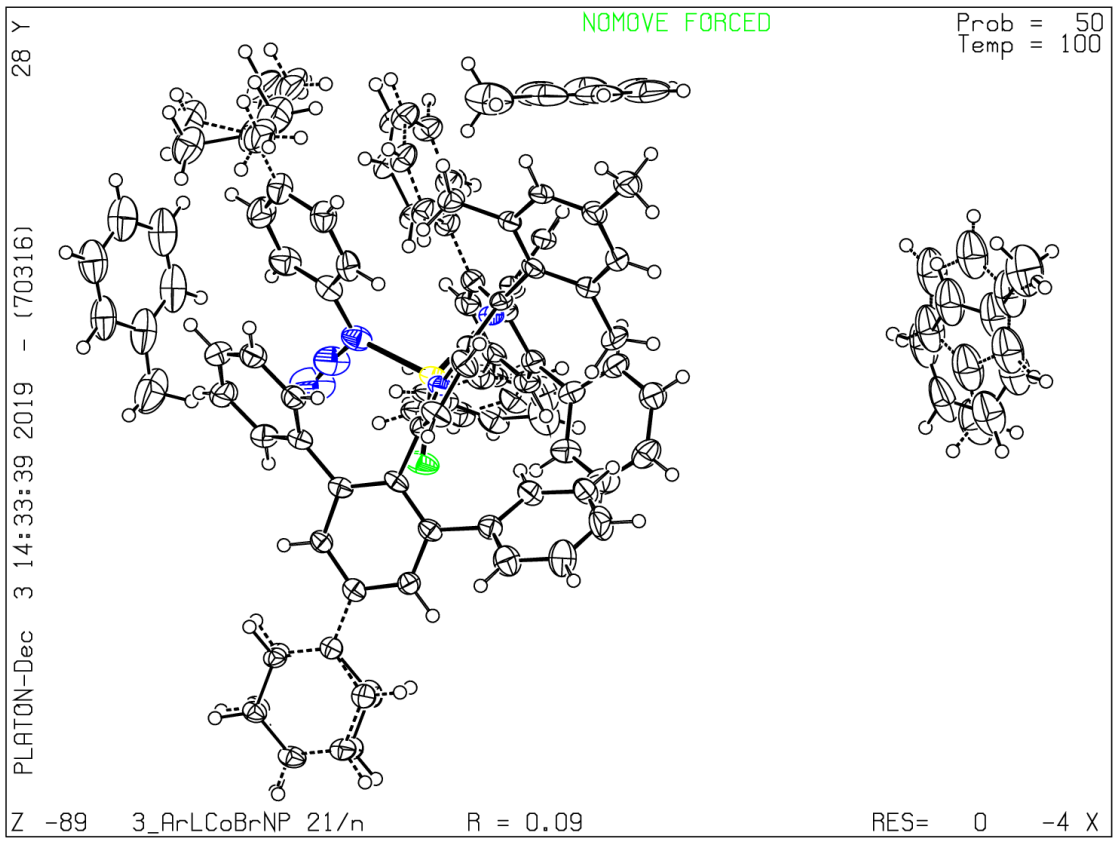

# checkCIF/PLATON report

Structure factors have been supplied for datablock(s) 4\_ArLCoBrannulation

THIS REPORT IS FOR GUIDANCE ONLY. IF USED AS PART OF A REVIEW PROCEDURE FOR PUBLICATION, IT SHOULD NOT REPLACE THE EXPERTISE OF AN EXPERIENCED CRYSTALLOGRAPHIC REFEREE.

No syntax errors found.      CIF dictionary      Interpreting this report

## Datablock: 4\_ArLCoBrannulation

---

Bond precision:    C-C = 0.0056 A

Wavelength=0.71073

Cell:                a=12.5766(4)                b=13.7287(5)                c=22.5774(8)  
                      alpha=100.712(1)            beta=94.999(1)            gamma=93.362(1)  
Temperature:        100 K

|                | Calculated                   | Reported               |
|----------------|------------------------------|------------------------|
| Volume         | 3804.6(2)                    | 3804.6(2)              |
| Space group    | P -1                         | P -1                   |
| Hall group     | -P 1                         | -P 1                   |
| Moiety formula | C76 H62 Br Co N3, 3.5(C6 H6) | C76H62BrCoN3,3.5(C6H6) |
| Sum formula    | C97 H83 Br Co N3             | C97 H83 Br Co N3       |
| Mr             | 1429.50                      | 1429.50                |
| Dx,g cm-3      | 1.248                        | 1.248                  |
| Z              | 2                            | 2                      |
| Mu (mm-1)      | 0.801                        | 0.801                  |
| F000           | 1496.0                       | 1496.0                 |
| F000'          | 1496.58                      |                        |
| h,k,lmax       | 15,16,26                     | 14,16,26               |
| Nref           | 13508                        | 13453                  |
| Tmin,Tmax      | 0.825,0.938                  | 0.698,0.745            |
| Tmin'          | 0.756                        |                        |

Correction method= # Reported T Limits: Tmin=0.698 Tmax=0.745  
AbsCorr = MULTI-SCAN

Data completeness= 0.996

Theta(max)= 25.085

R(reflections)= 0.0546( 8478)

wR2(reflections)= 0.1204( 13453)

S = 1.012

Npar= 1037

---

The following ALERTS were generated. Each ALERT has the format

**test-name\_ALERT\_alert-type\_alert-level.**

Click on the hyperlinks for more details of the test.

---

● **Alert level C**

|                   |                                                  |       |              |
|-------------------|--------------------------------------------------|-------|--------------|
| PLAT220_ALERT_2_C | Non-Solvent Resd 1 C Ueq(max)/Ueq(min) Range     | 3.5   | Ratio        |
| PLAT222_ALERT_3_C | Non-Solv. Resd 1 H Uiso(max)/Uiso(min) Range     | 4.2   | Ratio        |
| PLAT250_ALERT_2_C | Large U3/U1 Ratio for Average U(i,j) Tensor ...  | 2.8   | Note         |
| PLAT250_ALERT_2_C | Large U3/U1 Ratio for Average U(i,j) Tensor ...  | 2.1   | Note         |
| PLAT420_ALERT_2_C | D-H Without Acceptor N3 --H3 .                   |       | Please Check |
| PLAT906_ALERT_3_C | Large K Value in the Analysis of Variance .....  | 3.679 | Check        |
| PLAT910_ALERT_3_C | Missing # of FCF Reflection(s) Below Theta(Min). | 10    | Note         |
| PLAT911_ALERT_3_C | Missing FCF Refl Between Thmin & STh/L= 0.597    | 45    | Report       |

---

● **Alert level G**

|                   |                                                  |       |              |
|-------------------|--------------------------------------------------|-------|--------------|
| PLAT002_ALERT_2_G | Number of Distance or Angle Restraints on AtSite | 3     | Note         |
| PLAT003_ALERT_2_G | Number of Uiso or Uij Restrained non-H Atoms ... | 36    | Report       |
| PLAT042_ALERT_1_G | Calc. and Reported MoietyFormula Strings Differ  |       | Please Check |
| PLAT154_ALERT_1_G | The s.u.'s on the Cell Angles are Equal ..(Note) | 0.001 | Degree       |
| PLAT176_ALERT_4_G | The CIF-Embedded .res File Contains SADI Records | 1     | Report       |
| PLAT178_ALERT_4_G | The CIF-Embedded .res File Contains SIMU Records | 3     | Report       |
| PLAT301_ALERT_3_G | Main Residue Disorder .....                      | 7%    | Note         |
| PLAT302_ALERT_4_G | Anion/Solvent/Minor-Residue Disorder (Resd 4 )   | 100%  | Note         |
| PLAT302_ALERT_4_G | Anion/Solvent/Minor-Residue Disorder (Resd 5 )   | 100%  | Note         |
| PLAT302_ALERT_4_G | Anion/Solvent/Minor-Residue Disorder (Resd 6 )   | 100%  | Note         |
| PLAT302_ALERT_4_G | Anion/Solvent/Minor-Residue Disorder (Resd 7 )   | 100%  | Note         |
| PLAT304_ALERT_4_G | Non-Integer Number of Atoms in .....             | 7.69  | Check        |
| PLAT304_ALERT_4_G | Non-Integer Number of Atoms in .....             | 4.31  | Check        |
| PLAT304_ALERT_4_G | Non-Integer Number of Atoms in .....             | 3.01  | Check        |
| PLAT304_ALERT_4_G | Non-Integer Number of Atoms in .....             | 2.99  | Check        |
| PLAT432_ALERT_2_G | Short Inter X...Y Contact C54 ..C22T             | 3.15  | Ang.         |
|                   | 2-x,1-y,1-z =                                    | 2_766 | Check        |
| PLAT789_ALERT_4_G | Atoms with Negative _atom_site_disorder_group #  | 24    | Check        |
| PLAT793_ALERT_4_G | Model has Chirality at N3 (Centro SPGR)          | S     | Verify       |
| PLAT793_ALERT_4_G | Model has Chirality at C47 (Centro SPGR)         | S     | Verify       |
| PLAT793_ALERT_4_G | Model has Chirality at C48 (Centro SPGR)         | S     | Verify       |
| PLAT860_ALERT_3_G | Number of Least-Squares Restraints .....         | 481   | Note         |
| PLAT933_ALERT_2_G | Number of OMIT Records in Embedded .res File ... | 3     | Note         |
| PLAT978_ALERT_2_G | Number C-C Bonds with Positive Residual Density. | 1     | Info         |

---

0 **ALERT level A** = Most likely a serious problem - resolve or explain  
0 **ALERT level B** = A potentially serious problem, consider carefully  
8 **ALERT level C** = Check. Ensure it is not caused by an omission or oversight  
23 **ALERT level G** = General information/check it is not something unexpected

2 **ALERT type 1** CIF construction/syntax error, inconsistent or missing data  
9 **ALERT type 2** Indicator that the structure model may be wrong or deficient  
6 **ALERT type 3** Indicator that the structure quality may be low  
14 **ALERT type 4** Improvement, methodology, query or suggestion  
0 **ALERT type 5** Informative message, check

---

---

It is advisable to attempt to resolve as many as possible of the alerts in all categories. Often the minor alerts point to easily fixed oversights, errors and omissions in your CIF or refinement strategy, so attention to these fine details can be worthwhile. In order to resolve some of the more serious problems it may be necessary to carry out additional measurements or structure refinements. However, the purpose of your study may justify the reported deviations and the more serious of these should normally be commented upon in the discussion or experimental section of a paper or in the "special\_details" fields of the CIF. checkCIF was carefully designed to identify outliers and unusual parameters, but every test has its limitations and alerts that are not important in a particular case may appear. Conversely, the absence of alerts does not guarantee there are no aspects of the results needing attention. It is up to the individual to critically assess their own results and, if necessary, seek expert advice.

### **Publication of your CIF in IUCr journals**

A basic structural check has been run on your CIF. These basic checks will be run on all CIFs submitted for publication in IUCr journals (*Acta Crystallographica*, *Journal of Applied Crystallography*, *Journal of Synchrotron Radiation*); however, if you intend to submit to *Acta Crystallographica Section C* or *E* or *IUCrData*, you should make sure that full publication checks are run on the final version of your CIF prior to submission.

### **Publication of your CIF in other journals**

Please refer to the *Notes for Authors* of the relevant journal for any special instructions relating to CIF submission.

---

**PLATON version of 07/08/2019; check.def file version of 30/07/2019**

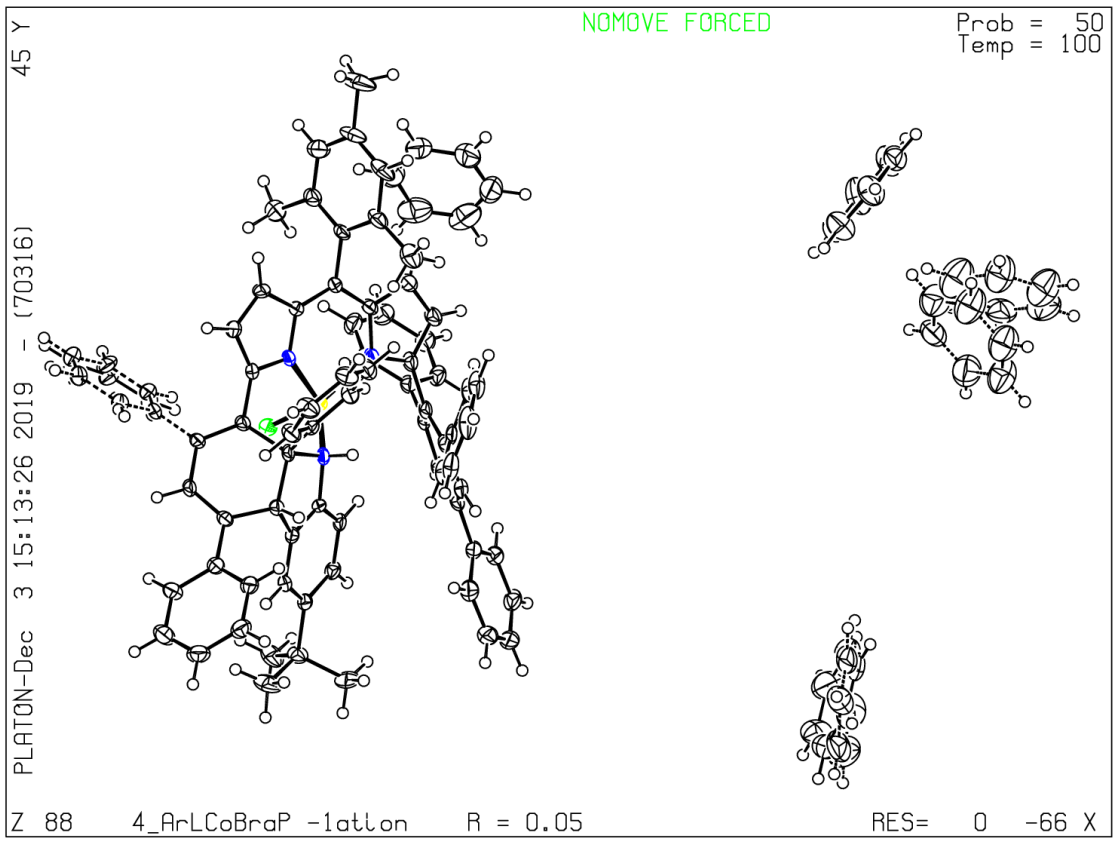

# checkCIF/PLATON report

Structure factors have been supplied for datablock(s) 5\_ArLCoBrNH2Ar

THIS REPORT IS FOR GUIDANCE ONLY. IF USED AS PART OF A REVIEW PROCEDURE FOR PUBLICATION, IT SHOULD NOT REPLACE THE EXPERTISE OF AN EXPERIENCED CRYSTALLOGRAPHIC REFEREE.

No syntax errors found.      CIF dictionary      Interpreting this report

## Datablock: 5\_ArLCoBrNH2Ar

---

|                 |                            |                      |             |
|-----------------|----------------------------|----------------------|-------------|
| Bond precision: | C-C = 0.0047 A             | Wavelength=0.71073   |             |
| Cell:           | a=17.7144(19)              | b=21.629(2)          | c=18.715(2) |
|                 | alpha=90                   | beta=108.264(2)      | gamma=90    |
| Temperature:    | 100 K                      |                      |             |
|                 | Calculated                 | Reported             |             |
| Volume          | 6809.3(12)                 | 6809.3(13)           |             |
| Space group     | P 21/c                     | P 21/c               |             |
| Hall group      | -P 2ybc                    | -P 2ybc              |             |
| Moiety formula  | C76 H64 Br Co N3, 2(C6 H6) | C76H64BrCoN3,2(C6H6) |             |
| Sum formula     | C88 H76 Br Co N3           | C88 H76 Br Co N3     |             |
| Mr              | 1314.35                    | 1314.35              |             |
| Dx,g cm-3       | 1.282                      | 1.282                |             |
| Z               | 4                          | 4                    |             |
| Mu (mm-1)       | 0.889                      | 0.889                |             |
| F000            | 2748.0                     | 2748.0               |             |
| F000'           | 2749.08                    |                      |             |
| h,k,lmax        | 21,25,22                   | 21,25,22             |             |
| Nref            | 12056                      | 12048                |             |
| Tmin,Tmax       | 0.808,0.915                | 0.692,0.745          |             |
| Tmin'           | 0.733                      |                      |             |

Correction method= # Reported T Limits: Tmin=0.692 Tmax=0.745  
AbsCorr = MULTI-SCAN

Data completeness= 0.999      Theta(max)= 25.043

R(reflections)= 0.0445( 8963)      wR2(reflections)= 0.1146( 12048)

S = 1.023      Npar= 883

---

The following ALERTS were generated. Each ALERT has the format

**test-name\_ALERT\_alert-type\_alert-level.**

Click on the hyperlinks for more details of the test.

---

● **Alert level C**

CRYSC01\_ALERT\_1\_C The word below has not been recognised as a standard identifier.  
maroon  
CRYSC01\_ALERT\_1\_C No recognised colour has been given for crystal colour.  
PLAT094\_ALERT\_2\_C Ratio of Maximum / Minimum Residual Density ... 3.69 Report  
PLAT220\_ALERT\_2\_C Non-Solvent Resd 1 C Ueq(max)/Ueq(min) Range 3.5 Ratio  
PLAT250\_ALERT\_2\_C Large U3/U1 Ratio for Average U(i,j) Tensor ... 2.9 Note  
PLAT250\_ALERT\_2\_C Large U3/U1 Ratio for Average U(i,j) Tensor ... 2.6 Note  
PLAT331\_ALERT\_2\_C Small Aver Phenyl C-C Dist C1S -C6S . 1.36 Ang.  
PLAT420\_ALERT\_2\_C D-H Without Acceptor N3 --H3A . Please Check  
PLAT420\_ALERT\_2\_C D-H Without Acceptor N3 --H3B . Please Check  
PLAT905\_ALERT\_3\_C Negative K value in the Analysis of Variance ... -0.066 Report  
PLAT911\_ALERT\_3\_C Missing FCF Refl Between Thmin & STh/L= 0.596 7 Report

---

● **Alert level G**

PLAT003\_ALERT\_2\_G Number of Uiso or Uij Restrained non-H Atoms ... 12 Report  
PLAT042\_ALERT\_1\_G Calc. and Reported MoietyFormula Strings Differ Please Check  
PLAT083\_ALERT\_2\_G SHELXL Second Parameter in WGHT Unusually Large 7.21 Why ?  
PLAT178\_ALERT\_4\_G The CIF-Embedded .res File Contains SIMU Records 1 Report  
PLAT302\_ALERT\_4\_G Anion/Solvent/Minor-Residue Disorder (Resd 3 ) 100% Note  
PLAT302\_ALERT\_4\_G Anion/Solvent/Minor-Residue Disorder (Resd 4 ) 100% Note  
PLAT304\_ALERT\_4\_G Non-Integer Number of Atoms in ..... Resd 3 8.35 Check  
PLAT304\_ALERT\_4\_G Non-Integer Number of Atoms in ..... Resd 4 3.65 Check  
PLAT860\_ALERT\_3\_G Number of Least-Squares Restraints ..... 192 Note  
PLAT909\_ALERT\_3\_G Percentage of I>2sig(I) Data at Theta(Max) Still 51% Note  
PLAT910\_ALERT\_3\_G Missing # of FCF Reflection(s) Below Theta(Min). 1 Note  
PLAT978\_ALERT\_2\_G Number C-C Bonds with Positive Residual Density. 4 Info

---

- 0 **ALERT level A** = Most likely a serious problem - resolve or explain  
0 **ALERT level B** = A potentially serious problem, consider carefully  
11 **ALERT level C** = Check. Ensure it is not caused by an omission or oversight  
12 **ALERT level G** = General information/check it is not something unexpected
- 3 ALERT type 1 CIF construction/syntax error, inconsistent or missing data  
10 ALERT type 2 Indicator that the structure model may be wrong or deficient  
5 ALERT type 3 Indicator that the structure quality may be low  
5 ALERT type 4 Improvement, methodology, query or suggestion  
0 ALERT type 5 Informative message, check
- 
-



It is advisable to attempt to resolve as many as possible of the alerts in all categories. Often the minor alerts point to easily fixed oversights, errors and omissions in your CIF or refinement strategy, so attention to these fine details can be worthwhile. In order to resolve some of the more serious problems it may be necessary to carry out additional measurements or structure refinements. However, the purpose of your study may justify the reported deviations and the more serious of these should normally be commented upon in the discussion or experimental section of a paper or in the "special\_details" fields of the CIF. checkCIF was carefully designed to identify outliers and unusual parameters, but every test has its limitations and alerts that are not important in a particular case may appear. Conversely, the absence of alerts does not guarantee there are no aspects of the results needing attention. It is up to the individual to critically assess their own results and, if necessary, seek expert advice.

### **Publication of your CIF in IUCr journals**

A basic structural check has been run on your CIF. These basic checks will be run on all CIFs submitted for publication in IUCr journals (*Acta Crystallographica*, *Journal of Applied Crystallography*, *Journal of Synchrotron Radiation*); however, if you intend to submit to *Acta Crystallographica Section C* or *E* or *IUCrData*, you should make sure that full publication checks are run on the final version of your CIF prior to submission.

### **Publication of your CIF in other journals**

Please refer to the *Notes for Authors* of the relevant journal for any special instructions relating to CIF submission.

---

**PLATON version of 07/08/2019; check.def file version of 30/07/2019**

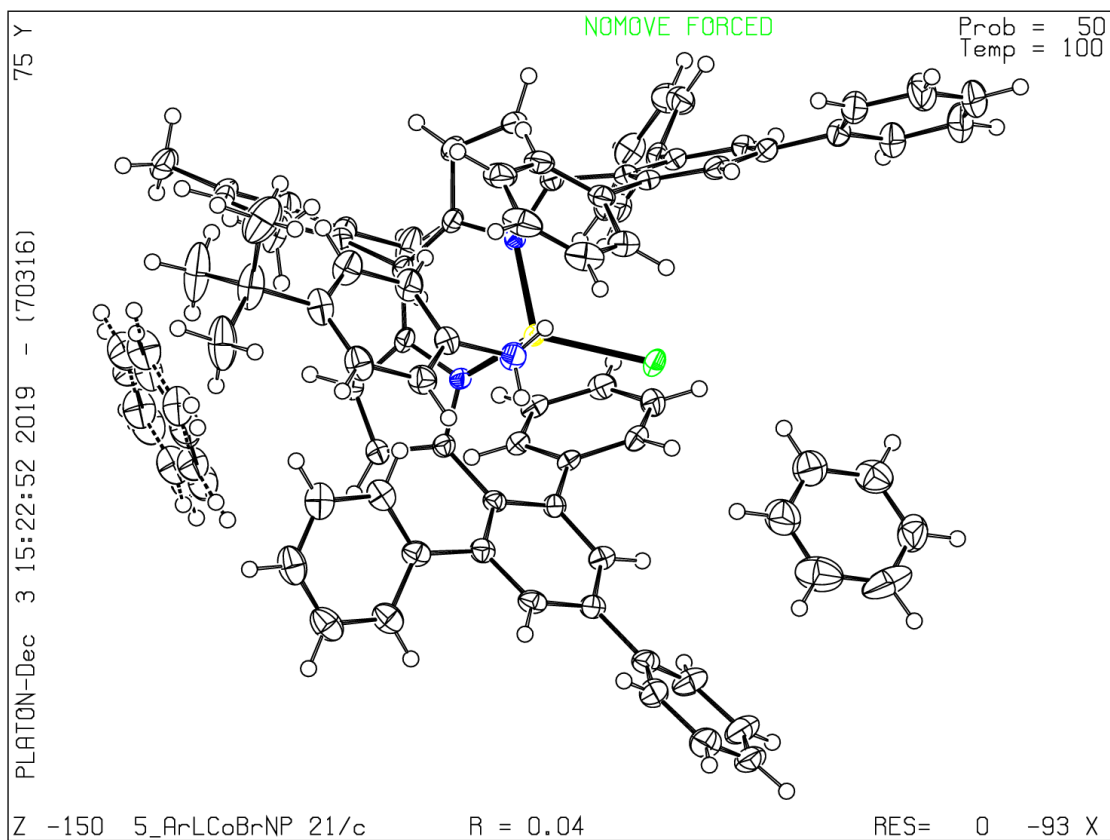

# checkCIF/PLATON report

Structure factors have been supplied for datablock(s) 7\_ArLCoBrN3R\_1

THIS REPORT IS FOR GUIDANCE ONLY. IF USED AS PART OF A REVIEW PROCEDURE FOR PUBLICATION, IT SHOULD NOT REPLACE THE EXPERTISE OF AN EXPERIENCED CRYSTALLOGRAPHIC REFEREE.

No syntax errors found.      CIF dictionary      Interpreting this report

## Datablock: 7\_ArLCoBrN3R\_1

---

Bond precision:    C-C = 0.0053 Å                      Wavelength=0.71073

Cell:              a=11.8481(4)              b=12.2353(3)              c=22.6467(7)  
                    alpha=95.171(2)          beta=101.347(3)          gamma=107.834(3)  
Temperature:      100 K

|                | Calculated       | Reported         |
|----------------|------------------|------------------|
| Volume         | 3024.10(17)      | 3024.11(17)      |
| Space group    | P -1             | P -1             |
| Hall group     | -P 1             | -P 1             |
| Moiety formula | C76 H62 Br Co N5 | C76H62BrCoN5     |
| Sum formula    | C76 H62 Br Co N5 | C76 H62 Br Co N5 |
| Mr             | 1184.14          | 1184.14          |
| Dx,g cm-3      | 1.300            | 1.300            |
| Z              | 2                | 2                |
| Mu (mm-1)      | 0.993            | 0.993            |
| F000           | 1230.0           | 1230.0           |
| F000'          | 1230.48          |                  |
| h,k,lmax       | 14,14,26         | 14,14,26         |
| Nref           | 10711            | 10693            |
| Tmin,Tmax      | 0.788,0.952      | 0.704,0.745      |
| Tmin'          | 0.706            |                  |

Correction method= # Reported T Limits: Tmin=0.704 Tmax=0.745  
AbsCorr = MULTI-SCAN

Data completeness= 0.998                      Theta(max)= 25.058

R(reflections)= 0.0495( 7395)              wR2(reflections)= 0.1045( 10693)

S = 1.011                                      Npar= 751

---

The following ALERTS were generated. Each ALERT has the format

**test-name\_ALERT\_alert-type\_alert-level.**

Click on the hyperlinks for more details of the test.

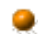

### Alert level B

PLAT910\_ALERT\_3\_B Missing # of FCF Reflection(s) Below Theta(Min).

13 Note

### Author Response: Reflections were blocked by the beamstop

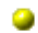

### Alert level C

|                   |                                           |                         |       |        |
|-------------------|-------------------------------------------|-------------------------|-------|--------|
| PLAT220_ALERT_2_C | Non-Solvent Resd 1 C                      | Ueq(max)/Ueq(min) Range | 3.3   | Ratio  |
| PLAT230_ALERT_2_C | Hirshfeld Test Diff for N3                | --N4                    | 6.3   | s.u.   |
| PLAT906_ALERT_3_C | Large K Value in the Analysis of Variance | .....                   | 2.648 | Check  |
| PLAT911_ALERT_3_C | Missing FCF Refl Between Thmin & STh/L=   | 0.596                   | 6     | Report |

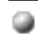

### Alert level G

|                   |                                                  |        |           |
|-------------------|--------------------------------------------------|--------|-----------|
| PLAT042_ALERT_1_G | Calc. and Reported MoietyFormula Strings Differ  | Please | Check     |
| PLAT232_ALERT_2_G | Hirshfeld Test Diff (M-X) Br1                    | --Col  | 10.0 s.u. |
| PLAT380_ALERT_4_G | Incorrectly? Oriented X(sp2)-Methyl Moiety       | .....  | C9 Check  |
| PLAT909_ALERT_3_G | Percentage of I>2sig(I) Data at Theta(Max) Still | 42%    | Note      |
| PLAT933_ALERT_2_G | Number of OMIT Records in Embedded .res File     | ...    | 6 Note    |
| PLAT978_ALERT_2_G | Number C-C Bonds with Positive Residual Density. |        | 1 Info    |

- 
- 0 **ALERT level A** = Most likely a serious problem - resolve or explain  
1 **ALERT level B** = A potentially serious problem, consider carefully  
4 **ALERT level C** = Check. Ensure it is not caused by an omission or oversight  
6 **ALERT level G** = General information/check it is not something unexpected

- 1 ALERT type 1 CIF construction/syntax error, inconsistent or missing data  
5 ALERT type 2 Indicator that the structure model may be wrong or deficient  
4 ALERT type 3 Indicator that the structure quality may be low  
1 ALERT type 4 Improvement, methodology, query or suggestion  
0 ALERT type 5 Informative message, check
- 
-

It is advisable to attempt to resolve as many as possible of the alerts in all categories. Often the minor alerts point to easily fixed oversights, errors and omissions in your CIF or refinement strategy, so attention to these fine details can be worthwhile. In order to resolve some of the more serious problems it may be necessary to carry out additional measurements or structure refinements. However, the purpose of your study may justify the reported deviations and the more serious of these should normally be commented upon in the discussion or experimental section of a paper or in the "special\_details" fields of the CIF. checkCIF was carefully designed to identify outliers and unusual parameters, but every test has its limitations and alerts that are not important in a particular case may appear. Conversely, the absence of alerts does not guarantee there are no aspects of the results needing attention. It is up to the individual to critically assess their own results and, if necessary, seek expert advice.

### **Publication of your CIF in IUCr journals**

A basic structural check has been run on your CIF. These basic checks will be run on all CIFs submitted for publication in IUCr journals (*Acta Crystallographica*, *Journal of Applied Crystallography*, *Journal of Synchrotron Radiation*); however, if you intend to submit to *Acta Crystallographica Section C* or *E* or *IUCrData*, you should make sure that full publication checks are run on the final version of your CIF prior to submission.

### **Publication of your CIF in other journals**

Please refer to the *Notes for Authors* of the relevant journal for any special instructions relating to CIF submission.

---

**PLATON version of 07/08/2019; check.def file version of 30/07/2019**

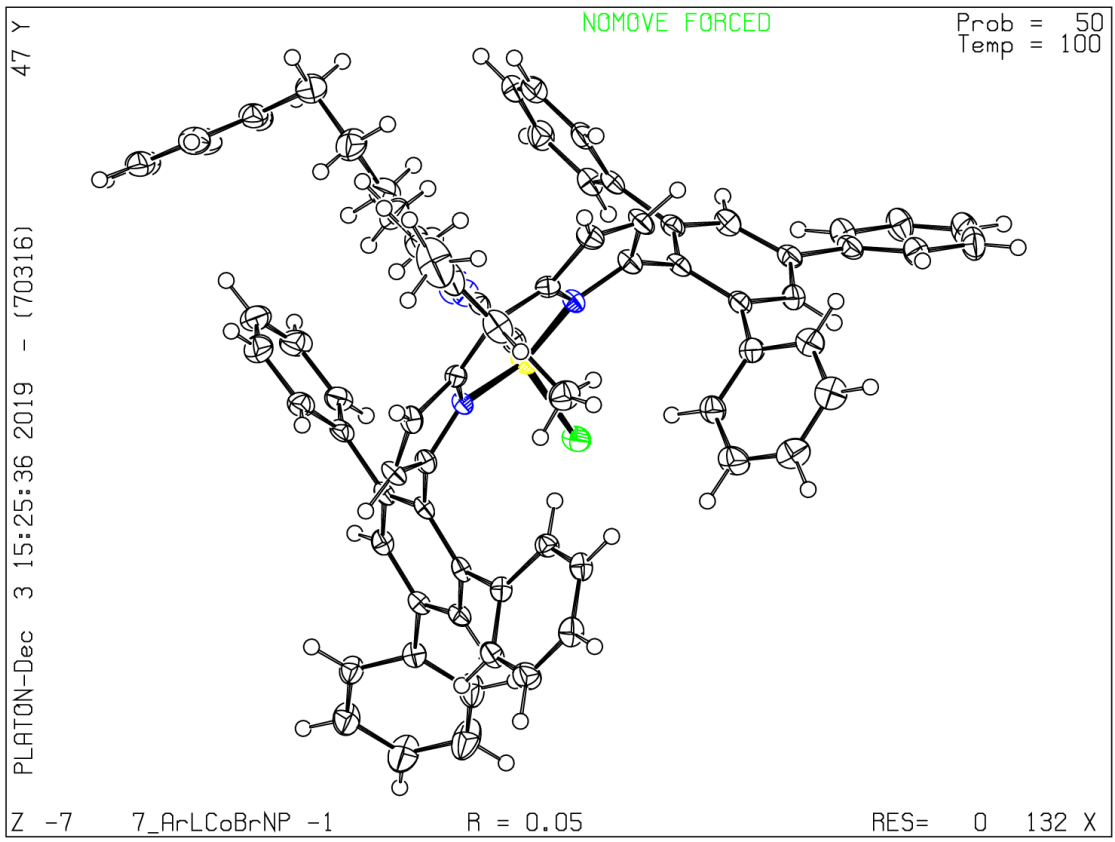

# checkCIF/PLATON report

Structure factors have been supplied for datablock(s) 8\_ArLCoBrN3R2-initial

THIS REPORT IS FOR GUIDANCE ONLY. IF USED AS PART OF A REVIEW PROCEDURE FOR PUBLICATION, IT SHOULD NOT REPLACE THE EXPERTISE OF AN EXPERIENCED CRYSTALLOGRAPHIC REFEREE.

No syntax errors found.      CIF dictionary      Interpreting this report

## Datablock: 8\_ArLCoBrN3R2-initial

---

Bond precision:    C-C = 0.0069 A                      Wavelength=0.71073

Cell:                      a=11.5036(5)      b=21.4756(11)      c=25.3211(13)  
                            alpha=90              beta=99.4205(16)      gamma=90

Temperature:      100 K

|                | Calculated                    | Reported                |
|----------------|-------------------------------|-------------------------|
| Volume         | 6171.1(5)                     | 6171.1(5)               |
| Space group    | P 21/c                        | P 21/c                  |
| Hall group     | -P 2ybc                       | -P 2ybc                 |
| Moiety formula | C72 H62 Br Co N5, 0.5(C6 H14) | C72H62BrCoN5,0.5(C6H14) |
| Sum formula    | C75 H69 Br Co N5              | C75 H69 Br Co N5        |
| Mr             | 1179.19                       | 1179.19                 |
| Dx,g cm-3      | 1.269                         | 1.269                   |
| Z              | 4                             | 4                       |
| Mu (mm-1)      | 0.973                         | 0.973                   |
| F000           | 2464.0                        | 2464.0                  |
| F000'          | 2464.96                       |                         |
| h,k,lmax       | 13,25,30                      | 13,25,30                |
| Nref           | 10995                         | 10930                   |
| Tmin,Tmax      | 0.749,0.856                   | 0.726,0.801             |
| Tmin'          | 0.685                         |                         |

Correction method= # Reported T Limits: Tmin=0.726 Tmax=0.801  
AbsCorr = MULTI-SCAN

Data completeness= 0.994                      Theta(max)= 25.096

R(reflections)= 0.0604( 6924)              wR2(reflections)= 0.1713( 10930)

S = 1.017                                      Npar= 790

---

The following ALERTS were generated. Each ALERT has the format  
**test-name\_ALERT\_alert-type\_alert-level.**  
Click on the hyperlinks for more details of the test.

---

● **Alert level C**

|                   |                                                  |         |        |
|-------------------|--------------------------------------------------|---------|--------|
| PLAT220_ALERT_2_C | Non-Solvent Resd 1 C Ueq(max)/Ueq(min) Range     | 3.3     | Ratio  |
| PLAT230_ALERT_2_C | Hirshfeld Test Diff for N3 --N4                  | 7.0     | s.u.   |
| PLAT242_ALERT_2_C | Low 'MainMol' Ueq as Compared to Neighbors of    | C73     | Check  |
| PLAT250_ALERT_2_C | Large U3/U1 Ratio for Average U(i,j) Tensor .... | 2.8     | Note   |
| PLAT250_ALERT_2_C | Large U3/U1 Ratio for Average U(i,j) Tensor .... | 2.8     | Note   |
| PLAT341_ALERT_3_C | Low Bond Precision on C-C Bonds .....            | 0.00695 | Ang.   |
| PLAT411_ALERT_2_C | Short Inter H...H Contact H17 ..H17              | 2.10    | Ang.   |
|                   | 1-x,1-y,1-z =                                    | 3_666   | Check  |
| PLAT906_ALERT_3_C | Large K Value in the Analysis of Variance .....  | 4.788   | Check  |
| PLAT911_ALERT_3_C | Missing FCF Refl Between Thmin & STh/L= 0.597    | 59      | Report |

---

● **Alert level G**

|                   |                                                  |       |              |
|-------------------|--------------------------------------------------|-------|--------------|
| PLAT002_ALERT_2_G | Number of Distance or Angle Restraints on AtSite | 12    | Note         |
| PLAT003_ALERT_2_G | Number of Uiso or Uij Restrained non-H Atoms ... | 12    | Report       |
| PLAT042_ALERT_1_G | Calc. and Reported MoietyFormula Strings Differ  |       | Please Check |
| PLAT083_ALERT_2_G | SHELXL Second Parameter in WGHT Unusually Large  | 11.70 | Why ?        |
| PLAT171_ALERT_4_G | The CIF-Embedded .res File Contains EADP Records | 6     | Report       |
| PLAT172_ALERT_4_G | The CIF-Embedded .res File Contains DFIX Records | 1     | Report       |
| PLAT175_ALERT_4_G | The CIF-Embedded .res File Contains SAME Records | 2     | Report       |
| PLAT178_ALERT_4_G | The CIF-Embedded .res File Contains SIMU Records | 1     | Report       |
| PLAT186_ALERT_4_G | The CIF-Embedded .res File Contains ISOR Records | 1     | Report       |
| PLAT187_ALERT_4_G | The CIF-Embedded .res File Contains RIGU Records | 1     | Report       |
| PLAT302_ALERT_4_G | Anion/Solvent/Minor-Residue Disorder (Resd 2 )   | 100%  | Note         |
| PLAT302_ALERT_4_G | Anion/Solvent/Minor-Residue Disorder (Resd 3 )   | 100%  | Note         |
| PLAT304_ALERT_4_G | Non-Integer Number of Atoms in ..... Resd 2      | 4.84  | Check        |
| PLAT304_ALERT_4_G | Non-Integer Number of Atoms in ..... Resd 3      | 5.16  | Check        |
| PLAT411_ALERT_2_G | Short Inter H...H Contact H28 ..H2SA             | 2.11  | Ang.         |
|                   | 1-x,1/2+y,3/2-z =                                | 2_656 | Check        |
| PLAT413_ALERT_2_G | Short Inter XH3 .. XHn H27 ..H1SA                | 1.97  | Ang.         |
|                   | 1-x,1/2+y,3/2-z =                                | 2_656 | Check        |
| PLAT413_ALERT_2_G | Short Inter XH3 .. XHn H27 ..H1SC                | 1.78  | Ang.         |
|                   | x,1/2-y,1/2+z =                                  | 4_566 | Check        |
| PLAT720_ALERT_4_G | Number of Unusual/Non-Standard Labels .....      | 28    | Note         |
| PLAT789_ALERT_4_G | Atoms with Negative _atom_site_disorder_group #  | 40    | Check        |
| PLAT860_ALERT_3_G | Number of Least-Squares Restraints .....         | 279   | Note         |
| PLAT909_ALERT_3_G | Percentage of I>2sig(I) Data at Theta(Max) Still | 30%   | Note         |
| PLAT910_ALERT_3_G | Missing # of FCF Reflection(s) Below Theta(Min). | 3     | Note         |
| PLAT933_ALERT_2_G | Number of OMIT Records in Embedded .res File ... | 6     | Note         |
| PLAT978_ALERT_2_G | Number C-C Bonds with Positive Residual Density. | 3     | Info         |

---

0 **ALERT level A** = Most likely a serious problem - resolve or explain  
0 **ALERT level B** = A potentially serious problem, consider carefully  
9 **ALERT level C** = Check. Ensure it is not caused by an omission or oversight  
24 **ALERT level G** = General information/check it is not something unexpected

1 ALERT type 1 CIF construction/syntax error, inconsistent or missing data  
14 ALERT type 2 Indicator that the structure model may be wrong or deficient  
6 ALERT type 3 Indicator that the structure quality may be low  
12 ALERT type 4 Improvement, methodology, query or suggestion  
0 ALERT type 5 Informative message, check

---



It is advisable to attempt to resolve as many as possible of the alerts in all categories. Often the minor alerts point to easily fixed oversights, errors and omissions in your CIF or refinement strategy, so attention to these fine details can be worthwhile. In order to resolve some of the more serious problems it may be necessary to carry out additional measurements or structure refinements. However, the purpose of your study may justify the reported deviations and the more serious of these should normally be commented upon in the discussion or experimental section of a paper or in the "special\_details" fields of the CIF. checkCIF was carefully designed to identify outliers and unusual parameters, but every test has its limitations and alerts that are not important in a particular case may appear. Conversely, the absence of alerts does not guarantee there are no aspects of the results needing attention. It is up to the individual to critically assess their own results and, if necessary, seek expert advice.

### **Publication of your CIF in IUCr journals**

A basic structural check has been run on your CIF. These basic checks will be run on all CIFs submitted for publication in IUCr journals (*Acta Crystallographica*, *Journal of Applied Crystallography*, *Journal of Synchrotron Radiation*); however, if you intend to submit to *Acta Crystallographica Section C* or *E* or *IUCrData*, you should make sure that full publication checks are run on the final version of your CIF prior to submission.

### **Publication of your CIF in other journals**

Please refer to the *Notes for Authors* of the relevant journal for any special instructions relating to CIF submission.

---

**PLATON version of 07/08/2019; check.def file version of 30/07/2019**

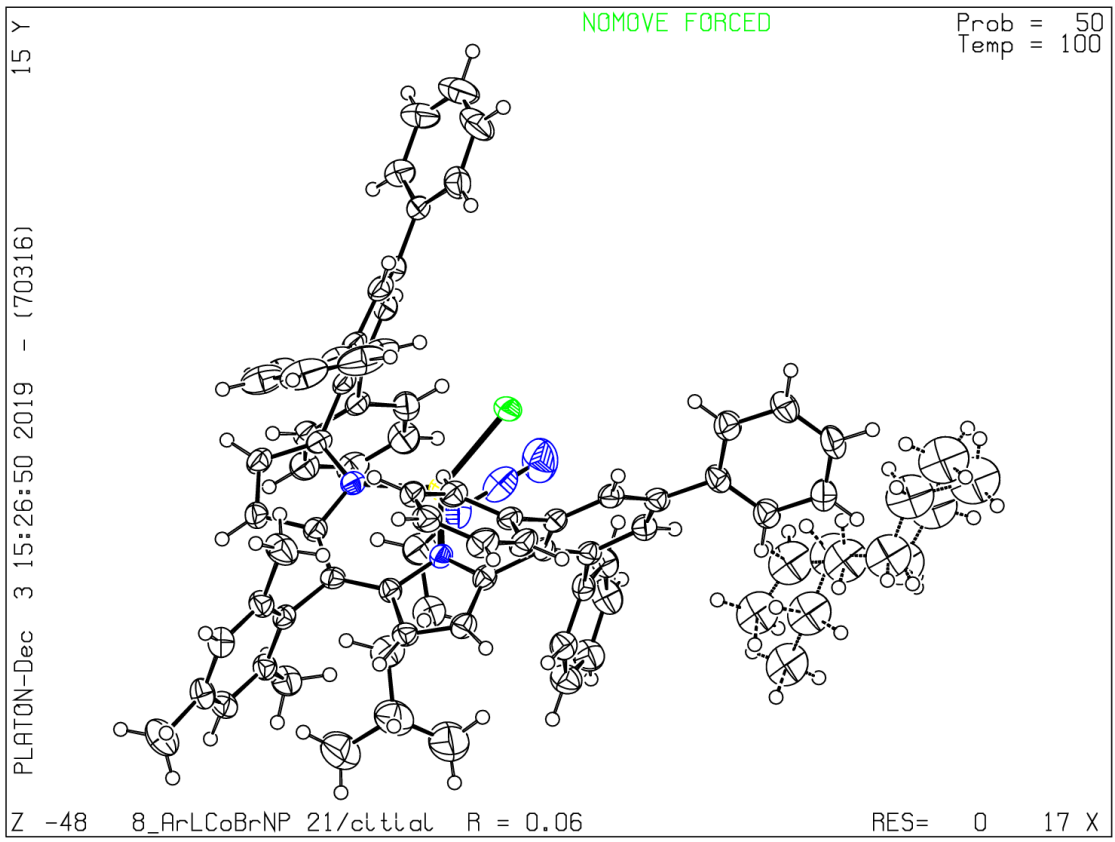

# checkCIF/PLATON report

Structure factors have been supplied for datablock(s) 9\_ArLCoBrNHBn

THIS REPORT IS FOR GUIDANCE ONLY. IF USED AS PART OF A REVIEW PROCEDURE FOR PUBLICATION, IT SHOULD NOT REPLACE THE EXPERTISE OF AN EXPERIENCED CRYSTALLOGRAPHIC REFEREE.

No syntax errors found.      CIF dictionary      Interpreting this report

## Datablock: 9\_ArLCoBrNHBn

---

Bond precision:    C-C = 0.0041 A

Wavelength=0.71073

Cell:                a=11.7393(6)                b=14.6478(7)                c=19.8506(10)  
                      alpha=81.004(1)                beta=80.061(1)                gamma=75.351(1)  
Temperature:        100 K

|                | Calculated                    | Reported                |
|----------------|-------------------------------|-------------------------|
| Volume         | 3230.1(3)                     | 3230.1(3)               |
| Space group    | P -1                          | P -1                    |
| Hall group     | -P 1                          | -P 1                    |
| Moiety formula | 2(C73 H56 Br Co N3), 3(C7 H8) | 2(C73H56BrCoN3),3(C7H8) |
| Sum formula    | C167 H136 Br2 Co2 N6          | C83.50 H68 Br Co N3     |
| Mr             | 2504.49                       | 1252.25                 |
| Dx,g cm-3      | 1.288                         | 1.288                   |
| Z              | 1                             | 2                       |
| Mu (mm-1)      | 0.933                         | 0.933                   |
| F000           | 1304.0                        | 1304.0                  |
| F000'          | 1304.52                       |                         |
| h,k,lmax       | 13,17,23                      | 13,17,23                |
| Nref           | 11459                         | 11449                   |
| Tmin,Tmax      | 0.894,0.946                   | 0.684,0.745             |
| Tmin'          | 0.845                         |                         |

Correction method= # Reported T Limits: Tmin=0.684 Tmax=0.745  
AbsCorr = MULTI-SCAN

Data completeness= 0.999

Theta(max)= 25.061

R(reflections)= 0.0395( 7982)

wR2(reflections)= 0.0833( 11449)

S = 1.009

Npar= 826

---

The following ALERTS were generated. Each ALERT has the format

**test-name\_ALERT\_alert-type\_alert-level.**

Click on the hyperlinks for more details of the test.

---

### ● Alert level C

CRYSC01\_ALERT\_1\_C The word below has not been recognised as a standard identifier.  
maroon  
CRYSC01\_ALERT\_1\_C No recognised colour has been given for crystal colour.  
PLAT250\_ALERT\_2\_C Large U3/U1 Ratio for Average U(i,j) Tensor ... 2.2 Note  
PLAT420\_ALERT\_2\_C D-H Without Acceptor N3 --H3 . Please Check  
PLAT911\_ALERT\_3\_C Missing FCF Refl Between Thmin & STh/L= 0.596 8 Report

---

### ● Alert level G

FORMU01\_ALERT\_1\_G There is a discrepancy between the atom counts in the \_chemical\_formula\_sum and \_chemical\_formula\_moiety. This is usually due to the moiety formula being in the wrong format.  
Atom count from \_chemical\_formula\_sum: C83.5 H68 Br1 Co1 N3  
Atom count from \_chemical\_formula\_moiety: C167 H136 Br2 Co2 N6  
PLAT003\_ALERT\_2\_G Number of Uiso or Uij Restrained non-H Atoms ... 7 Report  
PLAT042\_ALERT\_1\_G Calc. and Reported MoietyFormula Strings Differ Please Check  
PLAT045\_ALERT\_1\_G Calculated and Reported Z Differ by a Factor ... 0.50 Check  
PLAT154\_ALERT\_1\_G The s.u.'s on the Cell Angles are Equal ..(Note) 0.001 Degree  
PLAT178\_ALERT\_4\_G The CIF-Embedded .res File Contains SIMU Records 1 Report  
PLAT232\_ALERT\_2\_G Hirshfeld Test Diff (M-X) Br1 --Co1 . 9.0 s.u.  
PLAT300\_ALERT\_4\_G Atom Site Occupancy of C1S Constrained at 0.5 Check  
PLAT300\_ALERT\_4\_G Atom Site Occupancy of C2S Constrained at 0.5 Check  
PLAT300\_ALERT\_4\_G Atom Site Occupancy of C3S Constrained at 0.5 Check  
PLAT300\_ALERT\_4\_G Atom Site Occupancy of C4S Constrained at 0.5 Check  
PLAT300\_ALERT\_4\_G Atom Site Occupancy of C5S Constrained at 0.5 Check  
PLAT300\_ALERT\_4\_G Atom Site Occupancy of C6S Constrained at 0.5 Check  
PLAT300\_ALERT\_4\_G Atom Site Occupancy of C7S Constrained at 0.5 Check  
PLAT300\_ALERT\_4\_G Atom Site Occupancy of H7SA Constrained at 0.5 Check  
PLAT300\_ALERT\_4\_G Atom Site Occupancy of H1S Constrained at 0.5 Check  
PLAT300\_ALERT\_4\_G Atom Site Occupancy of H7SB Constrained at 0.5 Check  
PLAT300\_ALERT\_4\_G Atom Site Occupancy of H2S Constrained at 0.5 Check  
PLAT300\_ALERT\_4\_G Atom Site Occupancy of H7SC Constrained at 0.5 Check  
PLAT300\_ALERT\_4\_G Atom Site Occupancy of H3S Constrained at 0.5 Check  
PLAT300\_ALERT\_4\_G Atom Site Occupancy of H4S Constrained at 0.5 Check  
PLAT300\_ALERT\_4\_G Atom Site Occupancy of H5S Constrained at 0.5 Check  
PLAT302\_ALERT\_4\_G Anion/Solvent/Minor-Residue Disorder (Resd 2 ) 100% Note  
PLAT304\_ALERT\_4\_G Non-Integer Number of Atoms in ..... Resd 2 7.50 Check  
PLAT720\_ALERT\_4\_G Number of Unusual/Non-Standard Labels ..... 3 Note  
PLAT789\_ALERT\_4\_G Atoms with Negative \_atom\_site\_disorder\_group # 15 Check  
PLAT860\_ALERT\_3\_G Number of Least-Squares Restraints ..... 42 Note  
PLAT909\_ALERT\_3\_G Percentage of I>2sig(I) Data at Theta(Max) Still 45% Note  
PLAT910\_ALERT\_3\_G Missing # of FCF Reflection(s) Below Theta(Min). 1 Note  
PLAT933\_ALERT\_2\_G Number of OMIT Records in Embedded .res File ... 1 Note  
PLAT978\_ALERT\_2\_G Number C-C Bonds with Positive Residual Density. 5 Info

---

0 **ALERT level A** = Most likely a serious problem - resolve or explain  
0 **ALERT level B** = A potentially serious problem, consider carefully  
5 **ALERT level C** = Check. Ensure it is not caused by an omission or oversight  
31 **ALERT level G** = General information/check it is not something unexpected

6 ALERT type 1 CIF construction/syntax error, inconsistent or missing data  
6 ALERT type 2 Indicator that the structure model may be wrong or deficient  
4 ALERT type 3 Indicator that the structure quality may be low  
20 ALERT type 4 Improvement, methodology, query or suggestion  
0 ALERT type 5 Informative message, check

---

---

It is advisable to attempt to resolve as many as possible of the alerts in all categories. Often the minor alerts point to easily fixed oversights, errors and omissions in your CIF or refinement strategy, so attention to these fine details can be worthwhile. In order to resolve some of the more serious problems it may be necessary to carry out additional measurements or structure refinements. However, the purpose of your study may justify the reported deviations and the more serious of these should normally be commented upon in the discussion or experimental section of a paper or in the "special\_details" fields of the CIF. checkCIF was carefully designed to identify outliers and unusual parameters, but every test has its limitations and alerts that are not important in a particular case may appear. Conversely, the absence of alerts does not guarantee there are no aspects of the results needing attention. It is up to the individual to critically assess their own results and, if necessary, seek expert advice.

### **Publication of your CIF in IUCr journals**

A basic structural check has been run on your CIF. These basic checks will be run on all CIFs submitted for publication in IUCr journals (*Acta Crystallographica*, *Journal of Applied Crystallography*, *Journal of Synchrotron Radiation*); however, if you intend to submit to *Acta Crystallographica Section C* or *E* or *IUCrData*, you should make sure that full publication checks are run on the final version of your CIF prior to submission.

### **Publication of your CIF in other journals**

Please refer to the *Notes for Authors* of the relevant journal for any special instructions relating to CIF submission.

---

**PLATON version of 07/08/2019; check.def file version of 30/07/2019**

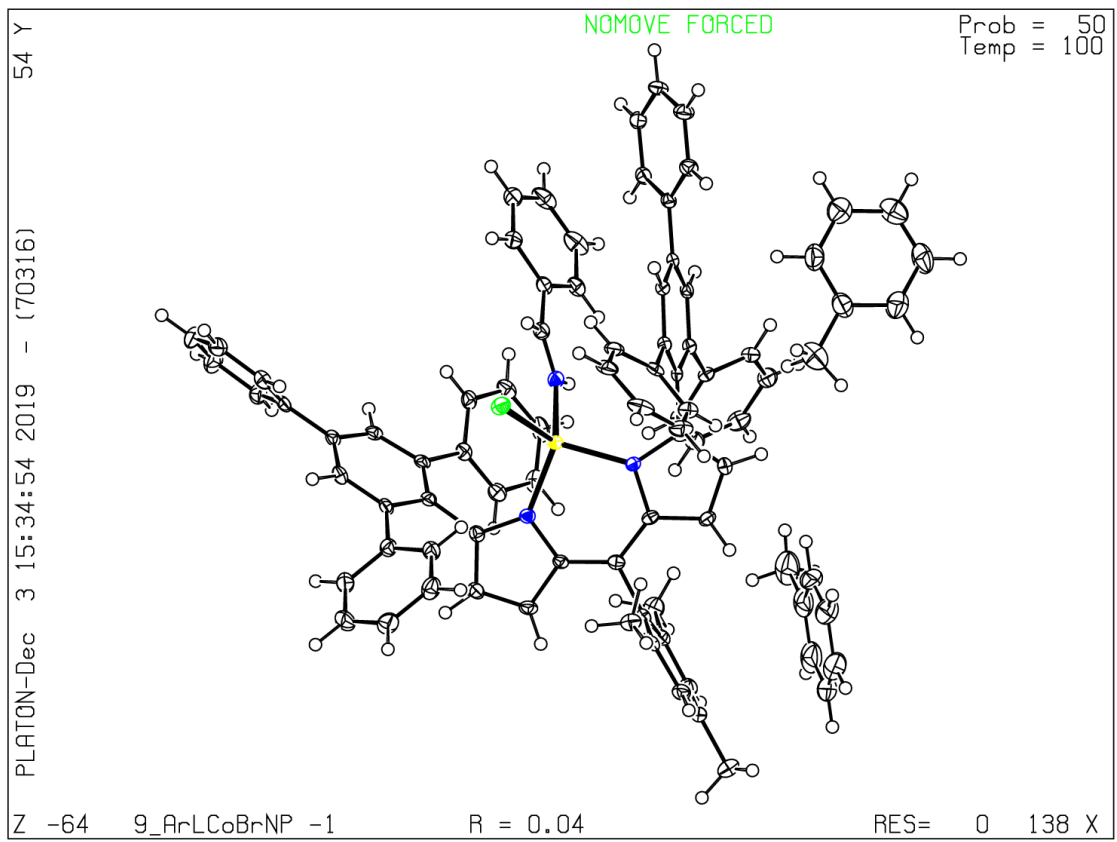

# checkCIF/PLATON report

Structure factors have been supplied for datablock(s) 11\_tBuLCoBr\_dimer

THIS REPORT IS FOR GUIDANCE ONLY. IF USED AS PART OF A REVIEW PROCEDURE FOR PUBLICATION, IT SHOULD NOT REPLACE THE EXPERTISE OF AN EXPERIENCED CRYSTALLOGRAPHIC REFEREE.

No syntax errors found.      CIF dictionary      Interpreting this report

## Datablock: 11\_tBuLCoBr\_dimer

---

Bond precision:    C-C = 0.0051 A

Wavelength=0.71073

Cell:                a=9.8826(5)                b=10.8049(4)                c=13.3280(6)  
                      alpha=108.738(1)        beta=92.612(1)        gamma=112.333(1)  
Temperature:        100 K

|                | Calculated         | Reported           |
|----------------|--------------------|--------------------|
| Volume         | 1223.60(10)        | 1223.60(10)        |
| Space group    | P -1               | P -1               |
| Hall group     | -P 1               | -P 1               |
| Moiety formula | C52 H66 Br2 Co2 N4 | C52H66Br2Co2N4     |
| Sum formula    | C52 H66 Br2 Co2 N4 | C52 H66 Br2 Co2 N4 |
| Mr             | 1024.75            | 1024.76            |
| Dx,g cm-3      | 1.391              | 1.391              |
| Z              | 1                  | 1                  |
| Mu (mm-1)      | 2.349              | 2.349              |
| F000           | 530.0              | 530.0              |
| F000'          | 530.26             |                    |
| h,k,lmax       | 11,12,15           | 11,12,15           |
| Nref           | 4339               | 4306               |
| Tmin,Tmax      | 0.575,0.703        | 0.705,0.745        |
| Tmin'          | 0.550              |                    |

Correction method= # Reported T Limits: Tmin=0.705 Tmax=0.745  
AbsCorr = MULTI-SCAN

Data completeness= 0.992

Theta(max)= 25.072

R(reflections)= 0.0351( 3360)

wR2(reflections)= 0.0725( 4306)

S = 1.027

Npar= 280

---

The following ALERTS were generated. Each ALERT has the format

**test-name\_ALERT\_alert-type\_alert-level.**

Click on the hyperlinks for more details of the test.

---

**● Alert level C**PLAT911\_ALERT\_3\_C Missing FCF Refl Between Thmin & STh/L= 0.596 31 Report

---

**● Alert level G**

|                   |                                                  |              |
|-------------------|--------------------------------------------------|--------------|
| PLAT042_ALERT_1_G | Calc. and Reported MoietyFormula Strings Differ  | Please Check |
| PLAT154_ALERT_1_G | The s.u.'s on the Cell Angles are Equal ..(Note) | 0.001 Degree |
| PLAT909_ALERT_3_G | Percentage of I>2sig(I) Data at Theta(Max) Still | 55% Note     |
| PLAT910_ALERT_3_G | Missing # of FCF Reflection(s) Below Theta(Min). | 2 Note       |
| PLAT978_ALERT_2_G | Number C-C Bonds with Positive Residual Density. | 6 Info       |

---

- 0 **ALERT level A** = Most likely a serious problem - resolve or explain
- 0 **ALERT level B** = A potentially serious problem, consider carefully
- 1 **ALERT level C** = Check. Ensure it is not caused by an omission or oversight
- 5 **ALERT level G** = General information/check it is not something unexpected

- 2 ALERT type 1 CIF construction/syntax error, inconsistent or missing data
  - 1 ALERT type 2 Indicator that the structure model may be wrong or deficient
  - 3 ALERT type 3 Indicator that the structure quality may be low
  - 0 ALERT type 4 Improvement, methodology, query or suggestion
  - 0 ALERT type 5 Informative message, check
- 

It is advisable to attempt to resolve as many as possible of the alerts in all categories. Often the minor alerts point to easily fixed oversights, errors and omissions in your CIF or refinement strategy, so attention to these fine details can be worthwhile. In order to resolve some of the more serious problems it may be necessary to carry out additional measurements or structure refinements. However, the purpose of your study may justify the reported deviations and the more serious of these should normally be commented upon in the discussion or experimental section of a paper or in the "special\_details" fields of the CIF. checkCIF was carefully designed to identify outliers and unusual parameters, but every test has its limitations and alerts that are not important in a particular case may appear. Conversely, the absence of alerts does not guarantee there are no aspects of the results needing attention. It is up to the individual to critically assess their own results and, if necessary, seek expert advice.

**Publication of your CIF in IUCr journals**

A basic structural check has been run on your CIF. These basic checks will be run on all CIFs submitted for publication in IUCr journals (*Acta Crystallographica*, *Journal of Applied Crystallography*, *Journal of Synchrotron Radiation*); however, if you intend to submit to *Acta Crystallographica Section C* or *E* or *IUCrData*, you should make sure that full publication checks are run on the final version of your CIF prior to submission.

**Publication of your CIF in other journals**

Please refer to the *Notes for Authors* of the relevant journal for any special instructions relating to CIF submission.

---



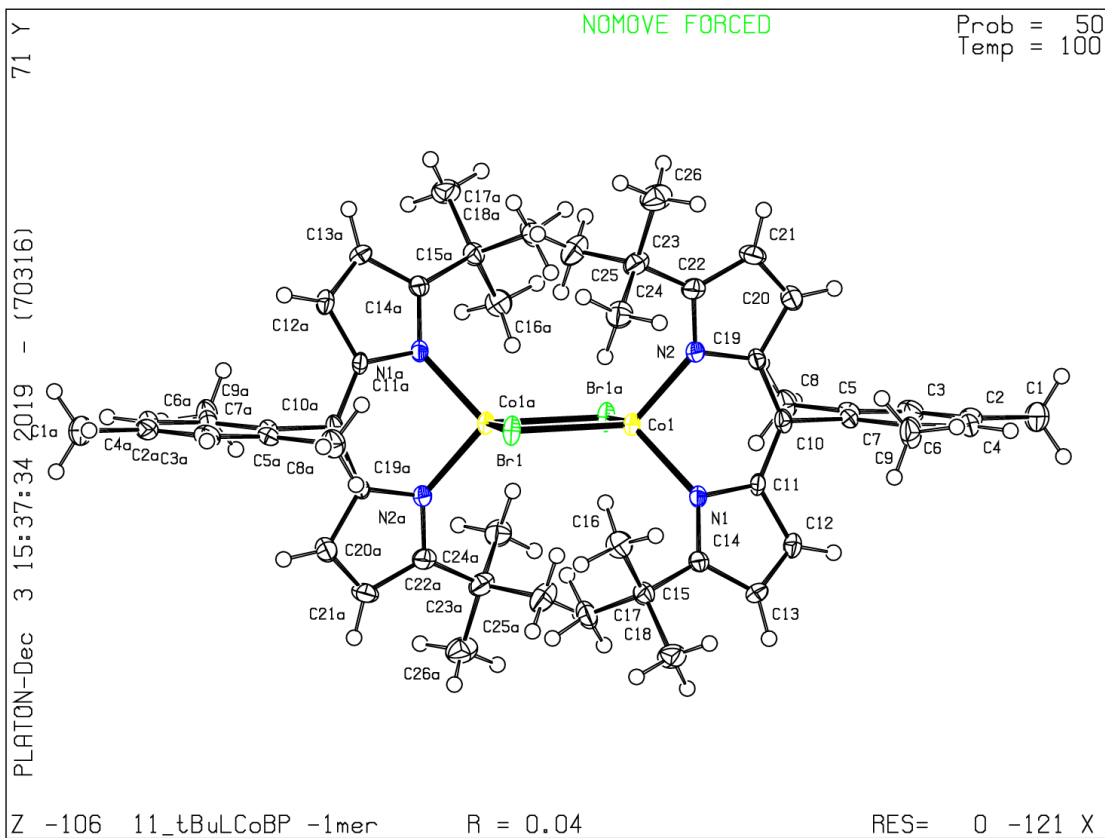

# checkCIF/PLATON report

Structure factors have been supplied for datablock(s) 12\_tBuLCoBrthf

THIS REPORT IS FOR GUIDANCE ONLY. IF USED AS PART OF A REVIEW PROCEDURE FOR PUBLICATION, IT SHOULD NOT REPLACE THE EXPERTISE OF AN EXPERIENCED CRYSTALLOGRAPHIC REFEREE.

No syntax errors found.      CIF dictionary      Interpreting this report

## Datablock: 12\_tBuLCoBrthf

---

Bond precision:    C-C = 0.0034 A

Wavelength=0.71073

Cell:              a=14.3907(10)      b=14.9859(10)      c=15.2440(11)  
                    alpha=92.015(1)      beta=98.561(1)      gamma=115.785(1)  
Temperature:      100 K

|                | Calculated         | Reported           |
|----------------|--------------------|--------------------|
| Volume         | 2908.7(4)          | 2908.7(4)          |
| Space group    | P -1               | P -1               |
| Hall group     | -P 1               | -P 1               |
| Moiety formula | C30 H41 Br Co N2 O | C30H4BrCoN2O       |
| Sum formula    | C30 H41 Br Co N2 O | C30 H41 Br Co N2 O |
| Mr             | 584.48             | 584.49             |
| Dx,g cm-3      | 1.335              | 1.335              |
| Z              | 4                  | 4                  |
| Mu (mm-1)      | 1.987              | 1.987              |
| F000           | 1220.0             | 1220.0             |
| F000'          | 1220.58            |                    |
| h,k,lmax       | 17,17,18           | 17,17,18           |
| Nref           | 10281              | 10172              |
| Tmin,Tmax      | 0.627,0.699        | 0.694,0.745        |
| Tmin'          | 0.447              |                    |

Correction method= # Reported T Limits: Tmin=0.694 Tmax=0.745  
AbsCorr = MULTI-SCAN

Data completeness= 0.989

Theta(max)= 25.048

R(reflections)= 0.0269( 8521)

wR2(reflections)= 0.0608( 10172)

S = 1.063

Npar= 649

---

The following ALERTS were generated. Each ALERT has the format

**test-name\_ALERT\_alert-type\_alert-level.**

Click on the hyperlinks for more details of the test.

---

### ● Alert level C

PLAT601\_ALERT\_2\_C Structure Contains Solvent Accessible VOIDS of . 47 Ang\*\*3  
PLAT911\_ALERT\_3\_C Missing FCF Refl Between Thmin & STh/L= 0.596 110 Report

---

### ● Alert level G

FORMU01\_ALERT\_1\_G There is a discrepancy between the atom counts in the  
\_chemical\_formula\_sum and \_chemical\_formula\_moiety. This is  
usually due to the moiety formula being in the wrong format.  
Atom count from \_chemical\_formula\_sum: C30 H41 Br1 Co1 N2 O1  
Atom count from \_chemical\_formula\_moiety:C30 H4 Br1 Co1 N2 O1  
PLAT042\_ALERT\_1\_G Calc. and Reported MoietyFormula Strings Differ Please Check  
PLAT154\_ALERT\_1\_G The s.u.'s on the Cell Angles are Equal ..(Note) 0.001 Degree  
PLAT720\_ALERT\_4\_G Number of Unusual/Non-Standard Labels ..... 18 Note  
PLAT909\_ALERT\_3\_G Percentage of I>2sig(I) Data at Theta(Max) Still 72% Note  
PLAT978\_ALERT\_2\_G Number C-C Bonds with Positive Residual Density. 10 Info

---

- 0 **ALERT level A** = Most likely a serious problem - resolve or explain  
0 **ALERT level B** = A potentially serious problem, consider carefully  
2 **ALERT level C** = Check. Ensure it is not caused by an omission or oversight  
6 **ALERT level G** = General information/check it is not something unexpected
- 3 ALERT type 1 CIF construction/syntax error, inconsistent or missing data  
2 ALERT type 2 Indicator that the structure model may be wrong or deficient  
2 ALERT type 3 Indicator that the structure quality may be low  
1 ALERT type 4 Improvement, methodology, query or suggestion  
0 ALERT type 5 Informative message, check
- 

It is advisable to attempt to resolve as many as possible of the alerts in all categories. Often the minor alerts point to easily fixed oversights, errors and omissions in your CIF or refinement strategy, so attention to these fine details can be worthwhile. In order to resolve some of the more serious problems it may be necessary to carry out additional measurements or structure refinements. However, the purpose of your study may justify the reported deviations and the more serious of these should normally be commented upon in the discussion or experimental section of a paper or in the "special\_details" fields of the CIF. checkCIF was carefully designed to identify outliers and unusual parameters, but every test has its limitations and alerts that are not important in a particular case may appear. Conversely, the absence of alerts does not guarantee there are no aspects of the results needing attention. It is up to the individual to critically assess their own results and, if necessary, seek expert advice.

### Publication of your CIF in IUCr journals

A basic structural check has been run on your CIF. These basic checks will be run on all CIFs submitted for publication in IUCr journals (*Acta Crystallographica*, *Journal of Applied Crystallography*, *Journal of Synchrotron Radiation*); however, if you intend to submit to *Acta Crystallographica Section C* or *E* or *IUCrData*, you should make sure that full publication checks are run on the final version of your CIF prior to submission.

### Publication of your CIF in other journals

Please refer to the *Notes for Authors* of the relevant journal for any special instructions relating to CIF submission.

PLATON version of 07/08/2019; check.def file version of 30/07/2019

Datablock 12\_tBuLCoBrhf - ellipsoid plot

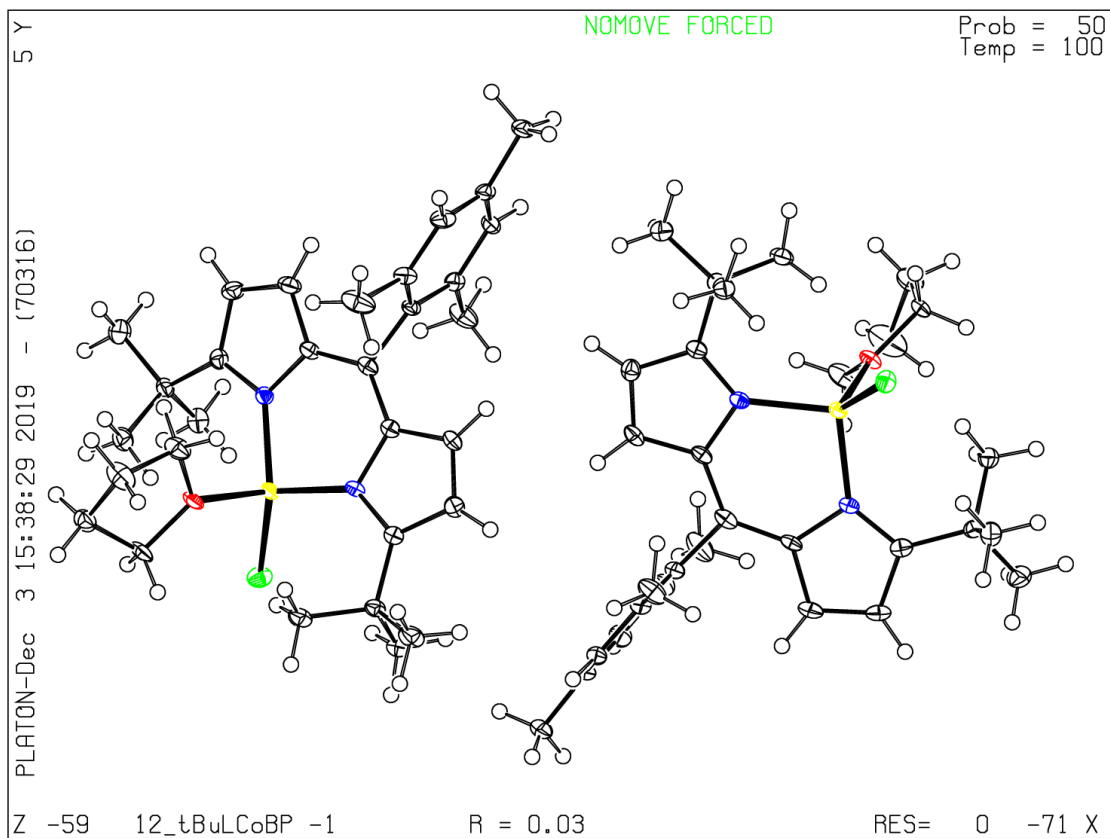

# checkCIF/PLATON report

Structure factors have been supplied for datablock(s) 14\_tBuLCoBrtriazole

THIS REPORT IS FOR GUIDANCE ONLY. IF USED AS PART OF A REVIEW PROCEDURE FOR PUBLICATION, IT SHOULD NOT REPLACE THE EXPERTISE OF AN EXPERIENCED CRYSTALLOGRAPHIC REFEREE.

No syntax errors found.      CIF dictionary      Interpreting this report

## Datablock: 14\_tBuLCoBrtriazole

---

|                 |                                                    |                    |
|-----------------|----------------------------------------------------|--------------------|
| Bond precision: | C-C = 0.0043 A                                     | Wavelength=0.71073 |
| Cell:           | a=10.5174(9)      b=18.4889(16)      c=17.0030(15) |                    |
|                 | alpha=90      beta=105.908(2)      gamma=90        |                    |
| Temperature:    | 100 K                                              |                    |
|                 | Calculated                                         | Reported           |
| Volume          | 3179.7(5)                                          | 3179.7(5)          |
| Space group     | P 21/c                                             | P 21/c             |
| Hall group      | -P 2ybc                                            | -P 2ybc            |
| Moiety formula  | C32 H44 Br Co N5                                   | C32H44BrCoN5       |
| Sum formula     | C32 H44 Br Co N5                                   | C32 H44 Br Co N5   |
| Mr              | 637.55                                             | 637.56             |
| Dx,g cm-3       | 1.332                                              | 1.332              |
| Z               | 4                                                  | 4                  |
| Mu (mm-1)       | 1.825                                              | 1.825              |
| F000            | 1332.0                                             | 1332.0             |
| F000'           | 1332.56                                            |                    |
| h,k,lmax        | 12,22,20                                           | 12,22,20           |
| Nref            | 5637                                               | 5635               |
| Tmin,Tmax       | 0.666,0.880                                        | 0.653,0.745        |
| Tmin'           | 0.573                                              |                    |

Correction method= # Reported T Limits: Tmin=0.653 Tmax=0.745  
AbsCorr = MULTI-SCAN

Data completeness= 1.000      Theta(max)= 25.045

R(reflections)= 0.0352( 4202)      wR2(reflections)= 0.0852( 5635)

S = 1.058      Npar= 361

---

The following ALERTS were generated. Each ALERT has the format  
**test-name\_ALERT\_alert-type\_alert-level.**  
Click on the hyperlinks for more details of the test.

---

### ● Alert level C

|                   |                                                 |       |          |
|-------------------|-------------------------------------------------|-------|----------|
| PLAT094_ALERT_2_C | Ratio of Maximum / Minimum Residual Density ... | 2.38  | Report   |
| PLAT220_ALERT_2_C | Non-Solvent Resd 1 C Ueq(max)/Ueq(min) Range    | 3.6   | Ratio    |
| PLAT911_ALERT_3_C | Missing FCF Refl Between Thmin & STh/L=         | 0.596 | 4 Report |

---

### ● Alert level G

|                   |                                                  |              |
|-------------------|--------------------------------------------------|--------------|
| PLAT042_ALERT_1_G | Calc. and Reported MoietyFormula Strings Differ  | Please Check |
| PLAT793_ALERT_4_G | Model has Chirality at C28 (Centro SPGR)         | R Verify     |
| PLAT909_ALERT_3_G | Percentage of I>2sig(I) Data at Theta(Max) Still | 52% Note     |
| PLAT978_ALERT_2_G | Number C-C Bonds with Positive Residual Density. | 3 Info       |

---

- 0 **ALERT level A** = Most likely a serious problem - resolve or explain
- 0 **ALERT level B** = A potentially serious problem, consider carefully
- 3 **ALERT level C** = Check. Ensure it is not caused by an omission or oversight
- 4 **ALERT level G** = General information/check it is not something unexpected

- 1 ALERT type 1 CIF construction/syntax error, inconsistent or missing data
  - 3 ALERT type 2 Indicator that the structure model may be wrong or deficient
  - 2 ALERT type 3 Indicator that the structure quality may be low
  - 1 ALERT type 4 Improvement, methodology, query or suggestion
  - 0 ALERT type 5 Informative message, check
- 

It is advisable to attempt to resolve as many as possible of the alerts in all categories. Often the minor alerts point to easily fixed oversights, errors and omissions in your CIF or refinement strategy, so attention to these fine details can be worthwhile. In order to resolve some of the more serious problems it may be necessary to carry out additional measurements or structure refinements. However, the purpose of your study may justify the reported deviations and the more serious of these should normally be commented upon in the discussion or experimental section of a paper or in the "special\_details" fields of the CIF. checkCIF was carefully designed to identify outliers and unusual parameters, but every test has its limitations and alerts that are not important in a particular case may appear. Conversely, the absence of alerts does not guarantee there are no aspects of the results needing attention. It is up to the individual to critically assess their own results and, if necessary, seek expert advice.

### Publication of your CIF in IUCr journals

A basic structural check has been run on your CIF. These basic checks will be run on all CIFs submitted for publication in IUCr journals (*Acta Crystallographica*, *Journal of Applied Crystallography*, *Journal of Synchrotron Radiation*); however, if you intend to submit to *Acta Crystallographica Section C* or *E* or *IUCrData*, you should make sure that full publication checks are run on the final version of your CIF prior to submission.

### Publication of your CIF in other journals

Please refer to the *Notes for Authors* of the relevant journal for any special instructions relating to CIF submission.

---

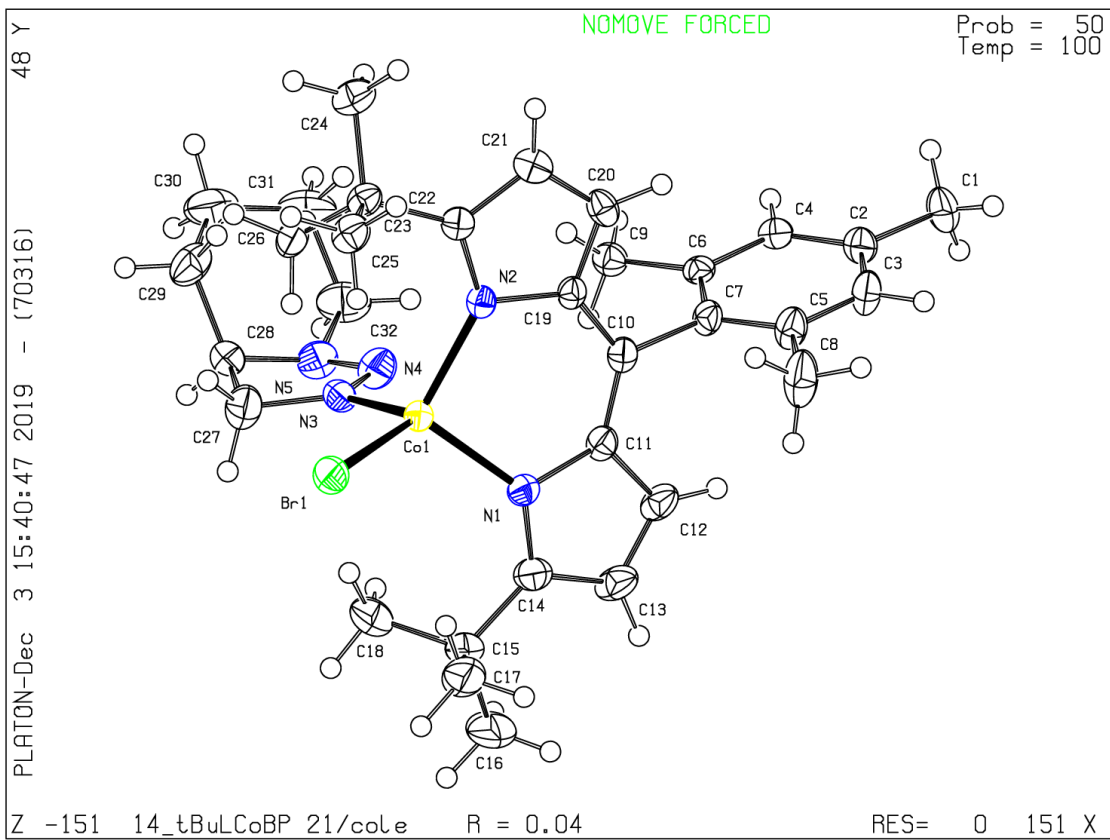

# checkCIF/PLATON report

Structure factors have been supplied for datablock(s) 16\_tBuLCoBr2-phenylpyrrolidine

THIS REPORT IS FOR GUIDANCE ONLY. IF USED AS PART OF A REVIEW PROCEDURE FOR PUBLICATION, IT SHOULD NOT REPLACE THE EXPERTISE OF AN EXPERIENCED CRYSTALLOGRAPHIC REFEREE.

No syntax errors found.      CIF dictionary      Interpreting this report

## Datablock: 16\_tBuLCoBr2-phenylpyrrolidine

---

Bond precision:    C-C = 0.0071 A                      Wavelength=0.71073

Cell:                      a=9.3829(7)                      b=13.2694(10)                      c=14.2996(11)  
                                    alpha=67.174(2)                      beta=84.707(2)                      gamma=82.391(2)

Temperature:    100 K

|                | Calculated       | Reported         |
|----------------|------------------|------------------|
| Volume         | 1624.9(2)        | 1624.9(2)        |
| Space group    | P -1             | P -1             |
| Hall group     | -P 1             | -P 1             |
| Moiety formula | C36 H46 Br Co N3 | C36H46BrCoN3     |
| Sum formula    | C36 H46 Br Co N3 | C36 H46 Br Co N3 |
| Mr             | 659.59           | 659.60           |
| Dx,g cm-3      | 1.348            | 1.348            |
| Z              | 2                | 2                |
| Mu (mm-1)      | 1.786            | 1.786            |
| F000           | 690.0            | 690.0            |
| F000'          | 690.30           |                  |
| h,k,lmax       | 11,15,17         | 11,15,17         |
| Nref           | 5767             | 5746             |
| Tmin,Tmax      | 0.707,0.898      | 0.690,0.745      |
| Tmin'          | 0.693            |                  |

Correction method= # Reported T Limits: Tmin=0.690 Tmax=0.745  
AbsCorr = MULTI-SCAN

Data completeness= 0.996                      Theta(max)= 25.077

R(reflections)= 0.0546( 3735)                      wR2(reflections)= 0.1210( 5746)

S = 1.014                      Npar= 383

---

The following ALERTS were generated. Each ALERT has the format  
**test-name\_ALERT\_alert-type\_alert-level.**  
Click on the hyperlinks for more details of the test.



---

### ● Alert level C

|                   |                                                  |         |        |
|-------------------|--------------------------------------------------|---------|--------|
| PLAT094_ALERT_2_C | Ratio of Maximum / Minimum Residual Density .... | 2.40    | Report |
| PLAT341_ALERT_3_C | Low Bond Precision on C-C Bonds .....            | 0.00708 | Ang.   |
| PLAT906_ALERT_3_C | Large K Value in the Analysis of Variance .....  | 2.954   | Check  |
| PLAT910_ALERT_3_C | Missing # of FCF Reflection(s) Below Theta(Min). | 5       | Note   |
| PLAT911_ALERT_3_C | Missing FCF Refl Between Thmin & STh/L= 0.596    | 16      | Report |
| PLAT978_ALERT_2_C | Number C-C Bonds with Positive Residual Density. | 0       | Info   |

---

### ● Alert level G

|                   |                                                  |        |        |
|-------------------|--------------------------------------------------|--------|--------|
| PLAT042_ALERT_1_G | Calc. and Reported MoietyFormula Strings Differ  | Please | Check  |
| PLAT154_ALERT_1_G | The s.u.'s on the Cell Angles are Equal ..(Note) | 0.002  | Degree |
| PLAT793_ALERT_4_G | Model has Chirality at N3 (Centro SPGR)          | S      | Verify |
| PLAT793_ALERT_4_G | Model has Chirality at C30 (Centro SPGR)         | R      | Verify |
| PLAT909_ALERT_3_G | Percentage of I>2sig(I) Data at Theta(Max) Still | 32%    | Note   |

---

- 0 **ALERT level A** = Most likely a serious problem - resolve or explain  
0 **ALERT level B** = A potentially serious problem, consider carefully  
6 **ALERT level C** = Check. Ensure it is not caused by an omission or oversight  
5 **ALERT level G** = General information/check it is not something unexpected
- 2 ALERT type 1 CIF construction/syntax error, inconsistent or missing data  
2 ALERT type 2 Indicator that the structure model may be wrong or deficient  
5 ALERT type 3 Indicator that the structure quality may be low  
2 ALERT type 4 Improvement, methodology, query or suggestion  
0 ALERT type 5 Informative message, check
- 

It is advisable to attempt to resolve as many as possible of the alerts in all categories. Often the minor alerts point to easily fixed oversights, errors and omissions in your CIF or refinement strategy, so attention to these fine details can be worthwhile. In order to resolve some of the more serious problems it may be necessary to carry out additional measurements or structure refinements. However, the purpose of your study may justify the reported deviations and the more serious of these should normally be commented upon in the discussion or experimental section of a paper or in the "special\_details" fields of the CIF. checkCIF was carefully designed to identify outliers and unusual parameters, but every test has its limitations and alerts that are not important in a particular case may appear. Conversely, the absence of alerts does not guarantee there are no aspects of the results needing attention. It is up to the individual to critically assess their own results and, if necessary, seek expert advice.

### Publication of your CIF in IUCr journals

A basic structural check has been run on your CIF. These basic checks will be run on all CIFs submitted for publication in IUCr journals (*Acta Crystallographica*, *Journal of Applied Crystallography*, *Journal of Synchrotron Radiation*); however, if you intend to submit to *Acta Crystallographica Section C* or *E* or *IUCrData*, you should make sure that full publication checks are run on the final version of your CIF prior to submission.

### Publication of your CIF in other journals

Please refer to the *Notes for Authors* of the relevant journal for any special instructions relating to CIF submission.



# checkCIF/PLATON report

Structure factors have been supplied for datablock(s) 18\_tBuLCoCl22-dimethylpyrrolidine

THIS REPORT IS FOR GUIDANCE ONLY. IF USED AS PART OF A REVIEW PROCEDURE FOR PUBLICATION, IT SHOULD NOT REPLACE THE EXPERTISE OF AN EXPERIENCED CRYSTALLOGRAPHIC REFEREE.

No syntax errors found.      CIF dictionary      Interpreting this report

## Datablock: 18\_tBuLCoCl22-dimethylpyrrolidine

---

Bond precision:      = 0.0000 A      Wavelength=0.71073

Cell:                      a=19.6834(9)                      b=8.7971(5)                      c=17.5251(8)  
                                    alpha=90                      beta=90                      gamma=90  
Temperature:              100 K

|                        | Calculated                     | Reported                   |
|------------------------|--------------------------------|----------------------------|
| Volume                 | 3034.6(3)                      | 3034.6(3)                  |
| Space group            | P n m a                        | P n m a                    |
| Hall group             | -P 2ac 2n                      | -P 2ac 2n                  |
| Moiety formula         | 2(C16 H23 Cl0.50 Co0.50 N1.50) | 2(C16H23Cl0.50Co0.50N1.50) |
| Sum formula            | C32 H46 Cl Co N3               | C32 H46 Cl Co N3           |
| Mr                     | 567.10                         | 567.10                     |
| Dx, g cm <sup>-3</sup> | 1.241                          | 1.241                      |
| Z                      | 4                              | 4                          |
| Mu (mm <sup>-1</sup> ) | 0.678                          | 0.678                      |
| F000                   | 1212.0                         | 1212.0                     |
| F000'                  | 1214.28                        |                            |
| h,k,lmax               | 23,10,20                       | 23,10,20                   |
| Nref                   | 2887                           | 2879                       |
| Tmin,Tmax              | 0.885,0.916                    | 0.687,0.745                |
| Tmin'                  | 0.873                          |                            |

Correction method= # Reported T Limits: Tmin=0.687 Tmax=0.745  
AbsCorr = MULTI-SCAN

Data completeness= 0.997                      Theta(max)= 25.056

R(reflections)= 0.0659( 2072)                      wR2(reflections)= 0.1392( 2879)

S = 1.201                      Npar= 399

---

The following ALERTS were generated. Each ALERT has the format

**test-name\_ALERT\_alert-type\_alert-level.**

Click on the hyperlinks for more details of the test.

---

**Alert level B**

PLAT088\_ALERT\_3\_B Poor Data / Parameter Ratio ..... 7.22 Note

**Author Response: This structure is in a high symmetry space group (Pnma). It is full-molecule disorder along a mirror plane, and the 2,2-dimethylpyrrolidine moiety is further disorder in two positions. The restraints on bond lengths and atomic displacement parameters have been applied to improve the observed Data/Parameter ratio and stabilize the model.**

---

**Alert level C**

PLAT215\_ALERT\_3\_C Disordered C10 has ADP max/min Ratio ..... 3.2 Note  
PLAT220\_ALERT\_2\_C Non-Solvent Resd 1 C Ueq(max)/Ueq(min) Range 3.7 Ratio  
PLAT906\_ALERT\_3\_C Large K Value in the Analysis of Variance ..... 8.871 Check  
PLAT906\_ALERT\_3\_C Large K Value in the Analysis of Variance ..... 2.576 Check  
PLAT911\_ALERT\_3\_C Missing FCF Refl Between Thmin & STh/L= 0.596 6 Report

---

**Alert level G**

FORMU01\_ALERT\_1\_G There is a discrepancy between the atom counts in the  
\_chemical\_formula\_sum and \_chemical\_formula\_moiety. This is  
usually due to the moiety formula being in the wrong format.  
Atom count from \_chemical\_formula\_sum: C32 H46 Cl1 Co1 N3  
Atom count from \_chemical\_formula\_moiety:C53 H46 Co1 N3

PLAT002\_ALERT\_2\_G Number of Distance or Angle Restraints on AtSite 23 Note  
PLAT003\_ALERT\_2\_G Number of Uiso or Uij Restrained non-H Atoms ... 42 Report  
PLAT007\_ALERT\_5\_G Number of Unrefined Donor-H Atoms ..... 2 Report  
PLAT042\_ALERT\_1\_G Calc. and Reported MoietyFormula Strings Differ Please Check  
PLAT083\_ALERT\_2\_G SHELXL Second Parameter in WGHT Unusually Large 8.34 Why ?  
PLAT174\_ALERT\_4\_G The CIF-Embedded .res File Contains FLAT Records 1 Report  
PLAT175\_ALERT\_4\_G The CIF-Embedded .res File Contains SAME Records 3 Report  
PLAT176\_ALERT\_4\_G The CIF-Embedded .res File Contains SADI Records 3 Report  
PLAT178\_ALERT\_4\_G The CIF-Embedded .res File Contains SIMU Records 1 Report  
PLAT187\_ALERT\_4\_G The CIF-Embedded .res File Contains RIGU Records 1 Report  
PLAT300\_ALERT\_4\_G Atom Site Occupancy of Co1 Constrained at 0.5 Check  
PLAT300\_ALERT\_4\_G Atom Site Occupancy of Cl1 Constrained at 0.5 Check  
PLAT300\_ALERT\_4\_G Atom Site Occupancy of N1 Constrained at 0.5 Check  
PLAT300\_ALERT\_4\_G Atom Site Occupancy of N2 Constrained at 0.5 Check  
PLAT300\_ALERT\_4\_G Atom Site Occupancy of C1 Constrained at 0.5 Check  
PLAT300\_ALERT\_4\_G Atom Site Occupancy of C2 Constrained at 0.5 Check  
PLAT300\_ALERT\_4\_G Atom Site Occupancy of C3 Constrained at 0.5 Check  
PLAT300\_ALERT\_4\_G Atom Site Occupancy of C4 Constrained at 0.5 Check  
PLAT300\_ALERT\_4\_G Atom Site Occupancy of C5 Constrained at 0.5 Check  
PLAT300\_ALERT\_4\_G Atom Site Occupancy of C6 Constrained at 0.5 Check  
PLAT300\_ALERT\_4\_G Atom Site Occupancy of C7 Constrained at 0.5 Check  
PLAT300\_ALERT\_4\_G Atom Site Occupancy of C8 Constrained at 0.5 Check  
PLAT300\_ALERT\_4\_G Atom Site Occupancy of C9 Constrained at 0.5 Check  
PLAT300\_ALERT\_4\_G Atom Site Occupancy of C10 Constrained at 0.5 Check  
PLAT300\_ALERT\_4\_G Atom Site Occupancy of C11 Constrained at 0.5 Check  
PLAT300\_ALERT\_4\_G Atom Site Occupancy of C12 Constrained at 0.5 Check  
PLAT300\_ALERT\_4\_G Atom Site Occupancy of C13 Constrained at 0.5 Check  
PLAT300\_ALERT\_4\_G Atom Site Occupancy of C14 Constrained at 0.5 Check  
PLAT300\_ALERT\_4\_G Atom Site Occupancy of C15 Constrained at 0.5 Check

|                   |                                                  |                |       |        |
|-------------------|--------------------------------------------------|----------------|-------|--------|
| PLAT300_ALERT_4_G | Atom Site Occupancy of C16                       | Constrained at | 0.5   | Check  |
| PLAT300_ALERT_4_G | Atom Site Occupancy of C17                       | Constrained at | 0.5   | Check  |
| PLAT300_ALERT_4_G | Atom Site Occupancy of C21                       | Constrained at | 0.5   | Check  |
| PLAT300_ALERT_4_G | Atom Site Occupancy of C22                       | Constrained at | 0.5   | Check  |
| PLAT300_ALERT_4_G | Atom Site Occupancy of C23                       | Constrained at | 0.5   | Check  |
| PLAT300_ALERT_4_G | Atom Site Occupancy of C24                       | Constrained at | 0.5   | Check  |
| PLAT300_ALERT_4_G | Atom Site Occupancy of C25                       | Constrained at | 0.5   | Check  |
| PLAT300_ALERT_4_G | Atom Site Occupancy of C26                       | Constrained at | 0.5   | Check  |
| PLAT300_ALERT_4_G | Atom Site Occupancy of C27                       | Constrained at | 0.5   | Check  |
| PLAT300_ALERT_4_G | Atom Site Occupancy of C28                       | Constrained at | 0.5   | Check  |
| PLAT300_ALERT_4_G | Atom Site Occupancy of C29                       | Constrained at | 0.5   | Check  |
| PLAT300_ALERT_4_G | Atom Site Occupancy of H3B                       | Constrained at | 0.5   | Check  |
| PLAT300_ALERT_4_G | Atom Site Occupancy of H4                        | Constrained at | 0.5   | Check  |
| PLAT300_ALERT_4_G | Atom Site Occupancy of H7A                       | Constrained at | 0.5   | Check  |
| PLAT300_ALERT_4_G | Atom Site Occupancy of H7B                       | Constrained at | 0.5   | Check  |
| PLAT300_ALERT_4_G | Atom Site Occupancy of H7C                       | Constrained at | 0.5   | Check  |
| PLAT300_ALERT_4_G | Atom Site Occupancy of H8A                       | Constrained at | 0.5   | Check  |
| PLAT300_ALERT_4_G | Atom Site Occupancy of H8B                       | Constrained at | 0.5   | Check  |
| PLAT300_ALERT_4_G | Atom Site Occupancy of H8C                       | Constrained at | 0.5   | Check  |
| PLAT300_ALERT_4_G | Atom Site Occupancy of H9A                       | Constrained at | 0.5   | Check  |
| PLAT300_ALERT_4_G | Atom Site Occupancy of H9B                       | Constrained at | 0.5   | Check  |
| PLAT300_ALERT_4_G | Atom Site Occupancy of H9C                       | Constrained at | 0.5   | Check  |
| PLAT300_ALERT_4_G | Atom Site Occupancy of H11                       | Constrained at | 0.5   | Check  |
| PLAT300_ALERT_4_G | Atom Site Occupancy of H12                       | Constrained at | 0.5   | Check  |
| PLAT300_ALERT_4_G | Atom Site Occupancy of H15A                      | Constrained at | 0.5   | Check  |
| PLAT300_ALERT_4_G | Atom Site Occupancy of H15B                      | Constrained at | 0.5   | Check  |
| PLAT300_ALERT_4_G | Atom Site Occupancy of H15C                      | Constrained at | 0.5   | Check  |
| PLAT300_ALERT_4_G | Atom Site Occupancy of H16A                      | Constrained at | 0.5   | Check  |
| PLAT300_ALERT_4_G | Atom Site Occupancy of H16B                      | Constrained at | 0.5   | Check  |
| PLAT300_ALERT_4_G | Atom Site Occupancy of H16C                      | Constrained at | 0.5   | Check  |
| PLAT300_ALERT_4_G | Atom Site Occupancy of H17A                      | Constrained at | 0.5   | Check  |
| PLAT300_ALERT_4_G | Atom Site Occupancy of H17B                      | Constrained at | 0.5   | Check  |
| PLAT300_ALERT_4_G | Atom Site Occupancy of H17C                      | Constrained at | 0.5   | Check  |
| PLAT300_ALERT_4_G | Atom Site Occupancy of H23                       | Constrained at | 0.5   | Check  |
| PLAT300_ALERT_4_G | Atom Site Occupancy of H25                       | Constrained at | 0.5   | Check  |
| PLAT300_ALERT_4_G | Atom Site Occupancy of H27A                      | Constrained at | 0.5   | Check  |
| PLAT300_ALERT_4_G | Atom Site Occupancy of H27B                      | Constrained at | 0.5   | Check  |
| PLAT300_ALERT_4_G | Atom Site Occupancy of H27C                      | Constrained at | 0.5   | Check  |
| PLAT300_ALERT_4_G | Atom Site Occupancy of H28A                      | Constrained at | 0.5   | Check  |
| PLAT300_ALERT_4_G | Atom Site Occupancy of H28B                      | Constrained at | 0.5   | Check  |
| PLAT300_ALERT_4_G | Atom Site Occupancy of H28C                      | Constrained at | 0.5   | Check  |
| PLAT300_ALERT_4_G | Atom Site Occupancy of H29A                      | Constrained at | 0.5   | Check  |
| PLAT300_ALERT_4_G | Atom Site Occupancy of H29B                      | Constrained at | 0.5   | Check  |
| PLAT300_ALERT_4_G | Atom Site Occupancy of H29C                      | Constrained at | 0.5   | Check  |
| PLAT301_ALERT_3_G | Main Residue Disorder .....(Resd 1 )             |                | 100%  | Note   |
| PLAT304_ALERT_4_G | Non-Integer Number of Atoms in ..... Resd 1      |                | 41.50 | Check  |
| PLAT607_ALERT_4_G | VOID Test Skipped Due to Severe Disorder .....   |                |       | ! Info |
| PLAT789_ALERT_4_G | Atoms with Negative _atom_site_disorder_group #  |                | 103   | Check  |
| PLAT860_ALERT_3_G | Number of Least-Squares Restraints .....         |                | 780   | Note   |
| PLAT909_ALERT_3_G | Percentage of I>2sig(I) Data at Theta(Max) Still |                | 35%   | Note   |
| PLAT910_ALERT_3_G | Missing # of FCF Reflection(s) Below Theta(Min). |                | 2     | Note   |

---

0 **ALERT level A** = Most likely a serious problem - resolve or explain  
1 **ALERT level B** = A potentially serious problem, consider carefully  
5 **ALERT level C** = Check. Ensure it is not caused by an omission or oversight  
81 **ALERT level G** = General information/check it is not something unexpected

2 **ALERT type 1** CIF construction/syntax error, inconsistent or missing data

4 ALERT type 2 Indicator that the structure model may be wrong or deficient  
9 ALERT type 3 Indicator that the structure quality may be low  
71 ALERT type 4 Improvement, methodology, query or suggestion  
1 ALERT type 5 Informative message, check

---

---

It is advisable to attempt to resolve as many as possible of the alerts in all categories. Often the minor alerts point to easily fixed oversights, errors and omissions in your CIF or refinement strategy, so attention to these fine details can be worthwhile. In order to resolve some of the more serious problems it may be necessary to carry out additional measurements or structure refinements. However, the purpose of your study may justify the reported deviations and the more serious of these should normally be commented upon in the discussion or experimental section of a paper or in the "special\_details" fields of the CIF. checkCIF was carefully designed to identify outliers and unusual parameters, but every test has its limitations and alerts that are not important in a particular case may appear. Conversely, the absence of alerts does not guarantee there are no aspects of the results needing attention. It is up to the individual to critically assess their own results and, if necessary, seek expert advice.

### **Publication of your CIF in IUCr journals**

A basic structural check has been run on your CIF. These basic checks will be run on all CIFs submitted for publication in IUCr journals (*Acta Crystallographica*, *Journal of Applied Crystallography*, *Journal of Synchrotron Radiation*); however, if you intend to submit to *Acta Crystallographica Section C* or *E* or *IUCrData*, you should make sure that full publication checks are run on the final version of your CIF prior to submission.

### **Publication of your CIF in other journals**

Please refer to the *Notes for Authors* of the relevant journal for any special instructions relating to CIF submission.

---

**PLATON version of 07/08/2019; check.def file version of 30/07/2019**

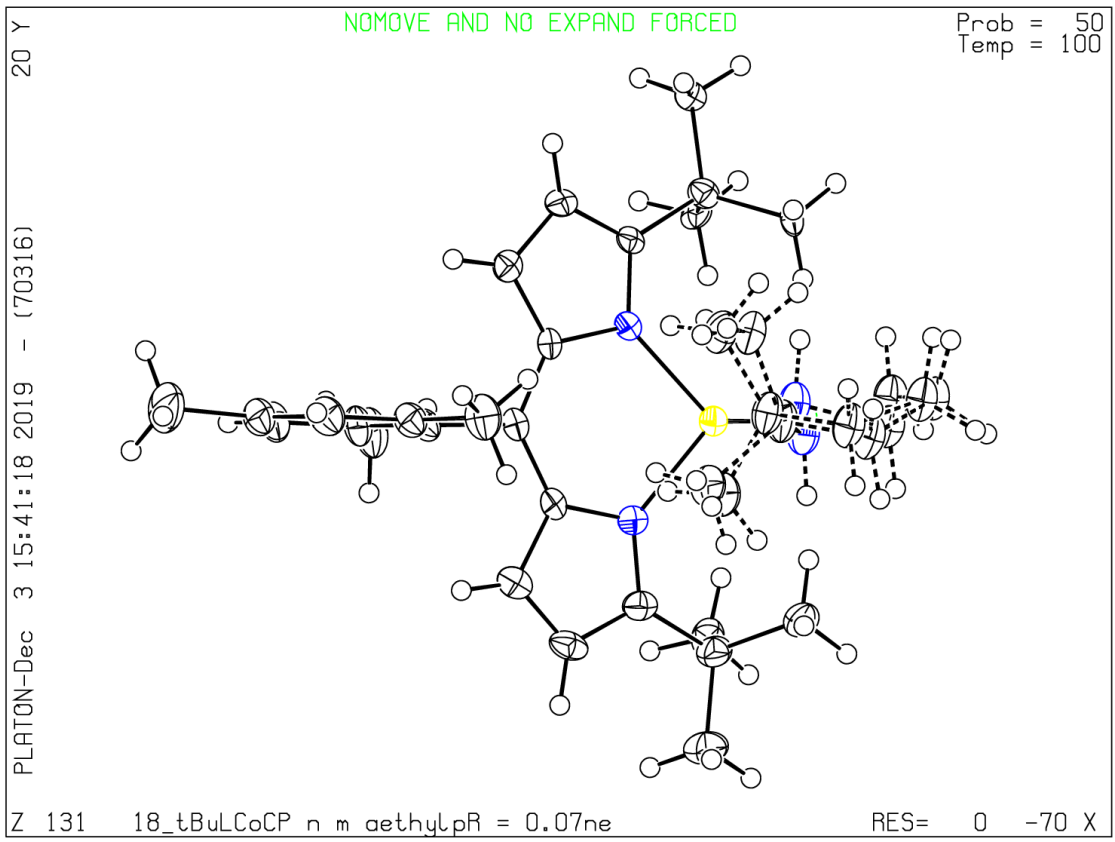

# checkCIF/PLATON report

Structure factors have been supplied for datablock(s) 20\_tBuLCoClnBu-imine

THIS REPORT IS FOR GUIDANCE ONLY. IF USED AS PART OF A REVIEW PROCEDURE FOR PUBLICATION, IT SHOULD NOT REPLACE THE EXPERTISE OF AN EXPERIENCED CRYSTALLOGRAPHIC REFEREE.

No syntax errors found.      CIF dictionary      Interpreting this report

## Datablock: 20\_tBuLCoClnBu-imine

---

Bond precision:    C-C = 0.0064 A                      Wavelength=0.71073

Cell:                      a=13.892(2)              b=13.8768(18)              c=16.289(2)  
                            alpha=90              beta=111.131(2)              gamma=90

Temperature:              100 K

|                | Calculated       | Reported         |
|----------------|------------------|------------------|
| Volume         | 2929.0(7)        | 2928.9(7)        |
| Space group    | P 21/n           | P 21/n           |
| Hall group     | -P 2yn           | -P 2yn           |
| Moiety formula | C30 H42 Cl Co N3 | C30H42ClCoN3     |
| Sum formula    | C30 H42 Cl Co N3 | C30 H42 Cl Co N3 |
| Mr             | 539.05           | 539.04           |
| Dx,g cm-3      | 1.222            | 1.222            |
| Z              | 4                | 4                |
| Mu (mm-1)      | 0.699            | 0.699            |
| F000           | 1148.0           | 1148.0           |
| F000'          | 1150.26          |                  |
| h,k,lmax       | 16,16,19         | 16,16,19         |
| Nref           | 5193             | 5133             |
| Tmin,Tmax      | 0.860,0.939      | 0.637,0.745      |
| Tmin'          | 0.756            |                  |

Correction method= # Reported T Limits: Tmin=0.637 Tmax=0.745  
AbsCorr = MULTI-SCAN

Data completeness= 0.988                      Theta(max)= 25.052

R(reflections)= 0.0577( 3010)              wR2(reflections)= 0.1286( 5133)

S = 0.996                      Npar= 379

---

The following ALERTS were generated. Each ALERT has the format  
**test-name\_ALERT\_alert-type\_alert-level.**  
Click on the hyperlinks for more details of the test.



---

● **Alert level C**

|                   |                                                 |         |        |
|-------------------|-------------------------------------------------|---------|--------|
| PLAT220_ALERT_2_C | NonSolvent Resd 1 C Ueq(max) / Ueq(min) Range   | 3.4     | Ratio  |
| PLAT341_ALERT_3_C | Low Bond Precision on C-C Bonds .....           | 0.00642 | Ang.   |
| PLAT906_ALERT_3_C | Large K Value in the Analysis of Variance ..... | 3.036   | Check  |
| PLAT911_ALERT_3_C | Missing FCF Refl Between Thmin & STh/L= 0.596   | 61      | Report |

---

● **Alert level G**

|                   |                                                  |       |              |
|-------------------|--------------------------------------------------|-------|--------------|
| PLAT002_ALERT_2_G | Number of Distance or Angle Restraints on AtSite | 16    | Note         |
| PLAT003_ALERT_2_G | Number of Uiso or Uij Restrained non-H Atoms ... | 12    | Report       |
| PLAT007_ALERT_5_G | Number of Unrefined Donor-H Atoms .....          | 2     | Report       |
| PLAT042_ALERT_1_G | Calc. and Reported MoietyFormula Strings Differ  |       | Please Check |
| PLAT171_ALERT_4_G | The CIF-Embedded .res File Contains EADP Records | 2     | Report       |
| PLAT175_ALERT_4_G | The CIF-Embedded .res File Contains SAME Records | 1     | Report       |
| PLAT176_ALERT_4_G | The CIF-Embedded .res File Contains SADI Records | 2     | Report       |
| PLAT178_ALERT_4_G | The CIF-Embedded .res File Contains SIMU Records | 1     | Report       |
| PLAT301_ALERT_3_G | Main Residue Disorder .....(Resd 1 )             | 20%   | Note         |
| PLAT413_ALERT_2_G | Short Inter XH3 .. XHn H17A ..H29D .             | 1.93  | Ang.         |
|                   | -1/2+x,1/2-y,-1/2+z =                            | 4_565 | Check        |
| PLAT720_ALERT_4_G | Number of Unusual/Non-Standard Labels .....      | 1     | Note         |
| PLAT860_ALERT_3_G | Number of Least-Squares Restraints .....         | 157   | Note         |
| PLAT941_ALERT_3_G | Average HKL Measurement Multiplicity .....       | 3.2   | Low          |
| PLAT978_ALERT_2_G | Number C-C Bonds with Positive Residual Density. | 0     | Info         |

---

0 **ALERT level A** = Most likely a serious problem - resolve or explain  
0 **ALERT level B** = A potentially serious problem, consider carefully  
4 **ALERT level C** = Check. Ensure it is not caused by an omission or oversight  
14 **ALERT level G** = General information/check it is not something unexpected

1 ALERT type 1 CIF construction/syntax error, inconsistent or missing data  
5 ALERT type 2 Indicator that the structure model may be wrong or deficient  
6 ALERT type 3 Indicator that the structure quality may be low  
5 ALERT type 4 Improvement, methodology, query or suggestion  
1 ALERT type 5 Informative message, check

---

---

It is advisable to attempt to resolve as many as possible of the alerts in all categories. Often the minor alerts point to easily fixed oversights, errors and omissions in your CIF or refinement strategy, so attention to these fine details can be worthwhile. In order to resolve some of the more serious problems it may be necessary to carry out additional measurements or structure refinements. However, the purpose of your study may justify the reported deviations and the more serious of these should normally be commented upon in the discussion or experimental section of a paper or in the "special\_details" fields of the CIF. checkCIF was carefully designed to identify outliers and unusual parameters, but every test has its limitations and alerts that are not important in a particular case may appear. Conversely, the absence of alerts does not guarantee there are no aspects of the results needing attention. It is up to the individual to critically assess their own results and, if necessary, seek expert advice.

### **Publication of your CIF in IUCr journals**

A basic structural check has been run on your CIF. These basic checks will be run on all CIFs submitted for publication in IUCr journals (*Acta Crystallographica*, *Journal of Applied Crystallography*, *Journal of Synchrotron Radiation*); however, if you intend to submit to *Acta Crystallographica Section C* or *E* or *IUCrData*, you should make sure that full publication checks are run on the final version of your CIF prior to submission.

### **Publication of your CIF in other journals**

Please refer to the *Notes for Authors* of the relevant journal for any special instructions relating to CIF submission.

---

**PLATON version of 22/04/2020; check.def file version of 09/03/2020**

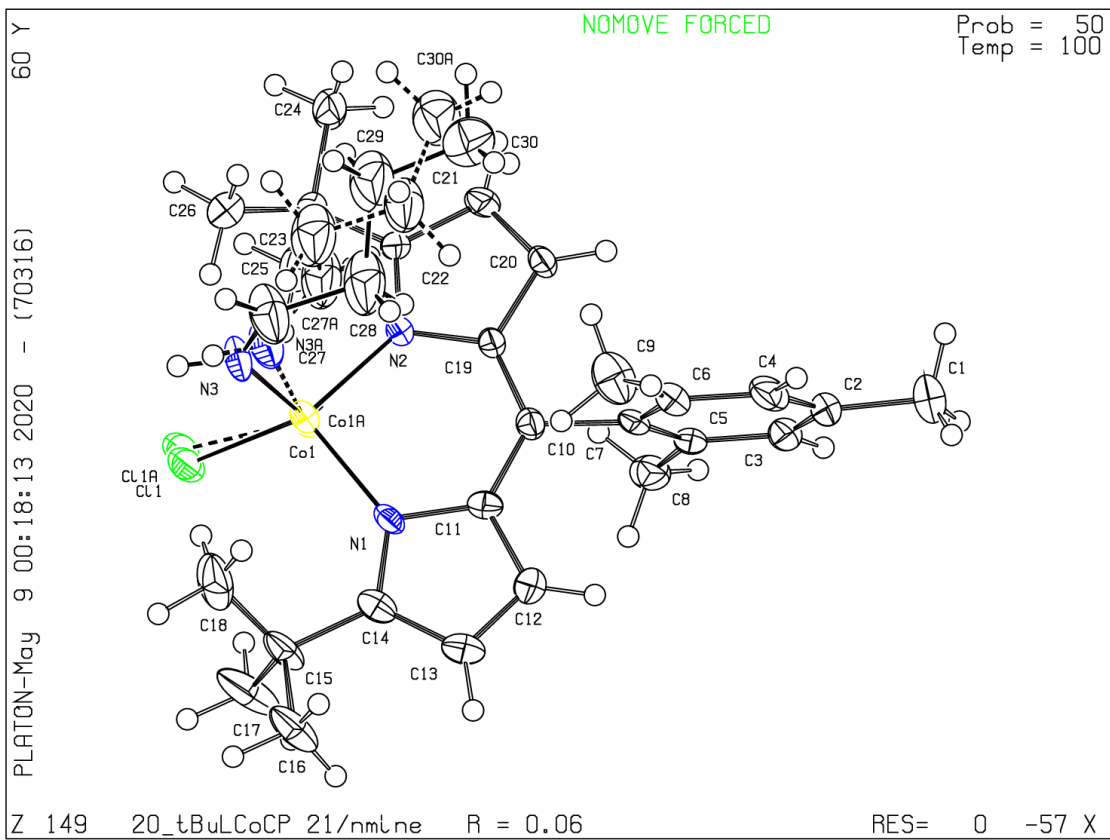

# checkCIF/PLATON report

Structure factors have been supplied for datablock(s) 21\_tBuLCoClnBuNH2

THIS REPORT IS FOR GUIDANCE ONLY. IF USED AS PART OF A REVIEW PROCEDURE FOR PUBLICATION, IT SHOULD NOT REPLACE THE EXPERTISE OF AN EXPERIENCED CRYSTALLOGRAPHIC REFEREE.

No syntax errors found.      CIF dictionary      Interpreting this report

## Datablock: 21\_tBuLCoClnBuNH2

---

|                 |                                                   |                    |
|-----------------|---------------------------------------------------|--------------------|
| Bond precision: | C-C = 0.0038 A                                    | Wavelength=0.71073 |
| Cell:           | a=13.8661(8)      b=13.8215(9)      c=16.3606(10) |                    |
|                 | alpha=90      beta=111.490(2)      gamma=90       |                    |
| Temperature:    | 100 K                                             |                    |
|                 | Calculated                                        | Reported           |
| Volume          | 2917.5(3)                                         | 2917.5(3)          |
| Space group     | P 21/n                                            | P 21/n             |
| Hall group      | -P 2yn                                            | -P 2yn             |
| Moiety formula  | C30 H44 Cl Co N3                                  | C30H44ClCoN3       |
| Sum formula     | C30 H44 Cl Co N3                                  | C30 H44 Cl Co N3   |
| Mr              | 541.06                                            | 541.06             |
| Dx,g cm-3       | 1.232                                             | 1.232              |
| Z               | 4                                                 | 4                  |
| Mu (mm-1)       | 0.702                                             | 0.702              |
| F000            | 1156.0                                            | 1156.0             |
| F000'           | 1158.26                                           |                    |
| h,k,lmax        | 16,16,19                                          | 16,16,19           |
| Nref            | 5208                                              | 5194               |
| Tmin,Tmax       | 0.777,0.932                                       | 0.670,0.745        |
| Tmin'           | 0.704                                             |                    |

Correction method= # Reported T Limits: Tmin=0.670 Tmax=0.745  
AbsCorr = MULTI-SCAN

Data completeness= 0.997      Theta(max)= 25.100

R(reflections)= 0.0442( 4011)      wR2(reflections)= 0.0810( 5194)

S = 1.083      Npar= 373

---

The following ALERTS were generated. Each ALERT has the format  
**test-name\_ALERT\_alert-type\_alert-level.**  
Click on the hyperlinks for more details of the test.

---

● **Alert level C**

|                   |                                                 |       |              |
|-------------------|-------------------------------------------------|-------|--------------|
| PLAT220_ALERT_2_C | Non-Solvent Resd 1 C Ueq(max)/Ueq(min) Range    | 3.2   | Ratio        |
| PLAT420_ALERT_2_C | D-H Without Acceptor N3 --H3B .                 |       | Please Check |
| PLAT906_ALERT_3_C | Large K Value in the Analysis of Variance ..... | 3.909 | Check        |
| PLAT911_ALERT_3_C | Missing FCF Refl Between Thmin & STh/L= 0.597   |       | 11 Report    |

---

● **Alert level G**

|                   |                                                  |     |              |
|-------------------|--------------------------------------------------|-----|--------------|
| PLAT002_ALERT_2_G | Number of Distance or Angle Restraints on AtSite | 11  | Note         |
| PLAT003_ALERT_2_G | Number of Uiso or Uij Restrained non-H Atoms ... | 10  | Report       |
| PLAT007_ALERT_5_G | Number of Unrefined Donor-H Atoms .....          | 4   | Report       |
| PLAT042_ALERT_1_G | Calc. and Reported MoietyFormula Strings Differ  |     | Please Check |
| PLAT175_ALERT_4_G | The CIF-Embedded .res File Contains SAME Records | 1   | Report       |
| PLAT176_ALERT_4_G | The CIF-Embedded .res File Contains SADI Records | 1   | Report       |
| PLAT178_ALERT_4_G | The CIF-Embedded .res File Contains SIMU Records | 1   | Report       |
| PLAT301_ALERT_3_G | Main Residue Disorder .....(Resd 1 )             | 14% | Note         |
| PLAT720_ALERT_4_G | Number of Unusual/Non-Standard Labels .....      | 2   | Note         |
| PLAT860_ALERT_3_G | Number of Least-Squares Restraints .....         | 128 | Note         |
| PLAT909_ALERT_3_G | Percentage of I>2sig(I) Data at Theta(Max) Still | 52% | Note         |
| PLAT910_ALERT_3_G | Missing # of FCF Reflection(s) Below Theta(Min). | 3   | Note         |
| PLAT978_ALERT_2_G | Number C-C Bonds with Positive Residual Density. | 5   | Info         |

---

0 **ALERT level A** = Most likely a serious problem - resolve or explain  
0 **ALERT level B** = A potentially serious problem, consider carefully  
4 **ALERT level C** = Check. Ensure it is not caused by an omission or oversight  
13 **ALERT level G** = General information/check it is not something unexpected

1 ALERT type 1 CIF construction/syntax error, inconsistent or missing data  
5 ALERT type 2 Indicator that the structure model may be wrong or deficient  
6 ALERT type 3 Indicator that the structure quality may be low  
4 ALERT type 4 Improvement, methodology, query or suggestion  
1 ALERT type 5 Informative message, check

---

It is advisable to attempt to resolve as many as possible of the alerts in all categories. Often the minor alerts point to easily fixed oversights, errors and omissions in your CIF or refinement strategy, so attention to these fine details can be worthwhile. In order to resolve some of the more serious problems it may be necessary to carry out additional measurements or structure refinements. However, the purpose of your study may justify the reported deviations and the more serious of these should normally be commented upon in the discussion or experimental section of a paper or in the "special\_details" fields of the CIF. checkCIF was carefully designed to identify outliers and unusual parameters, but every test has its limitations and alerts that are not important in a particular case may appear. Conversely, the absence of alerts does not guarantee there are no aspects of the results needing attention. It is up to the individual to critically assess their own results and, if necessary, seek expert advice.

### **Publication of your CIF in IUCr journals**

A basic structural check has been run on your CIF. These basic checks will be run on all CIFs submitted for publication in IUCr journals (*Acta Crystallographica*, *Journal of Applied Crystallography*, *Journal of Synchrotron Radiation*); however, if you intend to submit to *Acta Crystallographica Section C* or *E* or *IUCrData*, you should make sure that full publication checks are run on the final version of your CIF prior to submission.

### **Publication of your CIF in other journals**

Please refer to the *Notes for Authors* of the relevant journal for any special instructions relating to CIF submission.

---

**PLATON version of 07/08/2019; check.def file version of 30/07/2019**

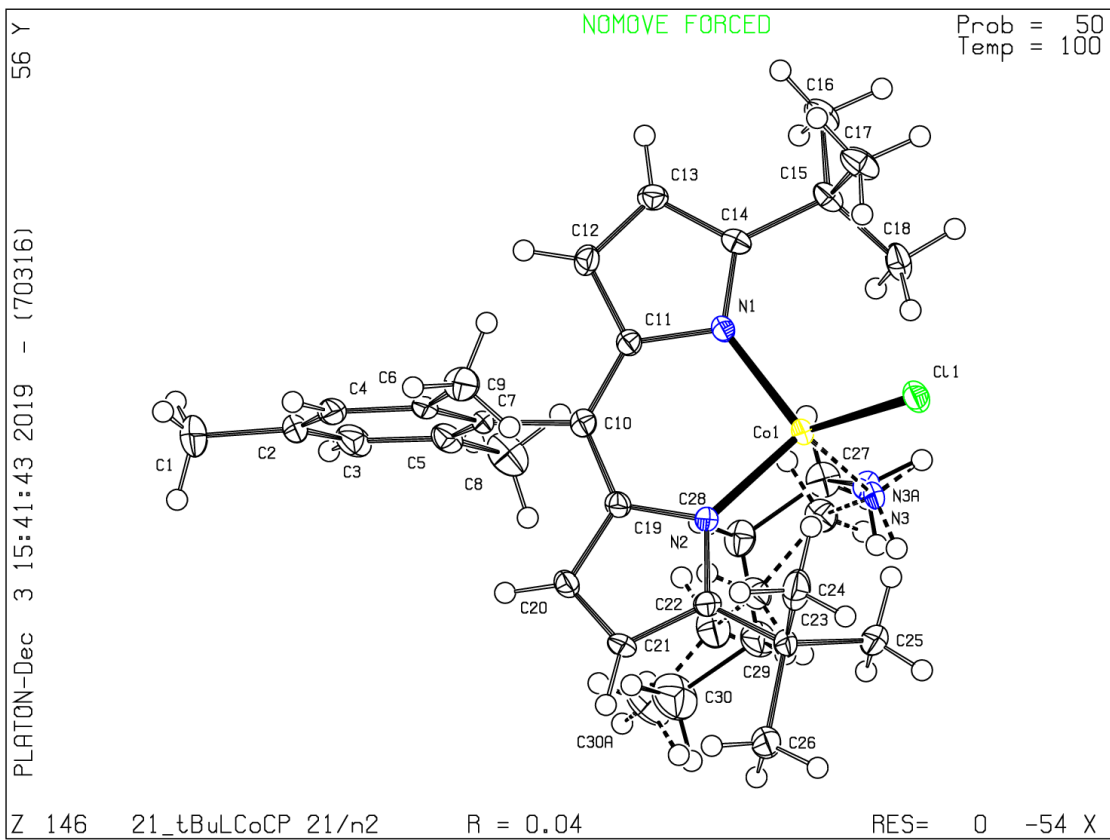

# checkCIF/PLATON report

Structure factors have been supplied for datablock(s) 8-heat1

THIS REPORT IS FOR GUIDANCE ONLY. IF USED AS PART OF A REVIEW PROCEDURE FOR PUBLICATION, IT SHOULD NOT REPLACE THE EXPERTISE OF AN EXPERIENCED CRYSTALLOGRAPHIC REFEREE.

No syntax errors found.      CIF dictionary      Interpreting this report

## Datablock: 8-heat1

---

Bond precision:    C-C = 0.0061 A                      Wavelength=0.71073

Cell:                      a=11.4915(6)      b=21.4912(11)      c=25.2006(13)  
                            alpha=90              beta=99.2162(15)      gamma=90

Temperature:      100 K

|                | Calculated                     | Reported                 |
|----------------|--------------------------------|--------------------------|
| Volume         | 6143.4(6)                      | 6143.4(6)                |
| Space group    | P 21/c                         | P 21/c                   |
| Hall group     | -P 2ybc                        | -P 2ybc                  |
| Moiety formula | 2(C72 H62 Br Co N4.68), C6 H14 | 2(C72H62BrCoN4.68),C6H14 |
| Sum formula    | C150 H138 Br2 Co2 N9.36        | C75 H69 Br Co N4.68      |
| Mr             | 2349.40                        | 1174.70                  |
| Dx,g cm-3      | 1.270                          | 1.270                    |
| Z              | 2                              | 4                        |
| Mu (mm-1)      | 0.977                          | 0.977                    |
| F000           | 2455.0                         | 2455.0                   |
| F000'          | 2456.00                        |                          |
| h,k,lmax       | 13,25,30                       | 13,25,30                 |
| Nref           | 10906                          | 10868                    |
| Tmin,Tmax      | 0.748,0.855                    | 0.706,0.801              |
| Tmin'          | 0.684                          |                          |

Correction method= # Reported T Limits: Tmin=0.706 Tmax=0.801  
AbsCorr = MULTI-SCAN

Data completeness= 0.997                      Theta(max)= 25.066

R(reflections)= 0.0571( 7371)              wR2(reflections)= 0.1622( 10868)

S = 1.008                      Npar= 801

---

The following ALERTS were generated. Each ALERT has the format

**test-name\_ALERT\_alert-type\_alert-level.**

Click on the hyperlinks for more details of the test.



---

### ● Alert level C

|                   |                                                  |              |
|-------------------|--------------------------------------------------|--------------|
| PLAT077_ALERT_4_C | Unitcell Contains Non-integer Number of Atoms .. | Please Check |
| PLAT220_ALERT_2_C | Non-Solvent Resd 1 C Ueq(max)/Ueq(min) Range     | 3.1 Ratio    |
| PLAT221_ALERT_2_C | Solv./Anion Resd 2 C Ueq(max)/Ueq(min) Range     | 4.6 Ratio    |
| PLAT223_ALERT_4_C | Solv./Anion Resd 2 H Ueq(max)/Ueq(min) Range     | 5.8 Ratio    |
| PLAT234_ALERT_4_C | Large Hirshfeld Difference C26 --C27             | 0.17 Ang.    |
| PLAT250_ALERT_2_C | Large U3/U1 Ratio for Average U(i,j) Tensor .... | 3.9 Note     |
| PLAT260_ALERT_2_C | Large Average Ueq of Residue Including C1S       | 0.184 Check  |
| PLAT341_ALERT_3_C | Low Bond Precision on C-C Bonds .....            | 0.00605 Ang. |
| PLAT411_ALERT_2_C | Short Inter H...H Contact H17 ..H17              | 2.12 Ang.    |
|                   | 1-x,1-y,1-z =                                    | 3_666 Check  |
| PLAT413_ALERT_2_C | Short Inter XH3 .. XHn H26 ..H65B                | 2.14 Ang.    |
|                   | 1+x,y,z =                                        | 1_655 Check  |
| PLAT906_ALERT_3_C | Large K Value in the Analysis of Variance .....  | 2.826 Check  |
| PLAT911_ALERT_3_C | Missing FCF Refl Between Thmin & STh/L= 0.596    | 35 Report    |
| PLAT978_ALERT_2_C | Number C-C Bonds with Positive Residual Density. | 0 Info       |

---

### ● Alert level G

FORMU01\_ALERT\_1\_G There is a discrepancy between the atom counts in the  
\_chemical\_formula\_sum and \_chemical\_formula\_moiety. This is  
usually due to the moiety formula being in the wrong format.  
Atom count from \_chemical\_formula\_sum: C75 H69 Br1 Cl N4.68  
Atom count from \_chemical\_formula\_moiety:C150 H138 Br2 Co2 N9.36

|                   |                                                  |              |
|-------------------|--------------------------------------------------|--------------|
| PLAT002_ALERT_2_G | Number of Distance or Angle Restraints on AtSite | 20 Note      |
| PLAT003_ALERT_2_G | Number of Uiso or Uij Restrained non-H Atoms ... | 6 Report     |
| PLAT042_ALERT_1_G | Calc. and Reported MoietyFormula Strings Differ  | Please Check |
| PLAT045_ALERT_1_G | Calculated and Reported Z Differ by a Factor ... | 0.50 Check   |
| PLAT083_ALERT_2_G | SHELXL Second Parameter in WGHT Unusually Large  | 11.75 Why ?  |
| PLAT171_ALERT_4_G | The CIF-Embedded .res File Contains EADP Records | 9 Report     |
| PLAT172_ALERT_4_G | The CIF-Embedded .res File Contains DFIX Records | 1 Report     |
| PLAT175_ALERT_4_G | The CIF-Embedded .res File Contains SAME Records | 2 Report     |
| PLAT176_ALERT_4_G | The CIF-Embedded .res File Contains SADI Records | 2 Report     |
| PLAT178_ALERT_4_G | The CIF-Embedded .res File Contains SIMU Records | 1 Report     |
| PLAT187_ALERT_4_G | The CIF-Embedded .res File Contains RIGU Records | 1 Report     |
| PLAT230_ALERT_2_G | Hirshfeld Test Diff for N3 --N4                  | 6.3 s.u.     |
| PLAT300_ALERT_4_G | Atom Site Occupancy of C1S Constrained at        | 0.5 Check    |
| PLAT300_ALERT_4_G | Atom Site Occupancy of C2S Constrained at        | 0.5 Check    |
| PLAT300_ALERT_4_G | Atom Site Occupancy of C3S Constrained at        | 0.5 Check    |
| PLAT300_ALERT_4_G | Atom Site Occupancy of C4S Constrained at        | 0.5 Check    |
| PLAT300_ALERT_4_G | Atom Site Occupancy of C5S Constrained at        | 0.5 Check    |
| PLAT300_ALERT_4_G | Atom Site Occupancy of C6S Constrained at        | 0.5 Check    |
| PLAT300_ALERT_4_G | Atom Site Occupancy of H1SA Constrained at       | 0.5 Check    |
| PLAT300_ALERT_4_G | Atom Site Occupancy of H1SB Constrained at       | 0.5 Check    |
| PLAT300_ALERT_4_G | Atom Site Occupancy of H1SC Constrained at       | 0.5 Check    |
| PLAT300_ALERT_4_G | Atom Site Occupancy of H2SA Constrained at       | 0.5 Check    |
| PLAT300_ALERT_4_G | Atom Site Occupancy of H2SB Constrained at       | 0.5 Check    |
| PLAT300_ALERT_4_G | Atom Site Occupancy of H3SA Constrained at       | 0.5 Check    |
| PLAT300_ALERT_4_G | Atom Site Occupancy of H3SB Constrained at       | 0.5 Check    |
| PLAT300_ALERT_4_G | Atom Site Occupancy of H4SA Constrained at       | 0.5 Check    |
| PLAT300_ALERT_4_G | Atom Site Occupancy of H4SB Constrained at       | 0.5 Check    |
| PLAT300_ALERT_4_G | Atom Site Occupancy of H5SA Constrained at       | 0.5 Check    |
| PLAT300_ALERT_4_G | Atom Site Occupancy of H5SB Constrained at       | 0.5 Check    |
| PLAT300_ALERT_4_G | Atom Site Occupancy of H6SA Constrained at       | 0.5 Check    |
| PLAT300_ALERT_4_G | Atom Site Occupancy of H6SB Constrained at       | 0.5 Check    |
| PLAT300_ALERT_4_G | Atom Site Occupancy of H6SC Constrained at       | 0.5 Check    |
| PLAT301_ALERT_3_G | Main Residue Disorder .....(Resd 1 )             | 14% Note     |
| PLAT302_ALERT_4_G | Anion/Solvent/Minor-Residue Disorder (Resd 2 )   | 100% Note    |
| PLAT304_ALERT_4_G | Non-Integer Number of Atoms in ..... Resd 1      | 140.68 Check |
| PLAT411_ALERT_2_G | Short Inter H...H Contact H2SB ..H28             | 2.06 Ang.    |
|                   | 1-x,-1/2+y,3/2-z =                               | 2_646 Check  |

|                   |                                                  |      |                   |   |             |
|-------------------|--------------------------------------------------|------|-------------------|---|-------------|
| PLAT413_ALERT_2_G | Short Inter XH3 .. XHn                           | H14  | ..H75D            | . | 1.89 Ang.   |
|                   |                                                  |      | -x,1-y,1-z =      |   | 3_566 Check |
| PLAT413_ALERT_2_G | Short Inter XH3 .. XHn                           | H44  | ..H75F            | . | 1.63 Ang.   |
|                   |                                                  |      | 1+x,1/2-y,1/2+z = |   | 4_666 Check |
| PLAT413_ALERT_2_G | Short Inter XH3 .. XHn                           | H1SB | ..H27             | . | 1.49 Ang.   |
|                   |                                                  |      | x,1/2-y,-1/2+z =  |   | 4_565 Check |
| PLAT432_ALERT_2_G | Short Inter X...Y Contact                        | C13  | ..C75B            |   | 2.99 Ang.   |
|                   |                                                  |      | -x,1-y,1-z =      |   | 3_566 Check |
| PLAT432_ALERT_2_G | Short Inter X...Y Contact                        | C14  | ..C75B            |   | 2.62 Ang.   |
|                   |                                                  |      | -x,1-y,1-z =      |   | 3_566 Check |
| PLAT432_ALERT_2_G | Short Inter X...Y Contact                        | C15  | ..C75B            |   | 3.13 Ang.   |
|                   |                                                  |      | -x,1-y,1-z =      |   | 3_566 Check |
| PLAT432_ALERT_2_G | Short Inter X...Y Contact                        | C44  | ..C75B            |   | 2.94 Ang.   |
|                   |                                                  |      | 1+x,1/2-y,1/2+z = |   | 4_666 Check |
| PLAT720_ALERT_4_G | Number of Unusual/Non-Standard Labels .....      |      |                   |   | 14 Note     |
| PLAT789_ALERT_4_G | Atoms with Negative _atom_site_disorder_group #  |      |                   |   | 20 Check    |
| PLAT860_ALERT_3_G | Number of Least-Squares Restraints .....         |      |                   |   | 79 Note     |
| PLAT909_ALERT_3_G | Percentage of I>2sig(I) Data at Theta(Max) Still |      |                   |   | 38% Note    |
| PLAT910_ALERT_3_G | Missing # of FCF Reflection(s) Below Theta(Min). |      |                   |   | 3 Note      |
| PLAT933_ALERT_2_G | Number of OMIT Records in Embedded .res File ... |      |                   |   | 6 Note      |

---

0 **ALERT level A** = Most likely a serious problem - resolve or explain  
 0 **ALERT level B** = A potentially serious problem, consider carefully  
 13 **ALERT level C** = Check. Ensure it is not caused by an omission or oversight  
 50 **ALERT level G** = General information/check it is not something unexpected

3 ALERT type 1 CIF construction/syntax error, inconsistent or missing data  
 20 ALERT type 2 Indicator that the structure model may be wrong or deficient  
 7 ALERT type 3 Indicator that the structure quality may be low  
 33 ALERT type 4 Improvement, methodology, query or suggestion  
 0 ALERT type 5 Informative message, check

---

It is advisable to attempt to resolve as many as possible of the alerts in all categories. Often the minor alerts point to easily fixed oversights, errors and omissions in your CIF or refinement strategy, so attention to these fine details can be worthwhile. In order to resolve some of the more serious problems it may be necessary to carry out additional measurements or structure refinements. However, the purpose of your study may justify the reported deviations and the more serious of these should normally be commented upon in the discussion or experimental section of a paper or in the "special\_details" fields of the CIF. checkCIF was carefully designed to identify outliers and unusual parameters, but every test has its limitations and alerts that are not important in a particular case may appear. Conversely, the absence of alerts does not guarantee there are no aspects of the results needing attention. It is up to the individual to critically assess their own results and, if necessary, seek expert advice.

### **Publication of your CIF in IUCr journals**

A basic structural check has been run on your CIF. These basic checks will be run on all CIFs submitted for publication in IUCr journals (*Acta Crystallographica*, *Journal of Applied Crystallography*, *Journal of Synchrotron Radiation*); however, if you intend to submit to *Acta Crystallographica Section C* or *E* or *IUCrData*, you should make sure that full publication checks are run on the final version of your CIF prior to submission.

### **Publication of your CIF in other journals**

Please refer to the *Notes for Authors* of the relevant journal for any special instructions relating to CIF submission.

---

**PLATON version of 07/08/2019; check.def file version of 30/07/2019**

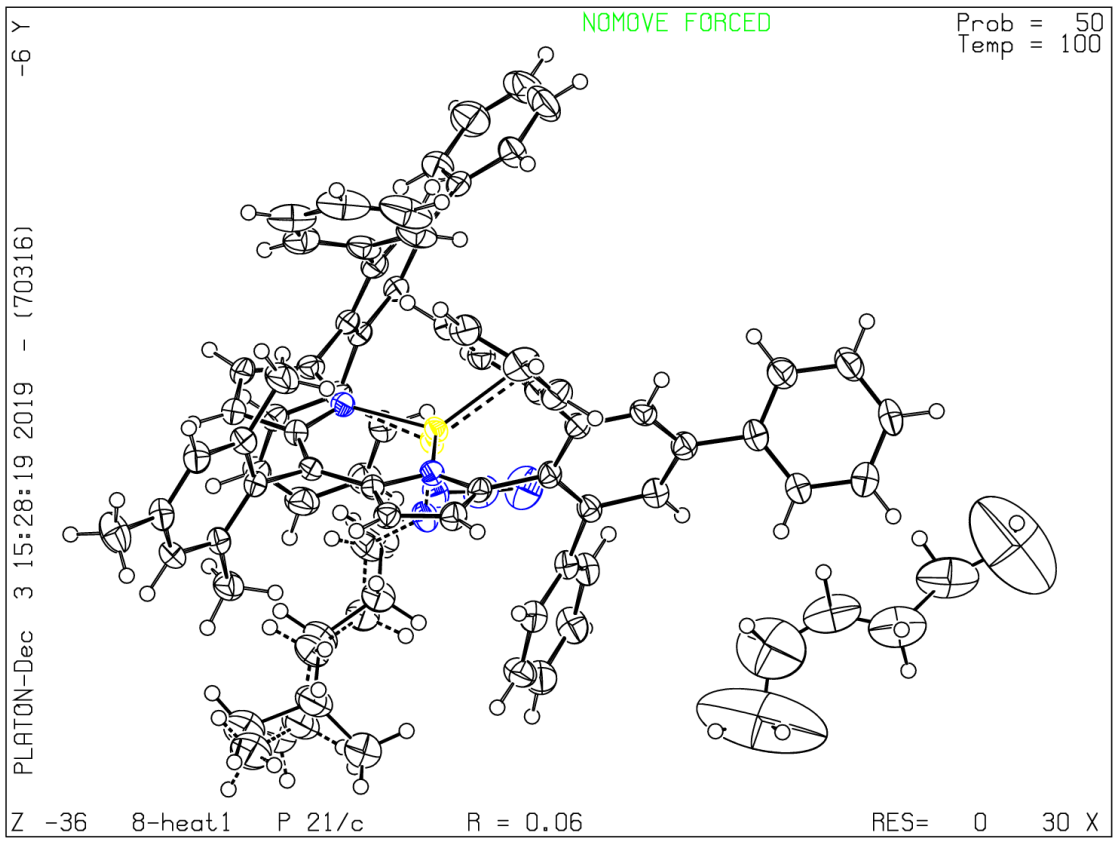

# checkCIF/PLATON report

Structure factors have been supplied for datablock(s) 8-heat2

THIS REPORT IS FOR GUIDANCE ONLY. IF USED AS PART OF A REVIEW PROCEDURE FOR PUBLICATION, IT SHOULD NOT REPLACE THE EXPERTISE OF AN EXPERIENCED CRYSTALLOGRAPHIC REFEREE.

No syntax errors found.      CIF dictionary      Interpreting this report

## Datablock: 8-heat2

---

Bond precision:    C-C = 0.0062 A                      Wavelength=0.71073

Cell:                      a=11.4909(6)      b=21.4788(12)      c=25.2005(14)  
                            alpha=90              beta=99.2321(16)      gamma=90

Temperature:      100 K

|                | Calculated                     | Reported                 |
|----------------|--------------------------------|--------------------------|
| Volume         | 6139.2(6)                      | 6139.2(6)                |
| Space group    | P 21/c                         | P 21/c                   |
| Hall group     | -P 2ybc                        | -P 2ybc                  |
| Moiety formula | 2(C72 H62 Br Co N4.66), C6 H14 | 2(C72H62BrCoN4.66),C6H14 |
| Sum formula    | C150 H138 Br2 Co2 N9.32        | C75 H69 Br Co N4.66      |
| Mr             | 2348.79                        | 1174.42                  |
| Dx,g cm-3      | 1.271                          | 1.271                    |
| Z              | 2                              | 4                        |
| Mu (mm-1)      | 0.978                          | 0.978                    |
| F000           | 2454.4                         | 2454.0                   |
| F000'          | 2455.38                        |                          |
| h,k,lmax       | 13,25,30                       | 13,25,30                 |
| Nref           | 10922                          | 10882                    |
| Tmin,Tmax      | 0.747,0.855                    | 0.678,0.801              |
| Tmin'          | 0.684                          |                          |

Correction method= # Reported T Limits: Tmin=0.678 Tmax=0.801  
AbsCorr = MULTI-SCAN

Data completeness= 0.996                      Theta(max)= 25.087

R(reflections)= 0.0580( 7428)              wR2(reflections)= 0.1662( 10882)

S = 1.040                      Npar= 801

---

The following ALERTS were generated. Each ALERT has the format  
**test-name\_ALERT\_alert-type\_alert-level.**  
Click on the hyperlinks for more details of the test.

---

### ● Alert level C

|                   |                                                  |              |
|-------------------|--------------------------------------------------|--------------|
| PLAT077_ALERT_4_C | Unitcell Contains Non-integer Number of Atoms .. | Please Check |
| PLAT221_ALERT_2_C | Solv./Anion Resd 2 C Ueq(max)/Ueq(min) Range     | 4.6 Ratio    |
| PLAT223_ALERT_4_C | Solv./Anion Resd 2 H Ueq(max)/Ueq(min) Range     | 5.7 Ratio    |
| PLAT234_ALERT_4_C | Large Hirshfeld Difference C26 --C27 .           | 0.17 Ang.    |
| PLAT234_ALERT_4_C | Large Hirshfeld Difference C73 --C74 .           | 0.17 Ang.    |
| PLAT250_ALERT_2_C | Large U3/U1 Ratio for Average U(i,j) Tensor .... | 3.8 Note     |
| PLAT260_ALERT_2_C | Large Average Ueq of Residue Including C1S       | 0.188 Check  |
| PLAT341_ALERT_3_C | Low Bond Precision on C-C Bonds .....            | 0.00622 Ang. |
| PLAT411_ALERT_2_C | Short Inter H...H Contact H17 ..H17 .            | 2.11 Ang.    |
|                   | 1-x,1-y,1-z =                                    | 3_666 Check  |
| PLAT906_ALERT_3_C | Large K Value in the Analysis of Variance .....  | 2.876 Check  |
| PLAT911_ALERT_3_C | Missing FCF Refl Between Thmin & STh/L= 0.597    | 37 Report    |
| PLAT978_ALERT_2_C | Number C-C Bonds with Positive Residual Density. | 0 Info       |

---

### ● Alert level G

FORMU01\_ALERT\_1\_G There is a discrepancy between the atom counts in the  
\_chemical\_formula\_sum and \_chemical\_formula\_moiety. This is  
usually due to the moiety formula being in the wrong format.  
Atom count from \_chemical\_formula\_sum: C75 H69 Br1 Co1 N4.66  
Atom count from \_chemical\_formula\_moiety:C150 H138 Br2 Co2 N9.32

|                   |                                                  |              |
|-------------------|--------------------------------------------------|--------------|
| PLAT002_ALERT_2_G | Number of Distance or Angle Restraints on AtSite | 20 Note      |
| PLAT003_ALERT_2_G | Number of Uiso or Uij Restrained non-H Atoms ... | 6 Report     |
| PLAT042_ALERT_1_G | Calc. and Reported MoietyFormula Strings Differ  | Please Check |
| PLAT045_ALERT_1_G | Calculated and Reported Z Differ by a Factor ... | 0.50 Check   |
| PLAT068_ALERT_1_G | Reported F000 Differs from Calcd (or Missing)... | Please Check |
| PLAT083_ALERT_2_G | SHELXL Second Parameter in WGHT Unusually Large  | 11.75 Why ?  |
| PLAT171_ALERT_4_G | The CIF-Embedded .res File Contains EADP Records | 9 Report     |
| PLAT172_ALERT_4_G | The CIF-Embedded .res File Contains DFIX Records | 1 Report     |
| PLAT175_ALERT_4_G | The CIF-Embedded .res File Contains SAME Records | 2 Report     |
| PLAT176_ALERT_4_G | The CIF-Embedded .res File Contains SADI Records | 2 Report     |
| PLAT178_ALERT_4_G | The CIF-Embedded .res File Contains SIMU Records | 1 Report     |
| PLAT187_ALERT_4_G | The CIF-Embedded .res File Contains RIGU Records | 1 Report     |
| PLAT230_ALERT_2_G | Hirshfeld Test Diff for N3 --N4 .                | 9.8 s.u.     |
| PLAT300_ALERT_4_G | Atom Site Occupancy of C1S Constrained at        | 0.5 Check    |
| PLAT300_ALERT_4_G | Atom Site Occupancy of C2S Constrained at        | 0.5 Check    |
| PLAT300_ALERT_4_G | Atom Site Occupancy of C3S Constrained at        | 0.5 Check    |
| PLAT300_ALERT_4_G | Atom Site Occupancy of C4S Constrained at        | 0.5 Check    |
| PLAT300_ALERT_4_G | Atom Site Occupancy of C5S Constrained at        | 0.5 Check    |
| PLAT300_ALERT_4_G | Atom Site Occupancy of C6S Constrained at        | 0.5 Check    |
| PLAT300_ALERT_4_G | Atom Site Occupancy of H1SA Constrained at       | 0.5 Check    |
| PLAT300_ALERT_4_G | Atom Site Occupancy of H1SB Constrained at       | 0.5 Check    |
| PLAT300_ALERT_4_G | Atom Site Occupancy of H1SC Constrained at       | 0.5 Check    |
| PLAT300_ALERT_4_G | Atom Site Occupancy of H2SA Constrained at       | 0.5 Check    |
| PLAT300_ALERT_4_G | Atom Site Occupancy of H2SB Constrained at       | 0.5 Check    |
| PLAT300_ALERT_4_G | Atom Site Occupancy of H3SA Constrained at       | 0.5 Check    |
| PLAT300_ALERT_4_G | Atom Site Occupancy of H3SB Constrained at       | 0.5 Check    |
| PLAT300_ALERT_4_G | Atom Site Occupancy of H4SA Constrained at       | 0.5 Check    |
| PLAT300_ALERT_4_G | Atom Site Occupancy of H4SB Constrained at       | 0.5 Check    |
| PLAT300_ALERT_4_G | Atom Site Occupancy of H5SA Constrained at       | 0.5 Check    |
| PLAT300_ALERT_4_G | Atom Site Occupancy of H5SB Constrained at       | 0.5 Check    |
| PLAT300_ALERT_4_G | Atom Site Occupancy of H6SA Constrained at       | 0.5 Check    |
| PLAT300_ALERT_4_G | Atom Site Occupancy of H6SB Constrained at       | 0.5 Check    |
| PLAT300_ALERT_4_G | Atom Site Occupancy of H6SC Constrained at       | 0.5 Check    |
| PLAT301_ALERT_3_G | Main Residue Disorder .....(Resd 1 )             | 14% Note     |
| PLAT302_ALERT_4_G | Anion/Solvent/Minor-Residue Disorder (Resd 2 )   | 100% Note    |
| PLAT304_ALERT_4_G | Non-Integer Number of Atoms in ..... Resd 1      | 140.66 Check |
| PLAT411_ALERT_2_G | Short Inter H...H Contact H2SB ..H28 .           | 2.05 Ang.    |
|                   | 1-x,-1/2+y,3/2-z =                               | 2_646 Check  |
| PLAT413_ALERT_2_G | Short Inter XH3 .. XHn H14 ..H75D .              | 1.87 Ang.    |

|                   |                                                  |                   |       |       |
|-------------------|--------------------------------------------------|-------------------|-------|-------|
|                   |                                                  | -x,1-y,1-z =      | 3_566 | Check |
| PLAT413_ALERT_2_G | Short Inter XH3 .. XHn                           | H21 ..H75D        | 1.99  | Ang.  |
|                   |                                                  | 1-x,1-y,1-z =     | 3_666 | Check |
| PLAT413_ALERT_2_G | Short Inter XH3 .. XHn                           | H21 ..H75F        | 1.89  | Ang.  |
|                   |                                                  | 1-x,1-y,1-z =     | 3_666 | Check |
| PLAT413_ALERT_2_G | Short Inter XH3 .. XHn                           | H44 ..H75E        | 2.04  | Ang.  |
|                   |                                                  | 1+x,1/2-y,1/2+z = | 4_666 | Check |
| PLAT413_ALERT_2_G | Short Inter XH3 .. XHn                           | H1SB ..H27        | 1.53  | Ang.  |
|                   |                                                  | x,1/2-y,-1/2+z =  | 4_565 | Check |
| PLAT432_ALERT_2_G | Short Inter X...Y Contact                        | C13 ..C75B        | 2.95  | Ang.  |
|                   |                                                  | -x,1-y,1-z =      | 3_566 | Check |
| PLAT432_ALERT_2_G | Short Inter X...Y Contact                        | C14 ..C75B        | 2.59  | Ang.  |
|                   |                                                  | -x,1-y,1-z =      | 3_566 | Check |
| PLAT432_ALERT_2_G | Short Inter X...Y Contact                        | C21 ..C75B        | 3.01  | Ang.  |
|                   |                                                  | 1-x,1-y,1-z =     | 3_666 | Check |
| PLAT432_ALERT_2_G | Short Inter X...Y Contact                        | C44 ..C75B        | 3.02  | Ang.  |
|                   |                                                  | 1+x,1/2-y,1/2+z = | 4_666 | Check |
| PLAT720_ALERT_4_G | Number of Unusual/Non-Standard Labels .....      |                   | 14    | Note  |
| PLAT789_ALERT_4_G | Atoms with Negative _atom_site_disorder_group #  |                   | 20    | Check |
| PLAT860_ALERT_3_G | Number of Least-Squares Restraints .....         |                   | 79    | Note  |
| PLAT909_ALERT_3_G | Percentage of I>2sig(I) Data at Theta(Max) Still |                   | 38%   | Note  |
| PLAT910_ALERT_3_G | Missing # of FCF Reflection(s) Below Theta(Min). |                   | 3     | Note  |
| PLAT933_ALERT_2_G | Number of OMIT Records in Embedded .res File ... |                   | 6     | Note  |

---

0 **ALERT level A** = Most likely a serious problem - resolve or explain  
 0 **ALERT level B** = A potentially serious problem, consider carefully  
 12 **ALERT level C** = Check. Ensure it is not caused by an omission or oversight  
 53 **ALERT level G** = General information/check it is not something unexpected

4 **ALERT type 1** CIF construction/syntax error, inconsistent or missing data  
 20 **ALERT type 2** Indicator that the structure model may be wrong or deficient  
 7 **ALERT type 3** Indicator that the structure quality may be low  
 34 **ALERT type 4** Improvement, methodology, query or suggestion  
 0 **ALERT type 5** Informative message, check

---

It is advisable to attempt to resolve as many as possible of the alerts in all categories. Often the minor alerts point to easily fixed oversights, errors and omissions in your CIF or refinement strategy, so attention to these fine details can be worthwhile. In order to resolve some of the more serious problems it may be necessary to carry out additional measurements or structure refinements. However, the purpose of your study may justify the reported deviations and the more serious of these should normally be commented upon in the discussion or experimental section of a paper or in the "special\_details" fields of the CIF. checkCIF was carefully designed to identify outliers and unusual parameters, but every test has its limitations and alerts that are not important in a particular case may appear. Conversely, the absence of alerts does not guarantee there are no aspects of the results needing attention. It is up to the individual to critically assess their own results and, if necessary, seek expert advice.

### **Publication of your CIF in IUCr journals**

A basic structural check has been run on your CIF. These basic checks will be run on all CIFs submitted for publication in IUCr journals (*Acta Crystallographica*, *Journal of Applied Crystallography*, *Journal of Synchrotron Radiation*); however, if you intend to submit to *Acta Crystallographica Section C* or *E* or *IUCrData*, you should make sure that full publication checks are run on the final version of your CIF prior to submission.

### **Publication of your CIF in other journals**

Please refer to the *Notes for Authors* of the relevant journal for any special instructions relating to CIF submission.

---

**PLATON version of 07/08/2019; check.def file version of 30/07/2019**



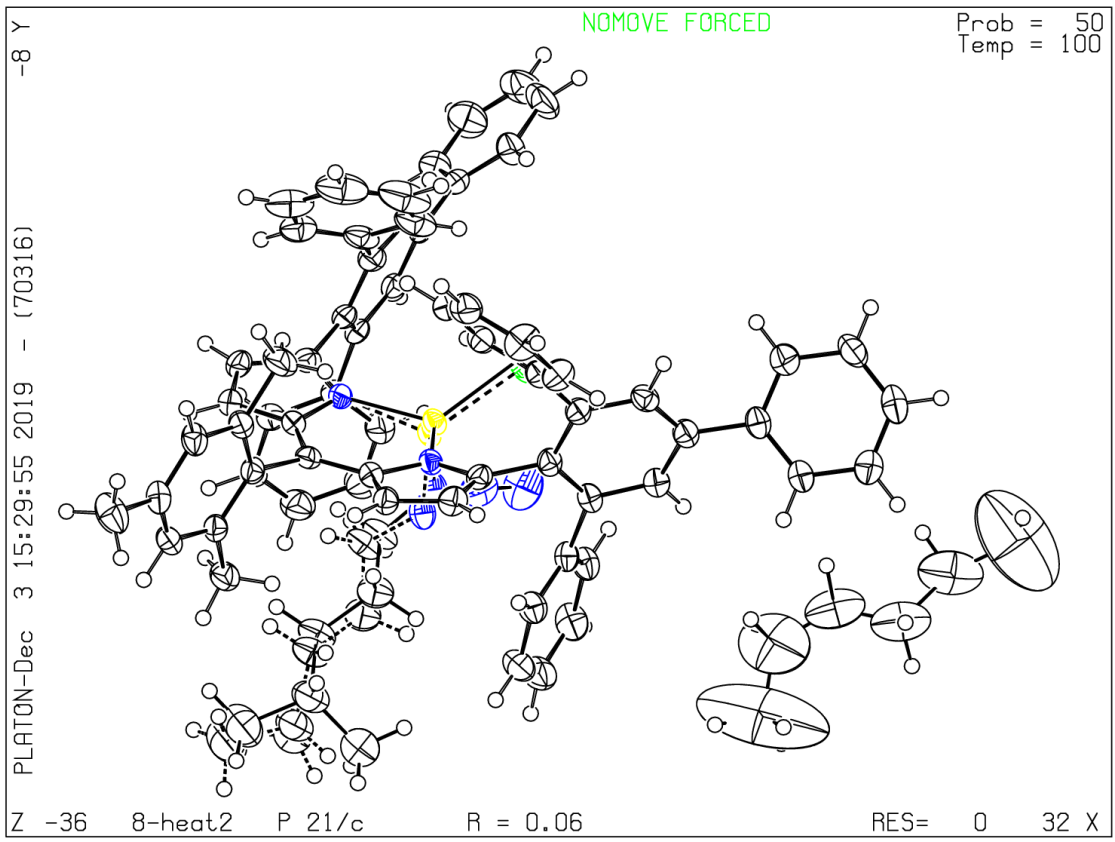

# checkCIF/PLATON report

Structure factors have been supplied for datablock(s) 8-heat3

THIS REPORT IS FOR GUIDANCE ONLY. IF USED AS PART OF A REVIEW PROCEDURE FOR PUBLICATION, IT SHOULD NOT REPLACE THE EXPERTISE OF AN EXPERIENCED CRYSTALLOGRAPHIC REFEREE.

No syntax errors found.      CIF dictionary      Interpreting this report

## Datablock: 8-heat3

---

Bond precision:    C-C = 0.0067 A                      Wavelength=0.71073

Cell:                      a=11.4836(7)              b=21.4653(12)              c=25.2099(14)  
                                    alpha=90                      beta=99.2360(17)              gamma=90  
Temperature:              100 K

|                | Calculated                             | Reported                   |
|----------------|----------------------------------------|----------------------------|
| Volume         | 6133.7(6)                              | 6133.6(6)                  |
| Space group    | P 21/c                                 | P 21/c                     |
| Hall group     | -P 2ybc                                | -P 2ybc                    |
| Moiety formula | C72 H62 Br Co<br>N4.62, 0.5(C6<br>H14) | C72H62BrCoN4.62,0.5(C6H14) |
| Sum formula    | C75 H69 Br Co<br>N4.62                 | C75 H69 Br Co N4.62        |
| Mr             | 1173.92                                | 1173.90                    |
| Dx,g cm-3      | 1.271                                  | 1.271                      |
| Z              | 4                                      | 4                          |
| Mu (mm-1)      | 0.979                                  | 0.979                      |
| F000           | 2453.5                                 | 2453.0                     |
| F000'          | 2454.43                                |                            |
| h,k,lmax       | 13,25,30                               | 13,25,30                   |
| Nref           | 10952                                  | 10892                      |
| Tmin,Tmax      | 0.747,0.855                            | 0.666,0.801                |
| Tmin'          | 0.683                                  |                            |

Correction method= # Reported T Limits: Tmin=0.666 Tmax=0.801  
AbsCorr = MULTI-SCAN

Data completeness= 0.995                      Theta(max)= 25.120

R(reflections)= 0.0637( 7459)              wR2(reflections)= 0.1778( 10892)

S = 1.106                      Npar= 801

The following ALERTS were generated. Each ALERT has the format

**test-name\_ALERT\_alert-type\_alert-level.**

Click on the hyperlinks for more details of the test.

### ● Alert level C

|                   |                                                  |              |
|-------------------|--------------------------------------------------|--------------|
| PLAT077_ALERT_4_C | Unitcell Contains Non-integer Number of Atoms .. | Please Check |
| PLAT220_ALERT_2_C | Non-Solvent Resd 1 C Ueq(max)/Ueq(min) Range     | 3.3 Ratio    |
| PLAT223_ALERT_4_C | Solv./Anion Resd 2 H Ueq(max)/Ueq(min) Range     | 5.0 Ratio    |
| PLAT234_ALERT_4_C | Large Hirshfeld Difference C26 --C27 .           | 0.17 Ang.    |
| PLAT234_ALERT_4_C | Large Hirshfeld Difference C74 --C76 .           | 0.18 Ang.    |
| PLAT250_ALERT_2_C | Large U3/U1 Ratio for Average U(i,j) Tensor .... | 3.0 Note     |
| PLAT260_ALERT_2_C | Large Average Ueq of Residue Including C1S       | 0.179 Check  |
| PLAT341_ALERT_3_C | Low Bond Precision on C-C Bonds .....            | 0.00673 Ang. |
| PLAT411_ALERT_2_C | Short Inter H...H Contact H17 ..H17 .            | 2.12 Ang.    |
|                   | 1-x,1-y,1-z =                                    | 3_666 Check  |
| PLAT413_ALERT_2_C | Short Inter XH3 .. XHn H26 ..H65B .              | 2.14 Ang.    |
|                   | 1+x,y,z =                                        | 1_655 Check  |
| PLAT906_ALERT_3_C | Large K Value in the Analysis of Variance .....  | 3.734 Check  |
| PLAT911_ALERT_3_C | Missing FCF Refl Between Thmin & STh/L= 0.597    | 56 Report    |

### ● Alert level G

|                   |                                                  |                     |
|-------------------|--------------------------------------------------|---------------------|
| PLAT002_ALERT_2_G | Number of Distance or Angle Restraints on AtSite | 20 Note             |
| PLAT003_ALERT_2_G | Number of Uiso or Uij Restrained non-H Atoms ... | 6 Report            |
| PLAT042_ALERT_1_G | Calc. and Reported MoietyFormula Strings Differ  | Please Check        |
| PLAT068_ALERT_1_G | Reported F000 Differs from Calcd (or Missing)... | Please Check        |
| PLAT083_ALERT_2_G | SHELXL Second Parameter in WGHT Unusually Large  | 11.75 Why ?         |
| PLAT171_ALERT_4_G | The CIF-Embedded .res File Contains EADP Records | 9 Report            |
| PLAT172_ALERT_4_G | The CIF-Embedded .res File Contains DFIX Records | 1 Report            |
| PLAT175_ALERT_4_G | The CIF-Embedded .res File Contains SAME Records | 2 Report            |
| PLAT176_ALERT_4_G | The CIF-Embedded .res File Contains SADI Records | 2 Report            |
| PLAT178_ALERT_4_G | The CIF-Embedded .res File Contains SIMU Records | 1 Report            |
| PLAT187_ALERT_4_G | The CIF-Embedded .res File Contains RIGU Records | 1 Report            |
| PLAT230_ALERT_2_G | Hirshfeld Test Diff for N3 --N4 .                | 10.2 s.u.           |
| PLAT300_ALERT_4_G | Atom Site Occupancy of C1S Constrained at        | 0.5 Check           |
| PLAT300_ALERT_4_G | Atom Site Occupancy of C2S Constrained at        | 0.5 Check           |
| PLAT300_ALERT_4_G | Atom Site Occupancy of C3S Constrained at        | 0.5 Check           |
| PLAT300_ALERT_4_G | Atom Site Occupancy of C4S Constrained at        | 0.5 Check           |
| PLAT300_ALERT_4_G | Atom Site Occupancy of C5S Constrained at        | 0.5 Check           |
| PLAT300_ALERT_4_G | Atom Site Occupancy of C6S Constrained at        | 0.5 Check           |
| PLAT300_ALERT_4_G | Atom Site Occupancy of H1SA Constrained at       | 0.5 Check           |
| PLAT300_ALERT_4_G | Atom Site Occupancy of H1SB Constrained at       | 0.5 Check           |
| PLAT300_ALERT_4_G | Atom Site Occupancy of H1SC Constrained at       | 0.5 Check           |
| PLAT300_ALERT_4_G | Atom Site Occupancy of H2SA Constrained at       | 0.5 Check           |
| PLAT300_ALERT_4_G | Atom Site Occupancy of H2SB Constrained at       | 0.5 Check           |
| PLAT300_ALERT_4_G | Atom Site Occupancy of H3SA Constrained at       | 0.5 Check           |
| PLAT300_ALERT_4_G | Atom Site Occupancy of H3SB Constrained at       | 0.5 Check           |
| PLAT300_ALERT_4_G | Atom Site Occupancy of H4SA Constrained at       | 0.5 Check           |
| PLAT300_ALERT_4_G | Atom Site Occupancy of H4SB Constrained at       | 0.5 Check           |
| PLAT300_ALERT_4_G | Atom Site Occupancy of H5SA Constrained at       | 0.5 Check           |
| PLAT300_ALERT_4_G | Atom Site Occupancy of H5SB Constrained at       | 0.5 Check           |
| PLAT300_ALERT_4_G | Atom Site Occupancy of H6SA Constrained at       | 0.5 Check           |
| PLAT300_ALERT_4_G | Atom Site Occupancy of H6SB Constrained at       | 0.5 Check           |
| PLAT300_ALERT_4_G | Atom Site Occupancy of H6SC Constrained at       | 0.5 Check           |
| PLAT301_ALERT_3_G | Main Residue Disorder .....(Resd 1 )             | 14% Note            |
| PLAT302_ALERT_4_G | Anion/Solvent/Minor-Residue Disorder (Resd 2 )   | 100% Note           |
| PLAT304_ALERT_4_G | Non-Integer Number of Atoms in .....             | Resd 1 140.62 Check |
| PLAT411_ALERT_2_G | Short Inter H...H Contact H2SB ..H28 .           | 2.03 Ang.           |
|                   | 1-x,-1/2+y,3/2-z =                               | 2_646 Check         |

|                   |                                                  |                    |       |           |
|-------------------|--------------------------------------------------|--------------------|-------|-----------|
| PLAT413_ALERT_2_G | Short Inter XH3 .. XHn                           | H21 ..H75D         | .     | 1.75 Ang. |
|                   |                                                  | 1-x,1-y,1-z =      | 3_666 | Check     |
| PLAT413_ALERT_2_G | Short Inter XH3 .. XHn                           | H44 ..H75E         | .     | 1.74 Ang. |
|                   |                                                  | 1+x,1/2-y,1/2+z =  | 4_666 | Check     |
| PLAT413_ALERT_2_G | Short Inter XH3 .. XHn                           | H44 ..H75F         | .     | 1.73 Ang. |
|                   |                                                  | 1+x,1/2-y,1/2+z =  | 4_666 | Check     |
| PLAT413_ALERT_2_G | Short Inter XH3 .. XHn                           | H1SB ..H27         | .     | 2.07 Ang. |
|                   |                                                  | x,1/2-y,-1/2+z =   | 4_565 | Check     |
| PLAT413_ALERT_2_G | Short Inter XH3 .. XHn                           | H1SC ..H27         | .     | 2.14 Ang. |
|                   |                                                  | 1-x,-1/2+y,3/2-z = | 2_646 | Check     |
| PLAT432_ALERT_2_G | Short Inter X...Y Contact                        | C14 ..C75B         | .     | 3.11 Ang. |
|                   |                                                  | -x,1-y,1-z =       | 3_566 | Check     |
| PLAT432_ALERT_2_G | Short Inter X...Y Contact                        | C44 ..C75B         | .     | 2.63 Ang. |
|                   |                                                  | 1+x,1/2-y,1/2+z =  | 4_666 | Check     |
| PLAT720_ALERT_4_G | Number of Unusual/Non-Standard Labels .....      |                    |       | 14 Note   |
| PLAT789_ALERT_4_G | Atoms with Negative _atom_site_disorder_group #  |                    |       | 20 Check  |
| PLAT860_ALERT_3_G | Number of Least-Squares Restraints .....         |                    |       | 79 Note   |
| PLAT909_ALERT_3_G | Percentage of I>2sig(I) Data at Theta(Max) Still |                    |       | 38% Note  |
| PLAT910_ALERT_3_G | Missing # of FCF Reflection(s) Below Theta(Min). |                    |       | 3 Note    |
| PLAT933_ALERT_2_G | Number of OMIT Records in Embedded .res File ... |                    |       | 6 Note    |
| PLAT978_ALERT_2_G | Number C-C Bonds with Positive Residual Density. |                    |       | 1 Info    |

---

0 **ALERT level A** = Most likely a serious problem - resolve or explain  
 0 **ALERT level B** = A potentially serious problem, consider carefully  
 12 **ALERT level C** = Check. Ensure it is not caused by an omission or oversight  
 50 **ALERT level G** = General information/check it is not something unexpected

2 ALERT type 1 CIF construction/syntax error, inconsistent or missing data  
 19 ALERT type 2 Indicator that the structure model may be wrong or deficient  
 7 ALERT type 3 Indicator that the structure quality may be low  
 34 ALERT type 4 Improvement, methodology, query or suggestion  
 0 ALERT type 5 Informative message, check

---

It is advisable to attempt to resolve as many as possible of the alerts in all categories. Often the minor alerts point to easily fixed oversights, errors and omissions in your CIF or refinement strategy, so attention to these fine details can be worthwhile. In order to resolve some of the more serious problems it may be necessary to carry out additional measurements or structure refinements. However, the purpose of your study may justify the reported deviations and the more serious of these should normally be commented upon in the discussion or experimental section of a paper or in the "special\_details" fields of the CIF. checkCIF was carefully designed to identify outliers and unusual parameters, but every test has its limitations and alerts that are not important in a particular case may appear. Conversely, the absence of alerts does not guarantee there are no aspects of the results needing attention. It is up to the individual to critically assess their own results and, if necessary, seek expert advice.

### **Publication of your CIF in IUCr journals**

A basic structural check has been run on your CIF. These basic checks will be run on all CIFs submitted for publication in IUCr journals (*Acta Crystallographica*, *Journal of Applied Crystallography*, *Journal of Synchrotron Radiation*); however, if you intend to submit to *Acta Crystallographica Section C* or *E* or *IUCrData*, you should make sure that full publication checks are run on the final version of your CIF prior to submission.

### **Publication of your CIF in other journals**

Please refer to the *Notes for Authors* of the relevant journal for any special instructions relating to CIF submission.

---

**PLATON version of 07/08/2019; check.def file version of 30/07/2019**

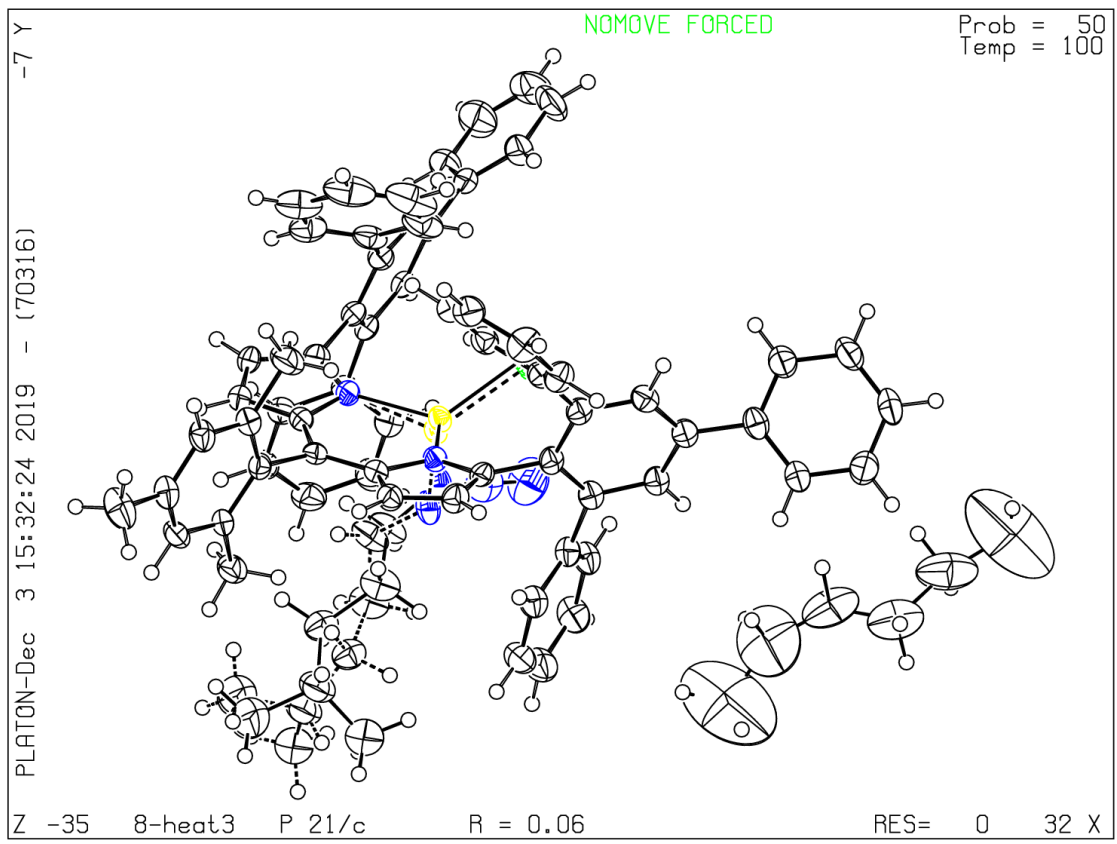

# checkCIF/PLATON report

Structure factors have been supplied for datablock(s) 8-heat4

THIS REPORT IS FOR GUIDANCE ONLY. IF USED AS PART OF A REVIEW PROCEDURE FOR PUBLICATION, IT SHOULD NOT REPLACE THE EXPERTISE OF AN EXPERIENCED CRYSTALLOGRAPHIC REFEREE.

No syntax errors found.      CIF dictionary      Interpreting this report

## Datablock: 8-heat4

---

|                 |                                                    |                                              |
|-----------------|----------------------------------------------------|----------------------------------------------|
| Bond precision: | C-C = 0.0074 A                                     | Wavelength=0.71073                           |
| Cell:           | a=11.4804(7)      b=21.4571(13)      c=25.2287(15) | alpha=90      beta=99.2593(17)      gamma=90 |
| Temperature:    | 100 K                                              |                                              |
|                 | Calculated                                         | Reported                                     |
| Volume          | 6133.8(6)                                          | 6133.8(6)                                    |
| Space group     | P 21/c                                             | P 21/c                                       |
| Hall group      | -P 2ybc                                            | -P 2ybc                                      |
| Moiety formula  | C72 H62 Br Co N4.60,<br>0.5(C6 H14)                | C72H62BrCoN4.59 0.5(C6H14)                   |
| Sum formula     | C75 H69 Br Co N4.60                                | C75 H69 Br Co N4.59                          |
| Mr              | 1173.53                                            | 1173.51                                      |
| Dx,g cm-3       | 1.271                                              | 1.271                                        |
| Z               | 4                                                  | 4                                            |
| Mu (mm-1)       | 0.979                                              | 0.979                                        |
| F000            | 2452.7                                             | 2453.0                                       |
| F000'           | 2453.64                                            |                                              |
| h,k,lmax        | 13,25,30                                           | 13,25,30                                     |
| Nref            | 10919                                              | 10876                                        |
| Tmin,Tmax       | 0.747,0.855                                        | 0.702,0.859                                  |
| Tmin'           | 0.683                                              |                                              |

Correction method= # Reported T Limits: Tmin=0.702 Tmax=0.859  
AbsCorr = MULTI-SCAN

Data completeness= 0.996      Theta(max)= 25.095

R(reflections)= 0.0747( 7301)      wR2(reflections)= 0.1915( 10876)

S = 1.165      Npar= 801

---

The following ALERTS were generated. Each ALERT has the format

**test-name\_ALERT\_alert-type\_alert-level.**

Click on the hyperlinks for more details of the test.

---

### ● Alert level C

|                   |                                                  |                         |              |
|-------------------|--------------------------------------------------|-------------------------|--------------|
| PLAT041_ALERT_1_C | Calc. and Reported SumFormula                    | Strings Differ          | Please Check |
| PLAT077_ALERT_4_C | Unitcell Contains Non-integer Number of Atoms    | ..                      | Please Check |
| PLAT220_ALERT_2_C | Non-Solvent Resd 1 C                             | Ueq(max)/Ueq(min) Range | 3.8 Ratio    |
| PLAT220_ALERT_2_C | Non-Solvent Resd 1 N                             | Ueq(max)/Ueq(min) Range | 3.4 Ratio    |
| PLAT223_ALERT_4_C | Solv./Anion Resd 2 H                             | Ueq(max)/Ueq(min) Range | 4.3 Ratio    |
| PLAT234_ALERT_4_C | Large Hirshfeld Difference C74                   | --C76                   | 0.19 Ang.    |
| PLAT250_ALERT_2_C | Large U3/U1 Ratio for Average U(i,j) Tensor      | ....                    | 3.7 Note     |
| PLAT260_ALERT_2_C | Large Average Ueq of Residue Including           | C1S                     | 0.188 Check  |
| PLAT341_ALERT_3_C | Low Bond Precision on C-C Bonds                  | .....                   | 0.00742 Ang. |
| PLAT411_ALERT_2_C | Short Inter H...H Contact H17                    | ..H17                   | 2.10 Ang.    |
|                   |                                                  | 1-x,1-y,1-z =           | 3_666 Check  |
| PLAT906_ALERT_3_C | Large K Value in the Analysis of Variance        | .....                   | 7.008 Check  |
| PLAT906_ALERT_3_C | Large K Value in the Analysis of Variance        | .....                   | 2.295 Check  |
| PLAT911_ALERT_3_C | Missing FCF Refl Between Thmin & STh/L=          | 0.597                   | 41 Report    |
| PLAT977_ALERT_2_C | Check Negative Difference Density on H71C        |                         | -0.32 eA-3   |
| PLAT978_ALERT_2_C | Number C-C Bonds with Positive Residual Density. |                         | 0 Info       |

---

### ● Alert level G

FORMU01\_ALERT\_1\_G There is a discrepancy between the atom counts in the  
\_chemical\_formula\_sum and \_chemical\_formula\_moiety. This is  
usually due to the moiety formula being in the wrong format.  
Atom count from \_chemical\_formula\_sum: C75 H69 Br1 Cl1 N4.59  
Atom count from \_chemical\_formula\_moiety:C78 H76 Br1 Cl1 N40590.50

|                   |                                                  |                 |              |
|-------------------|--------------------------------------------------|-----------------|--------------|
| PLAT002_ALERT_2_G | Number of Distance or Angle Restraints on AtSite |                 | 20 Note      |
| PLAT003_ALERT_2_G | Number of Uiso or Uij Restrained non-H Atoms     | ...             | 6 Report     |
| PLAT042_ALERT_1_G | Calc. and Reported MoietyFormula Strings Differ  |                 | Please Check |
| PLAT068_ALERT_1_G | Reported F000 Differs from Calcd (or Missing)... |                 | Please Check |
| PLAT083_ALERT_2_G | SHELXL Second Parameter in WGHT                  | Unusually Large | 11.75 Why ?  |
| PLAT171_ALERT_4_G | The CIF-Embedded .res File Contains EADP Records |                 | 9 Report     |
| PLAT172_ALERT_4_G | The CIF-Embedded .res File Contains DFIX Records |                 | 1 Report     |
| PLAT175_ALERT_4_G | The CIF-Embedded .res File Contains SAME Records |                 | 2 Report     |
| PLAT176_ALERT_4_G | The CIF-Embedded .res File Contains SADI Records |                 | 2 Report     |
| PLAT178_ALERT_4_G | The CIF-Embedded .res File Contains SIMU Records |                 | 1 Report     |
| PLAT186_ALERT_4_G | The CIF-Embedded .res File Contains ISOR Records |                 | 1 Report     |
| PLAT187_ALERT_4_G | The CIF-Embedded .res File Contains RIGU Records |                 | 1 Report     |
| PLAT230_ALERT_2_G | Hirshfeld Test Diff for N3                       | --N4            | 12.8 s.u.    |
| PLAT300_ALERT_4_G | Atom Site Occupancy of C1S                       | Constrained at  | 0.5 Check    |
| PLAT300_ALERT_4_G | Atom Site Occupancy of C2S                       | Constrained at  | 0.5 Check    |
| PLAT300_ALERT_4_G | Atom Site Occupancy of C3S                       | Constrained at  | 0.5 Check    |
| PLAT300_ALERT_4_G | Atom Site Occupancy of C4S                       | Constrained at  | 0.5 Check    |
| PLAT300_ALERT_4_G | Atom Site Occupancy of C5S                       | Constrained at  | 0.5 Check    |
| PLAT300_ALERT_4_G | Atom Site Occupancy of C6S                       | Constrained at  | 0.5 Check    |
| PLAT300_ALERT_4_G | Atom Site Occupancy of H1SA                      | Constrained at  | 0.5 Check    |
| PLAT300_ALERT_4_G | Atom Site Occupancy of H1SB                      | Constrained at  | 0.5 Check    |
| PLAT300_ALERT_4_G | Atom Site Occupancy of H1SC                      | Constrained at  | 0.5 Check    |
| PLAT300_ALERT_4_G | Atom Site Occupancy of H2SA                      | Constrained at  | 0.5 Check    |
| PLAT300_ALERT_4_G | Atom Site Occupancy of H2SB                      | Constrained at  | 0.5 Check    |
| PLAT300_ALERT_4_G | Atom Site Occupancy of H3SA                      | Constrained at  | 0.5 Check    |
| PLAT300_ALERT_4_G | Atom Site Occupancy of H3SB                      | Constrained at  | 0.5 Check    |
| PLAT300_ALERT_4_G | Atom Site Occupancy of H4SA                      | Constrained at  | 0.5 Check    |
| PLAT300_ALERT_4_G | Atom Site Occupancy of H4SB                      | Constrained at  | 0.5 Check    |
| PLAT300_ALERT_4_G | Atom Site Occupancy of H5SA                      | Constrained at  | 0.5 Check    |
| PLAT300_ALERT_4_G | Atom Site Occupancy of H5SB                      | Constrained at  | 0.5 Check    |
| PLAT300_ALERT_4_G | Atom Site Occupancy of H6SA                      | Constrained at  | 0.5 Check    |



|                   |                                                  |                      |        |       |
|-------------------|--------------------------------------------------|----------------------|--------|-------|
| PLAT300_ALERT_4_G | Atom Site Occupancy of H6SB                      | Constrained at       | 0.5    | Check |
| PLAT300_ALERT_4_G | Atom Site Occupancy of H6SC                      | Constrained at       | 0.5    | Check |
| PLAT301_ALERT_3_G | Main Residue Disorder .....                      | (Resd 1 )            | 13%    | Note  |
| PLAT302_ALERT_4_G | Anion/Solvent/Minor-Residue Disorder             | (Resd 2 )            | 100%   | Note  |
| PLAT304_ALERT_4_G | Non-Integer Number of Atoms in .....             | Resd 1               | 140.60 | Check |
| PLAT411_ALERT_2_G | Short Inter H...H Contact                        | H2SB ..H28 .         | 2.04   | Ang.  |
|                   |                                                  | $1-x,-1/2+y,3/2-z =$ | 2_646  | Check |
| PLAT413_ALERT_2_G | Short Inter XH3 .. XHn                           | H14 ..H75D .         | 1.75   | Ang.  |
|                   |                                                  | $-x,1-y,1-z =$       | 3_566  | Check |
| PLAT413_ALERT_2_G | Short Inter XH3 .. XHn                           | H44 ..H75F .         | 1.83   | Ang.  |
|                   |                                                  | $1+x,1/2-y,1/2+z =$  | 4_666  | Check |
| PLAT413_ALERT_2_G | Short Inter XH3 .. XHn                           | H1SB ..H27 .         | 1.57   | Ang.  |
|                   |                                                  | $x,1/2-y,-1/2+z =$   | 4_565  | Check |
| PLAT432_ALERT_2_G | Short Inter X...Y Contact                        | C13 ..C75B           | 2.85   | Ang.  |
|                   |                                                  | $-x,1-y,1-z =$       | 3_566  | Check |
| PLAT432_ALERT_2_G | Short Inter X...Y Contact                        | C14 ..C75B           | 2.47   | Ang.  |
|                   |                                                  | $-x,1-y,1-z =$       | 3_566  | Check |
| PLAT432_ALERT_2_G | Short Inter X...Y Contact                        | C15 ..C75B           | 3.08   | Ang.  |
|                   |                                                  | $-x,1-y,1-z =$       | 3_566  | Check |
| PLAT432_ALERT_2_G | Short Inter X...Y Contact                        | C44 ..C75B           | 3.01   | Ang.  |
|                   |                                                  | $1+x,1/2-y,1/2+z =$  | 4_666  | Check |
| PLAT720_ALERT_4_G | Number of Unusual/Non-Standard Labels .....      |                      | 14     | Note  |
| PLAT789_ALERT_4_G | Atoms with Negative _atom_site_disorder_group #  |                      | 20     | Check |
| PLAT860_ALERT_3_G | Number of Least-Squares Restraints .....         |                      | 115    | Note  |
| PLAT909_ALERT_3_G | Percentage of I>2sig(I) Data at Theta(Max) Still |                      | 39%    | Note  |
| PLAT910_ALERT_3_G | Missing # of FCF Reflection(s) Below Theta(Min). |                      | 3      | Note  |
| PLAT933_ALERT_2_G | Number of OMIT Records in Embedded .res File ... |                      | 6      | Note  |

---

0 **ALERT level A** = Most likely a serious problem - resolve or explain  
 0 **ALERT level B** = A potentially serious problem, consider carefully  
 15 **ALERT level C** = Check. Ensure it is not caused by an omission or oversight  
 51 **ALERT level G** = General information/check it is not something unexpected

4 ALERT type 1 CIF construction/syntax error, inconsistent or missing data  
 20 ALERT type 2 Indicator that the structure model may be wrong or deficient  
 8 ALERT type 3 Indicator that the structure quality may be low  
 34 ALERT type 4 Improvement, methodology, query or suggestion  
 0 ALERT type 5 Informative message, check

---

It is advisable to attempt to resolve as many as possible of the alerts in all categories. Often the minor alerts point to easily fixed oversights, errors and omissions in your CIF or refinement strategy, so attention to these fine details can be worthwhile. In order to resolve some of the more serious problems it may be necessary to carry out additional measurements or structure refinements. However, the purpose of your study may justify the reported deviations and the more serious of these should normally be commented upon in the discussion or experimental section of a paper or in the "special\_details" fields of the CIF. checkCIF was carefully designed to identify outliers and unusual parameters, but every test has its limitations and alerts that are not important in a particular case may appear. Conversely, the absence of alerts does not guarantee there are no aspects of the results needing attention. It is up to the individual to critically assess their own results and, if necessary, seek expert advice.

### **Publication of your CIF in IUCr journals**

A basic structural check has been run on your CIF. These basic checks will be run on all CIFs submitted for publication in IUCr journals (*Acta Crystallographica*, *Journal of Applied Crystallography*, *Journal of Synchrotron Radiation*); however, if you intend to submit to *Acta Crystallographica Section C* or *E* or *IUCrData*, you should make sure that full publication checks are run on the final version of your CIF prior to submission.

### **Publication of your CIF in other journals**

Please refer to the *Notes for Authors* of the relevant journal for any special instructions relating to CIF submission.

---

**PLATON version of 07/08/2019; check.def file version of 30/07/2019**

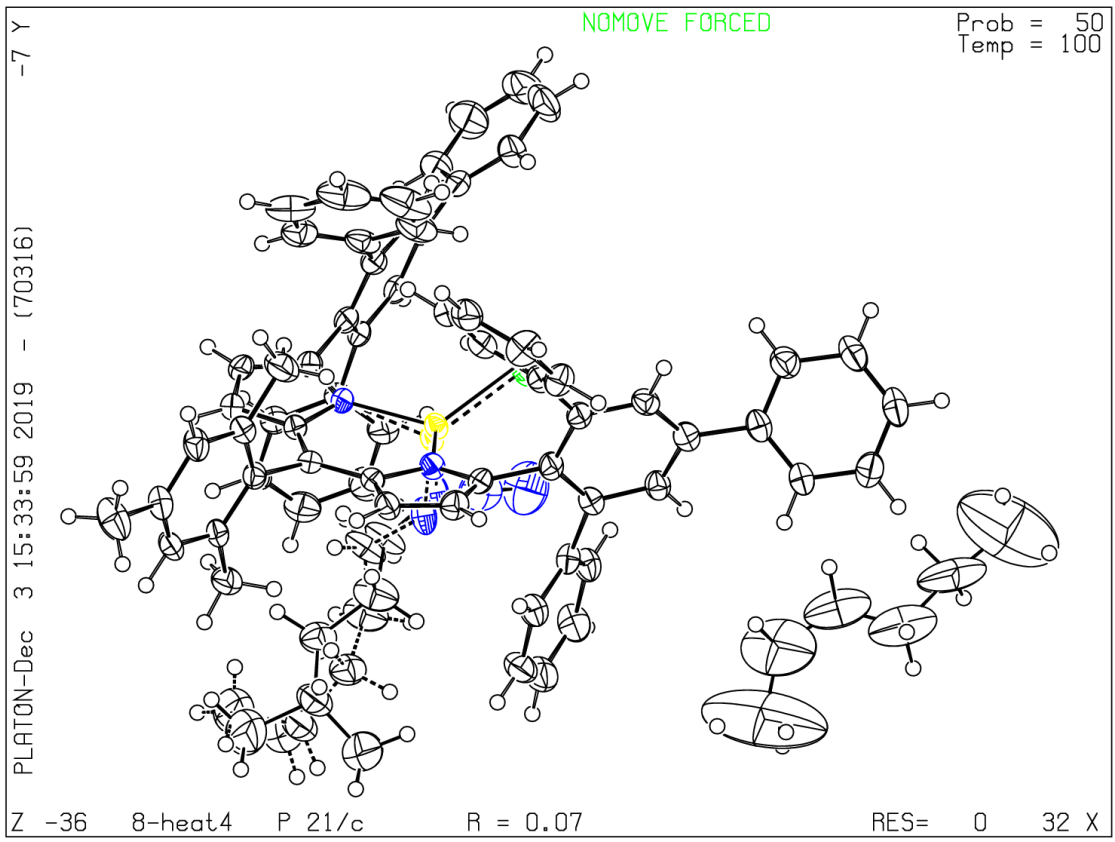

# checkCIF/PLATON report

You have not supplied any structure factors. As a result the full set of tests cannot be run.

THIS REPORT IS FOR GUIDANCE ONLY. IF USED AS PART OF A REVIEW PROCEDURE FOR PUBLICATION, IT SHOULD NOT REPLACE THE EXPERTISE OF AN EXPERIENCED CRYSTALLOGRAPHIC REFEREE.

No syntax errors found.      CIF dictionary      Interpreting this report

## Datablock: 7\_start

---

Bond precision:    C-C = 0.0088 A

Wavelength=0.41328

Cell:                a=11.725(3)                b=12.350(3)                c=22.789(5)  
                      alpha=87.920(4)        beta=89.927(13)        gamma=72.544(5)  
Temperature:        100 K

|                | Calculated                   | Reported                |
|----------------|------------------------------|-------------------------|
| Volume         | 3145.7(13)                   | 3145.7(13)              |
| Space group    | P -1                         | P -1                    |
| Hall group     | -P 1                         | -P 1                    |
| Moiety formula | C76 H62 Br Co N5, 0.5(C6 H6) | C76 H62 Br Co N5, C3 H3 |
| Sum formula    | C79 H65 Br Co N5             | C79 H65 Br Co N5        |
| Mr             | 1223.19                      | 1223.20                 |
| Dx, g cm-3     | 1.291                        | 1.291                   |
| Z              | 2                            | 2                       |
| Mu (mm-1)      | 0.234                        | 0.515                   |
| F000           | 1272.0                       | 1272.0                  |
| F000'          | 1272.78                      |                         |
| h,k,lmax       | 14,15,28                     | 14,15,28                |
| Nref           | 13592                        | 12428                   |
| Tmin,Tmax      |                              | 0.617,0.744             |
| Tmin'          |                              |                         |

Correction method= # Reported T Limits: Tmin=0.617 Tmax=0.744  
AbsCorr = MULTI-SCAN

Data completeness= 0.914

Theta(max)= 15.251

R(reflections)= 0.0863( 8871)

wR2(reflections)= 0.2485( 12428)

S = 1.049

Npar= 779

---

The following ALERTS were generated. Each ALERT has the format

**test-name\_ALERT\_alert-type\_alert-level.**

Click on the hyperlinks for more details of the test.

---

**Alert level A**

PLAT029\_ALERT\_3\_A \_diffrn\_measured\_fraction\_theta\_full value Low . 0.939 Why?

**Author Response: Data was collected at a synchrotron source as a series of phi scans and this is the completeness that was obtained by this acquisition sequence. The geometry of the experiment (cryostat, LED fiber optic, detector, and beam path) prevented acquisition of omega scans.**

---

**Alert level C**

RINTA01\_ALERT\_3\_C The value of Rint is greater than 0.12

Rint given 0.138

PLAT020\_ALERT\_3\_C The Value of Rint is Greater Than 0.12 ..... 0.138 Report

PLAT341\_ALERT\_3\_C Low Bond Precision on C-C Bonds ..... 0.0088 Ang.

---

**Alert level G**

ABSMU01\_ALERT\_1\_G Calculation of \_exptl\_absorpt\_correction\_mu  
not performed for this radiation type.

PLAT042\_ALERT\_1\_G Calc. and Reported MoietyFormula Strings Differ Please Check

PLAT083\_ALERT\_2\_G SHELXL Second Parameter in WGHT Unusually Large 14.35 Why ?

PLAT092\_ALERT\_4\_G Check: Wavelength Given is not Cu,Ga,Mo,Ag,In Ka 0.41328 Ang.

PLAT720\_ALERT\_4\_G Number of Unusual/Non-Standard Labels ..... 3 Note

PLAT883\_ALERT\_1\_G No Info/Value for \_atom\_sites\_solution\_primary . Please Do !

PLAT984\_ALERT\_1\_G The Br-f'= 0.2880 Deviates from the B&C-Value 0.2863 Check

PLAT985\_ALERT\_1\_G The Br-f"= 0.9627 Deviates from the B&C-Value 0.9639 Check

PLAT985\_ALERT\_1\_G The Co-f"= 0.3155 Deviates from the B&C-Value 0.3559 Check

- 
- 1 **ALERT level A** = Most likely a serious problem - resolve or explain  
0 **ALERT level B** = A potentially serious problem, consider carefully  
3 **ALERT level C** = Check. Ensure it is not caused by an omission or oversight  
9 **ALERT level G** = General information/check it is not something unexpected
- 6 ALERT type 1 CIF construction/syntax error, inconsistent or missing data  
1 ALERT type 2 Indicator that the structure model may be wrong or deficient  
4 ALERT type 3 Indicator that the structure quality may be low  
2 ALERT type 4 Improvement, methodology, query or suggestion  
0 ALERT type 5 Informative message, check
-

It is advisable to attempt to resolve as many as possible of the alerts in all categories. Often the minor alerts point to easily fixed oversights, errors and omissions in your CIF or refinement strategy, so attention to these fine details can be worthwhile. In order to resolve some of the more serious problems it may be necessary to carry out additional measurements or structure refinements. However, the purpose of your study may justify the reported deviations and the more serious of these should normally be commented upon in the discussion or experimental section of a paper or in the "special\_details" fields of the CIF. checkCIF was carefully designed to identify outliers and unusual parameters, but every test has its limitations and alerts that are not important in a particular case may appear. Conversely, the absence of alerts does not guarantee there are no aspects of the results needing attention. It is up to the individual to critically assess their own results and, if necessary, seek expert advice.

### **Publication of your CIF in IUCr journals**

A basic structural check has been run on your CIF. These basic checks will be run on all CIFs submitted for publication in IUCr journals (*Acta Crystallographica*, *Journal of Applied Crystallography*, *Journal of Synchrotron Radiation*); however, if you intend to submit to *Acta Crystallographica Section C* or *E* or *IUCrData*, you should make sure that full publication checks are run on the final version of your CIF prior to submission.

### **Publication of your CIF in other journals**

Please refer to the *Notes for Authors* of the relevant journal for any special instructions relating to CIF submission.

---

**PLATON version of 22/04/2020; check.def file version of 09/03/2020**

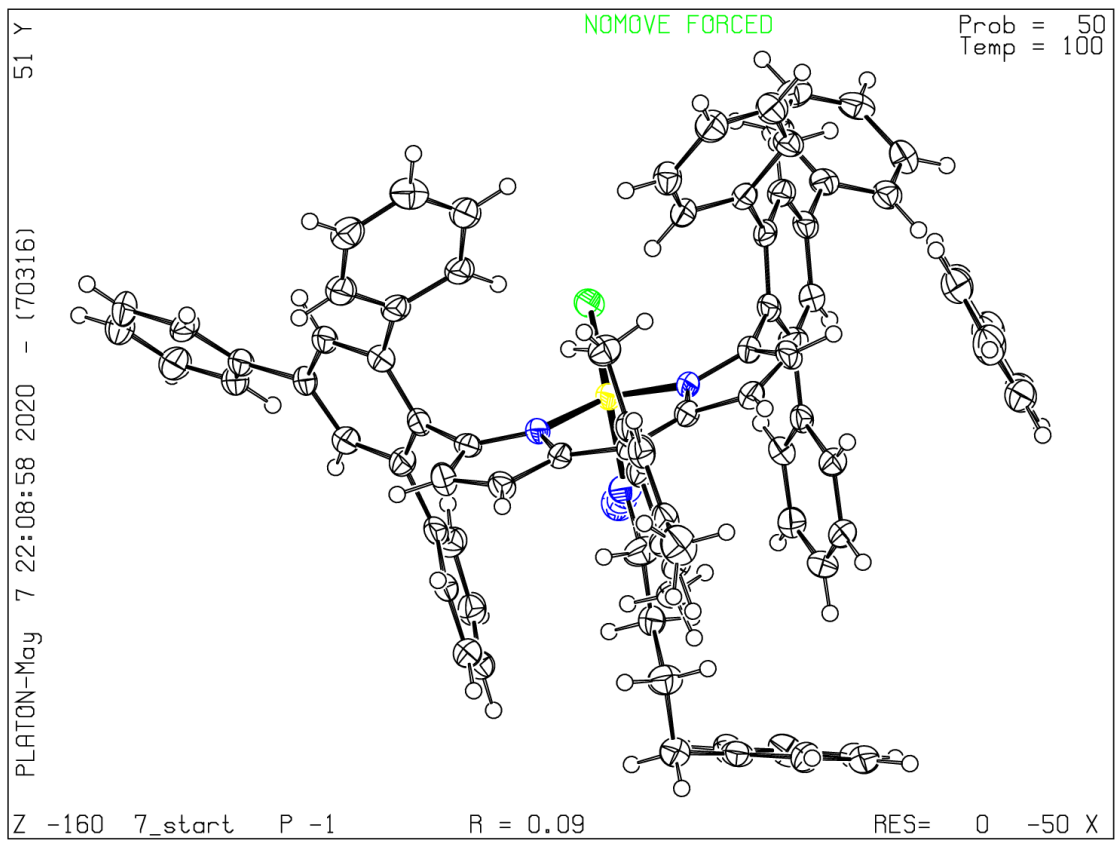

# checkCIF/PLATON report

You have not supplied any structure factors. As a result the full set of tests cannot be run.

THIS REPORT IS FOR GUIDANCE ONLY. IF USED AS PART OF A REVIEW PROCEDURE FOR PUBLICATION, IT SHOULD NOT REPLACE THE EXPERTISE OF AN EXPERIENCED CRYSTALLOGRAPHIC REFEREE.

No syntax errors found.      CIF dictionary      Interpreting this report

## Datablock: 7-N2

---

Bond precision:    C-C = 0.0050 A                      Wavelength=0.41328

Cell:                a=11.866(3)                b=12.306(3)                c=22.704(5)  
                      alpha=87.988(4)            beta=89.482(4)            gamma=72.256(4)

Temperature:      100 K

|                | Calculated                                    | Reported                                |
|----------------|-----------------------------------------------|-----------------------------------------|
| Volume         | 3155.6(13)                                    | 3155.6(11)                              |
| Space group    | P -1                                          | P -1                                    |
| Hall group     | -P 1                                          | -P 1                                    |
| Moiety formula | C76 H62 Br Co N3.62,<br>0.5(C6 H6), 0.572(N2) | C76 H62 Br Co N3.63,<br>0.57(N2), C3 H3 |
| Sum formula    | C79 H65 Br Co N4.77                           | C79 H65 Br Co N4.77                     |
| Mr             | 1219.94                                       | 1219.97                                 |
| Dx, g cm-3     | 1.284                                         | 1.284                                   |
| Z              | 2                                             | 2                                       |
| Mu (mm-1)      | 0.233                                         | 0.954                                   |
| F000           | 1268.8                                        | 1269.0                                  |
| F000'          | 1269.53                                       |                                         |
| h,k,lmax       | 14,15,28                                      | 14,15,28                                |
| Nref           | 13237                                         | 12235                                   |
| Tmin,Tmax      |                                               | 0.617,0.744                             |
| Tmin'          |                                               |                                         |

Correction method= # Reported T Limits: Tmin=0.617 Tmax=0.744  
AbsCorr = MULTI-SCAN

Data completeness= 0.924                      Theta(max)= 15.104

R(reflections)= 0.0536( 8997)                wR2(reflections)= 0.1511( 12235)

S = 1.022                                      Npar= 889

---



The following ALERTS were generated. Each ALERT has the format

**test-name\_ALERT\_alert-type\_alert-level.**

Click on the hyperlinks for more details of the test.

---

**Alert level A**

PLAT029\_ALERT\_3\_A \_diffn\_measured\_fraction\_theta\_full value Low . 0.936 Why?

**Author Response: Data was collected at a synchrotron source as a series of phi scans and this is the completeness that was obtained by this acquisition sequence. The geometry of the experiment (cryostat, LED fiber optic, detector, and beam path) prevented acquisition of omega scans.**

---

**Alert level C**

PLAT077\_ALERT\_4\_C Unitcell Contains Non-integer Number of Atoms .. Please Check  
PLAT220\_ALERT\_2\_C NonSolvent Resd 1 C Ueq(max) / Ueq(min) Range 3.2 Ratio  
PLAT234\_ALERT\_4\_C Large Hirshfeld Difference C1\_2 --C2\_2 . 0.16 Ang.

---

**Alert level G**

ABSMU01\_ALERT\_1\_G Calculation of \_exptl\_absorpt\_correction\_mu  
not performed for this radiation type.  
PLAT002\_ALERT\_2\_G Number of Distance or Angle Restraints on AtSite 23 Note  
PLAT003\_ALERT\_2\_G Number of Uiso or Uij Restrained non-H Atoms ... 23 Report  
PLAT042\_ALERT\_1\_G Calc. and Reported MoietyFormula Strings Differ Please Check  
PLAT092\_ALERT\_4\_G Check: Wavelength Given is not Cu,Ga,Mo,Ag,In Ka 0.41328 Ang.  
PLAT152\_ALERT\_1\_G The Supplied and Calc. Volume s.u. Differ by ... 2 Units  
PLAT154\_ALERT\_1\_G The s.u.'s on the Cell Angles are Equal ..(Note) 0.004 Degree  
PLAT172\_ALERT\_4\_G The CIF-Embedded .res File Contains DFIX Records 3 Report  
PLAT175\_ALERT\_4\_G The CIF-Embedded .res File Contains SAME Records 1 Report  
PLAT176\_ALERT\_4\_G The CIF-Embedded .res File Contains SADI Records 1 Report  
PLAT177\_ALERT\_4\_G The CIF-Embedded .res File Contains DELU Records 3 Report  
PLAT178\_ALERT\_4\_G The CIF-Embedded .res File Contains SIMU Records 3 Report  
PLAT230\_ALERT\_2\_G Hirshfeld Test Diff for N1A --C1\_2 . 5.2 s.u.  
PLAT232\_ALERT\_2\_G Hirshfeld Test Diff (M-X) Br1 --Co1 . 10.3 s.u.  
PLAT301\_ALERT\_3\_G Main Residue Disorder .....(Resd 1 ) 13% Note  
PLAT302\_ALERT\_4\_G Anion/Solvent/Minor-Residue Disorder (Resd 3 ) 100% Note  
PLAT304\_ALERT\_4\_G Non-Integer Number of Atoms in ..... (Resd 1 ) 143.62 Check  
PLAT304\_ALERT\_4\_G Non-Integer Number of Atoms in ..... (Resd 3 ) 1.14 Check  
PLAT720\_ALERT\_4\_G Number of Unusual/Non-Standard Labels ..... 42 Note  
PLAT860\_ALERT\_3\_G Number of Least-Squares Restraints ..... 174 Note  
PLAT984\_ALERT\_1\_G The Br-f'= 0.2880 Deviates from the B&C-Value 0.2863 Check  
PLAT985\_ALERT\_1\_G The Br-f"= 0.9627 Deviates from the B&C-Value 0.9639 Check  
PLAT985\_ALERT\_1\_G The Co-f"= 0.3155 Deviates from the B&C-Value 0.3559 Check

---

1 **ALERT level A** = Most likely a serious problem - resolve or explain  
0 **ALERT level B** = A potentially serious problem, consider carefully  
3 **ALERT level C** = Check. Ensure it is not caused by an omission or oversight  
23 **ALERT level G** = General information/check it is not something unexpected

7 ALERT type 1 CIF construction/syntax error, inconsistent or missing data  
5 ALERT type 2 Indicator that the structure model may be wrong or deficient  
3 ALERT type 3 Indicator that the structure quality may be low  
12 ALERT type 4 Improvement, methodology, query or suggestion  
0 ALERT type 5 Informative message, check

---

---

It is advisable to attempt to resolve as many as possible of the alerts in all categories. Often the minor alerts point to easily fixed oversights, errors and omissions in your CIF or refinement strategy, so attention to these fine details can be worthwhile. In order to resolve some of the more serious problems it may be necessary to carry out additional measurements or structure refinements. However, the purpose of your study may justify the reported deviations and the more serious of these should normally be commented upon in the discussion or experimental section of a paper or in the "special\_details" fields of the CIF. checkCIF was carefully designed to identify outliers and unusual parameters, but every test has its limitations and alerts that are not important in a particular case may appear. Conversely, the absence of alerts does not guarantee there are no aspects of the results needing attention. It is up to the individual to critically assess their own results and, if necessary, seek expert advice.

### **Publication of your CIF in IUCr journals**

A basic structural check has been run on your CIF. These basic checks will be run on all CIFs submitted for publication in IUCr journals (*Acta Crystallographica*, *Journal of Applied Crystallography*, *Journal of Synchrotron Radiation*); however, if you intend to submit to *Acta Crystallographica Section C* or *E* or *IUCrData*, you should make sure that full publication checks are run on the final version of your CIF prior to submission.

### **Publication of your CIF in other journals**

Please refer to the *Notes for Authors* of the relevant journal for any special instructions relating to CIF submission.

---

**PLATON version of 22/04/2020; check.def file version of 09/03/2020**

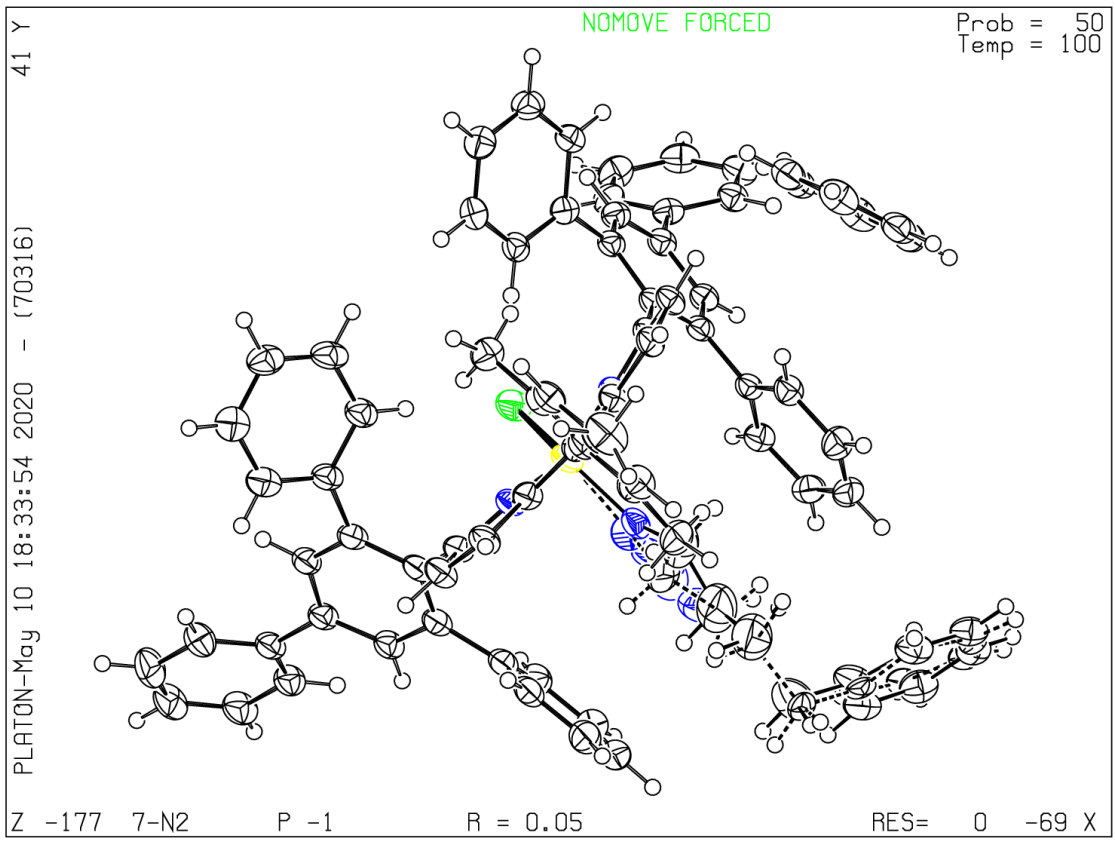

# checkCIF/PLATON report

You have not supplied any structure factors. As a result the full set of tests cannot be run.

THIS REPORT IS FOR GUIDANCE ONLY. IF USED AS PART OF A REVIEW PROCEDURE FOR PUBLICATION, IT SHOULD NOT REPLACE THE EXPERTISE OF AN EXPERIENCED CRYSTALLOGRAPHIC REFEREE.

No syntax errors found.      CIF dictionary      Interpreting this report

## Datablock: 8\_start

---

|                        |                                 |                    |             |
|------------------------|---------------------------------|--------------------|-------------|
| Bond precision:        | C-C = 0.0051 A                  | Wavelength=0.41328 |             |
| Cell:                  | a=11.4854(11)                   | b=21.580(2)        | c=25.393(3) |
|                        | alpha=90                        | beta=98.729(2)     | gamma=90    |
| Temperature:           | 100 K                           |                    |             |
|                        | Calculated                      | Reported           |             |
| Volume                 | 6220.9(11)                      | 6220.8(10)         |             |
| Space group            | P 21/c                          | P 1 21/c 1         |             |
| Hall group             | -P 2ybc                         | -P 2ybc            |             |
| Moiety formula         | C72 H62 Br Co N5 [+<br>solvent] | C72 H62 Br Co N5   |             |
| Sum formula            | C72 H62 Br Co N5 [+<br>solvent] | C72 H62 Br Co N5   |             |
| Mr                     | 1136.10                         | 1136.10            |             |
| Dx, g cm <sup>-3</sup> | 1.213                           | 1.213              |             |
| Z                      | 4                               | 4                  |             |
| Mu (mm <sup>-1</sup> ) | 0.234                           | 0.963              |             |
| F000                   | 2364.0                          | 2364.0             |             |
| F000'                  | 2365.58                         |                    |             |
| h,k,lmax               | 14,27,31                        | 14,26,31           |             |
| Nref                   | 12994                           | 12277              |             |
| Tmin,Tmax              |                                 | 0.701,0.736        |             |
| Tmin'                  |                                 |                    |             |

Correction method= # Reported T Limits: Tmin=0.701 Tmax=0.736  
AbsCorr = MULTI-SCAN

Data completeness= 0.945

Theta(max)= 15.080

R(reflections)= 0.0546( 9027)

wR2(reflections)= 0.1630( 12277)

S = 1.043

Npar= 717

---

The following ALERTS were generated. Each ALERT has the format

**test-name\_ALERT\_alert-type\_alert-level.**

Click on the hyperlinks for more details of the test.

---

**Alert level B**

PLAT029\_ALERT\_3\_B \_diffn\_measured\_fraction\_theta\_full value Low . 0.953 Why?

**Author Response: Data was collected at a synchrotron source as a series of phi scans and this is the completeness that was obtained by this acquisition sequence. The geometry of the experiment (cryostat, LED fiber optic, detector, and beam path) prevented acquisition of omega scans.**

---

**Alert level C**

PLAT220\_ALERT\_2\_C NonSolvent Resd 1 C Ueq(max) / Ueq(min) Range 6.0 Ratio  
PLAT222\_ALERT\_3\_C NonSolvent Resd 1 H Uiso(max)/Uiso(min) Range 7.0 Ratio  
PLAT242\_ALERT\_2\_C Low 'MainMol' Ueq as Compared to Neighbors of C3 Check  
PLAT242\_ALERT\_2\_C Low 'MainMol' Ueq as Compared to Neighbors of C4 Check  
PLAT360\_ALERT\_2\_C Short C(sp3)-C(sp3) Bond C4 - C6 . 1.38 Ang.  
PLAT411\_ALERT\_2\_C Short Inter H...H Contact H68 ..H68 . 2.13 Ang.  
1-x,1-y,1-z = 3\_666 Check

---

**Alert level G**

ABSMU01\_ALERT\_1\_G Calculation of \_exptl\_absorpt\_correction\_mu  
not performed for this radiation type.  
PLAT002\_ALERT\_2\_G Number of Distance or Angle Restraints on AtSite 10 Note  
PLAT003\_ALERT\_2\_G Number of Uiso or Uij Restrained non-H Atoms ... 6 Report  
PLAT092\_ALERT\_4\_G Check: Wavelength Given is not Cu,Ga,Mo,Ag,In Ka 0.41328 Ang.  
PLAT172\_ALERT\_4\_G The CIF-Embedded .res File Contains DFIX Records 5 Report  
PLAT176\_ALERT\_4\_G The CIF-Embedded .res File Contains SADI Records 1 Report  
PLAT187\_ALERT\_4\_G The CIF-Embedded .res File Contains RIGU Records 1 Report  
PLAT606\_ALERT\_4\_G VERY LARGE Solvent Accessible VOID(S) in Structure ! Info  
PLAT860\_ALERT\_3\_G Number of Least-Squares Restraints ..... 44 Note  
PLAT883\_ALERT\_1\_G No Info/Value for \_atom\_sites\_solution\_primary . Please Do !  
PLAT933\_ALERT\_2\_G Number of OMIT Records in Embedded .res File ... 1 Note  
PLAT984\_ALERT\_1\_G The Br-f'= 0.2880 Deviates from the B&C-Value 0.2863 Check  
PLAT985\_ALERT\_1\_G The Br-f"= 0.9627 Deviates from the B&C-Value 0.9639 Check  
PLAT985\_ALERT\_1\_G The Co-f"= 0.3155 Deviates from the B&C-Value 0.3559 Check

---

0 **ALERT level A** = Most likely a serious problem - resolve or explain  
1 **ALERT level B** = A potentially serious problem, consider carefully  
6 **ALERT level C** = Check. Ensure it is not caused by an omission or oversight  
14 **ALERT level G** = General information/check it is not something unexpected

5 ALERT type 1 CIF construction/syntax error, inconsistent or missing data  
8 ALERT type 2 Indicator that the structure model may be wrong or deficient  
3 ALERT type 3 Indicator that the structure quality may be low  
5 ALERT type 4 Improvement, methodology, query or suggestion  
0 ALERT type 5 Informative message, check

---

---

It is advisable to attempt to resolve as many as possible of the alerts in all categories. Often the minor alerts point to easily fixed oversights, errors and omissions in your CIF or refinement strategy, so attention to these fine details can be worthwhile. In order to resolve some of the more serious problems it may be necessary to carry out additional measurements or structure refinements. However, the purpose of your study may justify the reported deviations and the more serious of these should normally be commented upon in the discussion or experimental section of a paper or in the "special\_details" fields of the CIF. checkCIF was carefully designed to identify outliers and unusual parameters, but every test has its limitations and alerts that are not important in a particular case may appear. Conversely, the absence of alerts does not guarantee there are no aspects of the results needing attention. It is up to the individual to critically assess their own results and, if necessary, seek expert advice.

### **Publication of your CIF in IUCr journals**

A basic structural check has been run on your CIF. These basic checks will be run on all CIFs submitted for publication in IUCr journals (*Acta Crystallographica*, *Journal of Applied Crystallography*, *Journal of Synchrotron Radiation*); however, if you intend to submit to *Acta Crystallographica Section C* or *E* or *IUCrData*, you should make sure that full publication checks are run on the final version of your CIF prior to submission.

### **Publication of your CIF in other journals**

Please refer to the *Notes for Authors* of the relevant journal for any special instructions relating to CIF submission.

---

**PLATON version of 22/04/2020; check.def file version of 09/03/2020**

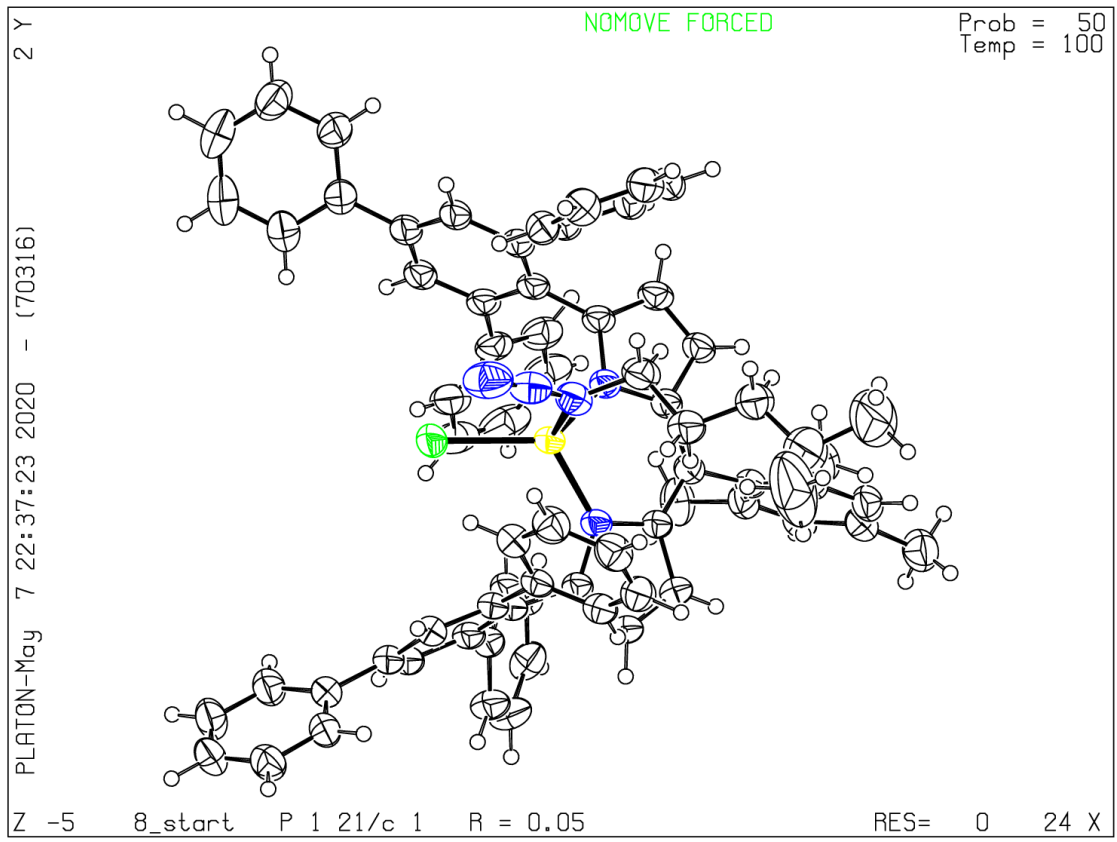

# checkCIF/PLATON report

You have not supplied any structure factors. As a result the full set of tests cannot be run.

THIS REPORT IS FOR GUIDANCE ONLY. IF USED AS PART OF A REVIEW PROCEDURE FOR PUBLICATION, IT SHOULD NOT REPLACE THE EXPERTISE OF AN EXPERIENCED CRYSTALLOGRAPHIC REFEREE.

No syntax errors found.      CIF dictionary      Interpreting this report

## Datablock: 8-N2

---

|                        |                                                  |                                              |
|------------------------|--------------------------------------------------|----------------------------------------------|
| Bond precision:        | C-C = 0.0047 A                                   | Wavelength=0.41328                           |
| Cell:                  | a=11.4265(9)      b=21.5332(18)      c=25.652(2) | alpha=90      beta=98.6512(17)      gamma=90 |
| Temperature:           | 100 K                                            |                                              |
|                        | Calculated                                       | Reported                                     |
| Volume                 | 6239.8(9)                                        | 6239.9(9)                                    |
| Space group            | P 21/c                                           | P 1 21/c 1                                   |
| Hall group             | -P 2ybc                                          | -P 2ybc                                      |
| Moiety formula         | C72 H62 Br Co N3.69,<br>0.22(N2) [+ solvent]     | C72 H62 Br Co N3.69,<br>0.22(N2)             |
| Sum formula            | C72 H62 Br Co N4.13 [+<br>solvent]               | C72 H62 Br Co N4.08                          |
| Mr                     | 1123.91                                          | 1123.25                                      |
| Dx, g cm <sup>-3</sup> | 1.196                                            | 1.196                                        |
| Z                      | 4                                                | 4                                            |
| Mu (mm <sup>-1</sup> ) | 0.233                                            | 0.959                                        |
| F000                   | 2339.6                                           | 2338.0                                       |
| F000'                  | 2341.24                                          |                                              |
| h,k,lmax               | 14,27,32                                         | 13,26,31                                     |
| Nref                   | 12936                                            | 12257                                        |
| Tmin,Tmax              |                                                  | 0.703,0.744                                  |
| Tmin'                  |                                                  |                                              |

Correction method= # Reported T Limits: Tmin=0.703 Tmax=0.744  
AbsCorr = MULTI-SCAN

Data completeness= 0.948      Theta(max)= 15.039

R(reflections)= 0.0518( 9409)      wR2(reflections)= 0.1471( 12257)

S = 1.017      Npar= 803

---



The following ALERTS were generated. Each ALERT has the format

**test-name\_ALERT\_alert-type\_alert-level.**

Click on the hyperlinks for more details of the test.

---

**Alert level B**

PLAT029\_ALERT\_3\_B \_diffrn\_measured\_fraction\_theta\_full value Low . 0.952 Why?

**Author Response: Data was collected at a synchrotron source as a series of phi scans and this is the completeness that was obtained by this acquisition sequence. The geometry of the experiment (cryostat, LED fiber optic, detector, and beam path) prevented acquisition of omega scans.**

---

**Alert level C**

PLAT077\_ALERT\_4\_C Unitcell Contains Non-integer Number of Atoms .. Please Check  
PLAT220\_ALERT\_2\_C NonSolvent Resd 1 C Ueq(max) / Ueq(min) Range 5.5 Ratio  
PLAT222\_ALERT\_3\_C NonSolvent Resd 1 H Uiso(max)/Uiso(min) Range 6.2 Ratio  
PLAT260\_ALERT\_2\_C Large Average Ueq of Residue Including N1N 0.173 Check

---

**Alert level G**

FORMU01\_ALERT\_1\_G There is a discrepancy between the atom counts in the  
\_chemical\_formula\_sum and \_chemical\_formula\_moiety. This is  
usually due to the moiety formula being in the wrong format.  
Atom count from \_chemical\_formula\_sum: C72 H62 Br1 Co1 N4.08  
Atom count from \_chemical\_formula\_moiety:C72 H62 Br1 Co1 N4.13

FORMU01\_ALERT\_2\_G There is a discrepancy between the atom counts in the  
\_chemical\_formula\_sum and the formula from the \_atom\_site\* data.  
Atom count from \_chemical\_formula\_sum:C72 H62 Br1 Co1 N4.08  
Atom count from the \_atom\_site data: C72 H62 Br1 Co1 N4.13

ABSMU01\_ALERT\_1\_G Calculation of \_exptl\_absorpt\_correction\_mu  
not performed for this radiation type.

CELLZ01\_ALERT\_1\_G Difference between formula and atom\_site contents detected.  
CELLZ01\_ALERT\_1\_G ALERT: check formula stoichiometry or atom site occupancies.  
From the CIF: \_cell\_formula\_units\_Z 4  
From the CIF: \_chemical\_formula\_sum C72 H62 Br Co N4.08  
TEST: Compare cell contents of formula and atom\_site data

| atom | Z*formula | cif sites | diff  |
|------|-----------|-----------|-------|
| C    | 288.00    | 288.00    | 0.00  |
| H    | 248.00    | 248.00    | 0.00  |
| Br   | 4.00      | 4.00      | 0.00  |
| Co   | 4.00      | 4.00      | 0.00  |
| N    | 16.32     | 16.52     | -0.20 |

PLAT002\_ALERT\_2\_G Number of Distance or Angle Restraints on AtSite 18 Note  
PLAT003\_ALERT\_2\_G Number of Uiso or Uij Restrained non-H Atoms ... 17 Report  
PLAT041\_ALERT\_1\_G Calc. and Reported SumFormula Strings Differ Please Check  
PLAT083\_ALERT\_2\_G SHELXL Second Parameter in WGHT Unusually Large 5.32 Why ?  
PLAT092\_ALERT\_4\_G Check: Wavelength Given is not Cu,Ga,Mo,Ag,In Ka 0.41328 Ang.  
PLAT172\_ALERT\_4\_G The CIF-Embedded .res File Contains DFIX Records 4 Report  
PLAT175\_ALERT\_4\_G The CIF-Embedded .res File Contains SAME Records 1 Report  
PLAT176\_ALERT\_4\_G The CIF-Embedded .res File Contains SADI Records 1 Report  
PLAT177\_ALERT\_4\_G The CIF-Embedded .res File Contains DELU Records 2 Report  
PLAT178\_ALERT\_4\_G The CIF-Embedded .res File Contains SIMU Records 3 Report  
PLAT301\_ALERT\_3\_G Main Residue Disorder .....(Resd 1 ) 10% Note  
PLAT302\_ALERT\_4\_G Anion/Solvent/Minor-Residue Disorder (Resd 2 ) 100% Note  
PLAT304\_ALERT\_4\_G Non-Integer Number of Atoms in ..... (Resd 1 ) 139.69 Check

```

PLAT304_ALERT_4_G Non-Integer Number of Atoms in ..... (Resd 2 )      0.44 Check
PLAT413_ALERT_2_G Short Inter XH3 .. XHn      H6A_2      ..H43B      .      2.14 Ang.
                                     x,1/2-y,1/2+z =      4_566 Check
PLAT431_ALERT_2_G Short Inter HL..A Contact Br1      ..N2N      .      3.16 Ang.
                                     x,y,z =      1_555 Check
PLAT606_ALERT_4_G VERY LARGE Solvent Accessible VOID(S) in Structure      ! Info
PLAT720_ALERT_4_G Number of Unusual/Non-Standard Labels .....      38 Note
PLAT860_ALERT_3_G Number of Least-Squares Restraints .....      117 Note
PLAT984_ALERT_1_G The Br-f'='      0.2880 Deviates from the B&C-Value      0.2863 Check
PLAT985_ALERT_1_G The Br-f"="      0.9627 Deviates from the B&C-Value      0.9639 Check
PLAT985_ALERT_1_G The Co-f"="      0.3155 Deviates from the B&C-Value      0.3559 Check

```

---

```

0 ALERT level A = Most likely a serious problem - resolve or explain
1 ALERT level B = A potentially serious problem, consider carefully
4 ALERT level C = Check. Ensure it is not caused by an omission or oversight
27 ALERT level G = General information/check it is not something unexpected

```

```

8 ALERT type 1 CIF construction/syntax error, inconsistent or missing data
8 ALERT type 2 Indicator that the structure model may be wrong or deficient
4 ALERT type 3 Indicator that the structure quality may be low
12 ALERT type 4 Improvement, methodology, query or suggestion
0 ALERT type 5 Informative message, check

```

---

It is advisable to attempt to resolve as many as possible of the alerts in all categories. Often the minor alerts point to easily fixed oversights, errors and omissions in your CIF or refinement strategy, so attention to these fine details can be worthwhile. In order to resolve some of the more serious problems it may be necessary to carry out additional measurements or structure refinements. However, the purpose of your study may justify the reported deviations and the more serious of these should normally be commented upon in the discussion or experimental section of a paper or in the "special\_details" fields of the CIF. checkCIF was carefully designed to identify outliers and unusual parameters, but every test has its limitations and alerts that are not important in a particular case may appear. Conversely, the absence of alerts does not guarantee there are no aspects of the results needing attention. It is up to the individual to critically assess their own results and, if necessary, seek expert advice.

### Publication of your CIF in IUCr journals

A basic structural check has been run on your CIF. These basic checks will be run on all CIFs submitted for publication in IUCr journals (*Acta Crystallographica*, *Journal of Applied Crystallography*, *Journal of Synchrotron Radiation*); however, if you intend to submit to *Acta Crystallographica Section C* or *E* or *IUCrData*, you should make sure that full publication checks are run on the final version of your CIF prior to submission.

### Publication of your CIF in other journals

Please refer to the *Notes for Authors* of the relevant journal for any special instructions relating to CIF submission.

---

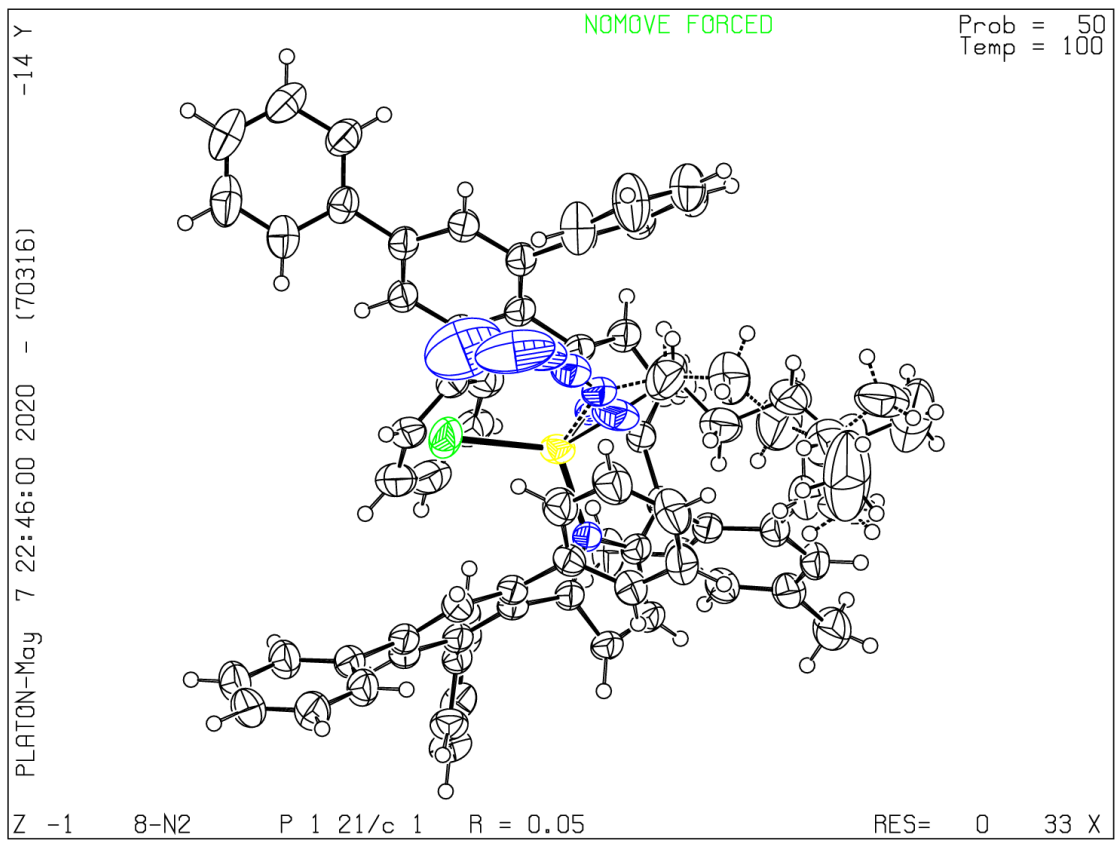

Supplement: NIHMS1826488-supplement-Supporting_Information.pdf [file NIHMS1826488-supplement-Supporting_Information.pdf]
